# Supplementary material for: SRSF3 promotes pluripotency through Nanog mRNA export and coordination of the pluripotency gene expression program
Source: eLife. 2018 May 9;7:e37419. doi: 10.7554/eLife.37419 (PMC5963917; doi:10.7554/eLife.37419)
Supplement: Figure 5—source data 1. [file elife-37419-fig5-data1.xlsx]

## Sheet: Legend
Figure 5 – Source Data 1. Alternative splicing events following SRSF3 depletion. MISO was applied to analyse the alternative splicing changes following SRSF3 depletion. The table contains all assessed events.

## Sheet: SE
		ctrl-1 PSI			KO-1 PSI			ctrl-2 PSI			KO-2 PSI			diff-1	Bayes-1	diff-2	Bayes-2
gene_ID	event_name	rep1_sample1_pos_mean	rep1_sample1_ci_low	rep1_sample1_ci_high	rep1_sample2_pos_mean	rep1_sample2_ci_low	rep1_sample2_ci_high	rep2_sample1_pos_mean	rep2_sample1_ci_low	rep2_sample1_ci_high	rep2_sample2_pos_mean	rep2_sample2_ci_low	rep2_sample2_ci_high	rep1_diff	rep1_bayes_factor	rep2_diff	rep2_bayes_factor
ENSMUSG00000006673	chr9:108528589:108528918:+@chr9:108533587:108534618:+@chr9:108541688:108541865:+	0.96	0.92	0.99	0.34	0.31	0.38	0.96	0.92	0.99	0.35	0.31	0.4	0.62	1000000000000	0.61	1000000000000
ENSMUSG00000042605	chr5:121779418:121779596:+@chr5:121781333:121781542:+@chr5:121783857:121784039:+	0.87	0.74	0.97	0.31	0.19	0.46	0.87	0.74	0.97	0.41	0.28	0.55	0.56	1000000000000	0.46	1000000000000
ENSMUSG00000045962	chr6:119956071:119956196:-@chr6:119952685:119952969:-@chr6:119951898:119951995:-	0.77	0.71	0.83	0.29	0.23	0.36	0.77	0.71	0.83	0.33	0.27	0.4	0.48	1000000000000	0.44	1000000000000
ENSMUSG00000026790	chr2:29892186:29892276:+@chr2:29893038:29893154:+@chr2:29893444:29893569:+	0.85	0.79	0.91	0.5	0.41	0.6	0.85	0.79	0.91	0.51	0.4	0.61	0.35	1000000000000	0.34	1000000000000
ENSMUSG00000025353	chr10:128821542:128821631:-@chr10:128820261:128820514:-@chr10:128819954:128820105:-	0.79	0.71	0.86	0.42	0.34	0.49	0.79	0.71	0.86	0.49	0.41	0.57	0.37	1000000000000	0.3	1000000000000
ENSMUSG00000009585	chr15:79898111:79898225:+@chr15:79899020:79899118:+@chr15:79905444:79905600:+	0.3	0.26	0.35	0.01	0	0.03	0.3	0.26	0.35	0.01	0	0.04	0.29	1000000000000	0.29	1000000000000
ENSMUSG00000004980	chr6:51463411:51463493:-@chr6:51461920:51462055:-@chr6:51460932:51461433:-	0.45	0.41	0.48	0.23	0.2	0.26	0.45	0.41	0.48	0.23	0.2	0.25	0.22	1000000000000	0.22	1000000000000
ENSMUSG00000029177	chr5:30666902:30667113:+@chr5:30669692:30669828:+@chr5:30672464:30672570:+	0.34	0.3	0.38	0.15	0.12	0.19	0.34	0.3	0.38	0.11	0.08	0.15	0.19	1000000000000	0.23	1000000000000
ENSMUSG00000024392	chr17:35142307:35142384:+@chr17:35142498:35142605:+@chr17:35142727:35142839:+	0.82	0.76	0.87	0.55	0.47	0.64	0.82	0.76	0.87	0.52	0.43	0.61	0.27	3.70222e+11	0.3	1000000000000
ENSMUSG00000026790	chr2:29892186:29892276:+@chr2:29893001:29893154:+@chr2:29893444:29893569:+	0.92	0.88	0.95	0.67	0.58	0.76	0.92	0.88	0.95	0.68	0.59	0.76	0.25	1000000000000	0.24	3.02087e+11
ENSMUSG00000050043	chr2:84676097:84676157:-@chr2:84675745:84675858:-@chr2:84675405:84675481:-	0.85	0.78	0.9	0.57	0.49	0.65	0.85	0.78	0.9	0.57	0.49	0.66	0.28	1000000000000	0.28	3.95264e+10
ENSMUSG00000041225	chr18:6061847:6061972:-@chr18:6057517:6057591:-@chr18:6052862:6052923:-	0.74	0.63	0.84	0.19	0.09	0.33	0.74	0.63	0.84	0.23	0.09	0.39	0.55	1000000000000	0.51	5.03894e+09
ENSMUSG00000030825	chr7:45562915:45563019:+@chr7:45565955:45566022:+@chr7:45566120:45566216:+	0.64	0.57	0.7	0.88	0.82	0.93	0.64	0.57	0.7	0.91	0.85	0.95	-0.24	2.71148e+09	-0.27	1000000000000
ENSMUSG00000029063	chr4:155587685:155587784:+@chr4:155587861:155588018:+@chr4:155588610:155588692:+	0.75	0.67	0.83	0.28	0.22	0.35	0.75	0.67	0.83	0.43	0.34	0.53	0.47	1000000000000	0.32	396916
ENSMUSG00000066568	chr7:34365615:34365737:-@chr7:34357766:34357942:-@chr7:34357434:34357496:-	0.86	0.83	0.9	0.62	0.56	0.68	0.86	0.83	0.9	0.7	0.64	0.76	0.24	1000000000000	0.16	226673
ENSMUSG00000032624	chr17:83421606:83421735:+@chr17:83425258:83425431:+@chr17:83427223:83427351:+	0.8	0.74	0.87	0.32	0.23	0.42	0.8	0.74	0.87	0.47	0.34	0.61	0.48	1000000000000	0.33	75264.7
ENSMUSG00000029475	chr5:122881964:122882224:-@chr5:122881637:122881750:-@chr5:122881020:122881058:-	0.57	0.47	0.69	0.2	0.13	0.27	0.57	0.47	0.69	0.25	0.17	0.35	0.37	1000000000000	0.32	38871.6
ENSMUSG00000025353	chr10:128821542:128821631:-@chr10:128820261:128820560:-@chr10:128819954:128820105:-	0.68	0.6	0.76	0.35	0.28	0.42	0.68	0.6	0.76	0.41	0.34	0.49	0.33	1000000000000	0.27	9340.06
ENSMUSG00000074643,ENSMUSG00000027618	chr2:156103349:156103429:-@chr2:156096418:156098372:-@chr2:156079339:156079464:-	0.89	0.85	0.93	0.62	0.52	0.72	0.89	0.85	0.93	0.59	0.5	0.68	0.27	1706.55	0.3	1000000000000
ENSMUSG00000024663	chr19:10027560:10027637:+@chr19:10028285:10028503:+@chr19:10030150:10030278:+	0.77	0.61	0.91	0.18	0.09	0.3	0.77	0.61	0.91	0.34	0.2	0.51	0.59	1000000000000	0.43	56.19
ENSMUSG00000021843	chr14:47726226:47726309:+@chr14:47726471:47726554:+@chr14:47730340:47730423:+	0.41	0.34	0.48	0.6	0.5	0.71	0.41	0.34	0.48	0.77	0.66	0.86	-0.19	11.61	-0.36	1000000000000
ENSMUSG00000064043	chr17:47317768:47317921:+@chr17:47319352:47319678:+@chr17:47323278:47323662:+	0.89	0.69	1	0.23	0.07	0.48	0.89	0.69	1	0.23	0.11	0.41	0.66	5.72106e+11	0.66	2822.02
ENSMUSG00000024127	chr17:85090106:85090267:-@chr17:85088340:85088875:-@chr17:85083193:85083315:-	0.73	0.64	0.8	0.42	0.34	0.51	0.73	0.64	0.8	0.43	0.35	0.52	0.31	1.15416e+09	0.3	3.68829e+11
ENSMUSG00000064043	chr17:47317768:47317921:+@chr17:47319352:47319618:+@chr17:47323278:47323662:+	0.89	0.72	0.99	0.22	0.07	0.42	0.89	0.72	0.99	0.25	0.09	0.46	0.67	2.33311e+11	0.64	3.82954e+10
ENSMUSG00000027104	chr2:73850589:73850717:-@chr2:73846197:73846375:-@chr2:73842360:73842446:-	0.64	0.54	0.73	0.26	0.18	0.36	0.64	0.54	0.73	0.3	0.21	0.42	0.38	6.19698e+10	0.34	162478
NA	chr14:25658107:25658273:+@chr14:25661267:25661521:+@chr14:25662940:25666747:+	0.85	0.74	0.94	0.42	0.32	0.54	0.85	0.74	0.94	0.5	0.38	0.66	0.43	2.96303e+10	0.35	329.39
NA	chr11:54691238:54691740:+@chr11:54694270:54694572:+@chr11:54696080:54699286:+	0.84	0.7	0.94	0.65	0.48	0.81	0.84	0.7	0.94	0.38	0.25	0.54	0.19	0.87	0.46	1.28011e+10
ENSMUSG00000031024	chr7:109570007:109570111:-@chr7:109556211:109557461:-@chr7:109552975:109553111:-	0.89	0.73	0.99	0.53	0.38	0.7	0.89	0.73	0.99	0.44	0.32	0.59	0.36	1245	0.45	4.39925e+09
ENSMUSG00000043257	chr4:133669738:133669860:-@chr4:133664658:133664933:-@chr4:133661425:133662791:-	0.7	0.5	0.89	0.14	0.05	0.32	0.7	0.5	0.89	0.28	0.14	0.47	0.56	3.82163e+09	0.42	35.94
ENSMUSG00000040025	chr4:132210752:132210831:-@chr4:132205514:132205715:-@chr4:132184916:132186947:-	0.97	0.94	0.99	0.74	0.65	0.82	0.97	0.94	0.99	0.75	0.66	0.85	0.23	6.65755e+08	0.22	3032.44
ENSMUSG00000034883	chr12:69171862:69171960:+@chr12:69174392:69175113:+@chr12:69178580:69179010:+	0.73	0.65	0.81	0.4	0.31	0.51	0.73	0.65	0.81	0.44	0.35	0.55	0.33	3.67717e+08	0.29	127.19
ENSMUSG00000023051	chr15:102518192:102518602:+@chr15:102520475:102520577:+@chr15:102521121:102521213:+	0.94	0.85	0.99	0.53	0.36	0.71	0.94	0.85	0.99	0.54	0.37	0.72	0.41	2680.32	0.4	3.53886e+08
ENSMUSG00000020124	chr10:123163593:123163654:-@chr10:123153041:123153127:-@chr10:123146794:123146938:-	0.62	0.53	0.7	0.25	0.16	0.35	0.62	0.53	0.7	0.34	0.24	0.45	0.37	1.22109e+07	0.28	1205.44
ENSMUSG00000052446	chr8:71951066:71951160:+@chr8:71965794:71965916:+@chr8:71966100:71966160:+	0.41	0.27	0.57	0.92	0.77	0.99	0.41	0.27	0.57	0.71	0.5	0.89	-0.51	1.8373e+06	-0.3	3.26
ENSMUSG00000031488	chr8:27154146:27154935:-@chr8:27151597:27153159:-@chr8:27150695:27150803:-	0.58	0.5	0.66	0.31	0.25	0.39	0.58	0.5	0.66	0.42	0.33	0.51	0.27	1.71951e+06	0.16	2.9
ENSMUSG00000036617	chr2:20743459:20744291:+@chr2:20759547:20759651:+@chr2:20760215:20760264:+	0.09	0.04	0.14	0.48	0.32	0.66	0.09	0.04	0.14	0.28	0.15	0.45	-0.39	1.25447e+06	-0.19	5.35
ENSMUSG00000025227	chr19:46369237:46369333:+@chr19:46371936:46372107:+@chr19:46372182:46372375:+	0.96	0.91	0.99	0.63	0.46	0.79	0.96	0.91	0.99	0.59	0.41	0.76	0.33	606.16	0.37	281206
ENSMUSG00000020541	chr11:90673664:90673786:-@chr11:90672833:90672937:-@chr11:90671084:90671200:-	0.91	0.83	0.96	0.54	0.39	0.7	0.91	0.83	0.96	0.61	0.48	0.75	0.37	225969	0.3	25051.3
ENSMUSG00000035778	chr2:35422180:35422268:-@chr2:35414219:35414284:-@chr2:35413326:35413427:-	0.33	0.24	0.42	0.66	0.54	0.77	0.33	0.24	0.42	0.61	0.51	0.72	-0.33	99453.5	-0.28	28965.1
ENSMUSG00000003778	chr18:34611132:34611268:-@chr18:34610410:34610628:-@chr18:34609805:34609949:-	0.69	0.61	0.76	0.4	0.3	0.5	0.69	0.61	0.76	0.39	0.29	0.5	0.29	85606.4	0.3	25665.6
ENSMUSG00000027300	chr2:130628489:130628635:-@chr2:130614889:130616742:-@chr2:130604485:130604626:-	0.7	0.63	0.78	0.39	0.32	0.49	0.7	0.63	0.78	0.41	0.33	0.51	0.31	102371	0.29	8554.68
ENSMUSG00000028906	chr4:131957643:131957819:-@chr4:131937015:131937464:-@chr4:131935739:131935867:-	0.38	0.31	0.47	0.13	0.07	0.21	0.38	0.31	0.47	0.13	0.07	0.21	0.25	86275.2	0.25	19253.5
ENSMUSG00000028109	chr3:95585140:95585214:+@chr3:95585535:95585589:+@chr3:95587381:95587671:+	0.21	0.14	0.29	0.46	0.34	0.58	0.21	0.14	0.29	0.53	0.39	0.67	-0.25	44.76	-0.32	82271.6
ENSMUSG00000053460	chr6:72418301:72418466:+@chr6:72419017:72419266:+@chr6:72422416:72422494:+	0.3	0.19	0.44	0.09	0.04	0.18	0.3	0.19	0.44	0.06	0.02	0.12	0.21	10.97	0.24	72845.8
ENSMUSG00000034329	chr11:86157588:86157878:-@chr11:86152588:86152809:-@chr11:86148358:86148557:-	0.93	0.81	0.99	0.89	0.65	0.99	0.93	0.81	0.99	0.38	0.18	0.6	0.04	0.18	0.55	70944.9
ENSMUSG00000000948	chr7:60132250:60132397:-@chr7:60071885:60071988:-@chr7:59999318:59999413:-	0.03	0.01	0.06	0.18	0.08	0.32	0.03	0.01	0.06	0.49	0.27	0.84	-0.15	12.33	-0.46	66950.9
ENSMUSG00000061887	chr4:107009679:107009768:+@chr4:107027217:107027297:+@chr4:107028193:107028252:+	0.34	0.27	0.42	0.16	0.1	0.23	0.34	0.27	0.42	0.11	0.06	0.18	0.18	42.54	0.23	24450.7
ENSMUSG00000014668	chr5:110136051:110136194:+@chr5:110140117:110140189:+@chr5:110140354:110140453:+	0.14	0.09	0.19	0.53	0.35	0.7	0.14	0.09	0.19	0.35	0.22	0.51	-0.39	24080.6	-0.21	11.92
ENSMUSG00000066306	chr7:101998300:102001659:+@chr7:102002295:102002336:+@chr7:102007486:102007554:+	0.06	0.03	0.1	0.19	0.1	0.32	0.06	0.03	0.1	0.37	0.24	0.55	-0.13	2.23	-0.31	20560.5
ENSMUSG00000024498	chr18:42530648:42530890:+@chr18:42535085:42535147:+@chr18:42536178:42536378:+	0.59	0.5	0.69	0.76	0.66	0.86	0.59	0.5	0.69	0.88	0.77	0.95	-0.17	4.68	-0.29	18218.9
ENSMUSG00000032463	chr9:98986373:98986512:+@chr9:98990915:98990971:+@chr9:98992101:98992233:+	0.15	0.07	0.25	0.56	0.38	0.75	0.15	0.07	0.25	0.43	0.24	0.66	-0.41	12657.2	-0.28	6.36
ENSMUSG00000031511	chr8:11815161:11815300:+@chr8:11817660:11817884:+@chr8:11819638:11819731:+	0.86	0.71	0.98	0.56	0.35	0.78	0.86	0.71	0.98	0.37	0.24	0.53	0.3	2.55	0.49	8842.66
ENSMUSG00000033943	chr2:119938639:119938786:+@chr2:119941222:119941845:+@chr2:119946172:119946462:+	0.81	0.75	0.88	0.57	0.48	0.68	0.81	0.75	0.88	0.65	0.55	0.75	0.24	6561.66	0.16	4.61
ENSMUSG00000022185	chr14:54653535:54653685:-@chr14:54653214:54653278:-@chr14:54651717:54651858:-	0.41	0.33	0.49	0.72	0.6	0.84	0.41	0.33	0.49	0.57	0.45	0.68	-0.31	3572.12	-0.16	1.2
ENSMUSG00000033809	chr16:20608742:20608889:-@chr16:20608486:20608646:-@chr16:20607764:20607884:-	0.89	0.78	0.96	0.53	0.37	0.7	0.89	0.78	0.96	0.79	0.57	1	0.36	3184.1	0.1	0.42
ENSMUSG00000044150	chrX:159559838:159559953:+@chrX:159566428:159566542:+@chrX:159567919:159568014:+	0.89	0.8	0.97	0.58	0.46	0.71	0.89	0.8	0.97	0.6	0.48	0.72	0.31	2701.06	0.29	94.15
ENSMUSG00000049295	chr14:52020523:52020733:-@chr14:52009970:52010058:-@chr14:52008228:52009662:-	0.65	0.51	0.79	0.24	0.13	0.4	0.65	0.51	0.79	0.53	0.35	0.69	0.41	2599.92	0.12	0.53
ENSMUSG00000020717	chr11:106671742:106671798:-@chr11:106662002:106662024:-@chr11:106654218:106655162:-	0.14	0.02	0.35	0.7	0.47	0.92	0.14	0.02	0.35	0.38	0.16	0.61	-0.56	1840.89	-0.24	1.24
ENSMUSG00000031729	chr8:109676758:109676850:-@chr8:109675643:109675802:-@chr8:109675376:109675424:-	0.24	0.17	0.33	0.6	0.45	0.75	0.24	0.17	0.33	0.6	0.42	0.78	-0.36	1062.63	-0.36	655.11
ENSMUSG00000074643,ENSMUSG00000027618	chr2:156103349:156103429:-@chr2:156098230:156098372:-@chr2:156079339:156079464:-	0.77	0.67	0.85	0.49	0.36	0.63	0.77	0.67	0.85	0.4	0.28	0.53	0.28	23.12	0.37	1285.19
ENSMUSG00000031169	chrX:8205565:8205733:-@chrX:8204196:8204388:-@chrX:8203792:8203835:-	0.95	0.87	0.99	0.83	0.65	0.95	0.95	0.87	0.99	0.64	0.47	0.79	0.12	0.51	0.31	1214.23
ENSMUSG00000031310	chrX:101408477:101408591:-@chrX:101407205:101407459:-@chrX:101405905:101406019:-	0.8	0.68	0.9	0.4	0.28	0.55	0.8	0.68	0.9	0.43	0.29	0.59	0.4	395.7	0.37	383.86
ENSMUSG00000006310	chr7:30590796:30590869:-@chr7:30590633:30590701:-@chr7:30590356:30590520:-	0.53	0.39	0.67	0.92	0.81	0.98	0.53	0.39	0.67	0.87	0.64	0.98	-0.39	744.09	-0.34	12.82
ENSMUSG00000023051	chr15:102518192:102518602:+@chr15:102519122:102519291:+@chr15:102521121:102521213:+	0.98	0.94	1	0.78	0.65	0.9	0.98	0.94	1	0.78	0.65	0.89	0.2	62.21	0.2	686.74
ENSMUSG00000028809	chr4:135329373:135329517:-@chr4:135329004:135329045:-@chr4:135327092:135327223:-	0.6	0.51	0.69	0.89	0.77	0.97	0.6	0.51	0.69	0.78	0.66	0.89	-0.29	702.78	-0.18	2.8
ENSMUSG00000042726	chr5:121385525:121385615:-@chr5:121384745:121384845:-@chr5:121384040:121384104:-	0.16	0.05	0.33	0.34	0.1	0.72	0.16	0.05	0.33	0.73	0.4	0.95	-0.18	0.7	-0.57	538.21
ENSMUSG00000045098	chr19:3768022:3768340:+@chr19:3782220:3782279:+@chr19:3786389:3786627:+	0.27	0.13	0.44	0.75	0.47	0.96	0.27	0.13	0.44	0.32	0.12	0.62	-0.48	513.17	-0.05	0.37
ENSMUSG00000022568	chr15:76050050:76050112:-@chr15:76049457:76049540:-@chr15:76049203:76049301:-	0.05	0.02	0.09	0.16	0.07	0.29	0.05	0.02	0.09	0.34	0.19	0.51	-0.11	1.12	-0.29	466.06
ENSMUSG00000030766	chr7:123296410:123296566:-@chr7:123294472:123294705:-@chr7:123292036:123292205:-	0.55	0.45	0.65	0.28	0.19	0.39	0.55	0.45	0.65	0.22	0.13	0.33	0.27	290.89	0.33	115.44
ENSMUSG00000046152	chr8:31201210:31201504:+@chr8:31235595:31236430:+@chr8:31259900:31261483:+	0.94	0.81	0.99	0.52	0.33	0.75	0.94	0.81	0.99	0.88	0.75	0.98	0.42	379.8	0.06	0.27
ENSMUSG00000022517	chr16:4924423:4924532:+@chr16:4926309:4926374:+@chr16:4927675:4927901:+	0.16	0.1	0.25	0.27	0.15	0.45	0.16	0.1	0.25	0.51	0.38	0.65	-0.11	0.49	-0.35	349.31
ENSMUSG00000022185	chr14:54653535:54653685:-@chr14:54653214:54653317:-@chr14:54651717:54651858:-	0.29	0.22	0.35	0.55	0.43	0.68	0.29	0.22	0.35	0.44	0.33	0.55	-0.26	333.65	-0.15	1.55
NA	chr7:46796094:46796288:+@chr7:46797397:46797465:+@chr7:46801672:46801840:+	0.13	0.07	0.2	0.33	0.23	0.46	0.13	0.07	0.2	0.38	0.26	0.51	-0.2	24.1	-0.25	290.32
ENSMUSG00000014767	chr17:15499888:15500024:+@chr17:15501154:15501202:+@chr17:15502965:15503128:+	0.17	0.12	0.23	0.48	0.34	0.63	0.17	0.12	0.23	0.35	0.23	0.48	-0.31	308	-0.18	3.01
ENSMUSG00000032306	chr9:57548528:57548710:-@chr9:57546394:57546567:-@chr9:57545195:57545403:-	0.93	0.82	0.99	0.54	0.38	0.73	0.93	0.82	0.99	0.9	0.7	0.99	0.39	224.83	0.03	0.18
ENSMUSG00000001755	chr11:101082565:101082690:+@chr11:101082999:101083706:+@chr11:101084316:101084530:+	0.89	0.8	0.96	0.65	0.53	0.79	0.89	0.8	0.96	0.62	0.47	0.76	0.24	53.75	0.27	152.72
ENSMUSG00000026034	chr1:58421083:58421308:-@chr1:58420121:58420211:-@chr1:58419667:58419733:-	0.35	0.28	0.43	0.57	0.48	0.66	0.35	0.28	0.43	0.54	0.44	0.64	-0.22	174.32	-0.19	7.53
ENSMUSG00000020954	chr12:51647994:51648135:-@chr12:51643104:51643214:-@chr12:51633579:51633719:-	0.63	0.43	0.83	0.37	0.19	0.64	0.63	0.43	0.83	0.21	0.1	0.33	0.26	1.38	0.42	145.67
ENSMUSG00000034940	chr11:83982196:83982307:+@chr11:83985249:83985551:+@chr11:83986814:83987047:+	0.59	0.43	0.75	0.17	0.07	0.32	0.59	0.43	0.75	0.28	0.16	0.43	0.42	114.42	0.31	10.81
ENSMUSG00000026074	chr1:40000624:40000749:+@chr1:40003757:40003987:+@chr1:40004807:40004913:+	0.75	0.69	0.82	0.52	0.41	0.63	0.75	0.69	0.82	0.5	0.41	0.61	0.23	28.58	0.25	85.97
ENSMUSG00000032525	chr9:121731478:121731565:+@chr9:121738388:121740075:+@chr9:121741122:121741151:+	0.33	0.25	0.44	0.41	0.25	0.6	0.33	0.25	0.44	0.78	0.53	0.95	-0.08	0.34	-0.45	100.25
ENSMUSG00000029027	chr4:153972780:153972968:-@chr4:153972608:153972678:-@chr4:153971581:153971660:-	0.05	0.01	0.14	0.26	0.03	0.56	0.05	0.01	0.14	0.57	0.27	0.9	-0.21	0.78	-0.52	93
ENSMUSG00000039153	chr17:44717192:44717296:-@chr17:44658519:44658692:-@chr17:44639665:44639826:-	0.3	0.12	0.55	0.43	0.19	0.75	0.3	0.12	0.55	0.8	0.62	0.95	-0.13	0.54	-0.5	88.98
ENSMUSG00000028649	chr4:123365273:123365347:-@chr4:123364057:123364074:-@chr4:123360910:123361027:-	0.8	0.68	0.9	0.46	0.31	0.62	0.8	0.68	0.9	0.41	0.28	0.57	0.34	44.75	0.39	43.56
ENSMUSG00000074643,ENSMUSG00000027618	chr2:156098230:156098372:-@chr2:156079339:156079464:-@chr2:156079063:156079242:-	0.69	0.52	0.87	0.97	0.9	1	0.69	0.52	0.87	0.95	0.86	1	-0.28	78.57	-0.26	6.6
ENSMUSG00000058486	chr6:34910510:34910662:-@chr6:34909714:34909827:-@chr6:34909361:34909540:-	0.2	0.05	0.45	0.77	0.49	0.97	0.2	0.05	0.45	0.52	0.15	0.93	-0.57	83.44	-0.32	1.1
ENSMUSG00000042323	chr14:31022720:31022859:+@chr14:31023067:31023179:+@chr14:31025498:31025650:+	0.11	0.06	0.18	0.35	0.19	0.53	0.11	0.06	0.18	0.4	0.24	0.57	-0.24	3.63	-0.29	73.42
ENSMUSG00000031156	chrX:7889612:7889763:+@chrX:7892730:7892867:+@chrX:7894191:7894492:+	0.86	0.59	0.99	0.55	0.27	0.84	0.86	0.59	0.99	0.31	0.12	0.55	0.31	2.02	0.55	73.84
ENSMUSG00000041890	chr5:114745429:114745571:-@chr5:114743776:114743880:-@chr5:114739033:114739281:-	0.63	0.48	0.79	0.27	0.15	0.44	0.63	0.48	0.79	0.5	0.3	0.76	0.36	70.83	0.13	0.63
ENSMUSG00000028797	chr4:129600983:129601134:+@chr4:129601407:129601533:+@chr4:129601870:129601961:+	0.17	0.09	0.25	0.27	0.13	0.43	0.17	0.09	0.25	0.53	0.31	0.77	-0.1	0.4	-0.36	62.85
ENSMUSG00000069895	chr8:109737631:109737739:-@chr8:109735460:109735525:-@chr8:109735305:109735363:-	0.82	0.57	0.98	0.33	0.1	0.65	0.82	0.57	0.98	0.33	0.11	0.61	0.49	46.5	0.49	13.06
ENSMUSG00000074643,ENSMUSG00000027618	chr2:156111828:156111909:-@chr2:156098230:156098372:-@chr2:156079339:156079464:-	0.98	0.92	1	0.64	0.41	0.98	0.98	0.92	1	0.67	0.45	0.87	0.34	1.58	0.31	52.94
ENSMUSG00000052446	chr8:71951066:71951160:+@chr8:71965794:71965920:+@chr8:71966100:71966160:+	0.48	0.33	0.65	0.92	0.73	1	0.48	0.33	0.65	0.75	0.54	0.9	-0.44	49.75	-0.27	2.68
ENSMUSG00000040370	chr6:145211170:145211244:+@chr6:145214522:145214784:+@chr6:145215184:145215271:+	0.61	0.37	0.84	0.23	0.1	0.42	0.61	0.37	0.84	0.16	0.05	0.34	0.38	9.32	0.45	42.18
ENSMUSG00000043257	chr4:133669738:133669860:-@chr4:133664658:133665779:-@chr4:133661425:133662791:-	0.63	0.5	0.77	0.3	0.2	0.42	0.63	0.5	0.77	0.36	0.24	0.5	0.33	42.36	0.27	8.82
ENSMUSG00000027300	chr2:130629916:130630038:-@chr2:130614889:130616742:-@chr2:130604485:130604626:-	0.83	0.75	0.9	0.53	0.42	0.66	0.83	0.75	0.9	0.65	0.51	0.84	0.3	45.75	0.18	1.37
ENSMUSG00000078865	chr2:177578130:177578210:-@chr2:177574969:177575023:-@chr2:177571687:177571813:-	0.33	0.21	0.46	0.6	0.43	0.77	0.33	0.21	0.46	0.67	0.5	0.83	-0.27	10.09	-0.34	35.95
NA	chr2:74529631:74529801:-@chr2:74528092:74528174:-@chr2:74514837:74522297:-	0.19	0.12	0.27	0.37	0.25	0.53	0.19	0.12	0.27	0.43	0.31	0.56	-0.18	3.92	-0.24	41.55
ENSMUSG00000046572	chr5:38684679:38684826:-@chr5:38683193:38683258:-@chr5:38682485:38682782:-	0.26	0.16	0.4	0.66	0.47	0.82	0.26	0.16	0.4	0.55	0.31	0.77	-0.4	42.79	-0.29	1.85
ENSMUSG00000042408	chr4:127101849:127101964:+@chr4:127103412:127103687:+@chr4:127104271:127104421:+	0.96	0.9	0.99	0.67	0.46	0.85	0.96	0.9	0.99	0.81	0.64	0.94	0.29	42.12	0.15	1.43
NA	chr7:101823893:101824559:-@chr7:101823513:101823646:-@chr7:101822632:101823403:-	0.44	0.34	0.55	0.72	0.55	0.88	0.44	0.34	0.55	0.76	0.59	0.94	-0.28	7.74	-0.32	34.33
ENSMUSG00000052446	chr8:71951066:71951160:+@chr8:71965794:71965990:+@chr8:71966100:71966160:+	0.34	0.2	0.51	0.86	0.62	0.97	0.34	0.2	0.51	0.62	0.41	0.85	-0.52	38.54	-0.28	1.96
ENSMUSG00000026131	chr1:34295462:34295536:+@chr1:34296742:34296759:+@chr1:34299721:34299838:+	0.28	0.18	0.38	0.38	0.21	0.57	0.28	0.18	0.38	0.59	0.45	0.72	-0.1	0.42	-0.31	38.32
ENSMUSG00000027463	chr2:152004052:152004678:+@chr2:152005532:152006019:+@chr2:152007481:152007604:+	0.87	0.67	0.99	0.23	0.08	0.53	0.87	0.67	0.99	0.74	0.38	0.99	0.64	37.64	0.13	0.5
ENSMUSG00000079450	chrX:123117454:123117569:+@chrX:123122898:123122938:+@chrX:123142610:123143293:+	0.11	0	0.4	0.8	0.32	0.99	0.11	0	0.4	0.53	0.18	0.91	-0.69	33.56	-0.42	3.7
ENSMUSG00000074165	chr7:41634680:41634710:+@chr7:41643333:41643432:+@chr7:41647483:41647617:+	0.32	0.11	0.61	0.29	0.05	0.61	0.32	0.11	0.61	0.85	0.56	0.98	0.03	0.5	-0.53	36.29
ENSMUSG00000031592	chr8:41261011:41261181:+@chr8:41261360:41261476:+@chr8:41267187:41267364:+	0.47	0.35	0.59	0.7	0.54	0.85	0.47	0.35	0.59	0.8	0.6	0.94	-0.23	2.88	-0.33	33.52
ENSMUSG00000078906	chr2:175010241:175010321:+@chr2:175013428:175013482:+@chr2:175016638:175016764:+	0.37	0.24	0.52	0.69	0.51	0.85	0.37	0.24	0.52	0.79	0.58	0.93	-0.32	10.47	-0.42	25.63
ENSMUSG00000056763	chr1:10058720:10058823:+@chr1:10059824:10059847:+@chr1:10064333:10064413:+	0.08	0.03	0.16	0.13	0.03	0.3	0.08	0.03	0.16	0.5	0.23	0.82	-0.05	0.19	-0.42	34.51
ENSMUSG00000060227	chr2:121911871:121912041:+@chr2:121925561:121925728:+@chr2:121933478:121936207:+	0.37	0.3	0.44	0.55	0.43	0.67	0.37	0.3	0.44	0.64	0.51	0.75	-0.18	3.8	-0.27	28.23
ENSMUSG00000036009	chr10:105841076:105841380:-@chr10:105836127:105836220:-@chr10:105832851:105833015:-	0.08	0.01	0.23	0.61	0.25	0.92	0.08	0.01	0.23	0.46	0.16	0.82	-0.53	29.57	-0.38	2.4
ENSMUSG00000004359	chr10:88677500:88677608:-@chr10:88676873:88676965:-@chr10:88675270:88676070:-	0.07	0.01	0.25	0.71	0.35	0.98	0.07	0.01	0.25	0.29	0.03	0.83	-0.64	29.82	-0.22	0.65
ENSMUSG00000022517	chr16:4932200:4932298:+@chr16:4934195:4934239:+@chr16:4936896:4938296:+	0.38	0.23	0.53	0.76	0.59	0.9	0.38	0.23	0.53	0.6	0.43	0.76	-0.38	28.88	-0.22	1.51
ENSMUSG00000069601	chr10:69904198:69904270:+@chr10:69904448:69904510:+@chr10:69927695:69927818:+	0.64	0.29	0.89	0.12	0.01	0.36	0.64	0.29	0.89	0.29	0.07	0.59	0.52	27.6	0.35	2.32
ENSMUSG00000051510	chr11:120630488:120630797:-@chr11:120629986:120630016:-@chr11:120629818:120629881:-	0.5	0.29	0.73	0.1	0.01	0.28	0.5	0.29	0.73	0.28	0.06	0.65	0.4	28.69	0.22	0.95
ENSMUSG00000036555	chr5:140670467:140670567:-@chr5:140669022:140669120:-@chr5:140666008:140666208:-	0.83	0.51	0.99	0.22	0.02	0.54	0.83	0.51	0.99	0.4	0.09	0.84	0.61	23.92	0.43	3.01
ENSMUSG00000002885	chr8:83733414:83733566:-@chr8:83731903:83732037:-@chr8:83730111:83730257:-	0.25	0.17	0.34	0.52	0.38	0.68	0.25	0.17	0.34	0.41	0.28	0.56	-0.27	24.45	-0.16	1.6
ENSMUSG00000042323	chr14:31022720:31022859:+@chr14:31023067:31023170:+@chr14:31025498:31025650:+	0.08	0.04	0.15	0.31	0.16	0.49	0.08	0.04	0.15	0.27	0.14	0.45	-0.23	22.51	-0.19	3.15
ENSMUSG00000036087	chr5:72958149:72958286:+@chr5:72965804:72965881:+@chr5:72974531:72974846:+	0.2	0.12	0.29	0.46	0.3	0.67	0.2	0.12	0.29	0.53	0.36	0.72	-0.26	9.25	-0.33	15.87
ENSMUSG00000035268	chr2:163658386:163658492:+@chr2:163659150:163659235:+@chr2:163703486:163703555:+	0.18	0.09	0.29	0.54	0.35	0.75	0.18	0.09	0.29	0.29	0.12	0.49	-0.36	24.56	-0.11	0.45
ENSMUSG00000070733	chr5:73118484:73118585:-@chr5:73115256:73115300:-@chr5:73112749:73112852:-	0.53	0.33	0.72	0.15	0.01	0.36	0.53	0.33	0.72	0.34	0.14	0.63	0.38	23.27	0.19	0.84
ENSMUSG00000024083	chr17:64308622:64309666:-@chr17:64297724:64297909:-@chr17:64292839:64293024:-	0.51	0.4	0.62	0.78	0.66	0.89	0.51	0.4	0.62	0.67	0.54	0.79	-0.27	22.51	-0.16	1
ENSMUSG00000026436	chr1:132019350:132019466:+@chr1:132023553:132023838:+@chr1:132031564:132032612:+	0.44	0.29	0.61	0.7	0.49	0.92	0.44	0.29	0.61	0.85	0.66	0.97	-0.26	1.68	-0.41	21.83
ENSMUSG00000030556	chr7:67617993:67618130:-@chr7:67559858:67560064:-@chr7:67545366:67545468:-	0.78	0.62	0.91	0.67	0.38	0.97	0.78	0.62	0.91	0.41	0.25	0.61	0.11	0.62	0.37	21.71
ENSMUSG00000032370	chr9:66970582:66970936:-@chr9:66967679:66967844:-@chr9:66955393:66956200:-	0.93	0.85	0.99	0.75	0.57	0.93	0.93	0.85	0.99	0.64	0.42	0.85	0.18	1.03	0.29	21.26
ENSMUSG00000058835	chr2:22957018:22957118:-@chr2:22953435:22953608:-@chr2:22946576:22946761:-	0.92	0.78	0.99	0.78	0.63	0.9	0.92	0.78	0.99	0.66	0.53	0.81	0.14	0.69	0.26	20.76
ENSMUSG00000029772	chr6:29799439:29799584:+@chr6:29820329:29820634:+@chr6:29863143:29863251:+	0.06	0.01	0.14	0.55	0.21	0.9	0.06	0.01	0.14	0.34	0.09	0.78	-0.49	19.24	-0.28	1.91
ENSMUSG00000049550	chr5:123640494:123640554:-@chr5:123635174:123635278:-@chr5:123630225:123631169:-	0.16	0.07	0.32	0.53	0.29	0.8	0.16	0.07	0.32	0.2	0.1	0.36	-0.37	20.37	-0.04	0.25
ENSMUSG00000018411	chr11:104302361:104302410:+@chr11:104305212:104305409:+@chr11:104306626:104306758:+	0.35	0.21	0.54	0.09	0.03	0.19	0.35	0.21	0.54	0.13	0.04	0.3	0.26	16.8	0.22	3.14
ENSMUSG00000029810	chr6:48840996:48841374:-@chr6:48840361:48840453:-@chr6:48838172:48838365:-	0.27	0.14	0.43	0.66	0.44	0.87	0.27	0.14	0.43	0.31	0.17	0.47	-0.39	19.67	-0.04	0.27
ENSMUSG00000033857	chr11:118479086:118479287:+@chr11:118481276:118481424:+@chr11:118481874:118482031:+	0.9	0.69	1	0.4	0.1	0.72	0.9	0.69	1	0.52	0.19	0.94	0.5	18.08	0.38	1.77
ENSMUSG00000037902	chr2:129608904:129609260:+@chr2:129615447:129615764:+@chr2:129616223:129616558:+	0.92	0.71	1	0.58	0.31	0.91	0.92	0.71	1	0.46	0.21	0.75	0.34	2.54	0.46	17.23
ENSMUSG00000010721	chr5:29378127:29378390:-@chr5:29364921:29365815:-@chr5:29363883:29363955:-	0.31	0.19	0.48	0.13	0.04	0.33	0.31	0.19	0.48	0.05	0.01	0.15	0.18	1.03	0.26	18.57
ENSMUSG00000039585	chr9:59910584:59910707:+@chr9:59912537:59912590:+@chr9:59921723:59921925:+	0.03	0	0.1	0.33	0.13	0.56	0.03	0	0.1	0.15	0.03	0.36	-0.3	19.05	-0.12	0.49
NA	chr5:23434429:23434783:+@chr5:23446526:23446598:+@chr5:23450152:23450336:+	0.04	0	0.14	0.37	0.16	0.6	0.04	0	0.14	0.43	0.18	0.71	-0.33	12.28	-0.39	7.07
ENSMUSG00000042726	chr5:121385525:121385615:-@chr5:121384757:121384845:-@chr5:121384040:121384104:-	0.06	0.01	0.19	0.25	0.04	0.52	0.06	0.01	0.19	0.63	0.22	0.97	-0.19	0.8	-0.57	18.19
ENSMUSG00000032076	chr9:47813773:47813945:+@chr9:47818734:47818817:+@chr9:47848167:47848298:+	0.75	0.53	0.94	0.23	0.06	0.5	0.75	0.53	0.94	0.41	0.19	0.68	0.52	15.69	0.34	3.05
ENSMUSG00000031864	chr8:68822157:68822250:+@chr8:68824190:68824267:+@chr8:68825052:68825129:+	0.16	0.05	0.31	0.58	0.3	0.84	0.16	0.05	0.31	0.5	0.17	0.86	-0.42	16.69	-0.34	1.43
ENSMUSG00000000028	chr16:18810389:18810481:-@chr16:18808732:18808869:-@chr16:18807280:18807423:-	0.95	0.88	0.99	0.7	0.56	0.84	0.95	0.88	0.99	0.77	0.61	0.89	0.25	16.07	0.18	1.87
ENSMUSG00000028886	chr4:132661895:132661938:+@chr4:132670189:132670255:+@chr4:132689705:132689790:+	0.11	0.02	0.31	0.66	0.3	0.98	0.11	0.02	0.31	0.67	0.26	0.98	-0.55	12.31	-0.56	5.47
ENSMUSG00000074272	chr7:25474520:25474804:-@chr7:25473798:25474052:-@chr7:25471798:25472073:-	0.76	0.57	0.92	0.24	0.07	0.51	0.76	0.57	0.92	0.69	0.46	0.94	0.52	16.46	0.07	0.43
ENSMUSG00000026987	chr2:59962021:59962630:-@chr2:59959821:59960105:-@chr2:59958432:59958492:-	0.61	0.44	0.78	0.28	0.14	0.51	0.61	0.44	0.78	0.21	0.07	0.42	0.33	5.16	0.4	11.58
ENSMUSG00000049676	chr7:29195828:29195939:-@chr7:29195214:29195323:-@chr7:29191535:29191748:-	0.16	0.04	0.35	0.67	0.29	0.95	0.16	0.04	0.35	0.59	0.2	0.92	-0.51	13.84	-0.43	2.79
ENSMUSG00000056698	chr6:72598322:72598413:-@chr6:72596436:72596466:-@chr6:72594740:72595020:-	0.21	0.02	0.53	0.74	0.32	0.99	0.21	0.02	0.53	0.74	0.37	0.96	-0.53	8.61	-0.53	7.97
ENSMUSG00000031156	chrX:7889612:7889763:+@chrX:7892140:7892867:+@chrX:7894191:7894492:+	0.98	0.92	1	0.84	0.65	0.96	0.98	0.92	1	0.68	0.5	0.85	0.14	0.99	0.3	15.56
ENSMUSG00000031388,ENSMUSG00000031389	chrX:73919754:73919869:-@chrX:73919502:73919540:-@chrX:73917843:73917927:-	0.79	0.64	0.93	0.63	0.35	0.91	0.79	0.64	0.93	0.37	0.2	0.64	0.16	0.65	0.42	15.58
ENSMUSG00000089889	chr5:143329308:143329353:+@chr5:143330704:143330885:+@chr5:143332311:143332704:+	0.59	0.22	0.97	0.05	0	0.18	0.59	0.22	0.97	0.16	0.04	0.38	0.54	12.38	0.43	3.46
NA	chr3:115887776:115888059:-@chr3:115886214:115886375:-@chr3:115881579:115881838:-	0.2	0.06	0.42	0.2	0.03	0.67	0.2	0.06	0.42	0.7	0.35	0.94	0	0.41	-0.5	15.11
ENSMUSG00000038084	chr16:29588252:29588359:+@chr16:29588823:29588876:+@chr16:29589681:29589748:+	0.37	0.3	0.46	0.59	0.47	0.71	0.37	0.3	0.46	0.57	0.46	0.68	-0.22	8.22	-0.2	7.12
ENSMUSG00000021902	chr14:31240859:31240983:-@chr14:31240274:31240433:-@chr14:31239631:31239737:-	0.87	0.71	0.98	0.7	0.33	0.98	0.87	0.71	0.98	0.41	0.18	0.73	0.17	0.65	0.46	14.61
ENSMUSG00000029735	chr6:43488875:43488970:-@chr6:43469002:43469148:-@chr6:43423621:43423732:-	0.88	0.71	0.99	0.76	0.44	0.95	0.88	0.71	0.99	0.44	0.23	0.72	0.12	0.44	0.44	14.58
ENSMUSG00000030322	chr6:115848395:115849732:-@chr6:115845543:115845617:-@chr6:115845314:115845448:-	0.29	0.13	0.52	0.78	0.34	0.99	0.29	0.13	0.52	0.72	0.38	0.95	-0.49	4.44	-0.43	10.4
ENSMUSG00000056260	chr3:106684987:106685133:+@chr3:106731663:106733142:+@chr3:106734358:106734639:+	0.81	0.71	0.91	0.56	0.42	0.73	0.81	0.71	0.91	0.56	0.43	0.72	0.25	6.79	0.25	7.09
ENSMUSG00000034813	chr10:119978438:119978607:+@chr10:119985474:119986484:+@chr10:119999752:119999938:+	0.81	0.5	0.99	0.29	0.09	0.7	0.81	0.5	0.99	0.62	0.23	0.97	0.52	12.65	0.19	0.93
NA	chr8:43180541:43180612:+@chr8:43182342:43182357:+@chr8:43183122:43183365:+	0.15	0.06	0.27	0.46	0.26	0.67	0.15	0.06	0.27	0.4	0.22	0.6	-0.31	10.68	-0.25	2.81
ENSMUSG00000058486	chr6:34910697:34910876:-@chr6:34909677:34909827:-@chr6:34909361:34909540:-	0.22	0.09	0.41	0.56	0.29	0.81	0.22	0.09	0.41	0.71	0.38	0.99	-0.34	4.34	-0.49	9.13
ENSMUSG00000064215	chr12:103436563:103436682:+@chr12:103437450:103437524:+@chr12:103437676:103437705:+	0.5	0.35	0.68	0.86	0.65	0.98	0.5	0.35	0.68	0.69	0.49	0.87	-0.36	12.37	-0.19	0.86
NA	chr11:18884387:18884476:-@chr11:18883988:18884082:-@chr11:18880428:18881922:-	0.88	0.67	1	0.74	0.42	0.98	0.88	0.67	1	0.48	0.2	0.77	0.14	0.54	0.4	12.6
ENSMUSG00000059439	chr11:85801785:85801952:+@chr11:85814000:85814065:+@chr11:85822022:85822112:+	0.36	0.12	0.65	0.87	0.52	1	0.36	0.12	0.65	0.45	0.22	0.73	-0.51	12.42	-0.09	0.54
NA	chr6:29419102:29419383:+@chr6:29419987:29420265:+@chr6:29426625:29426995:+	0.55	0.39	0.73	0.2	0.08	0.38	0.55	0.39	0.73	0.27	0.09	0.52	0.35	10.62	0.28	2.25
ENSMUSG00000026955	chr2:25372321:25372998:+@chr2:25373416:25373517:+@chr2:25374952:25375064:+	0.84	0.67	0.94	0.55	0.3	0.79	0.84	0.67	0.94	0.4	0.14	0.73	0.29	2.01	0.44	10.76
ENSMUSG00000007610	chr8:71490335:71490537:+@chr8:71490655:71490967:+@chr8:71491066:71491209:+	0.61	0.45	0.79	0.27	0.16	0.41	0.61	0.45	0.79	0.55	0.36	0.8	0.34	11.55	0.06	0.44
ENSMUSG00000034593	chr9:75189900:75190000:+@chr9:75192384:75192464:+@chr9:75193939:75194137:+	0.6	0.45	0.74	0.91	0.68	1	0.6	0.45	0.74	0.87	0.71	0.97	-0.31	6.76	-0.27	5.13
ENSMUSG00000046111	chr9:15326075:15326177:-@chr9:15325507:15325746:-@chr9:15324149:15324291:-	0.72	0.62	0.81	0.51	0.38	0.63	0.72	0.62	0.81	0.5	0.38	0.64	0.21	5.75	0.22	6.07
ENSMUSG00000060261	chr5:134274539:134274595:-@chr5:134272524:134272586:-@chr5:134266543:134266656:-	0.72	0.61	0.81	0.36	0.17	0.59	0.72	0.61	0.81	0.58	0.38	0.76	0.36	11.06	0.14	0.54
ENSMUSG00000051705	chr9:59750578:59750649:-@chr9:59739940:59740032:-@chr9:59734259:59737868:-	0.38	0.17	0.61	0.69	0.41	0.9	0.38	0.17	0.61	0.74	0.53	0.9	-0.31	1.67	-0.36	9.9
ENSMUSG00000021451	chr13:51748681:51748919:-@chr13:51734507:51734570:-@chr13:51725224:51725542:-	0.18	0.01	0.46	0.22	0.02	0.66	0.18	0.01	0.46	0.73	0.41	0.97	-0.04	0.47	-0.55	11.1
ENSMUSG00000028549	chr4:99814058:99814100:-@chr4:99802097:99802232:-@chr4:99789601:99789679:-	0.75	0.59	0.9	0.39	0.19	0.67	0.75	0.59	0.9	0.34	0.15	0.72	0.36	5.87	0.41	5.66
ENSMUSG00000003812	chr8:84909257:84909335:+@chr8:84909526:84909690:+@chr8:84909772:84909969:+	0.88	0.71	0.98	0.81	0.6	0.96	0.88	0.71	0.98	0.37	0.13	0.69	0.07	0.31	0.51	10.7
ENSMUSG00000039599	chr14:20375510:20375613:+@chr14:20377775:20377999:+@chr14:20378400:20378523:+	0.9	0.7	1	0.47	0.21	0.86	0.9	0.7	1	0.51	0.25	0.76	0.43	3.16	0.39	7.68
ENSMUSG00000026319	chr1:105691906:105692109:+@chr1:105692212:105692303:+@chr1:105692884:105693177:+	0.93	0.78	0.99	0.59	0.37	0.86	0.93	0.78	0.99	0.6	0.35	0.9	0.34	7.85	0.33	2.73
ENSMUSG00000022629	chr15:90956295:90956509:-@chr15:90952711:90952818:-@chr15:90943765:90943901:-	0.92	0.73	0.99	0.42	0.12	0.77	0.92	0.73	0.99	0.57	0.22	0.89	0.5	8.47	0.35	1.9
ENSMUSG00000049755	chr11:58322600:58322729:-@chr11:58319867:58319954:-@chr11:58319324:58319590:-	0.86	0.63	1	0.65	0.32	0.89	0.86	0.63	1	0.4	0.08	0.8	0.21	0.95	0.46	9.38
ENSMUSG00000028175	chr3:159520830:159520970:+@chr3:159522526:159523356:+@chr3:159523777:159523949:+	0.79	0.7	0.87	0.54	0.41	0.69	0.79	0.7	0.87	0.62	0.47	0.81	0.25	9.14	0.17	1.06
NA	chrX:134717938:134718050:+@chrX:134718370:134718461:+@chrX:134718920:134718992:+	0.62	0.51	0.73	0.34	0.19	0.52	0.62	0.51	0.73	0.43	0.28	0.59	0.28	8.43	0.19	1.55
ENSMUSG00000000753	chr11:75417909:75417996:-@chr11:75416230:75416428:-@chr11:75414921:75415124:-	0.54	0.44	0.65	0.73	0.59	0.88	0.54	0.44	0.65	0.81	0.66	0.96	-0.19	2.16	-0.27	7.61
ENSMUSG00000039678	chr2:30134797:30134870:+@chr2:30135369:30135552:+@chr2:30136673:30136713:+	0.23	0.15	0.34	0.61	0.36	0.82	0.23	0.15	0.34	0.25	0.14	0.42	-0.38	9.51	-0.02	0.21
ENSMUSG00000035401	chr7:98600672:98600827:-@chr7:98599752:98599793:-@chr7:98597033:98597184:-	0.11	0.01	0.3	0.19	0.02	0.5	0.11	0.01	0.3	0.46	0.26	0.69	-0.08	0.33	-0.35	9.38
ENSMUSG00000026924	chr2:26414371:26414445:-@chr2:26413679:26413738:-@chr2:26412836:26412913:-	0.08	0.03	0.18	0.31	0.16	0.49	0.08	0.03	0.18	0.33	0.15	0.56	-0.23	6.76	-0.25	2.74
ENSMUSG00000038437	chr11:97677148:97677236:+@chr11:97678314:97678663:+@chr11:97678965:97679055:+	0.96	0.89	1	0.79	0.63	0.91	0.96	0.89	1	0.7	0.52	0.88	0.17	2.02	0.26	7.44
ENSMUSG00000021224	chr12:83831922:83831996:-@chr12:83825259:83825291:-@chr12:83811286:83811360:-	0.73	0.57	0.88	0.38	0.2	0.58	0.73	0.57	0.88	0.47	0.26	0.68	0.35	7.78	0.26	1.67
ENSMUSG00000039108	chr2:180027900:180028035:+@chr2:180028958:180029074:+@chr2:180031361:180031528:+	0.5	0.4	0.59	0.28	0.16	0.43	0.5	0.4	0.59	0.27	0.16	0.42	0.22	4.34	0.23	4.99
ENSMUSG00000012609	chr12:86020521:86020603:+@chr12:86024220:86024342:+@chr12:86053143:86053760:+	0.81	0.57	0.97	0.49	0.24	0.75	0.81	0.57	0.97	0.42	0.21	0.65	0.32	2.23	0.39	7.08
ENSMUSG00000021451	chr13:51756557:51756802:-@chr13:51734507:51734570:-@chr13:51725224:51725542:-	0.1	0.01	0.3	0.17	0.01	0.65	0.1	0.01	0.3	0.61	0.15	0.9	-0.07	0.32	-0.51	8.99
ENSMUSG00000042097	chr6:117863077:117863142:+@chr6:117866395:117866574:+@chr6:117869218:117869273:+	0.27	0.09	0.55	0.79	0.41	0.98	0.27	0.09	0.55	0.53	0.2	0.87	-0.52	8.22	-0.26	1.07
ENSMUSG00000038677	chr17:28157073:28157189:+@chr17:28158881:28158928:+@chr17:28160812:28160928:+	0.12	0.02	0.36	0.52	0.29	0.77	0.12	0.02	0.36	0.47	0.17	0.78	-0.4	6.83	-0.35	2.44
ENSMUSG00000020459	chr11:29526408:29526487:+@chr11:29526693:29526843:+@chr11:29529929:29530154:+	0.77	0.62	0.9	0.56	0.39	0.75	0.77	0.62	0.9	0.46	0.3	0.63	0.21	1.39	0.31	7.79
ENSMUSG00000019737	chr7:30316573:30316767:+@chr7:30316843:30317091:+@chr7:30317968:30318042:+	0.95	0.86	1	0.66	0.32	0.92	0.95	0.86	1	0.56	0.25	0.88	0.29	2.32	0.39	6.79
NA	chr11:30986112:30986365:-@chr11:30979565:30979600:-@chr11:30976709:30977746:-	0.83	0.61	0.97	0.49	0.14	0.87	0.83	0.61	0.97	0.43	0.2	0.69	0.34	1.41	0.4	7.36
ENSMUSG00000018411	chr11:104302361:104302410:+@chr11:104305313:104305409:+@chr11:104306626:104306758:+	0.48	0.25	0.73	0.17	0.06	0.32	0.48	0.25	0.73	0.23	0.07	0.47	0.31	7.27	0.25	1.5
ENSMUSG00000089872	chr1:190911556:190911770:-@chr1:190904943:190905118:-@chr1:190899451:190899571:-	0.58	0.23	0.94	0.27	0.07	0.62	0.58	0.23	0.94	0.14	0.02	0.48	0.31	1.77	0.44	6.85
ENSMUSG00000033713	chr12:99291237:99291301:-@chr12:99219598:99219663:-@chr12:99209461:99209566:-	0.2	0.09	0.36	0.51	0.25	0.8	0.2	0.09	0.36	0.69	0.37	0.95	-0.31	2.96	-0.49	5.55
ENSMUSG00000022641	chr16:50220445:50220593:-@chr16:50210445:50210534:-@chr16:50209085:50209144:-	0.41	0.27	0.57	0.55	0.36	0.73	0.41	0.27	0.57	0.76	0.53	0.92	-0.14	0.6	-0.35	7.78
ENSMUSG00000023805	chr17:6028419:6028586:+@chr17:6029700:6029834:+@chr17:6032697:6032809:+	0.34	0.15	0.56	0.83	0.48	0.97	0.34	0.15	0.56	0.55	0.23	0.92	-0.49	7.58	-0.21	0.74
ENSMUSG00000040785	chr16:94403314:94403368:+@chr16:94408747:94408901:+@chr16:94409684:94409729:+	0.13	0.04	0.27	0.65	0.26	0.99	0.13	0.04	0.27	0.64	0.1	0.96	-0.52	6.11	-0.51	2.17
ENSMUSG00000002413	chr6:39651605:39651764:-@chr6:39648821:39648856:-@chr6:39648450:39648486:-	0.09	0.01	0.29	0.41	0.06	0.84	0.09	0.01	0.29	0.66	0.22	0.99	-0.32	1.08	-0.57	6.99
ENSMUSG00000036026	chr17:45685916:45686137:-@chr17:45680588:45680641:-@chr17:45679532:45679714:-	0.14	0.02	0.4	0.51	0.22	0.85	0.14	0.02	0.4	0.43	0.06	0.97	-0.37	7.24	-0.29	0.82
ENSMUSG00000049916	chr16:17124990:17125106:-@chr16:17123512:17123654:-@chr16:17121296:17121551:-	0.32	0.24	0.4	0.51	0.32	0.69	0.32	0.24	0.4	0.67	0.43	0.9	-0.19	1.25	-0.35	6.78
ENSMUSG00000035778	chr2:35416472:35416507:-@chr2:35414219:35414284:-@chr2:35413326:35413427:-	0.47	0.34	0.62	0.74	0.58	0.87	0.47	0.34	0.62	0.73	0.57	0.88	-0.27	4	-0.26	4.03
ENSMUSG00000018809	chr11:75349669:75349814:+@chr11:75382250:75382394:+@chr11:75387411:75387500:+	0.67	0.53	0.8	0.9	0.66	0.99	0.67	0.53	0.8	0.92	0.76	1	-0.23	2.09	-0.25	5.71
ENSMUSG00000026017	chr1:60105311:60105434:+@chr1:60108083:60108200:+@chr1:60109327:60109449:+	0.4	0.12	0.86	0.76	0.34	0.98	0.4	0.12	0.86	0.89	0.63	1	-0.36	1.54	-0.49	6.24
ENSMUSG00000024219	chr17:27976561:27976717:+@chr17:27978427:27978489:+@chr17:27985066:27985362:+	0.15	0.01	0.44	0.56	0.29	0.85	0.15	0.01	0.44	0.55	0.25	0.85	-0.41	4.02	-0.4	3.74
NA	chrX:135742692:135742978:+@chrX:135743442:135743522:+@chrX:135744499:135744575:+	0.28	0.12	0.51	0.58	0.31	0.83	0.28	0.12	0.51	0.65	0.42	0.88	-0.3	2.27	-0.37	5.46
ENSMUSG00000035776	chrX:71450611:71450673:-@chrX:71449939:71450007:-@chrX:71441074:71441145:-	0.59	0.38	0.81	0.81	0.54	0.96	0.59	0.38	0.81	0.93	0.79	0.99	-0.22	1.16	-0.34	6.57
ENSMUSG00000025902	chr1:4493772:4493863:-@chr1:4493100:4493490:-@chr1:4490928:4492668:-	0.78	0.56	0.95	0.68	0.41	0.94	0.78	0.56	0.95	0.39	0.19	0.62	0.1	0.55	0.39	7.18
ENSMUSG00000059820	chr9:50617228:50617464:-@chr9:50616658:50616684:-@chr9:50615483:50615559:-	0.14	0.06	0.26	0.23	0.09	0.43	0.14	0.06	0.26	0.48	0.26	0.7	-0.09	0.36	-0.34	7.24
NA	chr8:71928202:71928328:+@chr8:71929138:71929198:+@chr8:71932019:71934630:+	0.53	0.4	0.7	0.77	0.58	0.95	0.53	0.4	0.7	0.83	0.63	0.96	-0.24	2.27	-0.3	5.3
ENSMUSG00000029505	chr5:110701621:110701790:-@chr5:110700522:110700764:-@chr5:110698752:110698916:-	0.5	0.33	0.7	0.2	0.08	0.36	0.5	0.33	0.7	0.36	0.19	0.59	0.3	6.87	0.14	0.66
NA	chr5:41794227:41794380:-@chr5:41791797:41791937:-@chr5:41787540:41788949:-	0.58	0.48	0.68	0.36	0.22	0.51	0.58	0.48	0.68	0.35	0.21	0.49	0.22	2.83	0.23	4.52
ENSMUSG00000048997	chr3:108210345:108210934:-@chr3:108208917:108209095:-@chr3:108208440:108208505:-	0.4	0.24	0.6	0.63	0.19	0.92	0.4	0.24	0.6	0.81	0.48	0.98	-0.23	1.15	-0.41	6.18
ENSMUSG00000035365	chr10:88146852:88146878:-@chr10:88146496:88146648:-@chr10:88143940:88144095:-	0.92	0.78	0.99	0.58	0.36	0.82	0.92	0.78	0.99	0.75	0.52	0.93	0.34	6.65	0.17	0.67
NA	chr9:58201280:58201372:-@chr9:58200272:58200461:-@chr9:58196297:58199983:-	0.64	0.33	0.9	0.16	0.02	0.48	0.64	0.33	0.9	0.46	0.15	0.81	0.48	6.41	0.18	0.9
NA	chr7:6373127:6373253:+@chr7:6375519:6375614:+@chr7:6378209:6382605:+	0.72	0.45	0.94	0.28	0.07	0.55	0.72	0.45	0.94	0.59	0.26	0.87	0.44	6.68	0.13	0.62
ENSMUSG00000032827	chr6:5057458:5057578:+@chr6:5062118:5062192:+@chr6:5063991:5064095:+	0.05	0	0.19	0.46	0.17	0.77	0.05	0	0.19	0.33	0.11	0.67	-0.41	4.82	-0.28	2.4
ENSMUSG00000072214	chr16:18624111:18624212:-@chr16:18623321:18623453:-@chr16:18623105:18623240:-	0.75	0.52	0.94	0.27	0.1	0.61	0.75	0.52	0.94	0.78	0.49	1	0.48	6.7	-0.03	0.46
ENSMUSG00000060261	chr5:134311673:134312022:-@chr5:134306532:134306727:-@chr5:134295510:134295613:-	0.9	0.63	1	0.36	0.1	0.81	0.9	0.63	1	0.74	0.31	0.98	0.54	6.62	0.16	0.49
ENSMUSG00000020696	chr11:82812400:82812810:-@chr11:82811028:82811111:-@chr11:82810008:82810218:-	0.66	0.5	0.8	0.81	0.66	0.93	0.66	0.5	0.8	0.92	0.79	1	-0.15	0.67	-0.26	6.42
ENSMUSG00000040712	chr11:70683890:70684025:-@chr11:70683279:70683350:-@chr11:70682894:70683047:-	0.79	0.48	0.97	0.38	0.19	0.63	0.79	0.48	0.97	0.7	0.36	0.97	0.41	6.42	0.09	0.66
ENSMUSG00000018395	chr11:53586835:53586930:+@chr11:53590717:53590725:+@chr11:53593374:53593530:+	0.81	0.56	0.95	0.45	0.17	0.72	0.81	0.56	0.95	0.46	0.22	0.74	0.36	2.81	0.35	4.12
ENSMUSG00000079179	chr12:3238029:3238112:+@chr12:3238834:3239009:+@chr12:3241522:3241578:+	0.76	0.57	0.92	0.54	0.32	0.76	0.76	0.57	0.92	0.43	0.24	0.65	0.22	1.06	0.33	5.8
ENSMUSG00000028842	chr4:126404205:126404413:-@chr4:126403165:126403301:-@chr4:126376907:126377041:-	0.27	0.09	0.57	0.79	0.42	0.99	0.27	0.09	0.57	0.58	0.28	0.88	-0.52	5.54	-0.31	1.22
ENSMUSG00000003190	chr7:44994363:44994449:-@chr7:44993811:44994271:-@chr7:44992744:44993031:-	0.91	0.77	0.99	0.44	0.23	0.81	0.91	0.77	0.99	0.86	0.58	0.98	0.47	6.48	0.05	0.25
ENSMUSG00000054387	chr1:133009137:133009192:-@chr1:133004654:133004721:-@chr1:133003791:133003890:-	0.59	0.5	0.68	0.39	0.25	0.54	0.59	0.5	0.68	0.35	0.22	0.51	0.2	2.38	0.24	4.33
NA	chr9:58201280:58201372:-@chr9:58200272:58200443:-@chr9:58196297:58199983:-	0.61	0.27	0.9	0.15	0.04	0.38	0.61	0.27	0.9	0.58	0.23	0.94	0.46	6.03	0.03	0.65
ENSMUSG00000021706	chr13:92519467:92519563:-@chr13:92516531:92516692:-@chr13:92513787:92513929:-	0.93	0.79	1	0.68	0.48	0.87	0.93	0.79	1	0.65	0.4	0.91	0.25	4.64	0.28	1.96
ENSMUSG00000058318	chr2:92184182:92184352:+@chr2:92187044:92187408:+@chr2:92214049:92214089:+	0.56	0.31	0.87	0.2	0.06	0.47	0.56	0.31	0.87	0.22	0.09	0.43	0.36	3.81	0.34	2.71
ENSMUSG00000053070	chr9:8037460:8037535:-@chr9:8023900:8023966:-@chr9:8021672:8022544:-	0.67	0.43	0.94	0.23	0.04	0.6	0.67	0.43	0.94	0.32	0.07	0.65	0.44	4.48	0.35	1.98
ENSMUSG00000055762	chr15:75909245:75909340:-@chr15:75905886:75905900:-@chr15:75902679:75903808:-	0.81	0.46	0.97	0.46	0.06	0.86	0.81	0.46	0.97	0.25	0.03	0.73	0.35	1.34	0.56	5.12
ENSMUSG00000063889	chr18:3295040:3295182:-@chr18:3276694:3276729:-@chr18:3273422:3273578:-	0.33	0.13	0.57	0.76	0.4	0.98	0.33	0.13	0.57	0.61	0.28	0.91	-0.43	5.09	-0.28	1.23
ENSMUSG00000038271	chr6:125151385:125151525:+@chr6:125151795:125152771:+@chr6:125153042:125153162:+	0.52	0.29	0.94	0.17	0.08	0.33	0.52	0.29	0.94	0.43	0.22	0.74	0.35	5.66	0.09	0.51
ENSMUSG00000040621	chrX:166170480:166170550:+@chrX:166176845:166177079:+@chrX:166178792:166178830:+	0.45	0.25	0.68	0.09	0.01	0.37	0.45	0.25	0.68	0.2	0.02	0.52	0.36	4.89	0.25	1.27
NA	chr6:29417932:29418153:+@chr6:29419102:29419383:+@chr6:29426625:29426995:+	0.35	0.23	0.49	0.12	0.03	0.23	0.35	0.23	0.49	0.17	0.07	0.33	0.23	4.5	0.18	1.63
ENSMUSG00000033697	chr15:76734877:76735438:-@chr15:76730364:76730456:-@chr15:76727403:76727476:-	0.48	0.33	0.67	0.72	0.56	0.9	0.48	0.33	0.67	0.81	0.56	0.96	-0.24	1.9	-0.33	4.22
ENSMUSG00000056260	chr3:106731663:106733142:+@chr3:106733337:106733606:+@chr3:106734358:106734639:+	0.32	0.22	0.42	0.58	0.36	0.79	0.32	0.22	0.42	0.59	0.42	0.78	-0.26	2.1	-0.27	3.98
NA	chr18:80738653:80738856:-@chr18:80736812:80736844:-@chr18:80734141:80736149:-	0.3	0.18	0.42	0.52	0.36	0.68	0.3	0.18	0.42	0.54	0.38	0.69	-0.22	1.82	-0.24	4.26
ENSMUSG00000058486	chr6:34910697:34910876:-@chr6:34909714:34909827:-@chr6:34909361:34909540:-	0.15	0.03	0.37	0.51	0.24	0.79	0.15	0.03	0.37	0.58	0.2	0.9	-0.36	3.3	-0.43	2.76
ENSMUSG00000025902	chr1:4493772:4493863:-@chr1:4493100:4493466:-@chr1:4490928:4492668:-	0.82	0.62	0.98	0.73	0.46	0.96	0.82	0.62	0.98	0.4	0.19	0.67	0.09	0.55	0.42	5.5
ENSMUSG00000042708	chr1:153445798:153445951:+@chr1:153447724:153447974:+@chr1:153448901:153449023:+	0.35	0.09	0.7	0.83	0.52	0.98	0.35	0.09	0.7	0.7	0.32	0.97	-0.48	4.3	-0.35	1.66
ENSMUSG00000007476,ENSMUSG00000079484	chr2:30269689:30269847:+@chr2:30274470:30274723:+@chr2:30279955:30280083:+	0.36	0.17	0.6	0.75	0.43	0.99	0.36	0.17	0.6	0.71	0.33	1	-0.39	4.59	-0.35	1.26
NA	chr1:36558016:36558381:-@chr1:36556803:36556929:-@chr1:36555932:36556080:-	0.16	0.01	0.51	0.58	0.21	0.98	0.16	0.01	0.51	0.64	0.21	0.92	-0.42	2.38	-0.48	3.45
NA	chr11:20543253:20543760:+@chr11:20595130:20595214:+@chr11:20647802:20653023:+	0.11	0.04	0.23	0.45	0.2	0.74	0.11	0.04	0.23	0.3	0.11	0.54	-0.34	4.95	-0.19	0.84
ENSMUSG00000027646	chr2:157424293:157424414:+@chr2:157424828:157424935:+@chr2:157439201:157439277:+	0.12	0.03	0.26	0.51	0.22	0.81	0.12	0.03	0.26	0.14	0.02	0.32	-0.39	5.47	-0.02	0.25
ENSMUSG00000002546	chr2:32292093:32292215:+@chr2:32293315:32293395:+@chr2:32296965:32297008:+	0.23	0.06	0.58	0.49	0.08	0.97	0.23	0.06	0.58	0.75	0.38	0.96	-0.26	0.95	-0.52	4.75
ENSMUSG00000026135	chr1:74585384:74585697:-@chr1:74579325:74579927:-@chr1:74578123:74578287:-	0.73	0.58	0.87	0.39	0.22	0.63	0.73	0.58	0.87	0.67	0.44	0.93	0.34	5.23	0.06	0.44
ENSMUSG00000052752	chr17:24516505:24516599:-@chr17:24514713:24514866:-@chr17:24514125:24514217:-	0.81	0.69	0.89	0.59	0.45	0.73	0.81	0.69	0.89	0.62	0.46	0.78	0.22	4.07	0.19	1.44
ENSMUSG00000048402	chr1:118890296:118890401:-@chr1:118867979:118868181:-@chr1:118866572:118866757:-	0.89	0.67	0.99	0.88	0.7	0.99	0.89	0.67	0.99	0.45	0.2	0.74	0.01	0.25	0.44	5.24
ENSMUSG00000032198	chr9:21829474:21829578:-@chr9:21825783:21825875:-@chr9:21825435:21825530:-	0.87	0.72	0.95	0.62	0.39	0.85	0.87	0.72	0.95	0.59	0.36	0.81	0.25	1.36	0.28	4.09
ENSMUSG00000019817	chr10:13112519:13112550:+@chr10:13114158:13114220:+@chr10:13116696:13116781:+	0.23	0.02	0.69	0.5	0.13	0.91	0.23	0.02	0.69	0.72	0.3	0.93	-0.27	1.14	-0.49	4.27
ENSMUSG00000025075	chr19:56298015:56298051:+@chr19:56306773:56306883:+@chr19:56308837:56308944:+	0.44	0.17	0.72	0.73	0.42	0.97	0.44	0.17	0.72	0.81	0.56	0.98	-0.29	1.59	-0.37	3.79
ENSMUSG00000042787	chr9:119444923:119445150:+@chr9:119445688:119445801:+@chr9:119446949:119447098:+	0.27	0.14	0.46	0.48	0.16	0.91	0.27	0.14	0.46	0.7	0.36	1	-0.21	0.74	-0.43	4.64
ENSMUSG00000032525	chr9:121731478:121731565:+@chr9:121738388:121738415:+@chr9:121741122:121741151:+	0.07	0.01	0.19	0.17	0.03	0.4	0.07	0.01	0.19	0.48	0.13	0.77	-0.1	0.32	-0.41	5.02
ENSMUSG00000059890	chr9:44965485:44965600:-@chr9:44963364:44963432:-@chr9:44959979:44960139:-	0.47	0.33	0.64	0.75	0.6	0.88	0.47	0.33	0.64	0.61	0.42	0.79	-0.28	4.72	-0.14	0.57
ENSMUSG00000028402	chr4:81317594:81317704:-@chr4:81313500:81313598:-@chr4:81310157:81310319:-	0.77	0.4	1	0.34	0.01	0.8	0.77	0.4	1	0.33	0.12	0.67	0.43	2.55	0.44	2.72
ENSMUSG00000035506	chr16:33608145:33608232:+@chr16:33617108:33617254:+@chr16:33624554:33625175:+	0.81	0.66	0.92	0.65	0.33	0.95	0.81	0.66	0.92	0.39	0.08	0.73	0.16	0.57	0.42	4.65
ENSMUSG00000027333	chr2:131520095:131520268:+@chr2:131520922:131521171:+@chr2:131524743:131525183:+	0.85	0.61	0.99	0.65	0.38	0.91	0.85	0.61	0.99	0.47	0.24	0.74	0.2	0.85	0.38	4.34
ENSMUSG00000017843	chr12:110574745:110574861:+@chr12:110578101:110578168:+@chr12:110580401:110583061:+	0.15	0.05	0.29	0.27	0.13	0.45	0.15	0.05	0.29	0.44	0.25	0.68	-0.12	0.52	-0.29	4.64
ENSMUSG00000035696	chr4:44167627:44168005:-@chr4:44158903:44159052:-@chr4:44152360:44152553:-	0.23	0.1	0.4	0.53	0.29	0.8	0.23	0.1	0.4	0.54	0.27	0.81	-0.3	2.03	-0.31	3.08
NA	chr17:21650611:21650872:+@chr17:21651803:21651898:+@chr17:21652267:21652345:+	0.19	0.01	0.63	0.56	0.19	0.94	0.19	0.01	0.63	0.59	0.15	0.94	-0.37	2.6	-0.4	2.39
ENSMUSG00000064105	chr19:46868538:46868631:+@chr19:46871656:46871721:+@chr19:46877208:46877392:+	0.41	0.28	0.54	0.68	0.47	0.85	0.41	0.28	0.54	0.64	0.44	0.8	-0.27	3.1	-0.23	1.88
NA	chr19:55925977:55926049:+@chr19:55926684:55926756:+@chr19:55931434:55933655:+	0.15	0.03	0.49	0.56	0.29	0.98	0.15	0.03	0.49	0.25	0.03	0.61	-0.41	4.54	-0.1	0.43
ENSMUSG00000017801	chr11:101087754:101087790:+@chr11:101088236:101088325:+@chr11:101088598:101088704:+	0.92	0.81	0.98	0.72	0.57	0.85	0.92	0.81	0.98	0.71	0.53	0.85	0.2	2.81	0.21	2.15
ENSMUSG00000031441	chr8:12859314:12859479:+@chr8:12861640:12861724:+@chr8:12861912:12862205:+	0.2	0.06	0.39	0.66	0.29	0.97	0.2	0.06	0.39	0.43	0.13	0.79	-0.46	4.17	-0.23	0.77
ENSMUSG00000071454	chr12:3773551:3773640:+@chr12:3774570:3774610:+@chr12:3779619:3779654:+	0.12	0.05	0.22	0.38	0.18	0.59	0.12	0.05	0.22	0.34	0.13	0.6	-0.26	3.59	-0.22	1.35
ENSMUSG00000051169	chr6:113418810:113418949:-@chr6:113417847:113417946:-@chr6:113417304:113417411:-	0.79	0.54	0.96	0.41	0.18	0.78	0.79	0.54	0.96	0.53	0.17	0.89	0.38	3.93	0.26	0.99
ENSMUSG00000028456	chr4:43115103:43115160:+@chr4:43161443:43161478:+@chr4:43165744:43165978:+	0.22	0.04	0.48	0.6	0.17	0.96	0.22	0.04	0.48	0.64	0.23	0.96	-0.38	1.76	-0.42	3.14
ENSMUSG00000021846	chr14:48120869:48121233:+@chr14:48168197:48168326:+@chr14:48240210:48240311:+	0.9	0.71	0.99	0.66	0.41	0.88	0.9	0.71	0.99	0.62	0.34	0.85	0.24	1.47	0.28	3.43
NA	chrX:142681400:142681556:+@chrX:142682291:142682949:+@chrX:142752040:142752089:+	0.84	0.64	0.97	0.59	0.32	0.83	0.84	0.64	0.97	0.49	0.25	0.76	0.25	1.17	0.35	3.66
NA	chr4:4138635:4138815:-@chr4:4138006:4138145:-@chr4:4133536:4134507:-	0.64	0.29	0.93	0.61	0.18	0.99	0.64	0.29	0.93	0.15	0.01	0.53	0.03	1.07	0.49	3.75
ENSMUSG00000031860	chr8:69859080:69859153:+@chr8:69866468:69866603:+@chr8:69870578:69870684:+	0.64	0.31	0.95	0.64	0.26	0.93	0.64	0.31	0.95	0.13	0.02	0.54	0	0.69	0.51	4.12
ENSMUSG00000028438	chr4:41464710:41464848:-@chr4:41429267:41429411:-@chr4:41428345:41428982:-	0.52	0.31	0.78	0.37	0.13	0.63	0.52	0.31	0.78	0.15	0.02	0.46	0.15	0.6	0.37	4.2
ENSMUSG00000035696	chr4:44167466:44167648:-@chr4:44158903:44159052:-@chr4:44152360:44152553:-	0.19	0.08	0.35	0.49	0.24	0.79	0.19	0.08	0.35	0.54	0.26	0.85	-0.3	2.39	-0.35	2.38
ENSMUSG00000037426	chr5:32863721:32863821:+@chr5:32864158:32864312:+@chr5:32864577:32864699:+	0.63	0.47	0.78	0.86	0.59	0.99	0.63	0.47	0.78	0.91	0.73	0.99	-0.23	2.09	-0.28	2.68
ENSMUSG00000024236	chr18:4920540:4920874:+@chr18:4971090:4971197:+@chr18:5037108:5037165:+	0.38	0.18	0.63	0.77	0.48	0.96	0.38	0.18	0.63	0.5	0.22	0.83	-0.39	4.07	-0.12	0.68
ENSMUSG00000029848	chr6:34920637:34921054:+@chr6:34927719:34927916:+@chr6:34930361:34930436:+	0.74	0.34	1	0.26	0.06	0.6	0.74	0.34	1	0.43	0.08	0.81	0.48	3.45	0.31	1.23
ENSMUSG00000034940	chr11:83982196:83982307:+@chr11:83985249:83985551:+@chr11:83987913:83987990:+	0.69	0.46	0.92	0.47	0.17	0.9	0.69	0.46	0.92	0.33	0.15	0.57	0.22	1.17	0.36	3.46
ENSMUSG00000028106	chr3:95787284:95787384:-@chr3:95786320:95786451:-@chr3:95785054:95785106:-	0.35	0.22	0.51	0.5	0.29	0.79	0.35	0.22	0.51	0.66	0.44	0.94	-0.15	0.59	-0.31	4.01
ENSMUSG00000092260	chr8:69744461:69744587:-@chr8:69744192:69744252:-@chr8:69742859:69743269:-	0.81	0.53	0.99	0.8	0.45	0.99	0.81	0.53	0.99	0.39	0.14	0.73	0.01	0.47	0.42	4.09
ENSMUSG00000024958	chr19:6940352:6940482:-@chr19:6939529:6939754:-@chr19:6939261:6939410:-	0.55	0.37	0.72	0.4	0.24	0.58	0.55	0.37	0.72	0.26	0.09	0.45	0.15	0.66	0.29	3.89
ENSMUSG00000033713	chr12:99291237:99291301:-@chr12:99219601:99219663:-@chr12:99209461:99209566:-	0.15	0.06	0.28	0.32	0.04	0.58	0.15	0.06	0.28	0.53	0.2	0.82	-0.17	0.74	-0.38	3.77
ENSMUSG00000046169	chr13:104399943:104400006:+@chr13:104413708:104413810:+@chr13:104426935:104427068:+	0.41	0.18	0.69	0.72	0.34	0.94	0.41	0.18	0.69	0.8	0.49	0.99	-0.31	1.27	-0.39	3.23
ENSMUSG00000030849	chr7:130218998:130219121:-@chr7:130200983:130201173:-@chr7:130196178:130196374:-	0.92	0.73	0.99	0.6	0.32	0.87	0.92	0.73	0.99	0.65	0.38	0.9	0.32	3.05	0.27	1.45
ENSMUSG00000022679	chr16:13940695:13941023:+@chr16:13942120:13942173:+@chr16:13944666:13944736:+	0.12	0.01	0.32	0.35	0.03	0.74	0.12	0.01	0.32	0.6	0.14	0.93	-0.23	0.75	-0.48	3.7
ENSMUSG00000039005	chr4:66827811:66827921:+@chr4:66833894:66834060:+@chr4:66839229:66842796:+	0.38	0.06	0.81	0.81	0.51	0.98	0.38	0.06	0.81	0.67	0.17	0.98	-0.43	3.52	-0.29	0.91
ENSMUSG00000040785	chr16:94403314:94403368:+@chr16:94408554:94408716:+@chr16:94409684:94409729:+	0.63	0.46	0.8	0.88	0.68	0.99	0.63	0.46	0.8	0.85	0.63	0.98	-0.25	2.68	-0.22	1.74
ENSMUSG00000005899	chr16:17619354:17619434:+@chr16:17620586:17620630:+@chr16:17620712:17620762:+	0.23	0.05	0.54	0.67	0.29	0.98	0.23	0.05	0.54	0.5	0.28	0.74	-0.44	2.96	-0.27	1.43
ENSMUSG00000025646	chr9:109061110:109061201:-@chr9:109060629:109060709:-@chr9:109060263:109060512:-	0.84	0.55	1	0.77	0.43	0.97	0.84	0.55	1	0.32	0.03	0.85	0.07	0.5	0.52	3.86
ENSMUSG00000059474	chr11:93886219:93886416:+@chr11:93891339:93891388:+@chr11:93905159:93905358:+	0.27	0.15	0.42	0.43	0.24	0.65	0.27	0.15	0.42	0.66	0.31	0.98	-0.16	0.64	-0.39	3.71
ENSMUSG00000049606	chr5:106696532:106696830:-@chr5:106690671:106690877:-@chr5:106681904:106682013:-	0.64	0.32	0.94	0.44	0.15	0.89	0.64	0.32	0.94	0.19	0.02	0.68	0.2	1.06	0.45	3.26
ENSMUSG00000058486	chr6:34910510:34910662:-@chr6:34909677:34909827:-@chr6:34909361:34909540:-	0.43	0.16	0.92	0.86	0.64	0.99	0.43	0.16	0.92	0.62	0.24	0.95	-0.43	3.41	-0.19	0.9
NA	chr7:3502432:3502552:-@chr7:3498196:3498231:-@chr7:3497425:3497715:-	0.74	0.28	0.97	0.79	0.4	0.99	0.74	0.28	0.97	0.23	0.01	0.73	-0.05	0.66	0.51	3.65
ENSMUSG00000042446	chr4:126910790:126911002:-@chr4:126906521:126906636:-@chr4:126905872:126906147:-	0.71	0.56	0.86	0.59	0.4	0.78	0.71	0.56	0.86	0.43	0.25	0.66	0.12	0.51	0.28	3.79
ENSMUSG00000005968	chr3:94658725:94658806:-@chr3:94639387:94639469:-@chr3:94638925:94639026:-	0.35	0.19	0.54	0.68	0.38	0.92	0.35	0.19	0.54	0.64	0.3	0.93	-0.33	2.99	-0.29	1.3
ENSMUSG00000048924	chr13:100693537:100693708:+@chr13:100694370:100694500:+@chr13:100696111:100697240:+	0.89	0.6	0.99	0.78	0.49	0.98	0.89	0.6	0.99	0.43	0.1	0.81	0.11	0.54	0.46	3.7
ENSMUSG00000039607	chr9:116586018:116586095:-@chr9:116582738:116582865:-@chr9:116572747:116578702:-	0.56	0.32	0.8	0.9	0.65	1	0.56	0.32	0.8	0.76	0.43	0.97	-0.34	3.23	-0.2	0.96
ENSMUSG00000028898	chr4:132329353:132329538:-@chr4:132328469:132328566:-@chr4:132325208:132325260:-	0.64	0.45	0.83	0.9	0.75	0.98	0.64	0.45	0.83	0.84	0.68	0.96	-0.26	3.19	-0.2	1
ENSMUSG00000047766	chr9:60685035:60685122:-@chr9:60680505:60680702:-@chr9:60680069:60680171:-	0.8	0.47	0.99	0.42	0.17	0.77	0.8	0.47	0.99	0.47	0.16	0.85	0.38	2.73	0.33	1.45
ENSMUSG00000030281	chr6:113474161:113474272:+@chr6:113474553:113474597:+@chr6:113476399:113476538:+	0.58	0.36	0.83	0.18	0.01	0.65	0.58	0.36	0.83	0.49	0.16	0.84	0.4	3.47	0.09	0.68
ENSMUSG00000000085	chr4:120453752:120453775:+@chr4:120456285:120456509:+@chr4:120462013:120462155:+	0.24	0.11	0.52	0.51	0.12	0.97	0.24	0.11	0.52	0.68	0.27	0.95	-0.27	1.06	-0.44	3.07
ENSMUSG00000026017	chr1:60098281:60098307:+@chr1:60102627:60102784:+@chr1:60105311:60105434:+	0.08	0.01	0.24	0.35	0.13	0.74	0.08	0.01	0.24	0.48	0.14	0.83	-0.27	1.42	-0.4	2.68
ENSMUSG00000047454	chr12:78492038:78492310:+@chr12:78493950:78494057:+@chr12:78504617:78504751:+	0.87	0.61	0.99	0.55	0.21	0.87	0.87	0.61	0.99	0.48	0.15	0.85	0.32	1.47	0.39	2.62
ENSMUSG00000057530	chr4:137862237:137862381:+@chr4:137905070:137905155:+@chr4:137913768:137913854:+	0.33	0.1	0.58	0.07	0	0.26	0.33	0.1	0.58	0.15	0.01	0.47	0.26	3.23	0.18	0.86
ENSMUSG00000020821	chr11:70700548:70700709:+@chr11:70702446:70702551:+@chr11:70702772:70702905:+	0.28	0.15	0.44	0.43	0.26	0.63	0.28	0.15	0.44	0.57	0.36	0.78	-0.15	0.59	-0.29	3.5
ENSMUSG00000023206	chr2:11718264:11718458:+@chr2:11720013:11720105:+@chr2:11723413:11723610:+	0.26	0.01	0.82	0.73	0.3	0.96	0.26	0.01	0.82	0.69	0.11	0.99	-0.47	1.88	-0.43	2.19
ENSMUSG00000040268	chr7:130908336:130908425:+@chr7:130909588:130909628:+@chr7:130910832:130913302:+	0.31	0.2	0.44	0.41	0.2	0.63	0.31	0.2	0.44	0.65	0.4	0.92	-0.1	0.41	-0.34	3.65
ENSMUSG00000006019	chr7:16212809:16213026:-@chr7:16210514:16210688:-@chr7:16205988:16206181:-	0.83	0.63	0.96	0.35	0.03	0.83	0.83	0.63	0.96	0.64	0.19	0.94	0.48	3.39	0.19	0.65
ENSMUSG00000035696	chr4:44168243:44168283:-@chr4:44158903:44159052:-@chr4:44152360:44152553:-	0.11	0.05	0.19	0.38	0.17	0.77	0.11	0.05	0.19	0.27	0.14	0.48	-0.27	2.79	-0.16	1.25
ENSMUSG00000032855	chr17:24591287:24591481:+@chr17:24591838:24591977:+@chr17:24592611:24592723:+	0.92	0.69	0.99	0.6	0.34	0.9	0.92	0.69	0.99	0.76	0.49	0.95	0.32	3.4	0.16	0.58
ENSMUSG00000036676	chr10:100487162:100487347:-@chr10:100485051:100485125:-@chr10:100477805:100478022:-	0.24	0.13	0.37	0.46	0.26	0.67	0.24	0.13	0.37	0.52	0.29	0.72	-0.22	1.41	-0.28	2.56
ENSMUSG00000087159	chrX:169320622:169320697:+@chrX:169321755:169321833:+@chrX:169322750:169322842:+	0.81	0.51	0.98	0.43	0.08	0.81	0.81	0.51	0.98	0.34	0.03	0.9	0.38	1.28	0.47	2.67
ENSMUSG00000002608	chr7:25718918:25719053:-@chr7:25718145:25718279:-@chr7:25716854:25716999:-	0.48	0.31	0.67	0.8	0.5	0.99	0.48	0.31	0.67	0.76	0.46	0.97	-0.32	2.22	-0.28	1.73
ENSMUSG00000028995	chr5:23979488:23979647:-@chr5:23966134:23966431:-@chr5:23960936:23965358:-	0.46	0.32	0.62	0.76	0.53	0.95	0.46	0.32	0.62	0.6	0.43	0.76	-0.3	3.35	-0.14	0.6
ENSMUSG00000051705	chr9:59750262:59750371:-@chr9:59739940:59740032:-@chr9:59734259:59737868:-	0.44	0.22	0.64	0.72	0.44	0.93	0.44	0.22	0.64	0.76	0.5	0.94	-0.28	1.8	-0.32	2.14
ENSMUSG00000020385	chr11:51268165:51268231:+@chr11:51268769:51268846:+@chr11:51270537:51270595:+	0.19	0.01	0.59	0.56	0.22	0.93	0.19	0.01	0.59	0.52	0.19	0.87	-0.37	2.16	-0.33	1.76
ENSMUSG00000059439	chr11:85801785:85801952:+@chr11:85814000:85814065:+@chr11:85825202:85826058:+	0.18	0.07	0.31	0.4	0.2	0.61	0.18	0.07	0.31	0.51	0.22	0.77	-0.22	1.74	-0.33	2.18
ENSMUSG00000030281	chr6:113474161:113474272:+@chr6:113474553:113474597:+@chr6:113476426:113476538:+	0.75	0.37	0.98	0.33	0.04	0.86	0.75	0.37	0.98	0.64	0.17	0.98	0.42	2.83	0.11	1.02
ENSMUSG00000058835	chr2:22957018:22957118:-@chr2:22950184:22950270:-@chr2:22946576:22946761:-	0.83	0.63	0.95	0.62	0.43	0.82	0.83	0.63	0.95	0.57	0.4	0.72	0.21	1.17	0.26	2.68
ENSMUSG00000041977	chr3:87733148:87733504:+@chr3:87734424:87734552:+@chr3:87735345:87735571:+	0.36	0.22	0.53	0.7	0.47	0.9	0.36	0.22	0.53	0.43	0.25	0.66	-0.34	3.46	-0.07	0.37
ENSMUSG00000026987	chr2:60001506:60001556:-@chr2:59983782:59983970:-@chr2:59978543:59978707:-	0.57	0.32	0.79	0.22	0.02	0.65	0.57	0.32	0.79	0.29	0.08	0.62	0.35	2.45	0.28	1.37
ENSMUSG00000039853	chr4:46521982:46522144:-@chr4:46510720:46510791:-@chr4:46510437:46510529:-	0.64	0.24	0.95	0.18	0.02	0.56	0.64	0.24	0.95	0.27	0.05	0.67	0.46	2.1	0.37	1.68
NA	chr2:131207078:131207146:+@chr2:131211263:131211473:+@chr2:131212447:131212736:+	0.83	0.59	0.98	0.36	0.08	0.73	0.83	0.59	0.98	0.72	0.38	0.98	0.47	3.24	0.11	0.54
ENSMUSG00000040415	chr10:127195694:127195709:-@chr10:127194682:127194812:-@chr10:127194410:127194473:-	0.64	0.24	0.95	0.18	0.03	0.55	0.64	0.24	0.95	0.57	0.19	0.89	0.46	2.8	0.07	0.95
ENSMUSG00000051586	chr6:120957699:120957793:-@chr6:120953634:120953684:-@chr6:120952375:120952485:-	0.89	0.52	0.99	0.73	0.27	0.98	0.89	0.52	0.99	0.55	0.28	0.8	0.16	0.57	0.34	3.18
ENSMUSG00000026436	chr1:132008099:132008187:+@chr1:132013026:132013234:+@chr1:132014383:132014598:+	0.09	0.01	0.27	0.53	0.19	0.91	0.09	0.01	0.27	0.19	0.05	0.52	-0.44	3.4	-0.1	0.31
ENSMUSG00000059475	chr9:20492386:20492451:-@chr9:20490681:20491482:-@chr9:20486330:20486437:-	0.52	0.24	0.86	0.18	0.07	0.39	0.52	0.24	0.86	0.24	0.11	0.48	0.34	2.44	0.28	1.25
ENSMUSG00000034032	chr2:119787435:119787529:-@chr2:119787221:119787297:-@chr2:119783734:119783970:-	0.16	0.09	0.25	0.41	0.19	0.69	0.16	0.09	0.25	0.45	0.19	0.72	-0.25	1.54	-0.29	2.14
ENSMUSG00000023050	chr15:102516788:102517004:-@chr15:102509919:102510005:-@chr15:102505090:102505568:-	0.74	0.36	0.96	0.33	0.09	0.65	0.74	0.36	0.96	0.68	0.3	0.98	0.41	2.87	0.06	0.81
ENSMUSG00000030254	chr6:112644588:112644747:-@chr6:112628462:112628524:-@chr6:112619851:112620904:-	0.42	0.3	0.53	0.6	0.4	0.76	0.42	0.3	0.53	0.66	0.48	0.82	-0.18	1.11	-0.24	2.57
ENSMUSG00000028849	chr4:126240023:126240137:-@chr4:126238522:126238632:-@chr4:126236896:126237278:-	0.75	0.61	0.88	0.59	0.4	0.78	0.75	0.61	0.88	0.5	0.34	0.67	0.16	0.8	0.25	2.88
ENSMUSG00000026121	chr1:36557360:36557557:-@chr1:36556803:36556929:-@chr1:36555932:36556080:-	0.25	0	0.69	0.57	0.07	0.96	0.25	0	0.69	0.65	0.24	0.99	-0.32	1.71	-0.4	1.95
NA	chr11:116167552:116168178:-@chr11:116167133:116167228:-@chr11:116165832:116165912:-	0.2	0.06	0.4	0.63	0.26	0.93	0.2	0.06	0.4	0.2	0.05	0.46	-0.43	3.29	0	0.37
ENSMUSG00000075256	chr2:79456551:79456636:-@chr2:79449034:79449206:-@chr2:79392943:79393185:-	0.07	0	0.38	0.54	0.12	0.91	0.07	0	0.38	0.22	0.02	0.58	-0.47	3.19	-0.15	0.45
ENSMUSG00000029403	chr5:92017122:92017228:-@chr5:92008965:92009053:-@chr5:92006074:92008134:-	0.41	0.19	0.67	0.71	0.42	0.94	0.41	0.19	0.67	0.72	0.26	0.97	-0.3	2.07	-0.31	1.57
ENSMUSG00000038271	chr6:125151385:125151525:+@chr6:125151795:125151803:+@chr6:125152614:125152771:+	0.59	0.26	0.9	0.21	0.03	0.54	0.59	0.26	0.9	0.38	0.1	0.78	0.38	2.69	0.21	0.93
ENSMUSG00000037426	chr5:32863721:32863821:+@chr5:32864010:32864312:+@chr5:32864577:32864699:+	0.55	0.4	0.69	0.82	0.52	0.99	0.55	0.4	0.69	0.8	0.53	0.96	-0.27	1.41	-0.25	2.19
ENSMUSG00000038369	chr2:155473640:155473894:-@chr2:155449283:155449351:-@chr2:155440688:155440785:-	0.11	0.01	0.37	0.35	0.03	0.8	0.11	0.01	0.37	0.64	0.17	0.98	-0.24	0.69	-0.53	2.89
ENSMUSG00000032076	chr9:47813773:47813945:+@chr9:47818734:47818817:+@chr9:47829377:47829409:+	0.69	0.42	1	0.31	0.07	0.64	0.69	0.42	1	0.37	0.11	0.79	0.38	2.33	0.32	1.24
ENSMUSG00000035365	chr10:88146852:88146878:-@chr10:88146496:88146578:-@chr10:88143940:88144095:-	0.81	0.54	0.98	0.48	0.23	0.77	0.81	0.54	0.98	0.54	0.25	0.94	0.33	1.98	0.27	1.56
ENSMUSG00000020284	chr10:77981584:77981813:+@chr10:77982550:77982686:+@chr10:77982870:77983041:+	0.05	0.01	0.18	0.16	0.02	0.43	0.05	0.01	0.18	0.38	0.1	0.71	-0.11	0.34	-0.33	3.2
NA	chr12:55612634:55612758:-@chr12:55612073:55612103:-@chr12:55602899:55604271:-	0.8	0.44	0.99	0.6	0.26	0.98	0.8	0.44	0.99	0.3	0.03	0.86	0.2	0.87	0.5	2.61
ENSMUSG00000029475	chr5:122881964:122882224:-@chr5:122881020:122881058:-@chr5:122880173:122880852:-	0.76	0.56	0.94	0.97	0.89	1	0.76	0.56	0.94	0.96	0.88	1	-0.21	2.13	-0.2	1.35
ENSMUSG00000039069	chr2:180071794:180071886:+@chr2:180073140:180073233:+@chr2:180078004:180078142:+	0.71	0.52	0.88	0.43	0.26	0.6	0.71	0.52	0.88	0.47	0.26	0.69	0.28	2.02	0.24	1.43
ENSMUSG00000000730	chr10:78055335:78055716:+@chr10:78056585:78056750:+@chr10:78056845:78056920:+	0.8	0.46	0.99	0.37	0.06	0.8	0.8	0.46	0.99	0.65	0.24	0.93	0.43	2.61	0.15	0.84
NA	chr9:122117266:122117407:+@chr9:122131893:122131942:+@chr9:122136906:122137601:+	0.38	0.17	0.71	0.74	0.45	0.97	0.38	0.17	0.71	0.5	0.23	0.8	-0.36	2.79	-0.12	0.65
NA	chr10:118164201:118164447:+@chr10:118166625:118166684:+@chr10:118168051:118168999:+	0.84	0.67	0.96	0.67	0.38	0.9	0.84	0.67	0.96	0.55	0.32	0.79	0.17	0.68	0.29	2.76
ENSMUSG00000058835	chr2:22957018:22957118:-@chr2:22953435:22953611:-@chr2:22946576:22946761:-	0.88	0.7	0.98	0.66	0.5	0.82	0.88	0.7	0.98	0.69	0.54	0.84	0.22	2.25	0.19	1.16
ENSMUSG00000027684	chr3:30509430:30509487:-@chr3:30237978:30238321:-@chr3:30009763:30009897:-	0.77	0.42	0.96	0.36	0.07	0.77	0.77	0.42	0.96	0.66	0.13	0.97	0.41	2.54	0.11	0.86
ENSMUSG00000026632	chr1:191054856:191054911:-@chr1:191052860:191052972:-@chr1:191049282:191049362:-	0.78	0.48	0.96	0.5	0.23	0.76	0.78	0.48	0.96	0.43	0.2	0.75	0.28	1.6	0.35	1.79
ENSMUSG00000029130	chr5:29206696:29206804:+@chr5:29224117:29224284:+@chr5:29225043:29225291:+	0.89	0.6	0.99	0.81	0.51	0.98	0.89	0.6	0.99	0.53	0.25	0.79	0.08	0.49	0.36	2.89
ENSMUSG00000028107	chr3:95753007:95753130:-@chr3:95750867:95750984:-@chr3:95750701:95750765:-	0.7	0.58	0.84	0.53	0.35	0.71	0.7	0.58	0.84	0.47	0.32	0.62	0.17	0.97	0.23	2.39
ENSMUSG00000035842	chr17:66129857:66130102:+@chr17:66130460:66130468:+@chr17:66130680:66130834:+	0.37	0.04	0.97	0.48	0.03	0.98	0.37	0.04	0.97	0.66	0.27	0.97	-0.11	1.59	-0.29	1.75
ENSMUSG00000021140	chr12:81928242:81928374:+@chr12:81933531:81933715:+@chr12:81946931:81947021:+	0.51	0.22	0.8	0.84	0.51	0.99	0.51	0.22	0.8	0.74	0.32	1	-0.33	2.21	-0.23	1.12
ENSMUSG00000058755	chr11:4236420:4236913:+@chr11:4238406:4238542:+@chr11:4239386:4241026:+	0.7	0.45	0.94	0.39	0.03	0.93	0.7	0.45	0.94	0.33	0.01	0.83	0.31	1.45	0.37	1.87
ENSMUSG00000040712	chr11:70683890:70684025:-@chr11:70683279:70683365:-@chr11:70682894:70683047:-	0.75	0.43	0.98	0.37	0.15	0.66	0.75	0.43	0.98	0.59	0.23	0.89	0.38	2.47	0.16	0.85
ENSMUSG00000022537	chr16:30518300:30518332:-@chr16:30517153:30517458:-@chr16:30511855:30514822:-	0.19	0.01	0.6	0.53	0.18	0.92	0.19	0.01	0.6	0.45	0.07	0.87	-0.34	1.89	-0.26	1.4
ENSMUSG00000068114	chr15:82131424:82131545:+@chr15:82131745:82131829:+@chr15:82134581:82134762:+	0.58	0.32	0.91	0.91	0.77	0.99	0.58	0.32	0.91	0.87	0.61	1	-0.33	2.04	-0.29	1.24
ENSMUSG00000023805	chr17:6028419:6028586:+@chr17:6029684:6029834:+@chr17:6032697:6032809:+	0.26	0.08	0.52	0.64	0.24	0.92	0.26	0.08	0.52	0.46	0.14	0.88	-0.38	2.49	-0.2	0.79
ENSMUSG00000036555	chr5:140677416:140677506:-@chr5:140675078:140675248:-@chr5:140674337:140674360:-	0.85	0.58	0.99	0.46	0.2	0.82	0.85	0.58	0.99	0.73	0.35	0.96	0.39	2.78	0.12	0.5
ENSMUSG00000031970	chr8:123509842:123509994:-@chr8:123509083:123509223:-@chr8:123505687:123506838:-	0.33	0.05	0.84	0.77	0.45	0.97	0.33	0.05	0.84	0.59	0.08	0.99	-0.44	2.18	-0.26	1.08
ENSMUSG00000049580	chr7:98359358:98359467:-@chr7:98353477:98353616:-@chr7:98350668:98353130:-	0.15	0.04	0.28	0.37	0.19	0.57	0.15	0.04	0.28	0.38	0.2	0.61	-0.22	1.54	-0.23	1.72
ENSMUSG00000043857	chr11:116973301:116973431:+@chr11:116974192:116974197:+@chr11:116977681:116977836:+	0.26	0.04	0.68	0.59	0.12	0.96	0.26	0.04	0.68	0.54	0.05	0.99	-0.33	2	-0.28	1.24
ENSMUSG00000045427	chrX:134602692:134602762:+@chrX:134602918:134602962:+@chrX:134604855:134607054:+	0.6	0.47	0.72	0.83	0.68	0.97	0.6	0.47	0.72	0.79	0.62	0.97	-0.23	2.29	-0.19	0.93
NA	chr6:31605211:31605452:+@chr6:31671683:31671792:+@chr6:31742953:31743316:+	0.23	0.02	0.78	0.58	0.22	0.96	0.23	0.02	0.78	0.52	0.1	0.93	-0.35	2.11	-0.29	1.11
ENSMUSG00000031434	chrX:139871272:139871654:-@chrX:139871070:139871142:-@chrX:139864495:139864627:-	0.5	0.21	0.84	0.75	0.44	0.98	0.5	0.21	0.84	0.86	0.6	0.98	-0.25	0.95	-0.36	2.24
ENSMUSG00000031150	chrX:7741212:7741324:-@chrX:7740349:7740405:-@chrX:7738370:7738523:-	0.17	0.05	0.49	0.24	0.04	0.57	0.17	0.05	0.49	0.65	0.22	0.95	-0.07	0.45	-0.48	2.74
ENSMUSG00000035696	chr4:44167318:44167538:-@chr4:44158903:44159052:-@chr4:44152360:44152553:-	0.26	0.12	0.44	0.6	0.3	0.94	0.26	0.12	0.44	0.44	0.22	0.67	-0.34	2.27	-0.18	0.92
ENSMUSG00000024039	chr17:31615474:31615558:-@chr17:31614529:31614570:-@chr17:31612623:31613293:-	0.17	0.05	0.38	0.43	0.23	0.71	0.17	0.05	0.38	0.41	0.18	0.65	-0.26	1.63	-0.24	1.56
ENSMUSG00000073406	chr17:36083696:36083965:-@chr17:36083233:36083508:-@chr17:36081242:36081517:-	0.87	0.64	0.99	0.47	0.09	0.83	0.87	0.64	0.99	0.83	0.47	0.98	0.4	2.86	0.04	0.33
NA	chrX:103496438:103496530:+@chrX:103524867:103524996:+@chrX:103529642:103530703:+	0.71	0.25	0.98	0.4	0.06	0.9	0.71	0.25	0.98	0.46	0.05	0.91	0.31	1.65	0.25	1.52
ENSMUSG00000021457	chr13:52583437:52583605:+@chr13:52596958:52597054:+@chr13:52610796:52611252:+	0.09	0.01	0.21	0.34	0.06	0.69	0.09	0.01	0.21	0.39	0.16	0.71	-0.25	0.97	-0.3	2.2
ENSMUSG00000055373	chr4:25799589:25800003:-@chr4:25709028:25709114:-@chr4:25609333:25620820:-	0.76	0.44	0.96	0.68	0.27	0.96	0.76	0.44	0.96	0.36	0.07	0.79	0.08	0.54	0.4	2.63
ENSMUSG00000034157	chr12:86952744:86952931:+@chr12:86959728:86959828:+@chr12:86960272:86960441:+	0.19	0.07	0.38	0.47	0.27	0.67	0.19	0.07	0.38	0.33	0.11	0.72	-0.28	2.69	-0.14	0.47
ENSMUSG00000007476,ENSMUSG00000079484	chr2:30269689:30269847:+@chr2:30274470:30274723:+@chr2:30277003:30277058:+	0.48	0.27	0.73	0.79	0.52	0.97	0.48	0.27	0.73	0.72	0.44	0.98	-0.31	2.26	-0.24	0.9
ENSMUSG00000041831	chr17:6701238:6701304:+@chr17:6702880:6702958:+@chr17:6705894:6706018:+	0.81	0.51	0.98	0.44	0.03	0.9	0.81	0.51	0.98	0.55	0.14	0.91	0.37	1.86	0.26	1.29
ENSMUSG00000052384	chr16:32165380:32165476:-@chr16:32147553:32147673:-@chr16:32142825:32145005:-	0.2	0.01	0.67	0.39	0.05	0.88	0.2	0.01	0.67	0.6	0.23	0.87	-0.19	0.89	-0.4	2.24
ENSMUSG00000078765	chr7:30563532:30563619:+@chr7:30563885:30563996:+@chr7:30564203:30564301:+	0.25	0.08	0.44	0.54	0.27	0.85	0.25	0.08	0.44	0.57	0.27	0.93	-0.29	1.62	-0.32	1.51
ENSMUSG00000033060	chr14:101929176:101929451:+@chr14:101931172:101931280:+@chr14:101932570:101932672:+	0.52	0.3	0.75	0.8	0.55	0.95	0.52	0.3	0.75	0.69	0.4	0.88	-0.28	2.24	-0.17	0.88
ENSMUSG00000030924	chr7:119827303:119827376:+@chr7:119828092:119828206:+@chr7:119832671:119832775:+	0.84	0.58	0.99	0.72	0.36	0.99	0.84	0.58	0.99	0.35	0.02	0.81	0.12	0.53	0.49	2.57
ENSMUSG00000020329	chr10:79738682:79738804:-@chr10:79738328:79738410:-@chr10:79738031:79738210:-	0.92	0.76	0.99	0.77	0.54	0.94	0.92	0.76	0.99	0.59	0.34	0.86	0.15	0.64	0.33	2.44
ENSMUSG00000026384	chr1:119783482:119783589:-@chr1:119773049:119773127:-@chr1:119765878:119765922:-	0.42	0.07	0.79	0.71	0.29	1	0.42	0.07	0.79	0.77	0.39	0.99	-0.29	1.54	-0.35	1.53
ENSMUSG00000027198	chr2:93822387:93822568:-@chr2:93821610:93821681:-@chr2:93820030:93820149:-	0.77	0.45	0.99	0.32	0.02	0.81	0.77	0.45	0.99	0.67	0.34	0.93	0.45	2.34	0.1	0.7
ENSMUSG00000043015	chr1:52637365:52637480:+@chr1:52645261:52645486:+@chr1:52648750:52648926:+	0.82	0.64	0.94	0.55	0.3	0.88	0.82	0.64	0.94	0.55	0.34	0.79	0.27	1.24	0.27	1.8
ENSMUSG00000038080	chr13:47067445:47067582:+@chr13:47071892:47072019:+@chr13:47073711:47073842:+	0.5	0.3	0.71	0.82	0.51	1	0.5	0.3	0.71	0.76	0.46	1	-0.32	1.95	-0.26	1.08
ENSMUSG00000024985	chr19:55743073:55743197:+@chr19:55755014:55755082:+@chr19:55817764:55817865:+	0.36	0.16	0.57	0.55	0.21	0.83	0.36	0.16	0.57	0.68	0.41	0.89	-0.19	0.83	-0.32	2.2
ENSMUSG00000058239	chr7:30956696:30956757:-@chr7:30956149:30956267:-@chr7:30955290:30955440:-	0.4	0.28	0.56	0.67	0.44	0.9	0.4	0.28	0.56	0.67	0.39	0.93	-0.27	1.96	-0.27	1.06
ENSMUSG00000023764	chr11:3164557:3164713:-@chr11:3153432:3153498:-@chr11:3146162:3146292:-	0.48	0.16	0.88	0.81	0.4	1	0.48	0.16	0.88	0.61	0.17	0.97	-0.33	2.14	-0.13	0.88
ENSMUSG00000042213	chr6:116273573:116273872:+@chr6:116284740:116284815:+@chr6:116285854:116285921:+	0.54	0.21	0.91	0.14	0.01	0.52	0.54	0.21	0.91	0.38	0.05	0.9	0.4	2.15	0.16	0.85
ENSMUSG00000030583	chr7:29505294:29505460:-@chr7:29503851:29503915:-@chr7:29434749:29434825:-	0.29	0.01	0.85	0.63	0.23	0.99	0.29	0.01	0.85	0.5	0.08	0.89	-0.34	1.99	-0.21	1
ENSMUSG00000039069	chr2:180071794:180071886:+@chr2:180078004:180078142:+@chr2:180078619:180078823:+	0.51	0.35	0.67	0.73	0.56	0.87	0.51	0.35	0.67	0.76	0.52	0.93	-0.22	1.34	-0.25	1.65
NA	chr5:122737433:122737533:-@chr5:122736988:122737030:-@chr5:122731170:122734245:-	0.17	0.02	0.46	0.26	0.04	0.64	0.17	0.02	0.46	0.54	0.18	0.9	-0.09	0.55	-0.37	2.44
ENSMUSG00000029032	chr4:154299825:154299895:-@chr4:154292832:154292942:-@chr4:154290936:154291553:-	0.73	0.46	0.93	0.39	0.12	0.8	0.73	0.46	0.93	0.62	0.23	0.93	0.34	2.38	0.11	0.6
ENSMUSG00000026649	chr1:171113918:171114096:+@chr1:171123046:171123193:+@chr1:171125034:171125096:+	0.56	0.22	0.86	0.43	0.12	0.84	0.56	0.22	0.86	0.17	0.02	0.45	0.13	0.79	0.39	2.18
ENSMUSG00000051351	chr4:136284683:136285095:+@chr4:136286427:136286481:+@chr4:136287189:136287315:+	0.69	0.21	0.99	0.48	0.05	0.94	0.69	0.21	0.99	0.35	0.07	0.68	0.21	1.27	0.34	1.7
ENSMUSG00000026811	chr2:32606961:32607111:+@chr2:32609226:32609316:+@chr2:32612224:32612403:+	0.5	0.18	0.85	0.61	0.28	0.9	0.5	0.18	0.85	0.86	0.63	0.99	-0.11	0.71	-0.36	2.26
ENSMUSG00000043323	chr5:110378894:110379114:-@chr5:110378429:110378497:-@chr5:110378038:110378255:-	0.55	0.19	0.87	0.32	0.16	0.55	0.55	0.19	0.87	0.2	0.03	0.49	0.23	1.1	0.35	1.86
ENSMUSG00000030616	chr7:90392359:90392453:+@chr7:90395163:90395282:+@chr7:90396474:90396643:+	0.78	0.37	0.99	0.62	0.33	0.89	0.78	0.37	0.99	0.44	0.16	0.77	0.16	1.15	0.34	1.81
ENSMUSG00000034164	chr11:5116880:5116924:-@chr11:5110690:5110774:-@chr11:5106266:5106969:-	0.38	0.01	0.89	0.62	0.24	0.91	0.38	0.01	0.89	0.64	0.22	0.93	-0.24	1.58	-0.26	1.38
ENSMUSG00000073406	chr17:36083233:36083508:-@chr17:36081476:36081517:-@chr17:36080999:36081115:-	0.85	0.55	1	0.46	0.05	0.92	0.85	0.55	1	0.56	0.21	0.93	0.39	1.58	0.29	1.37
ENSMUSG00000055817	chr17:83804451:83804597:+@chr17:83818362:83818552:+@chr17:83820180:83821516:+	0.28	0.05	0.67	0.42	0.09	0.81	0.28	0.05	0.67	0.7	0.3	0.99	-0.14	0.73	-0.42	2.22
ENSMUSG00000062785	chr7:44598384:44598575:+@chr7:44600869:44600928:+@chr7:44601869:44604751:+	0.19	0.01	0.56	0.33	0.05	0.71	0.19	0.01	0.56	0.54	0.12	0.96	-0.14	0.67	-0.35	2.28
ENSMUSG00000021662	chr13:97942453:97942584:-@chr13:97939460:97939560:-@chr13:97936823:97936861:-	0.51	0.2	0.88	0.82	0.4	0.99	0.51	0.2	0.88	0.8	0.45	0.99	-0.31	1.48	-0.29	1.46
ENSMUSG00000001062	chr8:123245944:123246073:-@chr8:123245507:123245712:-@chr8:123245114:123245210:-	0.88	0.67	1	0.83	0.51	0.99	0.88	0.67	1	0.52	0.16	0.85	0.05	0.39	0.36	2.54
ENSMUSG00000089871	chr5:15699174:15699248:+@chr5:15705448:15705489:+@chr5:15710799:15710945:+	0.5	0.07	0.88	0.89	0.63	0.99	0.5	0.07	0.88	0.71	0.26	0.99	-0.39	1.68	-0.21	1.25
ENSMUSG00000055897	chr2:173659323:173659367:-@chr2:173615483:173616423:-@chr2:173608733:173608879:-	0.16	0.05	0.35	0.26	0.09	0.62	0.16	0.05	0.35	0.5	0.19	0.84	-0.1	0.42	-0.34	2.51
ENSMUSG00000025871	chr13:54565182:54565382:-@chr13:54564510:54564621:-@chr13:54564185:54564272:-	0.95	0.86	0.99	0.71	0.49	0.91	0.95	0.86	0.99	0.76	0.52	0.96	0.24	2.2	0.19	0.72
ENSMUSG00000028613	chr4:107847444:107847566:+@chr4:107850104:107850142:+@chr4:107851308:107851427:+	0.48	0.17	0.73	0.79	0.51	0.98	0.48	0.17	0.73	0.69	0.4	0.9	-0.31	2.01	-0.21	0.89
ENSMUSG00000059475	chr9:20492386:20492451:-@chr9:20486330:20486437:-@chr9:20478133:20478254:-	0.48	0.31	0.68	0.67	0.41	0.88	0.48	0.31	0.68	0.76	0.53	0.93	-0.19	0.88	-0.28	2
ENSMUSG00000035919	chr9:22648020:22648034:+@chr9:22654072:22654088:+@chr9:22655225:22655365:+	0.22	0.01	0.62	0.34	0.03	0.83	0.22	0.01	0.62	0.52	0.06	0.88	-0.12	0.77	-0.3	2.09
ENSMUSG00000036918	chr17:87292811:87292979:+@chr17:87294009:87294066:+@chr17:87306929:87307059:+	0.49	0.09	0.83	0.11	0.01	0.32	0.49	0.09	0.83	0.23	0.04	0.58	0.38	1.76	0.26	1.09
NA	chr1:166307720:166307933:+@chr1:166308847:166309543:+@chr1:166310760:166316832:+	0.57	0.14	0.98	0.53	0.08	0.94	0.57	0.14	0.98	0.21	0.02	0.63	0.04	1.36	0.36	1.48
ENSMUSG00000046862	chr4:143412426:143413091:+@chr4:143415349:143415413:+@chr4:143416620:143416952:+	0.91	0.77	0.99	0.63	0.35	0.87	0.91	0.77	0.99	0.72	0.38	0.92	0.28	2.23	0.19	0.6
ENSMUSG00000002546	chr2:32297521:32297577:+@chr2:32297754:32297834:+@chr2:32298600:32298638:+	0.82	0.67	0.93	0.64	0.39	0.88	0.82	0.67	0.93	0.56	0.35	0.77	0.18	0.78	0.26	2.05
ENSMUSG00000044122	chr11:78201812:78201892:+@chr11:78204065:78204197:+@chr11:78204840:78205763:+	0.29	0.06	0.66	0.6	0.26	0.9	0.29	0.06	0.66	0.61	0.31	0.93	-0.31	1.31	-0.32	1.51
ENSMUSG00000075256	chr2:79392943:79393185:-@chr2:79361324:79361387:-@chr2:79343217:79343291:-	0.57	0.1	0.98	0.5	0.02	0.99	0.57	0.1	0.98	0.19	0	0.64	0.07	1.32	0.38	1.5
ENSMUSG00000026730	chr2:12924041:12924198:+@chr2:12978160:12978413:+@chr2:12980293:12980558:+	0.8	0.57	0.96	0.63	0.37	0.91	0.8	0.57	0.96	0.48	0.23	0.77	0.17	0.75	0.32	2.07
ENSMUSG00000039648	chr2:30194054:30194112:-@chr2:30192188:30192285:-@chr2:30191925:30192072:-	0.28	0.15	0.43	0.37	0.13	0.71	0.28	0.15	0.43	0.66	0.28	0.96	-0.09	0.46	-0.38	2.36
ENSMUSG00000039850	chr11:119499527:119499661:+@chr11:119499846:119499885:+@chr11:119500591:119500703:+	0.79	0.46	0.98	0.56	0.21	0.94	0.79	0.46	0.98	0.5	0.12	0.96	0.23	0.91	0.29	1.9
ENSMUSG00000015653	chr5:5693958:5694077:-@chr5:5683292:5683417:-@chr5:5682534:5683055:-	0.46	0.33	0.62	0.58	0.38	0.79	0.46	0.33	0.62	0.74	0.51	0.92	-0.12	0.49	-0.28	2.31
ENSMUSG00000001036	chr11:61565822:61565894:-@chr11:61548008:61548042:-@chr11:61546150:61546911:-	0.11	0.02	0.34	0.26	0.06	0.65	0.11	0.02	0.34	0.39	0.14	0.71	-0.15	0.49	-0.28	2.29
ENSMUSG00000066152	chr4:62292632:62292698:+@chr4:62295887:62296076:+@chr4:62296975:62298411:+	0.62	0.46	0.8	0.86	0.6	0.99	0.62	0.46	0.8	0.84	0.64	0.97	-0.24	1.44	-0.22	1.32
ENSMUSG00000038248	chr10:43127779:43127930:-@chr10:43074593:43074688:-@chr10:43020982:43022918:-	0.42	0.08	0.86	0.72	0.38	0.96	0.42	0.08	0.86	0.56	0.16	0.98	-0.3	1.71	-0.14	1.05
ENSMUSG00000008855	chr11:102224734:102224955:-@chr11:102219145:102219281:-@chr11:102218416:102218781:-	0.61	0.21	0.93	0.46	0.13	0.9	0.61	0.21	0.93	0.22	0.02	0.67	0.15	0.91	0.39	1.84
NA	chr2:156931216:156931267:-@chr2:156929932:156929970:-@chr2:156927342:156928881:-	0.09	0.01	0.25	0.26	0.05	0.69	0.09	0.01	0.25	0.4	0.14	0.84	-0.17	0.54	-0.31	2.21
ENSMUSG00000026811	chr2:32599709:32599836:+@chr2:32609226:32609316:+@chr2:32612224:32612403:+	0.4	0.07	0.87	0.67	0.21	0.95	0.4	0.07	0.87	0.77	0.48	0.97	-0.27	1.19	-0.37	1.55
ENSMUSG00000022075	chr14:69800618:69800819:-@chr14:69800368:69800431:-@chr14:69799678:69799781:-	0.06	0	0.22	0.38	0.13	0.65	0.06	0	0.22	0.28	0.03	0.73	-0.32	2.12	-0.22	0.59
ENSMUSG00000028382	chr4:59549148:59549364:-@chr4:59546149:59546182:-@chr4:59501310:59501474:-	0.29	0.06	0.68	0.69	0.37	0.91	0.29	0.06	0.68	0.4	0.09	0.79	-0.4	2.01	-0.11	0.7
ENSMUSG00000067653	chr1:36532112:36532210:-@chr1:36531723:36531821:-@chr1:36530534:36531641:-	0.67	0.23	0.99	0.39	0.05	0.91	0.67	0.23	0.99	0.36	0.03	0.89	0.28	1.34	0.31	1.34
ENSMUSG00000013236	chr17:56434453:56434597:-@chr17:56429099:56429157:-@chr17:56424880:56424977:-	0.24	0.11	0.41	0.36	0.14	0.62	0.24	0.11	0.41	0.53	0.31	0.79	-0.12	0.48	-0.29	2.2
ENSMUSG00000026442	chr1:132741671:132741797:-@chr1:132665479:132665587:-@chr1:132642678:132642858:-	0.88	0.64	0.99	0.67	0.31	0.92	0.88	0.64	0.99	0.46	0.05	0.92	0.21	0.99	0.42	1.69
ENSMUSG00000038718	chr2:34370824:34370897:-@chr2:34224545:34224646:-@chr2:34213252:34213442:-	0.68	0.33	0.98	0.45	0.11	0.9	0.68	0.33	0.98	0.4	0.07	0.84	0.23	1.19	0.28	1.46
ENSMUSG00000061533	chr12:91259986:91260636:-@chr12:91255575:91255739:-@chr12:91234044:91234220:-	0.94	0.8	0.99	0.56	0.25	0.92	0.94	0.8	0.99	0.83	0.54	0.97	0.38	2.35	0.11	0.3
ENSMUSG00000041193	chr4:138806185:138806234:-@chr4:138804507:138804651:-@chr4:138801352:138801458:-	0.44	0.22	0.67	0.65	0.34	0.89	0.44	0.22	0.67	0.77	0.47	0.99	-0.21	0.86	-0.33	1.78
ENSMUSG00000061130	chr17:85005509:85005566:+@chr17:85015409:85015435:+@chr17:85023032:85023079:+	0.75	0.49	0.92	0.6	0.28	0.85	0.75	0.49	0.92	0.41	0.15	0.66	0.15	0.57	0.34	2.07
NA	chr3:151749836:151749959:-@chr3:151749145:151749249:-@chr3:151747618:151747654:-	0.39	0.14	0.72	0.65	0.33	0.9	0.39	0.14	0.72	0.7	0.36	0.91	-0.26	1.26	-0.31	1.37
ENSMUSG00000049550	chr5:123640494:123640554:-@chr5:123638956:123638988:-@chr5:123635174:123635278:-	0.43	0.01	0.84	0.6	0.27	0.88	0.43	0.01	0.84	0.73	0.22	0.98	-0.17	0.82	-0.3	1.81
ENSMUSG00000033099	chr15:78935186:78935694:+@chr15:78935809:78935899:+@chr15:78936479:78936584:+	0.52	0.29	0.8	0.19	0.02	0.51	0.52	0.29	0.8	0.33	0.13	0.61	0.33	1.88	0.19	0.74
NA	chr14:32085374:32085566:+@chr14:32085849:32086053:+@chr14:32091636:32091759:+	0.8	0.61	0.99	0.57	0.42	0.72	0.8	0.61	0.99	0.54	0.37	0.74	0.23	1.24	0.26	1.38
ENSMUSG00000040428	chr7:45549230:45549306:+@chr7:45549804:45549965:+@chr7:45553569:45553681:+	0.91	0.76	1	0.78	0.34	0.98	0.91	0.76	1	0.41	0.06	0.93	0.13	0.43	0.5	2.18
ENSMUSG00000021457	chr13:52623245:52623276:+@chr13:52624708:52624776:+@chr13:52631657:52631744:+	0.74	0.44	0.97	0.52	0.29	0.78	0.74	0.44	0.97	0.4	0.16	0.71	0.22	0.85	0.34	1.76
ENSMUSG00000040640	chr14:28302876:28303010:+@chr14:28317249:28317314:+@chr14:28475603:28478537:+	0.59	0.11	0.95	0.27	0.01	0.77	0.59	0.11	0.95	0.51	0.05	0.93	0.32	1.63	0.08	0.98
ENSMUSG00000042594	chr5:121836550:121836801:-@chr5:121832503:121832590:-@chr5:121828402:121829076:-	0.15	0.02	0.4	0.4	0.09	0.76	0.15	0.02	0.4	0.46	0.08	0.86	-0.25	1.01	-0.31	1.58
ENSMUSG00000035640	chr10:80136874:80136938:-@chr10:80136705:80136743:-@chr10:80136350:80136494:-	0.51	0.1	0.86	0.25	0.02	0.65	0.51	0.1	0.86	0.34	0.07	0.85	0.26	1.29	0.17	1.29
ENSMUSG00000044033	chr2:77108363:77108479:-@chr2:77089070:77089264:-@chr2:77074836:77075008:-	0.85	0.65	0.96	0.79	0.43	1	0.85	0.65	0.96	0.5	0.17	0.87	0.06	0.43	0.35	2.15
ENSMUSG00000036356	chr8:68645799:68645935:-@chr8:68588354:68588424:-@chr8:68556972:68557120:-	0.55	0.06	0.96	0.34	0.08	0.7	0.55	0.06	0.96	0.23	0.01	0.67	0.21	1.04	0.32	1.53
ENSMUSG00000000530	chr15:101128927:101129063:+@chr15:101129965:101130051:+@chr15:101134645:101134743:+	0.54	0.14	0.99	0.42	0.07	0.94	0.54	0.14	0.99	0.2	0.02	0.58	0.12	0.99	0.34	1.58
ENSMUSG00000004127	chr3:138143799:138143995:+@chr3:138145761:138145925:+@chr3:138147375:138147570:+	0.11	0.04	0.22	0.4	0.16	0.77	0.11	0.04	0.22	0.23	0.06	0.45	-0.29	2.18	-0.12	0.39
ENSMUSG00000048232	chr4:45058329:45059150:-@chr4:45051553:45051702:-@chr4:45048440:45048576:-	0.45	0.13	0.87	0.66	0.17	0.99	0.45	0.13	0.87	0.72	0.27	0.98	-0.21	1.39	-0.27	1.18
ENSMUSG00000020513	chr11:86557725:86557889:+@chr11:86561236:86561376:+@chr11:86565685:86565868:+	0.91	0.7	0.99	0.8	0.5	0.97	0.91	0.7	0.99	0.58	0.27	0.86	0.11	0.4	0.33	2.17
ENSMUSG00000051375	chr18:38192052:38192271:-@chr18:38191061:38191099:-@chr18:38185915:38189942:-	0.23	0.02	0.55	0.49	0.04	0.88	0.23	0.02	0.55	0.53	0.13	0.97	-0.26	1.56	-0.3	1
ENSMUSG00000040328	chr11:49087034:49087144:+@chr11:49117621:49118114:+@chr11:49124284:49124311:+	0.69	0.27	0.99	0.52	0.11	0.94	0.69	0.27	0.99	0.33	0.01	0.82	0.17	1.27	0.36	1.29
ENSMUSG00000087366	chr4:95101058:95101307:+@chr4:95137415:95137494:+@chr4:95147105:95147200:+	0.59	0.15	0.95	0.4	0.04	0.81	0.59	0.15	0.95	0.3	0.04	0.75	0.19	1.08	0.29	1.48
ENSMUSG00000049606	chr5:106696532:106696830:-@chr5:106695643:106695699:-@chr5:106690671:106690877:-	0.71	0.39	0.98	0.39	0.02	0.83	0.71	0.39	0.98	0.62	0.26	0.96	0.32	1.73	0.09	0.8
ENSMUSG00000063889	chr18:3309646:3309755:-@chr18:3299162:3299308:-@chr18:3295322:3295416:-	0.78	0.54	0.97	0.39	0.1	0.85	0.78	0.54	0.97	0.64	0.33	0.88	0.39	1.73	0.14	0.79
NA	chr11:116344195:116344305:-@chr11:116340338:116340378:-@chr11:116336345:116338830:-	0.59	0.22	0.94	0.54	0.13	0.87	0.59	0.22	0.94	0.19	0.01	0.53	0.05	0.68	0.4	1.83
ENSMUSG00000001062	chr8:123245944:123246073:-@chr8:123245482:123245712:-@chr8:123245114:123245210:-	0.85	0.6	1	0.75	0.35	0.98	0.85	0.6	1	0.38	0.03	0.91	0.1	0.6	0.47	1.91
ENSMUSG00000025728	chr17:25934758:25934878:-@chr17:25932105:25932231:-@chr17:25931674:25931827:-	0.87	0.73	0.97	0.61	0.36	0.86	0.87	0.73	0.97	0.67	0.37	0.98	0.26	1.68	0.2	0.83
ENSMUSG00000097487,ENSMUSG00000097239	chr11:101421865:101421954:-@chr11:101419675:101419728:-@chr11:101418814:101419186:-	0.78	0.48	0.99	0.52	0.27	0.78	0.78	0.48	0.99	0.55	0.25	0.84	0.26	1.32	0.23	1.17
ENSMUSG00000029534	chr6:17848004:17848079:+@chr6:17850357:17850425:+@chr6:17852258:17852412:+	0.29	0.13	0.51	0.45	0.23	0.71	0.29	0.13	0.51	0.57	0.33	0.84	-0.16	0.66	-0.28	1.83
ENSMUSG00000005983	chr16:3908605:3908653:-@chr16:3907999:3908137:-@chr16:3906841:3907194:-	0.51	0.2	0.96	0.29	0.02	0.89	0.51	0.2	0.96	0.26	0.07	0.56	0.22	1.37	0.25	1.11
ENSMUSG00000042632	chr15:79328210:79328371:-@chr15:79327635:79327714:-@chr15:79317761:79318010:-	0.84	0.61	0.98	0.73	0.47	0.94	0.84	0.61	0.98	0.5	0.28	0.77	0.11	0.56	0.34	1.92
ENSMUSG00000028382	chr4:59549148:59549364:-@chr4:59546149:59546182:-@chr4:59524395:59524476:-	0.38	0.21	0.59	0.66	0.42	0.85	0.38	0.21	0.59	0.52	0.2	0.79	-0.28	1.79	-0.14	0.69
NA	chr4:136423524:136423775:+@chr4:136423972:136424129:+@chr4:136441747:136444402:+	0.55	0.13	0.96	0.3	0	0.79	0.55	0.13	0.96	0.2	0.03	0.53	0.25	1.13	0.35	1.34
ENSMUSG00000042709	chr11:60416986:60417042:-@chr11:60411667:60411729:-@chr11:60409586:60409630:-	0.65	0.34	0.89	0.4	0.17	0.68	0.65	0.34	0.89	0.41	0.19	0.67	0.25	1.1	0.24	1.36
ENSMUSG00000012609	chr12:86012648:86012862:+@chr12:86020521:86020603:+@chr12:86053143:86053760:+	0.56	0.3	0.82	0.81	0.56	0.96	0.56	0.3	0.82	0.8	0.54	0.99	-0.25	1.33	-0.24	1.13
ENSMUSG00000028522	chr4:103115560:103115660:+@chr4:103118239:103118315:+@chr4:103127273:103127297:+	0.47	0.25	0.79	0.64	0.34	0.9	0.47	0.25	0.79	0.78	0.46	0.99	-0.17	0.68	-0.31	1.78
ENSMUSG00000013973	chr1:171329569:171329692:+@chr1:171331253:171331285:+@chr1:171338252:171338640:+	0.39	0.22	0.59	0.52	0.24	0.83	0.39	0.22	0.59	0.68	0.42	0.9	-0.13	0.56	-0.29	1.9
ENSMUSG00000026946	chr2:51972909:51973208:-@chr2:51972588:51972627:-@chr2:51960571:51960660:-	0.28	0.14	0.45	0.45	0.2	0.7	0.28	0.14	0.45	0.51	0.3	0.69	-0.17	0.74	-0.23	1.72
ENSMUSG00000028041	chr3:89341508:89341577:-@chr3:89340863:89340937:-@chr3:89340401:89340472:-	0.72	0.36	0.97	0.32	0.03	0.79	0.72	0.36	0.97	0.66	0.22	0.97	0.4	1.8	0.06	0.64
ENSMUSG00000074136	chr8:95810231:95810297:+@chr8:95816368:95816446:+@chr8:95821423:95821728:+	0.44	0.06	0.99	0.67	0.26	0.96	0.44	0.06	0.99	0.64	0.25	0.95	-0.23	1.21	-0.2	1.23
ENSMUSG00000035967	chrX:56493039:56493133:+@chrX:56494133:56494243:+@chrX:56496516:56496734:+	0.7	0.47	0.91	0.38	0.13	0.75	0.7	0.47	0.91	0.61	0.31	0.88	0.32	1.93	0.09	0.51
ENSMUSG00000029478	chr5:125153607:125153652:-@chr5:125124770:125124980:-@chr5:125119482:125119609:-	0.94	0.79	1	0.7	0.49	0.9	0.94	0.79	1	0.78	0.53	0.96	0.24	1.85	0.16	0.59
ENSMUSG00000041607	chr18:82575172:82575207:+@chr18:82578936:82579058:+@chr18:82584112:82585637:+	0.75	0.36	0.98	0.46	0.02	0.96	0.75	0.36	0.98	0.48	0.02	0.94	0.29	1.29	0.27	1.13
ENSMUSG00000052676	chrX:134977648:134977747:-@chrX:134975318:134975362:-@chrX:134971373:134974026:-	0.32	0.02	0.74	0.63	0.15	0.92	0.32	0.02	0.74	0.53	0.13	0.95	-0.31	1.47	-0.21	0.95
ENSMUSG00000041757	chr1:133273858:133274374:+@chr1:133274793:133274879:+@chr1:133280339:133280407:+	0.53	0.22	0.87	0.22	0.06	0.48	0.53	0.22	0.87	0.34	0.15	0.6	0.31	1.73	0.19	0.69
ENSMUSG00000048537	chr9:44703803:44703892:-@chr9:44701503:44701670:-@chr9:44700946:44701086:-	0.46	0.12	0.83	0.27	0.05	0.72	0.46	0.12	0.83	0.17	0.02	0.64	0.19	0.97	0.29	1.45
ENSMUSG00000007476,ENSMUSG00000079484	chr2:30277148:30277210:+@chr2:30277623:30277829:+@chr2:30279955:30280083:+	0.82	0.46	0.99	0.41	0.12	0.82	0.82	0.46	0.99	0.6	0.19	0.99	0.41	1.69	0.22	0.72
NA	chr2:115867269:115867358:-@chr2:115866810:115866904:-@chr2:115861264:115864513:-	0.46	0.2	0.77	0.78	0.46	0.98	0.46	0.2	0.77	0.73	0.35	0.96	-0.32	1.26	-0.27	1.15
ENSMUSG00000028522	chr4:103115560:103115660:+@chr4:103118281:103118315:+@chr4:103127273:103127297:+	0.17	0.03	0.44	0.33	0	0.77	0.17	0.03	0.44	0.52	0.03	0.96	-0.16	0.89	-0.35	1.52
ENSMUSG00000042810	chr6:48395586:48395887:+@chr6:48401114:48403010:+@chr6:48403378:48403497:+	0.89	0.67	1	0.68	0.35	0.93	0.89	0.67	1	0.61	0.34	0.91	0.21	0.81	0.28	1.6
ENSMUSG00000040428	chr7:45553245:45553294:+@chr7:45553569:45553681:+@chr7:45553765:45554229:+	0.37	0.22	0.57	0.66	0.4	0.9	0.37	0.22	0.57	0.5	0.16	0.93	-0.29	1.86	-0.13	0.55
ENSMUSG00000087107	chr11:83223576:83223651:+@chr11:83224210:83224310:+@chr11:83224452:83224631:+	0.37	0.22	0.54	0.68	0.39	0.98	0.37	0.22	0.54	0.52	0.3	0.83	-0.31	1.89	-0.15	0.5
ENSMUSG00000063652	chr11:53969500:53969603:-@chr11:53960283:53960621:-@chr11:53959204:53959375:-	0.39	0.05	0.93	0.54	0.03	0.99	0.39	0.05	0.93	0.72	0.31	0.98	-0.15	1.15	-0.33	1.23
NA	chr9:96769951:96770096:+@chr9:96771568:96771613:+@chr9:96773236:96774397:+	0.2	0.02	0.61	0.5	0.08	0.93	0.2	0.02	0.61	0.51	0.11	0.92	-0.3	1.06	-0.31	1.31
ENSMUSG00000027281	chr2:137044000:137044077:+@chr2:137046717:137046805:+@chr2:137066130:137066230:+	0.76	0.57	0.91	0.47	0.22	0.72	0.76	0.57	0.91	0.62	0.32	0.88	0.29	1.83	0.14	0.53
ENSMUSG00000066406	chr7:75679820:75679873:+@chr7:75683394:75683459:+@chr7:75685117:75685309:+	0.27	0.04	0.71	0.46	0.18	0.82	0.27	0.04	0.71	0.64	0.25	0.95	-0.19	0.85	-0.37	1.51
ENSMUSG00000032567	chr9:105401476:105401686:+@chr9:105402718:105402776:+@chr9:105403396:105403591:+	0.27	0.11	0.5	0.54	0.25	0.84	0.27	0.11	0.5	0.5	0.25	0.78	-0.27	1.26	-0.23	1.08
ENSMUSG00000060988	chr2:54436387:54436729:+@chr2:54477648:54477718:+@chr2:54516442:54516681:+	0.31	0.01	0.79	0.51	0.03	0.94	0.31	0.01	0.79	0.55	0.21	0.93	-0.2	1.03	-0.24	1.31
ENSMUSG00000047040,ENSMUSG00000078700	chr11:96929324:96929509:+@chr11:96931511:96931553:+@chr11:96934518:96935647:+	0.27	0.06	0.67	0.47	0.05	0.92	0.27	0.06	0.67	0.58	0.17	0.94	-0.2	0.96	-0.31	1.36
ENSMUSG00000044937	chr10:86705811:86706017:+@chr10:86707236:86707344:+@chr10:86712765:86713739:+	0.59	0.08	0.99	0.45	0.03	0.95	0.59	0.08	0.99	0.25	0.02	0.75	0.14	0.96	0.34	1.36
ENSMUSG00000086453	chr2:164767713:164767913:-@chr2:164762721:164762881:-@chr2:164762544:164762608:-	0.28	0.09	0.7	0.65	0.29	0.95	0.28	0.09	0.7	0.33	0.01	0.93	-0.37	1.59	-0.05	0.73
ENSMUSG00000079481	chrX:102073782:102073974:+@chrX:102076162:102076293:+@chrX:102077482:102079797:+	0.34	0.06	0.76	0.69	0.38	0.9	0.34	0.06	0.76	0.42	0.04	0.85	-0.35	1.49	-0.08	0.83
ENSMUSG00000042097	chr6:117863077:117863142:+@chr6:117869218:117869273:+@chr6:117870256:117872766:+	0.7	0.42	0.93	0.61	0.19	1	0.7	0.42	0.93	0.32	0.04	0.74	0.09	0.69	0.38	1.62
NA	chr2:132385256:132385447:-@chr2:132381172:132381750:-@chr2:132370329:132374090:-	0.42	0.03	0.91	0.61	0.2	0.99	0.42	0.03	0.91	0.66	0.16	0.97	-0.19	0.94	-0.24	1.37
ENSMUSG00000018986	chr11:83191330:83191408:+@chr11:83194043:83194209:+@chr11:83212544:83213613:+	0.15	0.02	0.38	0.34	0.06	0.83	0.15	0.02	0.38	0.43	0.12	0.82	-0.19	0.68	-0.28	1.62
ENSMUSG00000027200	chr2:124660283:124660344:+@chr2:124660705:124660761:+@chr2:124664021:124667770:+	0.36	0.03	0.9	0.55	0.07	0.95	0.36	0.03	0.9	0.61	0.1	0.96	-0.19	1.02	-0.25	1.28
ENSMUSG00000027333	chr2:131520095:131520268:+@chr2:131521055:131521171:+@chr2:131524743:131525183:+	0.73	0.44	0.98	0.48	0.17	0.89	0.73	0.44	0.98	0.45	0.16	0.93	0.25	0.92	0.28	1.37
ENSMUSG00000086968	chr3:107895643:107896213:-@chr3:107894051:107894228:-@chr3:107888850:107893507:-	0.31	0.05	0.65	0.46	0.08	0.83	0.31	0.05	0.65	0.64	0.18	0.99	-0.15	0.84	-0.33	1.45
ENSMUSG00000027522	chr2:174077051:174077189:+@chr2:174084646:174084657:+@chr2:174090621:174090728:+	0.85	0.64	0.97	0.75	0.39	1	0.85	0.64	0.97	0.51	0.22	0.85	0.1	0.42	0.34	1.87
ENSMUSG00000058248	chr1:192434723:192434919:+@chr1:192453614:192453702:+@chr1:192505264:192510158:+	0.31	0.02	0.85	0.5	0.09	0.96	0.31	0.02	0.85	0.6	0.13	0.99	-0.19	1.12	-0.29	1.16
ENSMUSG00000018411	chr11:104282368:104282480:+@chr11:104287123:104287209:+@chr11:104302361:104302410:+	0.14	0.01	0.52	0.35	0.04	0.93	0.14	0.01	0.52	0.51	0.07	1	-0.21	0.73	-0.37	1.54
ENSMUSG00000041119	chr17:31386234:31386356:+@chr17:31415280:31415357:+@chr17:31420245:31420288:+	0.75	0.43	0.97	0.56	0.18	0.9	0.75	0.43	0.97	0.39	0.08	0.83	0.19	1	0.36	1.27
NA	chr2:177206340:177206439:-@chr2:177202827:177202881:-@chr2:177195702:177195828:-	0.22	0.08	0.43	0.47	0.23	0.8	0.22	0.08	0.43	0.43	0.2	0.76	-0.25	1.46	-0.21	0.81
ENSMUSG00000064307	chr7:101933764:101933857:-@chr7:101921504:101921566:-@chr7:101920637:101920774:-	0.22	0.06	0.45	0.3	0.12	0.53	0.22	0.06	0.45	0.56	0.22	0.86	-0.08	0.48	-0.34	1.79
ENSMUSG00000034055	chrX:102532077:102532115:-@chrX:102528067:102528117:-@chrX:102520754:102520924:-	0.87	0.65	0.98	0.64	0.17	0.96	0.87	0.65	0.98	0.56	0.19	0.96	0.23	0.68	0.31	1.58
ENSMUSG00000035640	chr10:80136874:80136938:-@chr10:80136663:80136743:-@chr10:80136350:80136494:-	0.81	0.55	0.98	0.56	0.28	0.81	0.81	0.55	0.98	0.53	0.19	0.93	0.25	0.93	0.28	1.33
ENSMUSG00000042298	chr11:62313016:62313178:+@chr11:62315877:62315968:+@chr11:62327898:62328451:+	0.69	0.38	0.96	0.5	0.19	0.88	0.69	0.38	0.96	0.39	0.09	0.77	0.19	0.93	0.3	1.33
ENSMUSG00000021281	chr12:111444929:111445283:+@chr12:111447983:111448097:+@chr12:111448247:111448369:+	0.9	0.65	0.99	0.54	0.21	0.97	0.9	0.65	0.99	0.74	0.41	1	0.36	1.75	0.16	0.51
NA	chr2:164456964:164457029:+@chr2:164457969:164458097:+@chr2:164460763:164461120:+	0.54	0.21	0.91	0.27	0.01	0.77	0.54	0.21	0.91	0.33	0.08	0.83	0.27	1.42	0.21	0.84
ENSMUSG00000093701	chr16:91393757:91393913:+@chr16:91407618:91407741:+@chr16:91411883:91412040:+	0.3	0.17	0.51	0.57	0.33	0.9	0.3	0.17	0.51	0.48	0.29	0.74	-0.27	1.57	-0.18	0.69
ENSMUSG00000034488	chr13:88944820:88944948:+@chr13:88977755:88977784:+@chr13:89042432:89042560:+	0.5	0.16	0.86	0.84	0.54	0.99	0.5	0.16	0.86	0.59	0.27	0.91	-0.34	1.46	-0.09	0.8
ENSMUSG00000041607	chr18:82575172:82575207:+@chr18:82575601:82575633:+@chr18:82584112:82585637:+	0.39	0.01	0.98	0.67	0.24	0.97	0.39	0.01	0.98	0.53	0.06	0.89	-0.28	1.22	-0.14	1.01
ENSMUSG00000040936	chr9:121168184:121168311:-@chr9:121160270:121160403:-@chr9:121157166:121157287:-	0.79	0.42	0.99	0.74	0.41	0.98	0.79	0.42	0.99	0.42	0.05	0.81	0.05	0.66	0.37	1.57
ENSMUSG00000053914	chr9:14500108:14500482:-@chr9:14485527:14485692:-@chr9:14462581:14464867:-	0.59	0.08	0.97	0.31	0.05	0.89	0.59	0.08	0.97	0.39	0.02	0.85	0.28	1.11	0.2	1.11
ENSMUSG00000031860	chr8:69866468:69866603:+@chr8:69870029:69870182:+@chr8:69870578:69870684:+	0.86	0.55	0.99	0.55	0.27	0.81	0.86	0.55	0.99	0.75	0.35	0.95	0.31	1.74	0.11	0.48
ENSMUSG00000028438	chr4:41464710:41464848:-@chr4:41462375:41462437:-@chr4:41429267:41429411:-	0.14	0.01	0.47	0.49	0.03	0.94	0.14	0.01	0.47	0.41	0.05	0.93	-0.35	1.28	-0.27	0.93
ENSMUSG00000052539	chr3:104017501:104017639:-@chr3:104016602:104016692:-@chr3:104013265:104016068:-	0.45	0.22	0.64	0.67	0.39	0.91	0.45	0.22	0.64	0.67	0.42	0.89	-0.22	1.01	-0.22	1.2
NA	chr6:47835661:47835920:+@chr6:47840252:47840647:+@chr6:47858929:47859055:+	0.86	0.53	1	0.56	0.17	0.93	0.86	0.53	1	0.58	0.23	0.88	0.3	1.13	0.28	1.07
ENSMUSG00000005968	chr3:94658725:94658806:-@chr3:94639395:94639469:-@chr3:94638925:94639026:-	0.49	0.3	0.7	0.67	0.38	0.91	0.49	0.3	0.7	0.77	0.45	0.96	-0.18	0.82	-0.28	1.38
ENSMUSG00000050150	chr3:135393960:135394068:+@chr3:135394844:135394980:+@chr3:135397596:135397827:+	0.31	0.06	0.69	0.63	0.12	0.98	0.31	0.06	0.69	0.5	0.1	0.96	-0.32	1.29	-0.19	0.9
ENSMUSG00000039410	chr4:154323247:154323480:-@chr4:154322271:154322445:-@chr4:154316125:154320922:-	0.37	0.15	0.64	0.55	0.1	0.92	0.37	0.15	0.64	0.66	0.22	0.95	-0.18	0.95	-0.29	1.24
ENSMUSG00000041702	chr12:102878216:102878406:-@chr12:102841039:102841191:-@chr12:102840100:102840287:-	0.2	0.1	0.38	0.5	0.19	0.8	0.2	0.1	0.38	0.43	0.2	0.73	-0.3	1.24	-0.23	0.94
ENSMUSG00000071281	chr13:67724188:67724306:-@chr13:67721447:67721545:-@chr13:67710881:67711007:-	0.08	0	0.26	0.31	0.08	0.66	0.08	0	0.26	0.37	0.08	0.8	-0.23	1.02	-0.29	1.15
ENSMUSG00000021824	chr14:21045488:21045763:-@chr14:21044815:21044824:-@chr14:21040953:21041090:-	0.55	0.33	0.79	0.85	0.53	1	0.55	0.33	0.79	0.71	0.43	0.91	-0.3	1.54	-0.16	0.63
ENSMUSG00000027007	chr2:79660854:79661004:+@chr2:79661639:79661704:+@chr2:79662309:79662764:+	0.61	0.36	0.88	0.84	0.59	0.98	0.61	0.36	0.88	0.85	0.61	0.99	-0.23	1.02	-0.24	1.14
ENSMUSG00000014767	chr17:15499888:15500024:+@chr17:15501154:15501202:+@chr17:15502962:15503128:+	0.45	0.23	0.78	0.59	0.35	0.86	0.45	0.23	0.78	0.74	0.47	0.96	-0.14	0.71	-0.29	1.45
ENSMUSG00000045083	chr4:36950258:36950489:-@chr4:36739067:36739097:-@chr4:36718867:36718963:-	0.48	0.06	0.86	0.36	0.04	0.72	0.48	0.06	0.86	0.18	0.02	0.48	0.12	0.88	0.3	1.28
NA	chr2:24367580:24367802:+@chr2:24368351:24368580:+@chr2:24394022:24395040:+	0.22	0.05	0.63	0.6	0.07	0.99	0.22	0.05	0.63	0.34	0.01	0.78	-0.38	1.12	-0.12	1.03
ENSMUSG00000022801	chr16:32985976:32986027:+@chr16:32986739:32986888:+@chr16:32988431:32988481:+	0.65	0.43	0.89	0.83	0.52	1	0.65	0.43	0.89	0.87	0.61	0.98	-0.18	0.84	-0.22	1.31
ENSMUSG00000032376	chr9:66592784:66592980:-@chr9:66566843:66566903:-@chr9:66547872:66547955:-	0.79	0.58	0.94	0.64	0.29	0.99	0.79	0.58	0.94	0.51	0.26	0.84	0.15	0.77	0.28	1.37
ENSMUSG00000004947	chr5:136021755:136021858:+@chr5:136026470:136026607:+@chr5:136028499:136028572:+	0.62	0.45	0.78	0.44	0.22	0.72	0.62	0.45	0.78	0.4	0.23	0.61	0.18	0.81	0.22	1.33
NA	chr15:76925376:76925448:-@chr15:76921116:76921200:-@chr15:76917969:76918061:-	0.2	0.01	0.65	0.53	0.07	0.98	0.2	0.01	0.65	0.32	0.03	0.8	-0.33	1.41	-0.12	0.73
ENSMUSG00000043929	chrX:94235221:94235420:+@chrX:94241945:94241995:+@chrX:94252415:94253126:+	0.82	0.5	0.97	0.57	0.19	0.94	0.82	0.5	0.97	0.56	0.1	0.95	0.25	0.92	0.26	1.2
ENSMUSG00000085936	chr13:28772619:28772666:-@chr13:28669782:28669994:-@chr13:28668370:28668704:-	0.46	0.15	0.83	0.61	0.26	0.96	0.46	0.15	0.83	0.77	0.42	0.96	-0.15	0.88	-0.31	1.24
ENSMUSG00000031887	chr8:105260522:105260680:-@chr8:105259710:105259987:-@chr8:105259437:105259629:-	0.53	0.31	0.78	0.78	0.45	0.97	0.53	0.31	0.78	0.74	0.5	0.95	-0.25	1.13	-0.21	0.99
ENSMUSG00000035984	chr18:34578558:34578767:-@chr18:34571456:34571661:-@chr18:34567036:34567154:-	0.78	0.43	0.97	0.6	0.28	0.96	0.78	0.43	0.97	0.52	0.13	0.91	0.18	1.07	0.26	1.05
ENSMUSG00000021884	chr14:31640494:31640598:-@chr14:31635744:31635784:-@chr14:31632896:31632968:-	0.68	0.2	0.99	0.53	0.13	0.94	0.68	0.2	0.99	0.4	0.01	0.96	0.15	0.8	0.28	1.32
ENSMUSG00000020541	chr11:90674670:90674819:-@chr11:90673664:90673786:-@chr11:90671084:90671200:-	0.68	0.49	0.88	0.88	0.69	0.99	0.68	0.49	0.88	0.89	0.7	0.99	-0.2	1.04	-0.21	1.08
ENSMUSG00000022629	chr15:90956295:90956509:-@chr15:90951246:90951374:-@chr15:90949006:90949044:-	0.13	0	0.6	0.5	0.05	0.92	0.13	0	0.6	0.32	0.03	0.78	-0.37	1.36	-0.19	0.75
ENSMUSG00000036411	chr9:22411577:22411749:+@chr9:22424113:22424807:+@chr9:22431676:22431808:+	0.91	0.76	0.98	0.71	0.3	0.99	0.91	0.76	0.98	0.59	0.26	0.92	0.2	0.87	0.32	1.24
ENSMUSG00000032311	chr9:55280890:55280983:-@chr9:55249096:55249169:-@chr9:55242061:55242207:-	0.67	0.13	0.98	0.36	0.01	0.87	0.67	0.13	0.98	0.49	0.13	0.87	0.31	1.23	0.18	0.88
NA	chr4:4138635:4138815:-@chr4:4138006:4138146:-@chr4:4133536:4134507:-	0.7	0.34	0.98	0.58	0.19	0.91	0.7	0.34	0.98	0.38	0.01	0.87	0.12	0.95	0.32	1.16
ENSMUSG00000034480	chrX:129821239:129821343:+@chrX:129825927:129825947:+@chrX:129902900:129903039:+	0.83	0.65	0.95	0.56	0.3	0.81	0.83	0.65	0.95	0.7	0.41	0.9	0.27	1.51	0.13	0.6
ENSMUSG00000018347	chr11:65807244:65807261:+@chr11:65807965:65808064:+@chr11:65814365:65814851:+	0.06	0.01	0.26	0.49	0.08	0.91	0.06	0.01	0.26	0.19	0.01	0.62	-0.43	1.71	-0.13	0.38
ENSMUSG00000041268	chr9:54380908:54381025:-@chr9:54379775:54379837:-@chr9:54378917:54379003:-	0.93	0.82	0.99	0.59	0.24	0.92	0.93	0.82	0.99	0.78	0.36	0.98	0.34	1.68	0.15	0.41
ENSMUSG00000072653	chr6:47945429:47945751:+@chr6:47945883:47945962:+@chr6:47948894:47949019:+	0.3	0.01	0.89	0.55	0.03	0.99	0.3	0.01	0.89	0.49	0.15	0.96	-0.25	1.02	-0.19	1.07
ENSMUSG00000024921	chr19:26748403:26748544:+@chr19:26749852:26749947:+@chr19:26751824:26752041:+	0.63	0.3	0.92	0.51	0.16	0.89	0.63	0.3	0.92	0.32	0.1	0.79	0.12	0.67	0.31	1.42
ENSMUSG00000037995	chr1:172484281:172484546:+@chr1:172484782:172484970:+@chr1:172489513:172489665:+	0.74	0.51	0.95	0.44	0.16	0.74	0.74	0.51	0.95	0.61	0.33	0.91	0.3	1.46	0.13	0.61
ENSMUSG00000058656	chr15:53860104:53860282:-@chr15:53719615:53719744:-@chr15:53658350:53658490:-	0.46	0.05	0.92	0.73	0.26	0.98	0.46	0.05	0.92	0.8	0.45	0.98	-0.27	0.93	-0.34	1.13
ENSMUSG00000032076	chr9:47813773:47813945:+@chr9:47829377:47829409:+@chr9:47836717:47836770:+	0.2	0.01	0.8	0.34	0.03	0.8	0.2	0.01	0.8	0.54	0.08	0.99	-0.14	0.8	-0.34	1.26
ENSMUSG00000001855	chr2:32042417:32042569:+@chr2:32047403:32047574:+@chr2:32051009:32051148:+	0.93	0.84	0.99	0.82	0.61	0.99	0.93	0.84	0.99	0.63	0.4	0.93	0.11	0.35	0.3	1.71
ENSMUSG00000068457	chrY:1239711:1239819:-@chrY:1224497:1224546:-@chrY:1199455:1199513:-	0.91	0.61	0.99	0.67	0.15	0.96	0.91	0.61	0.99	0.52	0.11	0.96	0.24	0.66	0.39	1.39
ENSMUSG00000072109	chr1:85105946:85106690:+@chr1:85111490:85111566:+@chr1:85111809:85111959:+	0.87	0.55	1	0.67	0.32	0.97	0.87	0.55	1	0.52	0.12	0.96	0.2	0.73	0.35	1.32
ENSMUSG00000029406	chr5:124125299:124125463:-@chr5:124124798:124124959:-@chr5:124123939:124124087:-	0.69	0.3	0.95	0.4	0.17	0.67	0.69	0.3	0.95	0.43	0.17	0.82	0.29	1.04	0.26	1.01
ENSMUSG00000021870	chr14:26459904:26459954:-@chr14:26453538:26453600:-@chr14:26442575:26442634:-	0.4	0.19	0.65	0.59	0.33	0.85	0.4	0.19	0.65	0.73	0.34	0.99	-0.19	0.76	-0.33	1.29
ENSMUSG00000066406	chr7:75677106:75677479:+@chr7:75679820:75679873:+@chr7:75683394:75683459:+	0.22	0.04	0.55	0.49	0.15	0.87	0.22	0.04	0.55	0.46	0.14	0.92	-0.27	1.22	-0.24	0.83
ENSMUSG00000071291,ENSMUSG00000097565	chr13:67500411:67500503:-@chr13:67499902:67499917:-@chr13:67494603:67494729:-	0.24	0.03	0.56	0.45	0.02	0.96	0.24	0.03	0.56	0.53	0.08	0.91	-0.21	0.9	-0.29	1.15
ENSMUSG00000041607	chr18:82575601:82575633:+@chr18:82578936:82579058:+@chr18:82584112:82585637:+	0.72	0.29	0.96	0.41	0.02	0.95	0.72	0.29	0.96	0.58	0.2	0.98	0.31	1.22	0.14	0.83
ENSMUSG00000087159	chrX:169323002:169323101:+@chrX:169330698:169330779:+@chrX:169360987:169361099:+	0.53	0.17	0.88	0.73	0.38	0.96	0.53	0.17	0.88	0.77	0.31	0.98	-0.2	1.09	-0.24	0.96
ENSMUSG00000014039	chr16:97835578:97835830:-@chr16:97829611:97829712:-@chr16:97821768:97822010:-	0.82	0.54	0.98	0.51	0.14	0.9	0.82	0.54	0.98	0.63	0.32	0.98	0.31	1.35	0.19	0.69
ENSMUSG00000032058	chr9:50883474:50883595:+@chr9:50891617:50891717:+@chr9:50892656:50894229:+	0.51	0.21	0.85	0.23	0.02	0.6	0.51	0.21	0.85	0.33	0.08	0.67	0.28	1.32	0.18	0.72
ENSMUSG00000026979	chr2:24385397:24385462:+@chr2:24386359:24386519:+@chr2:24394022:24395040:+	0.11	0.01	0.29	0.17	0.01	0.5	0.11	0.01	0.29	0.57	0.08	0.97	-0.06	0.41	-0.46	1.62
ENSMUSG00000024505	chr18:49724113:49724207:-@chr18:49723622:49723814:-@chr18:49700259:49700387:-	0.84	0.69	0.96	0.66	0.34	0.95	0.84	0.69	0.96	0.59	0.33	0.84	0.18	0.66	0.25	1.37
ENSMUSG00000034471	chr11:115813514:115813592:-@chr11:115812892:115812944:-@chr11:115811887:115812382:-	0.21	0.04	0.51	0.35	0.05	0.72	0.21	0.04	0.51	0.5	0.23	0.84	-0.14	0.61	-0.29	1.42
ENSMUSG00000000308	chr2:121358641:121359001:+@chr2:121359316:121359777:+@chr2:121359945:121360040:+	0.61	0.39	0.87	0.79	0.52	0.98	0.61	0.39	0.87	0.86	0.53	0.99	-0.18	0.82	-0.25	1.21
ENSMUSG00000078247	chr17:12741311:12741424:+@chr17:12779290:12779512:+@chr17:12814496:12815557:+	0.5	0.13	0.95	0.15	0.01	0.41	0.5	0.13	0.95	0.37	0.13	0.7	0.35	1.2	0.13	0.82
ENSMUSG00000034055	chrX:102532403:102532518:-@chrX:102532077:102532115:-@chrX:102520754:102520924:-	0.8	0.44	0.99	0.61	0.17	0.98	0.8	0.44	0.99	0.56	0.17	0.99	0.19	1.05	0.24	0.97
ENSMUSG00000021275	chr12:110889264:110889326:+@chr12:110895475:110895526:+@chr12:110896087:110896374:+	0.16	0.02	0.47	0.42	0.08	0.82	0.16	0.02	0.47	0.42	0.03	0.89	-0.26	1.05	-0.26	0.96
NA	chr10:39681473:39681549:-@chr10:39632950:39633016:-@chr10:39621411:39622727:-	0.32	0.04	0.9	0.59	0.23	0.89	0.32	0.04	0.9	0.54	0.14	0.88	-0.27	1.21	-0.22	0.8
ENSMUSG00000051705	chr9:59750578:59750649:-@chr9:59739940:59740051:-@chr9:59734259:59737868:-	0.39	0.19	0.67	0.63	0.36	0.88	0.39	0.19	0.67	0.61	0.34	0.9	-0.24	1.2	-0.22	0.81
NA	chr7:97579366:97579497:-@chr7:97558131:97558226:-@chr7:97550331:97550741:-	0.6	0.35	0.85	0.87	0.63	0.99	0.6	0.35	0.85	0.78	0.53	0.99	-0.27	1.16	-0.18	0.85
ENSMUSG00000042133	chr2:69723088:69723363:+@chr2:69731491:69731580:+@chr2:69731746:69731813:+	0.31	0.18	0.47	0.57	0.33	0.81	0.31	0.18	0.47	0.49	0.2	0.8	-0.26	1.25	-0.18	0.76
ENSMUSG00000020388	chr11:54055790:54055953:-@chr11:54055357:54055474:-@chr11:54054928:54055239:-	0.89	0.59	1	0.55	0.19	0.92	0.89	0.59	1	0.74	0.33	0.99	0.34	1.35	0.15	0.65
ENSMUSG00000040712	chr11:70683890:70684025:-@chr11:70683279:70683417:-@chr11:70682894:70683047:-	0.61	0.27	0.97	0.31	0.11	0.55	0.61	0.27	0.97	0.5	0.21	0.88	0.3	1.13	0.11	0.84
ENSMUSG00000033577	chr9:80292357:80292517:+@chr9:80293527:80293553:+@chr9:80296643:80296681:+	0.66	0.27	0.94	0.51	0.08	0.98	0.66	0.27	0.94	0.41	0.06	0.84	0.15	0.99	0.25	0.97
NA	chr13:13361298:13361422:-@chr13:13360828:13361072:-@chr13:13357620:13359423:-	0.61	0.45	0.77	0.42	0.23	0.73	0.61	0.45	0.77	0.4	0.19	0.6	0.19	0.92	0.21	1.03
ENSMUSG00000045083	chr4:36136454:36136486:-@chr4:36122141:36122180:-@chr4:36056642:36056804:-	0.23	0.03	0.6	0.53	0.03	0.97	0.23	0.03	0.6	0.38	0.02	0.85	-0.3	1.01	-0.15	0.94
ENSMUSG00000027201	chr2:125087677:125087703:-@chr2:125087543:125087589:-@chr2:125086271:125086716:-	0.09	0	0.29	0.35	0	0.92	0.09	0	0.29	0.36	0.04	0.87	-0.26	0.95	-0.27	0.99
ENSMUSG00000023764	chr11:3170587:3170704:-@chr11:3164557:3164713:-@chr11:3153432:3153498:-	0.82	0.54	0.99	0.52	0.14	0.92	0.82	0.54	0.99	0.69	0.3	0.94	0.3	1.32	0.13	0.62
ENSMUSG00000056917	chr19:5663604:5663707:-@chr19:5661596:5661626:-@chr19:5660314:5661111:-	0.67	0.3	0.94	0.52	0.19	0.84	0.67	0.3	0.94	0.41	0.12	0.78	0.15	0.7	0.26	1.24
ENSMUSG00000025237	chr9:59641024:59641096:+@chr9:59641741:59641810:+@chr9:59648830:59648909:+	0.19	0.06	0.39	0.38	0.07	0.8	0.19	0.06	0.39	0.51	0.12	0.89	-0.19	0.67	-0.32	1.26
ENSMUSG00000025885	chr18:74723757:74723857:+@chr18:74728871:74728948:+@chr18:74731645:74731843:+	0.17	0.02	0.49	0.4	0.12	0.82	0.17	0.02	0.49	0.43	0.12	0.86	-0.23	0.87	-0.26	1.06
ENSMUSG00000033788	chr6:84152333:84152409:+@chr6:84157139:84157201:+@chr6:84179672:84179770:+	0.3	0.13	0.49	0.59	0.26	0.85	0.3	0.13	0.49	0.47	0.24	0.73	-0.29	1.31	-0.17	0.62
ENSMUSG00000020389	chr11:52033514:52033611:+@chr11:52035947:52036020:+@chr11:52037431:52038165:+	0.32	0.05	0.65	0.53	0.14	0.96	0.32	0.05	0.65	0.57	0.22	0.93	-0.21	0.96	-0.25	0.97
ENSMUSG00000039065	chr15:31602116:31602149:+@chr15:31603449:31603574:+@chr15:31605911:31606188:+	0.13	0.03	0.34	0.3	0.1	0.55	0.13	0.03	0.34	0.4	0.13	0.79	-0.17	0.75	-0.27	1.18
ENSMUSG00000028344	chr4:48382105:48382278:+@chr4:48385105:48385272:+@chr4:48389959:48390139:+	0.81	0.53	0.96	0.65	0.31	0.96	0.81	0.53	0.96	0.54	0.19	0.84	0.16	0.71	0.27	1.22
ENSMUSG00000032384	chr9:65921004:65921068:+@chr9:65950016:65950064:+@chr9:65958329:65958721:+	0.31	0.14	0.57	0.52	0.22	0.87	0.31	0.14	0.57	0.57	0.29	0.9	-0.21	0.8	-0.26	1.12
NA	chr6:48593883:48594052:+@chr6:48594862:48594976:+@chr6:48596293:48599082:+	0.64	0.36	0.93	0.36	0.07	0.75	0.64	0.36	0.93	0.52	0.2	0.85	0.28	1.12	0.12	0.8
ENSMUSG00000059401	chrX:71117481:71119394:+@chrX:71121358:71121468:+@chrX:71146186:71146435:+	0.36	0.09	0.74	0.58	0.07	0.91	0.36	0.09	0.74	0.55	0.06	0.93	-0.22	1	-0.19	0.92
ENSMUSG00000003363	chr7:27552998:27553112:-@chr7:27549010:27549093:-@chr7:27542744:27542904:-	0.09	0.01	0.36	0.37	0.06	0.82	0.09	0.01	0.36	0.32	0.02	0.91	-0.28	1.3	-0.23	0.61
ENSMUSG00000028931	chr4:152400948:152401034:-@chr4:152400221:152400265:-@chr4:152396756:152396841:-	0.17	0	0.63	0.31	0.01	0.85	0.17	0	0.63	0.51	0.1	0.95	-0.14	0.72	-0.34	1.19
ENSMUSG00000053110	chr9:7952953:7953134:-@chr9:7950492:7950539:-@chr9:7939140:7939152:-	0.65	0.47	0.84	0.43	0.25	0.65	0.65	0.47	0.84	0.46	0.27	0.71	0.22	1.05	0.19	0.85
ENSMUSG00000024236	chr18:5059230:5059369:+@chr18:5060515:5060610:+@chr18:5062162:5062405:+	0.03	0	0.1	0.23	0.03	0.59	0.03	0	0.1	0.23	0.05	0.53	-0.2	0.6	-0.2	1.3
ENSMUSG00000029478	chr5:125178997:125179214:-@chr5:125153607:125153652:-@chr5:125124770:125124980:-	0.89	0.68	0.99	0.77	0.47	0.99	0.89	0.68	0.99	0.57	0.25	0.86	0.12	0.4	0.32	1.49
ENSMUSG00000037997	chr6:127470702:127470830:+@chr6:127471548:127471668:+@chr6:127474236:127474311:+	0.89	0.71	0.98	0.69	0.39	0.94	0.89	0.71	0.98	0.65	0.41	0.86	0.2	0.66	0.24	1.23
ENSMUSG00000043831	chr7:67223609:67223891:+@chr7:67224376:67224401:+@chr7:67225026:67228458:+	0.25	0.02	0.83	0.55	0.08	1	0.25	0.02	0.83	0.36	0.02	0.94	-0.3	1.09	-0.11	0.8
ENSMUSG00000025261	chrX:151803282:151803569:+@chrX:151803756:151803802:+@chrX:151804446:151804540:+	0.22	0.04	0.64	0.49	0.11	0.83	0.22	0.04	0.64	0.44	0.09	0.88	-0.27	1.17	-0.22	0.72
ENSMUSG00000019944	chr10:69249625:69249728:+@chr10:69266187:69266372:+@chr10:69269903:69270873:+	0.76	0.43	0.96	0.56	0.24	0.9	0.76	0.43	0.96	0.48	0.09	0.94	0.2	0.7	0.28	1.19
ENSMUSG00000028803	chr4:135463786:135463880:-@chr4:135454873:135454904:-@chr4:135448901:135452572:-	0.15	0.03	0.31	0.43	0.12	0.74	0.15	0.03	0.31	0.4	0.06	0.88	-0.28	1.12	-0.25	0.76
ENSMUSG00000042446	chr4:126910790:126911002:-@chr4:126907086:126907236:-@chr4:126906521:126906636:-	0.88	0.77	0.96	0.68	0.48	0.89	0.88	0.77	0.96	0.66	0.37	0.98	0.2	0.94	0.22	0.94
ENSMUSG00000039205	chr2:32363805:32363979:+@chr2:32365803:32365874:+@chr2:32367303:32367532:+	0.53	0.28	0.83	0.73	0.38	0.94	0.53	0.28	0.83	0.75	0.39	0.99	-0.2	1	-0.22	0.88
ENSMUSG00000029699	chr5:135962200:135962327:-@chr5:135961889:135961966:-@chr5:135960223:135961208:-	0.52	0.29	0.74	0.71	0.42	0.97	0.52	0.29	0.74	0.77	0.43	0.99	-0.19	0.65	-0.25	1.22
ENSMUSG00000046152	chr8:31187332:31187462:+@chr8:31188302:31188406:+@chr8:31194954:31195289:+	0.22	0.07	0.5	0.33	0.16	0.61	0.22	0.07	0.5	0.52	0.26	0.8	-0.11	0.49	-0.3	1.37
ENSMUSG00000058192	chr9:20588509:20588635:+@chr9:20589457:20589558:+@chr9:20590813:20590884:+	0.15	0.04	0.34	0.41	0.18	0.67	0.15	0.04	0.34	0.35	0.07	0.76	-0.26	1.27	-0.2	0.59
NA	chr17:56326050:56326229:+@chr17:56344334:56344442:+@chr17:56351633:56351797:+	0.08	0.02	0.21	0.3	0.04	0.58	0.08	0.02	0.21	0.35	0.08	0.79	-0.22	1.17	-0.27	0.68
ENSMUSG00000039153	chr17:44639665:44639826:-@chr17:44610028:44610093:-@chr17:44604001:44608383:-	0.37	0.08	0.76	0.55	0.11	0.93	0.37	0.08	0.76	0.64	0.31	0.92	-0.18	0.72	-0.27	1.13
ENSMUSG00000027574	chr2:180944077:180944214:-@chr2:180943741:180943821:-@chr2:180943030:180943227:-	0.91	0.71	0.99	0.7	0.25	0.92	0.91	0.71	0.99	0.64	0.15	0.96	0.21	0.76	0.27	1.08
ENSMUSG00000050587	chr2:97467674:97468420:+@chr2:97603489:97603540:+@chr2:97628989:97631664:+	0.46	0.06	0.84	0.67	0.26	0.93	0.46	0.06	0.84	0.7	0.19	0.98	-0.21	0.83	-0.24	1
ENSMUSG00000031480	chr8:22242997:22243956:+@chr8:22252153:22252311:+@chr8:22258292:22261332:+	0.44	0.08	0.87	0.67	0.27	0.95	0.44	0.08	0.87	0.65	0.32	0.96	-0.23	1.01	-0.21	0.81
ENSMUSG00000071176	chr8:14940209:14940372:+@chr8:14942610:14942726:+@chr8:14945280:14945394:+	0.66	0.39	0.87	0.45	0.23	0.66	0.66	0.39	0.87	0.43	0.22	0.67	0.21	0.79	0.23	1.02
ENSMUSG00000030166	chr6:119902698:119902835:+@chr6:119911048:119911141:+@chr6:119915967:119916042:+	0.85	0.61	0.99	0.71	0.23	0.96	0.85	0.61	0.99	0.57	0.19	0.9	0.14	0.54	0.28	1.26
ENSMUSG00000028708	chr4:115839246:115839281:+@chr4:115845622:115845665:+@chr4:115848220:115848362:+	0.13	0.02	0.32	0.43	0.13	0.77	0.13	0.02	0.32	0.24	0.01	0.71	-0.3	1.34	-0.11	0.45
ENSMUSG00000036109	chrX:51205774:51205832:-@chrX:51164418:51164664:-@chrX:51139204:51139368:-	0.88	0.59	1	0.72	0.39	0.99	0.88	0.59	1	0.51	0.17	0.93	0.16	0.54	0.37	1.24
ENSMUSG00000071646	chr19:8942493:8942719:+@chr19:8942920:8943032:+@chr19:8943465:8943532:+	0.76	0.47	0.96	0.57	0.19	0.94	0.76	0.47	0.96	0.51	0.17	0.86	0.19	0.86	0.25	0.92
NA	chr4:107822934:107823022:-@chr4:107815927:107816067:-@chr4:107810763:107810946:-	0.57	0.25	0.85	0.79	0.42	0.99	0.57	0.25	0.85	0.81	0.57	0.98	-0.22	1.01	-0.24	0.76
ENSMUSG00000026836	chr2:58516024:58516300:-@chr2:58507277:58507521:-@chr2:58500484:58500557:-	0.09	0.02	0.24	0.37	0.09	0.7	0.09	0.02	0.24	0.25	0.05	0.61	-0.28	1.31	-0.16	0.45
ENSMUSG00000040473	chr5:5625750:5625927:-@chr5:5621920:5622043:-@chr5:5619167:5619215:-	0.83	0.56	0.99	0.57	0.16	0.89	0.83	0.56	0.99	0.66	0.25	0.96	0.26	0.88	0.17	0.87
NA	chr5:139406387:139406572:+@chr5:139410833:139412347:+@chr5:139414273:139416092:+	0.14	0.01	0.47	0.41	0.05	0.95	0.14	0.01	0.47	0.41	0.07	0.96	-0.27	0.81	-0.27	0.93
ENSMUSG00000061536	chr9:121695534:121695742:-@chr9:121692910:121693073:-@chr9:121690236:121690415:-	0.61	0.36	0.87	0.42	0.18	0.77	0.61	0.36	0.87	0.34	0.09	0.67	0.19	0.78	0.27	0.96
ENSMUSG00000001065,ENSMUSG00000092329	chr8:123255707:123256010:+@chr8:123256284:123256330:+@chr8:123256419:123256865:+	0.9	0.66	1	0.65	0.29	0.93	0.9	0.66	1	0.69	0.31	0.95	0.25	1.02	0.21	0.72
ENSMUSG00000050605	chr7:24294955:24295081:-@chr7:24293345:24293434:-@chr7:24291046:24292504:-	0.87	0.64	0.99	0.65	0.3	0.99	0.87	0.64	0.99	0.64	0.23	0.99	0.22	0.8	0.23	0.94
ENSMUSG00000025766	chr3:41742618:41742689:+@chr3:41744696:41744812:+@chr3:41746548:41746728:+	0.78	0.37	0.99	0.62	0.25	0.92	0.78	0.37	0.99	0.5	0.14	0.96	0.16	0.78	0.28	0.96
ENSMUSG00000022629	chr15:90956295:90956509:-@chr15:90952711:90952818:-@chr15:90951246:90951374:-	0.9	0.7	0.99	0.61	0.18	0.95	0.9	0.7	0.99	0.68	0.37	0.94	0.29	0.98	0.22	0.75
ENSMUSG00000032878	chr11:28434081:28434157:-@chr11:28396046:28396165:-@chr11:28385692:28388948:-	0.18	0.03	0.44	0.56	0.07	0.96	0.18	0.03	0.44	0.25	0.01	0.79	-0.38	1.3	-0.07	0.43
ENSMUSG00000028602	chr4:145277526:145277551:-@chr4:145274283:145274496:-@chr4:145268976:145269235:-	0.75	0.43	0.95	0.5	0.17	0.89	0.75	0.43	0.95	0.57	0.19	0.95	0.25	0.94	0.18	0.79
ENSMUSG00000013033	chr8:83924151:83924355:+@chr8:83926262:83926276:+@chr8:83929464:83930264:+	0.24	0.01	0.7	0.41	0.02	0.97	0.24	0.01	0.7	0.5	0.01	0.99	-0.17	0.81	-0.26	0.91
ENSMUSG00000024387	chr17:35121794:35122053:-@chr17:35121311:35121511:-@chr17:35120445:35120527:-	0.73	0.38	0.99	0.5	0.17	0.83	0.73	0.38	0.99	0.48	0.18	0.85	0.23	0.85	0.25	0.87
ENSMUSG00000022607	chr15:73394648:73394744:-@chr15:73392344:73392447:-@chr15:73391759:73391880:-	0.53	0.27	0.84	0.71	0.43	0.96	0.53	0.27	0.84	0.76	0.49	0.98	-0.18	0.76	-0.23	0.96
ENSMUSG00000031093	chrX:36009339:36009450:+@chrX:36009943:36009981:+@chrX:36011632:36011810:+	0.29	0.15	0.46	0.44	0.2	0.74	0.29	0.15	0.46	0.56	0.22	0.9	-0.15	0.59	-0.27	1.12
ENSMUSG00000048402	chr1:119002040:119002206:-@chr1:118964450:118964560:-@chr1:118890296:118890401:-	0.19	0.05	0.41	0.47	0.09	0.89	0.19	0.05	0.41	0.32	0.04	0.77	-0.28	1.05	-0.13	0.64
ENSMUSG00000021809	chr14:20306232:20306366:+@chr14:20307233:20307364:+@chr14:20307693:20307799:+	0.8	0.52	0.97	0.61	0.25	0.91	0.8	0.52	0.97	0.58	0.25	0.9	0.19	0.83	0.22	0.85
ENSMUSG00000020319	chr11:21572281:21572370:+@chr11:21648070:21648123:+@chr11:21652226:21652310:+	0.17	0.01	0.54	0.53	0.12	0.93	0.17	0.01	0.54	0.22	0.02	0.6	-0.36	1.24	-0.05	0.44
ENSMUSG00000051705	chr9:59750578:59750649:-@chr9:59750262:59750371:-@chr9:59739940:59740032:-	0.61	0.29	0.89	0.48	0.23	0.74	0.61	0.29	0.89	0.34	0.08	0.63	0.13	0.62	0.27	1.05
ENSMUSG00000028886	chr4:132661895:132661938:+@chr4:132670189:132670215:+@chr4:132689705:132689790:+	0.18	0.01	0.41	0.41	0.04	0.9	0.18	0.01	0.41	0.43	0.14	0.82	-0.23	0.84	-0.25	0.81
ENSMUSG00000054477	chr18:45561221:45561316:+@chr18:45592006:45592424:+@chr18:45655198:45655339:+	0.91	0.75	0.99	0.64	0.27	0.94	0.91	0.75	0.99	0.73	0.49	0.93	0.27	0.85	0.18	0.8
ENSMUSG00000030465	chr8:67719900:67720044:-@chr8:67713683:67713826:-@chr8:67689082:67697187:-	0.65	0.35	0.91	0.89	0.63	0.98	0.65	0.35	0.91	0.85	0.65	0.98	-0.24	0.72	-0.2	0.93
ENSMUSG00000036825	chr3:146404642:146404935:+@chr3:146414696:146414799:+@chr3:146417607:146417790:+	0.28	0.1	0.53	0.41	0.08	0.86	0.28	0.1	0.53	0.55	0.17	0.95	-0.13	0.76	-0.27	0.89
ENSMUSG00000016200	chr1:192901752:192901941:-@chr1:192898851:192898907:-@chr1:192897307:192897620:-	0.1	0	0.32	0.31	0.02	0.71	0.1	0	0.32	0.34	0.08	0.89	-0.21	0.75	-0.24	0.89
ENSMUSG00000064120	chr17:49452211:49452331:+@chr17:49452795:49452842:+@chr17:49454030:49455430:+	0.89	0.69	0.99	0.74	0.4	0.98	0.89	0.69	0.99	0.64	0.32	0.91	0.15	0.53	0.25	1.11
ENSMUSG00000032827	chr6:5156121:5156240:+@chr6:5157004:5157027:+@chr6:5158089:5158271:+	0.74	0.51	0.97	0.5	0.2	0.81	0.74	0.51	0.97	0.56	0.13	0.9	0.24	0.81	0.18	0.8
NA	chr6:47164140:47164233:-@chr6:47163688:47163808:-@chr6:47160744:47161067:-	0.34	0.05	0.81	0.1	0.02	0.35	0.34	0.05	0.81	0.06	0	0.27	0.24	0.72	0.28	0.89
ENSMUSG00000092511	chr17:34863345:34863474:-@chr17:34863179:34863228:-@chr17:34862602:34863031:-	0.62	0.17	0.93	0.79	0.44	0.99	0.62	0.17	0.93	0.85	0.6	0.99	-0.17	0.85	-0.23	0.75
ENSMUSG00000042359	chr2:76594764:76594886:+@chr2:76595264:76595408:+@chr2:76595874:76600647:+	0.48	0.13	0.88	0.28	0.02	0.73	0.48	0.13	0.88	0.25	0.02	0.63	0.2	0.8	0.23	0.79
ENSMUSG00000000085	chr4:120453752:120453775:+@chr4:120462013:120462155:+@chr4:120463075:120463145:+	0.83	0.6	0.98	0.63	0.22	0.91	0.83	0.6	0.98	0.61	0.12	0.98	0.2	0.77	0.22	0.82
ENSMUSG00000024371	chr17:34895407:34895567:-@chr17:34894895:34894935:-@chr17:34893611:34893700:-	0.1	0.02	0.31	0.4	0.06	0.82	0.1	0.02	0.31	0.32	0.04	0.71	-0.3	0.84	-0.22	0.74
NA	chr9:107568326:107568415:-@chr9:107566524:107566868:-@chr9:107562338:107563913:-	0.17	0.02	0.52	0.38	0.04	0.93	0.17	0.02	0.52	0.39	0.1	0.91	-0.21	0.75	-0.22	0.83
ENSMUSG00000043831	chr7:67223609:67223891:+@chr7:67224376:67224401:+@chr7:67225864:67228468:+	0.13	0.02	0.36	0.35	0.04	0.75	0.13	0.02	0.36	0.35	0.04	0.83	-0.22	0.76	-0.22	0.81
ENSMUSG00000029822	chr6:50455825:50456170:-@chr6:50428329:50428420:-@chr6:50370123:50370358:-	0.95	0.83	1	0.67	0.34	0.93	0.95	0.83	1	0.81	0.54	0.98	0.28	1.11	0.14	0.46
ENSMUSG00000004221	chrX:74393291:74393405:+@chrX:74427762:74427902:+@chrX:74432805:74433006:+	0.25	0.07	0.53	0.57	0.17	0.95	0.25	0.07	0.53	0.34	0.08	0.8	-0.32	1.04	-0.09	0.52
ENSMUSG00000022436	chr15:78910008:78910093:+@chr15:78911533:78911711:+@chr15:78911930:78912052:+	0.9	0.73	0.99	0.72	0.37	0.95	0.9	0.73	0.99	0.66	0.34	0.91	0.18	0.58	0.24	0.97
NA	chr17:62613837:62613902:-@chr17:62613316:62613396:-@chr17:62602957:62607463:-	0.88	0.63	1	0.66	0.35	0.93	0.88	0.63	1	0.65	0.23	0.97	0.22	0.8	0.23	0.74
NA	chr4:117121414:117121482:-@chr4:117121198:117121329:-@chr4:117119218:117120861:-	0.37	0.24	0.52	0.62	0.36	0.98	0.37	0.24	0.52	0.52	0.26	0.84	-0.25	0.98	-0.15	0.55
ENSMUSG00000031169	chrX:8203159:8203289:-@chrX:8203026:8203043:-@chrX:8201658:8201672:-	0.85	0.62	0.98	0.5	0.04	0.98	0.85	0.62	0.98	0.68	0.29	0.94	0.35	0.95	0.17	0.58
ENSMUSG00000014592	chr4:151073988:151074062:-@chr4:151071426:151071456:-@chr4:151059523:151062855:-	0.14	0.02	0.44	0.27	0.01	0.67	0.14	0.02	0.44	0.44	0.06	1	-0.13	0.59	-0.3	0.93
ENSMUSG00000057715	chr1:11414105:11414637:+@chr1:11511918:11512065:+@chr1:11518578:11518709:+	0.88	0.64	1	0.6	0.14	0.95	0.88	0.64	1	0.75	0.38	0.97	0.28	1.05	0.13	0.44
ENSMUSG00000036834	chr3:63701784:63702138:-@chr3:63699520:63699542:-@chr3:63696234:63699480:-	0.18	0.02	0.58	0.4	0.06	0.79	0.18	0.02	0.58	0.36	0.04	0.74	-0.22	0.85	-0.18	0.64
ENSMUSG00000052512	chr7:49408633:49408906:+@chr7:49412826:49412894:+@chr7:49420174:49420340:+	0.04	0	0.13	0.32	0.02	0.76	0.04	0	0.13	0.26	0.03	0.77	-0.28	0.91	-0.22	0.57
ENSMUSG00000000730	chr10:78055335:78055716:+@chr10:78056412:78056750:+@chr10:78056845:78056920:+	0.89	0.7	0.99	0.62	0.26	0.93	0.89	0.7	0.99	0.73	0.25	0.99	0.27	0.96	0.16	0.52
ENSMUSG00000056260	chr3:106721682:106722106:+@chr3:106722857:106722969:+@chr3:106731671:106732063:+	0.07	0	0.22	0.27	0.05	0.69	0.07	0	0.22	0.31	0.06	0.78	-0.2	0.64	-0.24	0.83
NA	chr4:147848278:147848375:-@chr4:147833215:147833246:-@chr4:147828670:147828796:-	0.11	0	0.34	0.42	0.02	0.95	0.11	0	0.34	0.2	0.01	0.56	-0.31	1.05	-0.09	0.41
ENSMUSG00000023927	chr17:51742646:51742849:-@chr17:51742047:51742142:-@chr17:51739476:51740410:-	0.13	0.02	0.36	0.32	0.03	0.74	0.13	0.02	0.36	0.36	0.01	0.8	-0.19	0.78	-0.23	0.67
NA	chr9:96765562:96765678:+@chr9:96769618:96769735:+@chr9:96769951:96770096:+	0.82	0.51	0.99	0.6	0.2	0.95	0.82	0.51	0.99	0.62	0.21	0.97	0.22	0.82	0.2	0.63
ENSMUSG00000000296	chr10:31346611:31346712:-@chr10:31343012:31343026:-@chr10:31341140:31341178:-	0.11	0.01	0.38	0.3	0.06	0.71	0.11	0.01	0.38	0.32	0.04	0.71	-0.19	0.68	-0.21	0.76
ENSMUSG00000073406	chr17:36083233:36083508:-@chr17:36081242:36081517:-@chr17:36080999:36081115:-	0.88	0.65	0.99	0.78	0.51	0.97	0.88	0.65	0.99	0.55	0.12	0.93	0.1	0.5	0.33	0.93
ENSMUSG00000034903	chr2:65238363:65238626:-@chr2:65193026:65193113:-@chr2:65150979:65151167:-	0.12	0	0.37	0.22	0.01	0.67	0.12	0	0.37	0.49	0.01	0.98	-0.1	0.38	-0.37	1.04
ENSMUSG00000028894	chr4:124769222:124769455:+@chr4:124775597:124775706:+@chr4:124777341:124777437:+	0.43	0.01	0.99	0.24	0.03	0.68	0.43	0.01	0.99	0.19	0.03	0.53	0.19	0.75	0.24	0.67
ENSMUSG00000037636	chrX:36757768:36757940:+@chrX:36761684:36761694:+@chrX:36775482:36775616:+	0.16	0.03	0.37	0.42	0.09	0.84	0.16	0.03	0.37	0.3	0.03	0.74	-0.26	0.95	-0.14	0.47
ENSMUSG00000020300	chr11:31908825:31908875:+@chr11:31918801:31918824:+@chr11:31920409:31920582:+	0.11	0.01	0.34	0.35	0.03	0.88	0.11	0.01	0.34	0.38	0.01	0.87	-0.24	0.68	-0.27	0.73
ENSMUSG00000045917	chr4:63569944:63570093:+@chr4:63577801:63577911:+@chr4:63579933:63580013:+	0.91	0.75	0.99	0.6	0.2	0.95	0.91	0.75	0.99	0.8	0.51	0.98	0.31	1.01	0.11	0.4
ENSMUSG00000020564	chr12:33217712:33217816:+@chr12:33311592:33311714:+@chr12:33325911:33326133:+	0.12	0.01	0.42	0.4	0.05	0.87	0.12	0.01	0.42	0.33	0.01	0.97	-0.28	0.79	-0.21	0.59
ENSMUSG00000008489	chr4:91375936:91376496:-@chr4:91311573:91311663:-@chr4:91308611:91308854:-	0.14	0.01	0.43	0.32	0.01	0.81	0.14	0.01	0.43	0.42	0.05	0.91	-0.18	0.58	-0.28	0.8
ENSMUSG00000027361	chr2:126675295:126675352:-@chr2:126662991:126663088:-@chr2:126658470:126658577:-	0.15	0.06	0.28	0.4	0.09	0.99	0.15	0.06	0.28	0.36	0.13	0.77	-0.25	0.71	-0.21	0.67
ENSMUSG00000023923	chr17:50966552:50966626:-@chr17:50965893:50966058:-@chr17:50963693:50963760:-	0.28	0.04	0.68	0.05	0.01	0.16	0.28	0.04	0.68	0.06	0	0.21	0.23	0.68	0.22	0.7
ENSMUSG00000027259	chr2:121143149:121143209:+@chr2:121146033:121146120:+@chr2:121150220:121150346:+	0.94	0.85	0.99	0.8	0.51	0.98	0.94	0.85	0.99	0.65	0.23	1	0.14	0.48	0.29	0.9
ENSMUSG00000026005	chr1:66700884:66701017:+@chr1:66701617:66701648:+@chr1:66706446:66706525:+	0.13	0.03	0.35	0.3	0.08	0.65	0.13	0.03	0.35	0.39	0.09	0.94	-0.17	0.63	-0.26	0.74
ENSMUSG00000049321	chr11:50906086:50906157:-@chr11:50905606:50905686:-@chr11:50898712:50901291:-	0.18	0.05	0.44	0.36	0.04	0.99	0.18	0.05	0.44	0.43	0.15	0.72	-0.18	0.56	-0.25	0.8
ENSMUSG00000097393	chr8:109075223:109075744:+@chr8:109171821:109172046:+@chr8:109177693:109177814:+	0.07	0	0.27	0.21	0.01	0.56	0.07	0	0.27	0.38	0.03	0.91	-0.14	0.4	-0.31	0.95
ENSMUSG00000028487	chr4:84291693:84293662:-@chr4:84291264:84291325:-@chr4:84277906:84277939:-	0.15	0.01	0.43	0.39	0.07	0.88	0.15	0.01	0.43	0.34	0.05	0.92	-0.24	0.69	-0.19	0.63
ENSMUSG00000042608	chr4:126103957:126104146:+@chr4:126117464:126117750:+@chr4:126118274:126118340:+	0.07	0.01	0.26	0.22	0.01	0.62	0.07	0.01	0.26	0.32	0.04	0.65	-0.15	0.44	-0.25	0.86
ENSMUSG00000034903	chr2:65238363:65238626:-@chr2:65171835:65171930:-@chr2:65150979:65151167:-	0.09	0.01	0.4	0.32	0.05	0.76	0.09	0.01	0.4	0.28	0.04	0.69	-0.23	0.63	-0.19	0.64
ENSMUSG00000075415	chr2:31052985:31053137:-@chr2:31048205:31048288:-@chr2:31044882:31044896:-	0.1	0.02	0.31	0.22	0	0.75	0.1	0.02	0.31	0.39	0.05	0.86	-0.12	0.48	-0.29	0.77
ENSMUSG00000036473	chr17:24199891:24199957:-@chr17:24198355:24198526:-@chr17:24189944:24190053:-	0.03	0	0.09	0.13	0.02	0.51	0.03	0	0.09	0.34	0.05	0.8	-0.1	0.24	-0.31	0.97
ENSMUSG00000064302	chr1:118531978:118532085:+@chr1:118536135:118536197:+@chr1:118539266:118539369:+	0.09	0	0.35	0.26	0.02	0.77	0.09	0	0.35	0.32	0.03	0.84	-0.17	0.44	-0.23	0.66
ENSMUSG00000055240	chr17:33394240:33394378:-@chr17:33393787:33394012:-@chr17:33386685:33386811:-	0.1	0.01	0.32	0.35	0.04	0.81	0.1	0.01	0.32	0.25	0.02	0.91	-0.25	0.67	-0.15	0.42
ENSMUSG00000039262	chr2:32212075:32212291:+@chr2:32212887:32214947:+@chr2:32216046:32216233:+	0.11	0.09	0.12	0.26	0.22	0.3	0.11	0.09	0.12	0.23	0.2	0.27	-0.15	1000000000000	-0.12	1000000000000
ENSMUSG00000025290	chr14:24493383:24493493:+@chr14:24495430:24495449:+@chr14:24495775:24496146:+	0.14	0.13	0.15	0.25	0.23	0.27	0.14	0.13	0.15	0.22	0.2	0.24	-0.11	1000000000000	-0.08	1000000000000
ENSMUSG00000026193	chr1:71615360:71615551:-@chr1:71613763:71614035:-@chr1:71612468:71612650:-	0.55	0.53	0.58	0.44	0.41	0.47	0.55	0.53	0.58	0.45	0.42	0.48	0.11	1000000000000	0.1	1000000000000
NA	chr15:103243959:103244028:+@chr15:103244256:103245966:+@chr15:103246346:103246421:+	0.84	0.83	0.86	0.71	0.68	0.73	0.84	0.83	0.86	0.71	0.68	0.74	0.13	1000000000000	0.13	1000000000000
ENSMUSG00000071172	chr17:29038490:29038624:+@chr17:29039454:29039909:+@chr17:29040775:29040813:+	0.09	0.08	0.1	0.22	0.17	0.27	0.09	0.08	0.1	0.3	0.24	0.37	-0.13	542929954485	-0.21	1000000000000
ENSMUSG00000005610	chr7:111076696:111076856:-@chr7:111076280:111076393:-@chr7:111075587:111075712:-	0.89	0.87	0.91	0.8	0.77	0.83	0.89	0.87	0.91	0.78	0.75	0.81	0.09	2.49091e+11	0.11	1000000000000
ENSMUSG00000028693	chr4:116611972:116612081:-@chr4:116610403:116611377:-@chr4:116605684:116605763:-	0.7	0.68	0.72	0.62	0.59	0.65	0.7	0.68	0.72	0.59	0.57	0.62	0.08	1.18466e+11	0.11	1000000000000
ENSMUSG00000021131	chr12:80643764:80643861:-@chr12:80642789:80642845:-@chr12:80640957:80641044:-	0.07	0.06	0.08	0.13	0.11	0.15	0.07	0.06	0.08	0.14	0.12	0.16	-0.06	7.96111e+09	-0.07	1000000000000
ENSMUSG00000003778	chr18:34609805:34609949:-@chr18:34608418:34608627:-@chr18:34607775:34608055:-	0.89	0.83	0.93	0.59	0.48	0.71	0.89	0.83	0.93	0.48	0.37	0.6	0.3	2.0346e+08	0.41	1000000000000
ENSMUSG00000024097	chr17:80205262:80205438:-@chr17:80204622:80205081:-@chr17:80204313:80204387:-	0.16	0.15	0.17	0.12	0.11	0.13	0.16	0.15	0.17	0.12	0.11	0.13	0.04	1000000000000	0.04	3831.57
NA	chr3:34064119:34064319:+@chr3:34068161:34068252:+@chr3:34068917:34069344:+	0.46	0.43	0.49	0.61	0.56	0.66	0.46	0.43	0.49	0.58	0.54	0.63	-0.15	3.62425e+11	-0.12	8187.52
ENSMUSG00000040025	chr4:132210752:132210831:-@chr4:132204132:132205715:-@chr4:132184916:132186947:-	0.99	0.99	1	0.93	0.89	0.95	0.99	0.99	1	0.93	0.9	0.96	0.06	2.05022e+11	0.06	890867
ENSMUSG00000020594	chr12:8728856:8729149:+@chr12:8733273:8733509:+@chr12:8743761:8744028:+	0.42	0.37	0.48	0.23	0.17	0.28	0.42	0.37	0.48	0.22	0.17	0.28	0.19	63094.3	0.2	6.27553e+10
ENSMUSG00000029328	chr5:100036104:100036195:-@chr5:100035635:100035739:-@chr5:100033579:100034984:-	0.26	0.23	0.29	0.37	0.32	0.43	0.26	0.23	0.29	0.43	0.37	0.5	-0.11	92.95	-0.17	8.04361e+08
ENSMUSG00000056692	chr17:27786071:27786268:-@chr17:27767911:27768239:-@chr17:27751232:27753995:-	0.91	0.87	0.94	0.74	0.67	0.81	0.91	0.87	0.94	0.69	0.61	0.77	0.17	121.26	0.22	7.92845e+08
ENSMUSG00000030189	chr6:131379358:131379480:-@chr6:131375974:131376180:-@chr6:131370323:131370414:-	0.56	0.53	0.59	0.47	0.42	0.51	0.56	0.53	0.59	0.43	0.38	0.47	0.09	9.88	0.13	1.88136e+08
ENSMUSG00000040731	chr5:134625366:134625462:-@chr5:134624441:134624500:-@chr5:134621949:134622086:-	0.73	0.69	0.77	0.89	0.85	0.92	0.73	0.69	0.77	0.87	0.83	0.91	-0.16	1.71084e+08	-0.14	6.5372e+06
NA	chr4:141139692:141139796:-@chr4:141120324:141120373:-@chr4:141118527:141118778:-	0.76	0.69	0.83	0.95	0.9	0.98	0.76	0.69	0.83	0.9	0.83	0.95	-0.19	7.54165e+06	-0.14	3.31
ENSMUSG00000032481	chr9:110234877:110235053:+@chr9:110236716:110236828:+@chr9:110237819:110240178:+	0.03	0.02	0.05	0.14	0.08	0.2	0.03	0.02	0.05	0.2	0.12	0.28	-0.11	442.64	-0.17	4.42807e+06
ENSMUSG00000024422	chr17:35889439:35889600:+@chr17:35890915:35891088:+@chr17:35892419:35892668:+	0.98	0.97	0.99	0.92	0.9	0.94	0.98	0.97	0.99	0.93	0.91	0.95	0.06	1.7419e+06	0.05	15.52
ENSMUSG00000020358	chr11:51602593:51602695:-@chr11:51601750:51601890:-@chr11:51600100:51601478:-	0.43	0.41	0.44	0.4	0.38	0.42	0.43	0.41	0.44	0.36	0.34	0.38	0.03	0.22	0.07	1.34341e+06
ENSMUSG00000030695	chr7:126799045:126799254:-@chr7:126797974:126798126:-@chr7:126797644:126797776:-	0.06	0.05	0.06	0.03	0.03	0.04	0.06	0.05	0.06	0.04	0.03	0.04	0.03	410349	0.02	3.87
ENSMUSG00000021824	chr14:21052140:21052442:-@chr14:21045488:21045763:-@chr14:21040953:21041090:-	0.95	0.92	0.97	0.76	0.68	0.84	0.95	0.92	0.97	0.81	0.72	0.88	0.19	270909	0.14	39.6
ENSMUSG00000047613	chr4:153957237:153957322:+@chr4:153959756:153959862:+@chr4:153960531:153960992:+	0.92	0.87	0.96	0.77	0.67	0.86	0.92	0.87	0.96	0.72	0.62	0.8	0.15	13.51	0.2	203034
ENSMUSG00000031948	chr8:112011210:112011305:-@chr8:112008207:112008386:-@chr8:112005632:112005788:-	0.17	0.15	0.19	0.1	0.08	0.12	0.17	0.15	0.19	0.13	0.1	0.15	0.07	173953	0.04	0.92
ENSMUSG00000029422	chr5:123749289:123749412:-@chr5:123745497:123745589:-@chr5:123744955:123745111:-	0.17	0.13	0.21	0.37	0.29	0.46	0.17	0.13	0.21	0.27	0.21	0.34	-0.2	148548	-0.1	3.41
ENSMUSG00000052429	chr7:44986283:44986420:-@chr7:44984080:44984133:-@chr7:44983486:44983587:-	0.12	0.1	0.13	0.18	0.16	0.21	0.12	0.1	0.13	0.19	0.16	0.22	-0.06	33042.5	-0.07	105276
ENSMUSG00000001418	chr3:88325023:88325201:+@chr3:88325677:88325931:+@chr3:88326115:88326312:+	0.97	0.94	0.99	0.84	0.79	0.9	0.97	0.94	0.99	0.85	0.8	0.9	0.13	39606.9	0.12	11741.6
ENSMUSG00000017421	chr11:80391835:80391992:+@chr11:80393084:80393176:+@chr11:80394286:80394531:+	0.2	0.18	0.22	0.11	0.08	0.14	0.2	0.18	0.22	0.11	0.08	0.14	0.09	22311	0.09	16352.1
ENSMUSG00000032712	chr6:149317635:149317708:+@chr6:149324732:149324800:+@chr6:149325405:149329784:+	0.29	0.22	0.36	0.08	0.03	0.15	0.29	0.22	0.36	0.13	0.07	0.24	0.21	25258.7	0.16	1.83
ENSMUSG00000029422	chr5:123749289:123749412:-@chr5:123746772:123746870:-@chr5:123745497:123745589:-	0.07	0.05	0.11	0.24	0.16	0.34	0.07	0.05	0.11	0.25	0.17	0.34	-0.17	1242.11	-0.18	21028.7
NA	chr9:27006352:27006447:+@chr9:27006801:27006951:+@chr9:27007158:27007334:+	0.44	0.4	0.47	0.34	0.3	0.39	0.44	0.4	0.47	0.31	0.26	0.35	0.1	18.5	0.13	18366.2
ENSMUSG00000023286	chr4:155943831:155944150:+@chr4:155946255:155946417:+@chr4:155949007:155949137:+	0.65	0.6	0.7	0.83	0.76	0.88	0.65	0.6	0.7	0.79	0.73	0.85	-0.18	11622.2	-0.14	30.61
ENSMUSG00000026254	chr1:87213914:87214019:+@chr1:87214346:87214495:+@chr1:87219581:87219695:+	0.56	0.53	0.6	0.46	0.41	0.5	0.56	0.53	0.6	0.42	0.38	0.47	0.1	18.62	0.14	11032.8
ENSMUSG00000036086	chr1:127967878:127967969:-@chr1:127965781:127966333:-@chr1:127965063:127965164:-	0.18	0.11	0.26	0.03	0.01	0.06	0.18	0.11	0.26	0.06	0.02	0.14	0.15	9779.94	0.12	1.33
ENSMUSG00000039361	chr7:90191654:90191753:+@chr7:90194273:90194296:+@chr7:90195655:90195714:+	0.2	0.16	0.25	0.2	0.15	0.26	0.2	0.16	0.25	0.37	0.3	0.45	0	0.09	-0.17	5293.44
ENSMUSG00000049550	chr5:123617336:123617551:-@chr5:123613068:123615335:-@chr5:123611822:123611938:-	0.32	0.24	0.4	0.18	0.12	0.26	0.32	0.24	0.4	0.15	0.1	0.2	0.14	2.82	0.17	1910.58
ENSMUSG00000024283	chr18:7905932:7906044:+@chr18:7910516:7910824:+@chr18:7916052:7916297:+	0.77	0.71	0.83	0.61	0.53	0.69	0.77	0.71	0.83	0.55	0.47	0.63	0.16	11.28	0.22	1774.59
ENSMUSG00000020166	chr10:116507041:116507188:-@chr10:116506229:116506411:-@chr10:116504035:116504114:-	0.98	0.94	1	0.94	0.82	1	0.98	0.94	1	0.78	0.66	0.89	0.04	0.09	0.2	1199.6
ENSMUSG00000027829	chr3:65956853:65956962:-@chr3:65955130:65955276:-@chr3:65951434:65951554:-	0.2	0.16	0.24	0.31	0.22	0.4	0.2	0.16	0.24	0.4	0.3	0.51	-0.11	1.14	-0.2	913.03
NA	chr5:99962515:99962612:-@chr5:99962098:99962204:-@chr5:99955936:99961333:-	0.03	0.02	0.04	0.08	0.06	0.11	0.03	0.02	0.04	0.06	0.04	0.09	-0.05	905.21	-0.03	0.6
ENSMUSG00000035455	chr11:11808895:11808962:-@chr11:11806096:11806215:-@chr11:11800288:11803063:-	0.55	0.47	0.64	0.63	0.5	0.78	0.55	0.47	0.64	0.82	0.69	0.92	-0.08	0.34	-0.27	547.04
ENSMUSG00000023942	chr17:45595482:45595572:-@chr17:45593332:45593563:-@chr17:45592179:45592261:-	0.5	0.44	0.55	0.43	0.35	0.5	0.5	0.44	0.55	0.31	0.25	0.39	0.07	0.35	0.19	520.02
ENSMUSG00000038975	chr3:153910261:153910366:-@chr3:153910064:153910161:-@chr3:153909546:153909598:-	0.39	0.34	0.43	0.34	0.27	0.42	0.39	0.34	0.43	0.24	0.18	0.3	0.05	0.2	0.15	509.65
ENSMUSG00000031229	chrX:105929100:105929372:-@chrX:105911470:105911654:-@chrX:105899881:105899993:-	0.27	0.2	0.36	0.12	0.06	0.22	0.27	0.2	0.36	0.08	0.03	0.15	0.15	3.35	0.19	490.12
ENSMUSG00000052752	chr17:24518742:24518799:-@chr17:24516505:24516599:-@chr17:24514713:24514829:-	0.95	0.9	0.99	0.76	0.66	0.87	0.95	0.9	0.99	0.87	0.76	0.96	0.19	298.63	0.08	0.37
ENSMUSG00000021302	chr13:14063206:14063401:-@chr13:14059319:14059450:-@chr13:14057796:14057888:-	0.08	0.05	0.12	0.26	0.18	0.35	0.08	0.05	0.12	0.18	0.12	0.26	-0.18	279.05	-0.1	3.03
ENSMUSG00000034681	chr17:24414675:24414734:+@chr17:24418038:24418218:+@chr17:24418457:24418612:+	0.37	0.34	0.4	0.45	0.41	0.49	0.37	0.34	0.4	0.47	0.42	0.51	-0.08	8.36	-0.1	267.61
ENSMUSG00000021000	chr12:59137698:59137786:+@chr12:59144699:59144770:+@chr12:59146847:59146957:+	0.77	0.7	0.84	0.76	0.63	0.88	0.77	0.7	0.84	0.52	0.41	0.63	0.01	0.2	0.25	262.23
ENSMUSG00000066036	chr4:139435010:139435184:+@chr4:139435949:139436032:+@chr4:139436122:139436259:+	0.09	0.06	0.13	0.24	0.16	0.33	0.09	0.06	0.13	0.27	0.19	0.36	-0.15	23.21	-0.18	238.99
ENSMUSG00000027201	chr2:125097977:125098075:-@chr2:125097563:125097634:-@chr2:125095912:125096120:-	0.79	0.74	0.83	0.65	0.58	0.73	0.79	0.74	0.83	0.6	0.52	0.68	0.14	6.27	0.19	247.57
NA	chr17:80202691:80202744:-@chr17:80202169:80202204:-@chr17:80200080:80201602:-	0.88	0.87	0.9	0.94	0.92	0.95	0.88	0.87	0.9	0.93	0.9	0.94	-0.06	237.84	-0.05	2.04
ENSMUSG00000043962	chr4:126202570:126202710:-@chr4:126194317:126194404:-@chr4:126186435:126186588:-	0.45	0.4	0.5	0.51	0.44	0.58	0.45	0.4	0.5	0.6	0.53	0.66	-0.06	0.25	-0.15	225.16
ENSMUSG00000030605	chr7:79145247:79145378:-@chr7:79143278:79143388:-@chr7:79142869:79143050:-	0.28	0.24	0.33	0.16	0.12	0.2	0.28	0.24	0.33	0.16	0.11	0.2	0.12	36.55	0.12	177.33
ENSMUSG00000015120	chr17:25273321:25273914:-@chr17:25272538:25272765:-@chr17:25269403:25269479:-	0.17	0.14	0.21	0.09	0.06	0.12	0.17	0.14	0.21	0.09	0.06	0.12	0.08	27.61	0.08	151.94
ENSMUSG00000002845	chr16:38585176:38585518:+@chr16:38585619:38585680:+@chr16:38586221:38586408:+	0.05	0.03	0.07	0.15	0.1	0.21	0.05	0.03	0.07	0.14	0.1	0.2	-0.1	91.87	-0.09	57.48
ENSMUSG00000025332	chrX:152270352:152270531:+@chrX:152270694:152270831:+@chrX:152271012:152271593:+	0.8	0.73	0.85	0.87	0.77	0.94	0.8	0.73	0.85	0.96	0.87	1	-0.07	0.35	-0.16	145.29
ENSMUSG00000052337	chr6:71852763:71852867:+@chr6:71853173:71853268:+@chr6:71856912:71857048:+	0.73	0.68	0.78	0.55	0.48	0.63	0.73	0.68	0.78	0.56	0.49	0.64	0.18	57.06	0.17	61.9
ENSMUSG00000029782	chr6:30508454:30508512:-@chr6:30506786:30506917:-@chr6:30505733:30505974:-	0.97	0.93	0.99	0.86	0.77	0.94	0.97	0.93	0.99	0.82	0.71	0.9	0.11	1.76	0.15	114.83
ENSMUSG00000014767	chr17:15499888:15500024:+@chr17:15501154:15501357:+@chr17:15502965:15503128:+	0.11	0.08	0.15	0.23	0.15	0.33	0.11	0.08	0.15	0.26	0.18	0.36	-0.12	2.37	-0.15	92.24
ENSMUSG00000022858	chr16:22265741:22265929:-@chr16:22258986:22259261:-@chr16:22254984:22255117:-	0.13	0.12	0.15	0.17	0.15	0.2	0.13	0.12	0.15	0.2	0.17	0.24	-0.04	1.74	-0.07	92.22
NA	chr19:6374719:6374898:+@chr19:6375658:6375862:+@chr19:6376296:6378038:+	0.27	0.23	0.31	0.17	0.14	0.22	0.27	0.23	0.31	0.16	0.12	0.2	0.1	4.86	0.11	82.09
ENSMUSG00000021000	chr12:59144699:59144770:+@chr12:59146336:59146362:+@chr12:59146847:59146957:+	0.11	0.08	0.16	0.17	0.1	0.27	0.11	0.08	0.16	0.32	0.21	0.44	-0.06	0.2	-0.21	78.12
ENSMUSG00000039988	chr3:157972232:157972317:+@chr3:157973000:157973045:+@chr3:157975228:157975294:+	0.97	0.93	1	0.75	0.61	0.87	0.97	0.93	1	0.91	0.8	0.98	0.22	67.5	0.06	0.21
ENSMUSG00000037443	chr4:134167289:134167441:-@chr4:134164628:134164757:-@chr4:134155677:134156371:-	0.11	0.07	0.16	0.32	0.21	0.44	0.11	0.07	0.16	0.19	0.1	0.31	-0.21	65.86	-0.08	0.35
ENSMUSG00000026074	chr1:40010557:40010677:+@chr1:40011650:40011841:+@chr1:40014106:40014223:+	0.53	0.47	0.58	0.37	0.31	0.44	0.53	0.47	0.58	0.46	0.4	0.53	0.16	64.92	0.07	0.3
ENSMUSG00000087166	chr4:98726754:98726840:+@chr4:98727395:98727470:+@chr4:98733143:98734078:+	0.8	0.74	0.86	0.72	0.63	0.81	0.8	0.74	0.86	0.59	0.49	0.71	0.08	0.3	0.21	63.81
ENSMUSG00000042632	chr15:79305703:79305811:-@chr15:79304305:79304469:-@chr15:79302619:79302697:-	0.31	0.22	0.4	0.12	0.06	0.2	0.31	0.22	0.4	0.11	0.04	0.2	0.19	48.05	0.2	9.69
ENSMUSG00000032407	chr9:95502540:95502584:-@chr9:95500688:95500819:-@chr9:95495835:95495933:-	0.64	0.58	0.69	0.78	0.7	0.85	0.64	0.58	0.69	0.8	0.73	0.86	-0.14	7.9	-0.16	47.3
ENSMUSG00000022789	chr16:16345998:16346145:-@chr16:16341422:16341468:-@chr16:16340996:16341067:-	0.93	0.89	0.97	0.77	0.66	0.86	0.93	0.89	0.97	0.77	0.68	0.85	0.16	10.61	0.16	41.06
ENSMUSG00000034617	chr13:68577588:68577705:-@chr13:68575018:68575390:-@chr13:68572578:68572700:-	0.77	0.68	0.85	0.97	0.89	1	0.77	0.68	0.85	0.84	0.71	0.97	-0.2	50.77	-0.07	0.32
ENSMUSG00000051343	chr6:85347780:85348455:-@chr6:85340343:85342361:-@chr6:85337481:85337670:-	0.56	0.5	0.64	0.39	0.33	0.46	0.56	0.5	0.64	0.45	0.38	0.53	0.17	48.3	0.11	1.39
ENSMUSG00000047613	chr4:153957237:153957322:+@chr4:153959749:153959862:+@chr4:153960531:153960992:+	0.94	0.9	0.97	0.83	0.74	0.91	0.94	0.9	0.97	0.77	0.69	0.85	0.11	1.68	0.17	45.67
NA	chr11:4704157:4704344:-@chr11:4703904:4703989:-@chr11:4701968:4702220:-	0.06	0.05	0.08	0.11	0.09	0.13	0.06	0.05	0.08	0.12	0.1	0.14	-0.05	20.35	-0.06	26.5
ENSMUSG00000066043	chr4:132386892:132387065:-@chr4:132383282:132383362:-@chr4:132378405:132378563:-	0.36	0.26	0.47	0.37	0.21	0.57	0.36	0.26	0.47	0.7	0.54	0.83	-0.01	0.29	-0.34	42.74
ENSMUSG00000030852	chr7:130601837:130601937:+@chr7:130621721:130626841:+@chr7:130663016:130663141:+	0.35	0.25	0.48	0.24	0.1	0.58	0.35	0.25	0.48	0.12	0.07	0.2	0.11	0.69	0.23	42.31
ENSMUSG00000001039	chr11:61506344:61506412:+@chr11:61507628:61507739:+@chr11:61509072:61509168:+	0.98	0.95	1	0.86	0.75	0.96	0.98	0.95	1	0.81	0.67	0.91	0.12	1.43	0.17	40.01
ENSMUSG00000062170	chrX:68761839:68762231:+@chrX:68763932:68764009:+@chrX:68772045:68772141:+	0.49	0.41	0.57	0.67	0.58	0.77	0.49	0.41	0.57	0.7	0.6	0.79	-0.18	19.55	-0.21	19.12
NA	chr1:162676691:162676817:-@chr1:162675605:162675841:-@chr1:162671785:162673656:-	0.21	0.18	0.24	0.14	0.11	0.19	0.21	0.18	0.24	0.12	0.08	0.16	0.07	1.23	0.09	35.27
ENSMUSG00000056952	chr6:113707266:113707393:+@chr6:113709460:113709643:+@chr6:113710041:113710214:+	0.89	0.82	0.94	0.69	0.58	0.8	0.89	0.82	0.94	0.87	0.77	0.95	0.2	34.35	0.02	0.16
ENSMUSG00000034120	chr11:116852021:116852331:-@chr11:116851648:116851751:-@chr11:116850856:116850961:-	0.04	0.03	0.05	0.08	0.06	0.1	0.04	0.03	0.05	0.07	0.06	0.09	-0.04	18.92	-0.03	15.25
NA	chr2:105980982:105981120:-@chr2:105970448:105970516:-@chr2:105966708:105967094:-	0.95	0.89	0.99	0.95	0.83	1	0.95	0.89	0.99	0.72	0.54	0.86	0	0.15	0.23	32.76
ENSMUSG00000022119	chr14:105140316:105140447:-@chr14:105139091:105139162:-@chr14:105131882:105132007:-	0.31	0.24	0.39	0.16	0.09	0.24	0.31	0.24	0.39	0.13	0.07	0.22	0.15	5.7	0.18	25.51
ENSMUSG00000015165	chr7:28815280:28815352:+@chr7:28817335:28817404:+@chr7:28818461:28818532:+	0.03	0.02	0.03	0.07	0.04	0.09	0.03	0.02	0.03	0.07	0.05	0.1	-0.04	10.02	-0.04	21.17
ENSMUSG00000025137	chr11:120613379:120613423:-@chr11:120612846:120613083:-@chr11:120612463:120612601:-	0.16	0.1	0.25	0.05	0.02	0.11	0.16	0.1	0.25	0.02	0	0.06	0.11	2.57	0.14	28.45
ENSMUSG00000026708	chr1:161078229:161078480:+@chr1:161079868:161080010:+@chr1:161082908:161083450:+	0.07	0.03	0.12	0.17	0.09	0.28	0.07	0.03	0.12	0.29	0.15	0.45	-0.1	0.98	-0.22	29.93
ENSMUSG00000010453	chr1:36348525:36348681:-@chr1:36347217:36347294:-@chr1:36345838:36346029:-	0.07	0.03	0.12	0.14	0.06	0.25	0.07	0.03	0.12	0.27	0.16	0.4	-0.07	0.31	-0.2	30.21
ENSMUSG00000026669	chr2:5012705:5012791:-@chr2:5010689:5010775:-@chr2:5008480:5008812:-	0.94	0.86	1	0.69	0.54	0.84	0.94	0.86	1	0.86	0.72	0.97	0.25	29.98	0.08	0.3
ENSMUSG00000021693	chr13:106990038:106990092:-@chr13:106987953:106988075:-@chr13:106987269:106987369:-	0.87	0.77	0.96	0.56	0.42	0.73	0.87	0.77	0.96	0.85	0.62	0.98	0.31	29.97	0.02	0.27
ENSMUSG00000033499	chr13:9158123:9158229:+@chr13:9158551:9158802:+@chr13:9164675:9164720:+	0.63	0.52	0.73	0.65	0.52	0.78	0.63	0.52	0.73	0.87	0.74	0.96	-0.02	0.24	-0.24	27.86
ENSMUSG00000029439	chr5:129554443:129554708:+@chr5:129559469:129559621:+@chr5:129560680:129560805:+	0.2	0.15	0.27	0.06	0.02	0.13	0.2	0.15	0.27	0.06	0.02	0.13	0.14	8.02	0.14	20.02
ENSMUSG00000061950	chr17:65829375:65829547:+@chr17:65829871:65829990:+@chr17:65830997:65831092:+	0.03	0.01	0.05	0.03	0.01	0.07	0.03	0.01	0.05	0.16	0.08	0.28	0	0.04	-0.13	27.48
ENSMUSG00000045962	chr6:119956071:119956196:-@chr6:119953771:119954232:-@chr6:119952685:119952969:-	0.31	0.27	0.36	0.16	0.1	0.24	0.31	0.27	0.36	0.2	0.14	0.27	0.15	24.25	0.11	3
ENSMUSG00000025968	chr1:63176586:63176822:-@chr1:63172154:63172257:-@chr1:63170849:63170914:-	0.27	0.21	0.33	0.43	0.35	0.51	0.27	0.21	0.33	0.45	0.36	0.55	-0.16	9.76	-0.18	17.27
ENSMUSG00000023286	chr4:155943831:155944013:+@chr4:155946255:155946417:+@chr4:155949007:155949137:+	0.68	0.62	0.73	0.78	0.71	0.86	0.68	0.62	0.73	0.84	0.77	0.9	-0.1	1.23	-0.16	24.78
ENSMUSG00000006169	chr11:45895060:45895129:+@chr11:45902211:45902285:+@chr11:45906181:45906467:+	0.77	0.67	0.86	0.82	0.72	0.92	0.77	0.67	0.86	0.97	0.89	1	-0.05	0.21	-0.2	25.56
ENSMUSG00000038902	chr3:94853950:94854074:+@chr3:94856043:94856201:+@chr3:94860796:94860971:+	0.91	0.83	0.96	0.7	0.57	0.82	0.91	0.83	0.96	0.74	0.64	0.84	0.21	20.02	0.17	5.55
ENSMUSG00000018604	chr5:119674026:119674293:+@chr5:119675243:119675302:+@chr5:119675558:119675704:+	0.13	0.08	0.2	0.25	0.15	0.38	0.13	0.08	0.2	0.38	0.23	0.58	-0.12	0.82	-0.25	24.53
ENSMUSG00000024246	chr17:81032632:81032740:-@chr17:81030624:81031014:-@chr17:81026327:81026970:-	0.13	0.07	0.21	0.02	0	0.05	0.13	0.07	0.21	0.06	0.01	0.15	0.11	24.44	0.07	0.56
ENSMUSG00000047534	chr12:65172449:65172580:-@chr12:65161403:65162028:-@chr12:65158395:65158861:-	0.67	0.61	0.73	0.51	0.44	0.6	0.67	0.61	0.73	0.55	0.47	0.64	0.16	22.63	0.12	1.41
ENSMUSG00000019843	chr10:39526781:39526930:+@chr10:39529919:39530074:+@chr10:39532016:39532195:+	0.47	0.33	0.68	0.19	0.1	0.31	0.47	0.33	0.68	0.37	0.22	0.56	0.28	23.34	0.1	0.44
ENSMUSG00000034101	chr2:84612936:84613089:-@chr2:84612532:84612549:-@chr2:84612024:84612092:-	0.53	0.47	0.6	0.56	0.47	0.66	0.53	0.47	0.6	0.71	0.63	0.79	-0.03	0.17	-0.18	23.37
ENSMUSG00000046516,ENSMUSG00000095464	chr16:38349241:38349329:+@chr16:38349677:38349731:+@chr16:38352626:38352763:+	0.02	0.01	0.03	0.03	0.01	0.06	0.02	0.01	0.03	0.09	0.05	0.14	-0.01	0.06	-0.07	22.16
ENSMUSG00000006498	chr10:79859781:79859955:+@chr10:79860117:79860194:+@chr10:79860824:79860969:+	0.6	0.57	0.64	0.49	0.43	0.55	0.6	0.57	0.64	0.49	0.43	0.55	0.11	11.78	0.11	10.32
ENSMUSG00000030352	chr6:128083382:128083481:-@chr6:128078027:128078126:-@chr6:128034166:128034245:-	0.1	0.04	0.17	0.27	0.18	0.38	0.1	0.04	0.17	0.28	0.18	0.41	-0.17	14.3	-0.18	7.59
ENSMUSG00000059436	chr12:76961990:76962248:-@chr12:76961263:76961289:-@chr12:76953169:76953276:-	0.27	0.19	0.35	0.35	0.24	0.46	0.27	0.19	0.35	0.53	0.4	0.65	-0.08	0.29	-0.26	20.1
ENSMUSG00000029030	chr4:154160085:154160261:-@chr4:154159269:154159422:-@chr4:154157485:154158565:-	0.91	0.83	0.97	0.9	0.81	0.97	0.91	0.83	0.97	0.71	0.6	0.81	0.01	0.15	0.2	19.22
ENSMUSG00000040225	chr1:162676691:162676817:-@chr1:162675605:162675841:-@chr1:162674099:162674151:-	0.35	0.29	0.41	0.24	0.17	0.32	0.35	0.29	0.41	0.19	0.13	0.26	0.11	1.17	0.16	17.88
ENSMUSG00000023186	chr9:38718268:38718387:+@chr9:38719258:38719333:+@chr9:38722373:38722430:+	0.77	0.66	0.86	0.89	0.75	0.99	0.77	0.66	0.86	0.96	0.89	0.99	-0.12	0.84	-0.19	18.04
ENSMUSG00000029657	chr5:149624969:149625177:-@chr5:149623465:149623596:-@chr5:149620546:149620683:-	1	0.99	1	0.96	0.94	0.98	1	0.99	1	0.98	0.96	0.99	0.04	18.03	0.02	0.08
ENSMUSG00000023942	chr17:45595482:45595572:-@chr17:45593332:45593432:-@chr17:45592179:45592261:-	0.65	0.6	0.7	0.57	0.5	0.65	0.65	0.6	0.7	0.5	0.42	0.58	0.08	0.46	0.15	17.37
ENSMUSG00000063889	chr18:3325361:3325478:-@chr18:3299162:3299308:-@chr18:3295322:3295416:-	0.56	0.37	0.81	0.18	0.06	0.36	0.56	0.37	0.81	0.59	0.3	0.87	0.38	17.05	-0.03	0.48
ENSMUSG00000020674	chr12:29975491:29975562:+@chr12:29979240:29979311:+@chr12:29982294:29982365:+	0.74	0.62	0.86	0.76	0.63	0.87	0.74	0.62	0.86	0.95	0.87	0.99	-0.02	0.23	-0.21	16.92
ENSMUSG00000024795	chr19:34969920:34970117:+@chr19:34972397:34972498:+@chr19:34972859:34973009:+	0.76	0.68	0.83	0.75	0.65	0.85	0.76	0.68	0.83	0.92	0.85	0.96	0.01	0.16	-0.16	16.01
ENSMUSG00000046897	chr15:102208236:102208361:+@chr15:102208753:102208876:+@chr15:102209155:102209273:+	0.69	0.62	0.77	0.79	0.69	0.9	0.69	0.62	0.77	0.89	0.8	0.96	-0.1	0.49	-0.2	15.46
ENSMUSG00000037608	chr10:20333392:20333572:+@chr10:20334499:20334645:+@chr10:20339709:20339921:+	0.46	0.43	0.49	0.57	0.52	0.63	0.46	0.43	0.49	0.56	0.5	0.62	-0.11	12.06	-0.1	3.61
ENSMUSG00000023902	chr17:23605505:23605964:+@chr17:23607124:23607388:+@chr17:23607580:23607644:+	0.94	0.91	0.97	0.84	0.73	0.92	0.94	0.91	0.97	0.78	0.67	0.88	0.1	1.26	0.16	14.08
ENSMUSG00000022892	chr16:85043576:85043743:-@chr16:85040251:85040307:-@chr16:85030232:85030365:-	0.79	0.71	0.85	0.62	0.55	0.7	0.79	0.71	0.85	0.76	0.69	0.83	0.17	14.93	0.03	0.14
ENSMUSG00000031310	chrX:101416909:101416981:-@chrX:101416167:101416461:-@chrX:101415761:101415938:-	0.84	0.73	0.93	0.55	0.4	0.72	0.84	0.73	0.93	0.76	0.61	0.89	0.29	14.69	0.08	0.34
ENSMUSG00000030316	chr6:115025274:115025424:-@chr6:115016083:115016228:-@chr6:115012158:115012319:-	0.97	0.89	1	0.91	0.77	0.99	0.97	0.89	1	0.72	0.54	0.89	0.06	0.19	0.25	14.68
ENSMUSG00000009741	chr9:113958829:113958939:+@chr9:113959376:113959483:+@chr9:113964552:113964655:+	0.39	0.34	0.45	0.54	0.44	0.65	0.39	0.34	0.45	0.59	0.49	0.7	-0.15	2.32	-0.2	12.49
ENSMUSG00000069495	chr2:49530011:49530143:+@chr2:49532044:49532235:+@chr2:49535255:49535344:+	0.65	0.56	0.74	0.77	0.63	0.88	0.65	0.56	0.74	0.87	0.76	0.96	-0.12	0.59	-0.22	13.67
ENSMUSG00000047407	chr17:70850872:70851210:-@chr17:70849647:70849804:-@chr17:70846172:70846398:-	0.03	0.02	0.05	0.05	0.02	0.08	0.03	0.02	0.05	0.11	0.07	0.16	-0.02	0.06	-0.08	14.06
ENSMUSG00000041926	chr1:135277389:135277537:-@chr1:135272362:135272478:-@chr1:135271529:135271764:-	0.76	0.68	0.84	0.92	0.84	0.97	0.76	0.68	0.84	0.76	0.66	0.86	-0.16	13.92	0	0.19
ENSMUSG00000026958	chr2:25354233:25354293:-@chr2:25353608:25353726:-@chr2:25353360:25353516:-	0.45	0.33	0.57	0.49	0.37	0.63	0.45	0.33	0.57	0.74	0.58	0.89	-0.04	0.25	-0.29	13.46
ENSMUSG00000039826	chr2:29779823:29779895:-@chr2:29778732:29778868:-@chr2:29776111:29777956:-	0.87	0.75	0.97	0.71	0.59	0.84	0.87	0.75	0.97	0.57	0.43	0.72	0.16	1.17	0.3	12.51
ENSMUSG00000040928	chr4:129189372:129189482:-@chr4:129183601:129183717:-@chr4:129181742:129182532:-	0.57	0.43	0.74	0.89	0.71	0.98	0.57	0.43	0.74	0.62	0.45	0.81	-0.32	13.17	-0.05	0.32
ENSMUSG00000003824	chr8:84872720:84872832:+@chr8:84883431:84883584:+@chr8:84885935:84886123:+	0.67	0.62	0.72	0.57	0.49	0.65	0.67	0.62	0.72	0.52	0.44	0.6	0.1	0.73	0.15	12.71
ENSMUSG00000026034	chr1:58417267:58417383:-@chr1:58417013:58417179:-@chr1:58414590:58414684:-	0.56	0.5	0.62	0.64	0.57	0.7	0.56	0.5	0.62	0.73	0.65	0.81	-0.08	0.45	-0.17	12.68
ENSMUSG00000090841	chr10:128492059:128492136:-@chr10:128491720:128491764:-@chr10:128490861:128491033:-	0.06	0.05	0.07	0.07	0.06	0.09	0.06	0.05	0.07	0.09	0.08	0.11	-0.01	0.07	-0.03	12.79
ENSMUSG00000063511	chr7:45383804:45383885:-@chr7:45381825:45383184:-@chr7:45380717:45380818:-	0.11	0.11	0.12	0.09	0.08	0.1	0.11	0.11	0.12	0.09	0.08	0.1	0.02	5.85	0.02	6.65
ENSMUSG00000043411	chr4:137634898:137635008:+@chr4:137636934:137636987:+@chr4:137637760:137637890:+	0.37	0.31	0.42	0.5	0.42	0.57	0.37	0.31	0.42	0.53	0.45	0.61	-0.13	3.91	-0.16	8.51
ENSMUSG00000032519	chr9:120117453:120117537:+@chr9:120119883:120120005:+@chr9:120120257:120120436:+	0.16	0.09	0.26	0.05	0.01	0.11	0.16	0.09	0.26	0.03	0	0.08	0.11	1.2	0.13	11.22
ENSMUSG00000069135	chr17:8172928:8173008:+@chr17:8175519:8175578:+@chr17:8182228:8182454:+	0.12	0.06	0.18	0.32	0.2	0.46	0.12	0.06	0.18	0.25	0.14	0.38	-0.2	11.27	-0.13	0.87
ENSMUSG00000029823	chr6:38593378:38593469:+@chr6:38598785:38598814:+@chr6:38603277:38603468:+	0.64	0.57	0.7	0.53	0.45	0.62	0.64	0.57	0.7	0.46	0.37	0.55	0.11	0.81	0.18	10.93
NA	chr5:121811385:121811612:+@chr5:121813385:121813553:+@chr5:121814338:121814950:+	0.51	0.42	0.6	0.29	0.19	0.41	0.51	0.42	0.6	0.36	0.25	0.49	0.22	10.26	0.15	1.29
ENSMUSG00000040928	chr4:129189542:129189626:-@chr4:129183601:129183717:-@chr4:129181742:129182532:-	0.54	0.41	0.67	0.82	0.69	0.93	0.54	0.41	0.67	0.63	0.47	0.83	-0.28	11.11	-0.09	0.41
ENSMUSG00000023942	chr17:45595482:45595572:-@chr17:45593332:45593563:-@chr17:45590257:45590338:-	0.4	0.3	0.5	0.33	0.22	0.48	0.4	0.3	0.5	0.2	0.13	0.3	0.07	0.3	0.2	11.19
ENSMUSG00000013787	chr17:34905342:34905456:+@chr17:34905610:34905711:+@chr17:34905910:34906058:+	0.59	0.51	0.68	0.45	0.34	0.58	0.59	0.51	0.68	0.38	0.28	0.49	0.14	0.9	0.21	10.57
ENSMUSG00000018340	chr11:54991391:54991444:-@chr11:54987051:54987068:-@chr11:54986122:54986215:-	0.64	0.57	0.71	0.8	0.71	0.87	0.64	0.57	0.71	0.72	0.63	0.8	-0.16	10.92	-0.08	0.37
ENSMUSG00000027620	chr2:156176403:156176457:-@chr2:156174097:156174168:-@chr2:156172828:156173022:-	0.12	0.09	0.15	0.04	0.01	0.07	0.12	0.09	0.15	0.07	0.04	0.11	0.08	10.9	0.05	0.32
ENSMUSG00000017686	chr11:80254660:80254862:+@chr11:80255862:80255957:+@chr11:80265742:80267907:+	0.14	0.09	0.19	0.29	0.2	0.4	0.14	0.09	0.19	0.31	0.21	0.42	-0.15	4.65	-0.17	6.56
ENSMUSG00000020166	chr10:116549033:116549175:-@chr10:116527827:116527949:-@chr10:116517317:116517383:-	0.84	0.77	0.9	0.75	0.64	0.85	0.84	0.77	0.9	0.66	0.55	0.77	0.09	0.46	0.18	10.65
ENSMUSG00000052854	chrX:138995881:138995981:+@chrX:138997442:138997584:+@chrX:138997820:138997969:+	0.28	0.16	0.44	0.11	0.06	0.18	0.28	0.16	0.44	0.08	0.04	0.14	0.17	2.07	0.2	8.89
ENSMUSG00000005312	chr13:58183182:58183324:-@chr13:58180822:58180905:-@chr13:58179553:58179668:-	0.74	0.69	0.79	0.63	0.55	0.7	0.74	0.69	0.79	0.6	0.53	0.67	0.11	1.71	0.14	8.73
NA	chr19:4811172:4811634:-@chr19:4801551:4801805:-@chr19:4793672:4794009:-	0.95	0.91	0.97	0.95	0.88	0.99	0.95	0.91	0.97	0.78	0.67	0.89	0	0.1	0.17	10.14
ENSMUSG00000038695	chr7:44467980:44468190:+@chr7:44468306:44468417:+@chr7:44468807:44468969:+	0.13	0.05	0.24	0.13	0.05	0.27	0.13	0.05	0.24	0.42	0.23	0.63	0	0.18	-0.29	10
ENSMUSG00000071650	chr19:8907215:8907394:+@chr19:8907851:8907916:+@chr19:8908678:8908747:+	0.43	0.38	0.48	0.35	0.29	0.41	0.43	0.38	0.48	0.3	0.24	0.37	0.08	0.61	0.13	9.46
ENSMUSG00000022246	chr15:10591587:10591615:-@chr15:10589259:10589345:-@chr15:10587838:10587924:-	0.49	0.4	0.59	0.3	0.22	0.4	0.49	0.4	0.59	0.31	0.21	0.42	0.19	6.87	0.18	2.73
ENSMUSG00000062270	chr9:90107235:90107302:-@chr9:90103655:90103771:-@chr9:90102300:90102386:-	0.04	0.03	0.05	0.05	0.04	0.06	0.04	0.03	0.05	0.06	0.05	0.08	-0.01	0.07	-0.02	9.46
ENSMUSG00000046897	chr15:102204571:102204883:+@chr15:102205229:102205305:+@chr15:102207771:102207920:+	0.11	0.07	0.17	0.19	0.1	0.33	0.11	0.07	0.17	0.28	0.18	0.42	-0.08	0.32	-0.17	9.09
ENSMUSG00000042323	chr14:31107109:31107310:+@chr14:31110415:31110579:+@chr14:31117013:31117083:+	0.28	0.2	0.38	0.18	0.09	0.3	0.28	0.2	0.38	0.1	0.05	0.18	0.1	0.6	0.18	8.71
ENSMUSG00000040268	chr7:130902177:130902245:+@chr7:130904319:130904557:+@chr7:130904870:130904934:+	0.03	0.02	0.04	0.02	0.01	0.03	0.03	0.02	0.04	0	0	0.01	0.01	0.05	0.03	9.21
ENSMUSG00000061186	chr2:10380185:10380235:+@chr2:10381023:10381066:+@chr2:10393265:10393406:+	0.35	0.16	0.57	0.35	0.15	0.59	0.35	0.16	0.57	0.74	0.49	0.92	0	0.45	-0.39	8.75
ENSMUSG00000021996	chr14:74742014:74742138:+@chr14:74743219:74743338:+@chr14:74745550:74745717:+	0.92	0.88	0.95	0.97	0.93	0.99	0.92	0.88	0.95	0.98	0.95	1	-0.05	0.49	-0.06	8.47
ENSMUSG00000026074	chr1:40000624:40000749:+@chr1:40001430:40001591:+@chr1:40004807:40004913:+	0.31	0.23	0.4	0.17	0.1	0.25	0.31	0.23	0.4	0.15	0.09	0.23	0.14	2.26	0.16	6.67
ENSMUSG00000034343	chr1:91250319:91250437:+@chr1:91253760:91253827:+@chr1:91254260:91254393:+	0.03	0	0.07	0.14	0.07	0.24	0.03	0	0.07	0.16	0.08	0.26	-0.11	2.65	-0.13	6.27
ENSMUSG00000021262	chr12:108683195:108683261:+@chr12:108683348:108683410:+@chr12:108686050:108686116:+	0.93	0.86	0.98	0.72	0.58	0.84	0.93	0.86	0.98	0.95	0.85	1	0.21	8.67	-0.02	0.16
ENSMUSG00000021952,ENSMUSG00000021959	chr14:57648419:57648524:-@chr14:57643335:57643489:-@chr14:57643082:57643223:-	0.19	0.13	0.25	0.31	0.18	0.47	0.19	0.13	0.25	0.46	0.28	0.68	-0.12	0.67	-0.27	8.12
ENSMUSG00000052752	chr17:24518742:24518799:-@chr17:24516505:24516596:-@chr17:24514713:24514829:-	0.96	0.91	0.99	0.81	0.71	0.89	0.96	0.91	0.99	0.87	0.77	0.96	0.15	8.24	0.09	0.43
ENSMUSG00000020946	chr11:103697630:103697710:-@chr11:103689255:103689319:-@chr11:103687525:103687633:-	0.88	0.82	0.93	0.94	0.9	0.98	0.88	0.82	0.93	0.98	0.93	1	-0.06	0.54	-0.1	7.97
ENSMUSG00000030822	chr7:127470985:127471119:+@chr7:127471705:127471977:+@chr7:127472098:127472266:+	0.68	0.54	0.81	0.38	0.25	0.53	0.68	0.54	0.81	0.62	0.42	0.84	0.3	8.03	0.06	0.37
ENSMUSG00000060073	chr12:70974623:70974767:+@chr12:70978733:70978839:+@chr12:70983319:70983442:+	0.95	0.89	0.99	0.8	0.7	0.9	0.95	0.89	0.99	0.75	0.66	0.87	0.15	4	0.2	4.14
ENSMUSG00000041890	chr5:114745429:114745571:-@chr5:114743731:114743880:-@chr5:114739033:114739281:-	0.73	0.58	0.87	0.45	0.29	0.63	0.73	0.58	0.87	0.72	0.54	0.88	0.28	7.72	0.01	0.28
ENSMUSG00000040594	chr11:33441803:33441938:-@chr11:33404082:33404199:-@chr11:33329471:33329544:-	0.12	0.07	0.19	0.2	0.09	0.36	0.12	0.07	0.19	0.37	0.21	0.58	-0.08	0.3	-0.25	7.61
ENSMUSG00000044791	chr9:110573612:110574274:+@chr9:110577122:110577289:+@chr9:110590388:110590436:+	0.07	0.04	0.1	0.01	0	0.03	0.07	0.04	0.1	0.04	0.02	0.08	0.06	7.79	0.03	0.12
ENSMUSG00000060450	chr18:38300429:38300590:+@chr18:38301656:38301807:+@chr18:38307865:38308395:+	0.7	0.62	0.77	0.51	0.41	0.62	0.7	0.62	0.77	0.56	0.46	0.67	0.19	6.74	0.14	1.16
ENSMUSG00000027620	chr2:156179177:156179240:-@chr2:156178880:156178952:-@chr2:156177336:156177385:-	0.09	0.07	0.12	0.13	0.09	0.17	0.09	0.07	0.12	0.18	0.13	0.23	-0.04	0.19	-0.09	7.67
ENSMUSG00000031229	chrX:105928959:105929370:-@chrX:105911470:105911654:-@chrX:105899881:105899993:-	0.26	0.19	0.34	0.14	0.06	0.24	0.26	0.19	0.34	0.09	0.03	0.19	0.12	1.13	0.17	6.69
ENSMUSG00000022568	chr15:76048115:76048152:-@chr15:76047922:76047996:-@chr15:76047621:76047672:-	0.02	0	0.05	0.2	0.07	0.38	0.02	0	0.05	0.06	0.02	0.15	-0.18	7.49	-0.04	0.14
ENSMUSG00000032612	chr9:108362837:108362898:+@chr9:108365830:108365970:+@chr9:108366761:108366878:+	0.96	0.89	0.99	0.8	0.68	0.91	0.96	0.89	0.99	0.94	0.84	0.99	0.16	7.45	0.02	0.12
NA	chr11:120713693:120713767:-@chr11:120712440:120712712:-@chr11:120711844:120711895:-	0.06	0.04	0.09	0.04	0.02	0.06	0.06	0.04	0.09	0.01	0.01	0.03	0.02	0.13	0.05	7.4
ENSMUSG00000074129	chr7:45126991:45127092:-@chr7:45126709:45126794:-@chr7:45126478:45126537:-	0.97	0.97	0.98	0.99	0.98	0.99	0.97	0.97	0.98	0.98	0.98	0.99	-0.02	7.32	-0.01	0.18
ENSMUSG00000035597	chr12:65043232:65043357:+@chr12:65043715:65043877:+@chr12:65044006:65044124:+	0.18	0.12	0.23	0.07	0.04	0.12	0.18	0.12	0.23	0.11	0.06	0.18	0.11	7.07	0.07	0.35
ENSMUSG00000039361	chr7:90177500:90177603:+@chr7:90182219:90182368:+@chr7:90189150:90189257:+	0.57	0.52	0.61	0.46	0.41	0.51	0.57	0.52	0.61	0.52	0.47	0.57	0.11	6.54	0.05	0.24
ENSMUSG00000008140	chr7:44491955:44492048:-@chr7:44491163:44491249:-@chr7:44489938:44490970:-	0.19	0.15	0.24	0.15	0.1	0.21	0.19	0.15	0.24	0.09	0.05	0.15	0.04	0.2	0.1	6.33
NA	chr1:162675605:162675841:-@chr1:162674099:162674151:-@chr1:162671785:162673656:-	0.15	0.1	0.21	0.28	0.19	0.4	0.15	0.1	0.21	0.3	0.2	0.41	-0.13	2.61	-0.15	3.91
ENSMUSG00000041921	chr2:71453338:71453398:+@chr2:71500779:71500869:+@chr2:71506785:71506942:+	0.05	0.01	0.11	0.31	0.13	0.55	0.05	0.01	0.11	0.16	0.05	0.34	-0.26	6.11	-0.11	0.39
ENSMUSG00000039678	chr2:30134797:30134870:+@chr2:30135409:30135552:+@chr2:30136673:30136713:+	0.4	0.29	0.53	0.71	0.52	0.88	0.4	0.29	0.53	0.37	0.23	0.55	-0.31	6.22	0.03	0.28
ENSMUSG00000078427	chr10:128821771:128821971:+@chr10:128824779:128824831:+@chr10:128833312:128833411:+	0.06	0.05	0.08	0.11	0.08	0.15	0.06	0.05	0.08	0.12	0.09	0.16	-0.05	1.28	-0.06	5.1
ENSMUSG00000026074	chr1:40007433:40007530:+@chr1:40008331:40008339:+@chr1:40009688:40009863:+	0.42	0.34	0.5	0.25	0.17	0.34	0.42	0.34	0.5	0.3	0.2	0.4	0.17	5.49	0.12	0.85
NA	chr13:61804312:61804405:+@chr13:61804611:61804716:+@chr13:61826309:61826524:+	0.13	0.07	0.22	0.19	0.09	0.31	0.13	0.07	0.22	0.42	0.23	0.72	-0.06	0.23	-0.29	6.1
ENSMUSG00000032217	chr9:70503459:70503725:-@chr9:70502940:70503002:-@chr9:70475776:70476668:-	0.53	0.37	0.68	0.53	0.35	0.7	0.53	0.37	0.68	0.84	0.63	0.98	0	0.32	-0.31	5.99
ENSMUSG00000062797	chr7:89940969:89941185:-@chr7:89935727:89935964:-@chr7:89923564:89923715:-	0.83	0.79	0.87	0.78	0.71	0.84	0.83	0.79	0.87	0.71	0.64	0.78	0.05	0.23	0.12	5.88
ENSMUSG00000025817	chr2:5845034:5845385:+@chr2:5848108:5848190:+@chr2:5854816:5854918:+	0.06	0.04	0.09	0.14	0.09	0.21	0.06	0.04	0.09	0.16	0.1	0.23	-0.08	1.32	-0.1	4.77
ENSMUSG00000059474	chr11:93887022:93887073:+@chr11:93891339:93891388:+@chr11:93905159:93905358:+	0.21	0.12	0.32	0.25	0.14	0.38	0.21	0.12	0.32	0.53	0.31	0.74	-0.04	0.25	-0.32	5.81
ENSMUSG00000021693	chr13:106990038:106990092:-@chr13:106988010:106988075:-@chr13:106987269:106987369:-	0.88	0.76	0.96	0.63	0.47	0.78	0.88	0.76	0.96	0.9	0.75	0.98	0.25	5.84	-0.02	0.22
ENSMUSG00000038685	chr2:181354353:181354442:+@chr2:181355009:181355125:+@chr2:181355310:181355552:+	0.66	0.5	0.81	0.37	0.23	0.56	0.66	0.5	0.81	0.66	0.4	0.93	0.29	5.61	0	0.44
ENSMUSG00000026790	chr2:29889720:29889921:+@chr2:29890766:29891002:+@chr2:29892186:29892276:+	0.04	0.03	0.06	0.02	0.01	0.04	0.04	0.03	0.06	0.01	0	0.03	0.02	0.26	0.03	5.74
ENSMUSG00000032624	chr17:83421606:83421735:+@chr17:83427223:83427351:+@chr17:83428000:83428025:+	0.95	0.86	0.99	0.72	0.57	0.87	0.95	0.86	0.99	0.82	0.68	0.94	0.23	5.12	0.13	0.88
ENSMUSG00000023010	chr15:99392947:99393040:+@chr15:99399657:99399871:+@chr15:99401580:99401663:+	0.03	0.02	0.04	0.01	0.01	0.02	0.03	0.02	0.04	0.02	0.01	0.03	0.02	5.99	0.01	0
NA	chr4:141139692:141139796:-@chr4:141120324:141120373:-@chr4:141118527:141118781:-	0.69	0.63	0.75	0.74	0.67	0.8	0.69	0.63	0.75	0.82	0.75	0.88	-0.05	0.23	-0.13	5.72
ENSMUSG00000020212	chr10:118146595:118146971:+@chr10:118147981:118148115:+@chr10:118150789:118150956:+	0.87	0.75	0.96	0.87	0.71	0.99	0.87	0.75	0.96	0.55	0.35	0.76	0	0.23	0.32	5.72
ENSMUSG00000022412	chr15:80234080:80234181:+@chr15:80234682:80234780:+@chr15:80235805:80236153:+	0.34	0.21	0.47	0.66	0.43	0.84	0.34	0.21	0.47	0.32	0.16	0.54	-0.32	5.64	0.02	0.31
ENSMUSG00000041199	chr17:25727751:25727847:+@chr17:25728203:25728391:+@chr17:25728523:25728646:+	0.81	0.6	0.94	0.83	0.62	0.96	0.81	0.6	0.94	0.51	0.35	0.73	-0.02	0.33	0.3	5.53
ENSMUSG00000020516	chr11:86517151:86517249:-@chr11:86516744:86516987:-@chr11:86516091:86516191:-	0.05	0.02	0.1	0.23	0.11	0.43	0.05	0.02	0.1	0.12	0.02	0.32	-0.18	5.59	-0.07	0.24
ENSMUSG00000056260	chr3:106721682:106722106:+@chr3:106731663:106733142:+@chr3:106734358:106734639:+	0.87	0.8	0.93	0.65	0.51	0.81	0.87	0.8	0.93	0.73	0.62	0.86	0.22	4.75	0.14	1.08
ENSMUSG00000046201	chr17:3114972:3115418:+@chr17:3122053:3122114:+@chr17:3145075:3145158:+	0.24	0.16	0.33	0.45	0.32	0.58	0.24	0.16	0.33	0.35	0.23	0.49	-0.21	5.33	-0.11	0.48
NA	chr2:156547576:156547883:+@chr2:156549885:156549990:+@chr2:156550649:156551449:+	0.04	0.01	0.09	0.11	0.03	0.21	0.04	0.01	0.09	0.19	0.09	0.33	-0.07	0.35	-0.15	5.42
ENSMUSG00000032679	chr2:104095801:104095927:+@chr2:104097725:104097844:+@chr2:104104171:104104249:+	0.26	0.16	0.38	0.13	0.06	0.21	0.26	0.16	0.38	0.09	0.04	0.16	0.13	1.06	0.17	4.71
ENSMUSG00000046862	chr4:143412426:143413091:+@chr4:143415349:143415413:+@chr4:143416640:143416952:+	0.69	0.55	0.84	0.64	0.39	0.85	0.69	0.55	0.84	0.41	0.21	0.59	0.05	0.37	0.28	5.32
ENSMUSG00000001123	chr11:78971317:78971427:-@chr11:78969714:78969806:-@chr11:78967998:78968033:-	0.13	0.08	0.2	0.04	0.01	0.09	0.13	0.08	0.2	0.04	0.02	0.08	0.09	2.24	0.09	3.37
ENSMUSG00000021133	chr12:80828026:80828243:+@chr12:80851214:80851276:+@chr12:80868427:80868624:+	0.16	0.1	0.24	0.32	0.22	0.44	0.16	0.1	0.24	0.33	0.24	0.43	-0.16	2.33	-0.17	3.19
ENSMUSG00000031169	chrX:8205565:8205733:-@chrX:8204196:8204317:-@chrX:8203792:8203835:-	0.91	0.8	0.98	0.82	0.62	0.96	0.91	0.8	0.98	0.64	0.46	0.8	0.09	0.32	0.27	5.11
ENSMUSG00000058291	chr5:138617055:138617167:-@chr5:138616470:138616559:-@chr5:138612039:138612165:-	0.08	0.03	0.16	0.32	0.16	0.56	0.08	0.03	0.16	0.23	0.08	0.47	-0.24	4.64	-0.15	0.77
ENSMUSG00000024446	chr17:36257783:36257846:-@chr17:36257606:36257706:-@chr17:36257442:36257524:-	0.78	0.69	0.86	0.96	0.86	1	0.78	0.69	0.86	0.86	0.72	0.95	-0.18	4.99	-0.08	0.37
NA	chr2:3220253:3220369:+@chr2:3223470:3223584:+@chr2:3224818:3227809:+	0.92	0.78	0.99	0.58	0.35	0.86	0.92	0.78	0.99	0.91	0.78	0.98	0.34	5.14	0.01	0.18
ENSMUSG00000017686	chr11:80254660:80254862:+@chr11:80255862:80255957:+@chr11:80257514:80257636:+	0.19	0.11	0.28	0.39	0.26	0.56	0.19	0.11	0.28	0.36	0.22	0.52	-0.2	3.95	-0.17	1.3
ENSMUSG00000027333	chr2:131522059:131522219:+@chr2:131524244:131524333:+@chr2:131524743:131525183:+	0.35	0.18	0.54	0.61	0.37	0.81	0.35	0.18	0.54	0.08	0.02	0.24	-0.26	1.59	0.27	3.66
ENSMUSG00000019977	chr10:21307585:21307779:+@chr10:21309099:21309314:+@chr10:21336967:21337075:+	0.13	0.1	0.16	0.07	0.04	0.1	0.13	0.1	0.16	0.09	0.06	0.13	0.06	5.02	0.04	0.19
ENSMUSG00000038518	chr13:44731713:44731916:+@chr13:44758849:44759018:+@chr13:44823380:44823515:+	0.01	0	0.02	0.04	0.03	0.07	0.01	0	0.02	0.04	0.02	0.07	-0.03	3.47	-0.03	1.71
ENSMUSG00000042323	chr14:31107109:31107310:+@chr14:31110415:31110579:+@chr14:31113849:31114004:+	0.42	0.32	0.54	0.36	0.19	0.57	0.42	0.32	0.54	0.19	0.1	0.33	0.06	0.35	0.23	4.8
ENSMUSG00000055897	chr2:173608733:173608879:-@chr2:173600766:173601042:-@chr2:173597040:173597187:-	0.06	0.01	0.18	0.41	0.15	0.89	0.06	0.01	0.18	0.1	0.01	0.32	-0.35	4.92	-0.04	0.22
ENSMUSG00000052534	chr1:168191278:168191437:-@chr1:168184956:168185068:-@chr1:168183530:168183619:-	0.26	0.12	0.45	0.61	0.36	0.9	0.26	0.12	0.45	0.1	0.03	0.22	-0.35	4.25	0.16	0.88
ENSMUSG00000033364	chr1:74461566:74461730:-@chr1:74459915:74459980:-@chr1:74456079:74456220:-	0.73	0.6	0.84	0.61	0.43	0.78	0.73	0.6	0.84	0.48	0.31	0.65	0.12	0.48	0.25	4.63
ENSMUSG00000017550	chr11:80097953:80098049:+@chr11:80100314:80100475:+@chr11:80101782:80101908:+	0.96	0.87	1	0.8	0.63	0.94	0.96	0.87	1	0.73	0.49	0.91	0.16	1.72	0.23	3.38
ENSMUSG00000020528	chr11:61761954:61762088:-@chr11:61756582:61756677:-@chr11:61756195:61756345:-	0.59	0.49	0.68	0.63	0.49	0.77	0.59	0.49	0.68	0.38	0.26	0.51	-0.04	0.26	0.21	4.79
ENSMUSG00000008976	chr16:84846124:84846369:+@chr16:84852460:84852654:+@chr16:84856462:84856515:+	0.93	0.89	0.97	0.79	0.66	0.9	0.93	0.89	0.97	0.79	0.7	0.88	0.14	1.45	0.14	3.6
ENSMUSG00000068036	chr17:13846434:13846639:+@chr17:13848355:13848375:+@chr17:13849108:13849253:+	0.02	0	0.04	0.12	0.05	0.22	0.02	0	0.04	0.08	0.02	0.17	-0.1	4.66	-0.06	0.38
ENSMUSG00000008200	chr2:90768516:90768700:+@chr2:90774750:90774848:+@chr2:90775905:90776221:+	0.05	0.03	0.09	0.16	0.09	0.25	0.05	0.03	0.09	0.1	0.05	0.18	-0.11	4.77	-0.05	0.19
ENSMUSG00000000441	chr6:115632897:115632995:-@chr6:115631215:115631368:-@chr6:115626939:115626966:-	0.96	0.88	1	0.74	0.57	0.89	0.96	0.88	1	0.81	0.63	0.93	0.22	3.95	0.15	0.99
ENSMUSG00000052446	chr8:71951066:71951160:+@chr8:71965794:71965920:+@chr8:71967899:71970333:+	0.21	0.15	0.3	0.33	0.22	0.47	0.21	0.15	0.3	0.43	0.29	0.59	-0.12	0.62	-0.22	4.28
ENSMUSG00000031229	chrX:105887715:105887839:-@chrX:105884307:105884420:-@chrX:105879909:105880015:-	0.77	0.69	0.84	0.92	0.84	0.98	0.77	0.69	0.84	0.87	0.74	0.95	-0.15	4.29	-0.1	0.56
ENSMUSG00000019373	chr11:59832884:59832933:-@chr11:59830147:59830307:-@chr11:59827846:59828025:-	0.63	0.57	0.7	0.75	0.65	0.87	0.63	0.57	0.7	0.79	0.69	0.89	-0.12	0.9	-0.16	3.92
ENSMUSG00000020829	chr11:78465701:78466005:+@chr11:78466351:78467203:+@chr11:78468625:78468708:+	0.97	0.89	1	0.75	0.58	0.91	0.97	0.89	1	0.82	0.63	0.97	0.22	4.11	0.15	0.68
ENSMUSG00000030849	chr7:130200983:130201173:-@chr7:130199758:130199905:-@chr7:130196178:130196374:-	0.42	0.22	0.84	0.11	0.01	0.51	0.42	0.22	0.84	0.35	0.06	0.8	0.31	4.1	0.07	0.69
ENSMUSG00000026464	chr1:133661237:133661380:-@chr1:133655345:133655398:-@chr1:133653973:133654032:-	0.41	0.24	0.64	0.75	0.52	0.95	0.41	0.24	0.64	0.43	0.23	0.63	-0.34	4.43	-0.02	0.35
ENSMUSG00000035851	chr5:86804490:86804591:+@chr5:86809305:86809340:+@chr5:86815629:86815730:+	0.13	0.06	0.22	0.25	0.13	0.42	0.13	0.06	0.22	0.36	0.19	0.54	-0.12	0.51	-0.23	4.27
NA	chr5:43981713:43981799:-@chr5:43980644:43980693:-@chr5:43978858:43979968:-	0.05	0.01	0.1	0.09	0.01	0.21	0.05	0.01	0.1	0.28	0.11	0.51	-0.04	0.16	-0.23	4.61
ENSMUSG00000056851	chr15:102484166:102484240:+@chr15:102485948:102486040:+@chr15:102487088:102487129:+	0.46	0.44	0.49	0.4	0.36	0.43	0.46	0.44	0.49	0.42	0.39	0.46	0.06	4.54	0.04	0.23
ENSMUSG00000032712	chr6:149310322:149310377:+@chr6:149317635:149317708:+@chr6:149325405:149329784:+	0.16	0.11	0.21	0.34	0.21	0.47	0.16	0.11	0.21	0.25	0.16	0.37	-0.18	4.27	-0.09	0.5
ENSMUSG00000015127	chr17:25228583:25228666:+@chr17:25229239:25229466:+@chr17:25230207:25230409:+	0.33	0.2	0.49	0.11	0.04	0.2	0.33	0.2	0.49	0.18	0.08	0.35	0.22	3.92	0.15	0.81
ENSMUSG00000037286	chr9:100643623:100643796:+@chr9:100663250:100663298:+@chr9:100705153:100705254:+	0.03	0	0.11	0.23	0.08	0.41	0.03	0	0.11	0.12	0.02	0.26	-0.2	4.4	-0.09	0.29
ENSMUSG00000039662	chr4:152298685:152298773:+@chr4:152299137:152299245:+@chr4:152299671:152299840:+	0.08	0.04	0.13	0.18	0.1	0.28	0.08	0.04	0.13	0.21	0.13	0.3	-0.1	1.1	-0.13	3.55
NA	chr2:156547576:156547883:+@chr2:156549885:156550027:+@chr2:156550649:156551449:+	0.08	0.04	0.14	0.22	0.12	0.33	0.08	0.04	0.14	0.27	0.14	0.43	-0.14	1.26	-0.19	3.34
ENSMUSG00000020821	chr11:70700548:70700709:+@chr11:70702372:70702551:+@chr11:70702772:70702905:+	0.4	0.28	0.54	0.5	0.34	0.7	0.4	0.28	0.54	0.69	0.51	0.86	-0.1	0.41	-0.29	4.18
NA	chr13:114818237:114818323:+@chr13:114819336:114819457:+@chr13:114820802:114820946:+	0.72	0.61	0.81	0.91	0.8	0.98	0.72	0.61	0.81	0.81	0.67	0.91	-0.19	4.16	-0.09	0.36
ENSMUSG00000030822	chr7:127470985:127471119:+@chr7:127471906:127471977:+@chr7:127472098:127472266:+	0.72	0.57	0.85	0.45	0.27	0.65	0.72	0.57	0.85	0.62	0.42	0.82	0.27	4.09	0.1	0.43
ENSMUSG00000075415	chr2:31054024:31054218:-@chr2:31052985:31053167:-@chr2:31044882:31044896:-	0.33	0.23	0.45	0.18	0.09	0.32	0.33	0.23	0.45	0.14	0.07	0.24	0.15	0.91	0.19	3.6
ENSMUSG00000029142	chr5:31613951:31614022:+@chr5:31614603:31614621:+@chr5:31616381:31616487:+	0.92	0.9	0.93	0.93	0.9	0.95	0.92	0.9	0.93	0.96	0.94	0.98	-0.01	0.05	-0.04	4.45
ENSMUSG00000026790	chr2:29889720:29889921:+@chr2:29890771:29891002:+@chr2:29892186:29892276:+	0.04	0.03	0.06	0.02	0.01	0.04	0.04	0.03	0.06	0.01	0	0.02	0.02	0.12	0.03	4.38
ENSMUSG00000039275	chr11:121298559:121298855:+@chr11:121299584:121299793:+@chr11:121306768:121309896:+	0.88	0.83	0.94	0.78	0.66	0.9	0.88	0.83	0.94	0.69	0.56	0.85	0.1	0.46	0.19	4.04
ENSMUSG00000024969	chr19:7282726:7282823:-@chr19:7281798:7281959:-@chr19:7280998:7281255:-	0.59	0.4	0.78	0.53	0.34	0.77	0.59	0.4	0.78	0.3	0.16	0.51	0.06	0.41	0.29	4.08
ENSMUSG00000047909	chr2:11784291:11784452:+@chr2:11785123:11785260:+@chr2:11786224:11786302:+	0.3	0.21	0.41	0.27	0.13	0.46	0.3	0.21	0.41	0.11	0.04	0.25	0.03	0.29	0.19	4.16
ENSMUSG00000052144	chr6:100864679:100864753:+@chr6:100865074:100865217:+@chr6:100865788:100866083:+	0.91	0.88	0.94	0.83	0.78	0.88	0.91	0.88	0.94	0.82	0.76	0.87	0.08	1.94	0.09	2.5
ENSMUSG00000039108	chr2:180031361:180031528:+@chr2:180031794:180031871:+@chr2:180032061:180032222:+	0.82	0.76	0.88	0.93	0.86	0.98	0.82	0.76	0.88	0.95	0.88	0.98	-0.11	1.58	-0.13	2.84
ENSMUSG00000018501	chr11:62351378:62351546:-@chr11:62349395:62349493:-@chr11:62345235:62345318:-	0.73	0.61	0.85	0.46	0.3	0.65	0.73	0.61	0.85	0.84	0.66	0.96	0.27	3.95	-0.11	0.47
ENSMUSG00000024558	chr18:73969891:73971276:-@chr18:73937130:73937274:-@chr18:73935006:73935167:-	0.85	0.65	0.96	0.88	0.69	0.98	0.85	0.65	0.96	0.47	0.19	0.76	-0.03	0.26	0.38	4.08
ENSMUSG00000020792	chr11:116300266:116300433:-@chr11:116297571:116297663:-@chr11:116295544:116295689:-	0.08	0.02	0.16	0.23	0.11	0.38	0.08	0.02	0.16	0.27	0.14	0.43	-0.15	1.2	-0.19	3.13
ENSMUSG00000034354	chr11:4487234:4488632:-@chr11:4485879:4485989:-@chr11:4485363:4485451:-	0.21	0.13	0.29	0.36	0.23	0.53	0.21	0.13	0.29	0.4	0.27	0.55	-0.15	1.15	-0.19	3.15
ENSMUSG00000044442	chr16:87362520:87362603:+@chr16:87366139:87366280:+@chr16:87367465:87368649:+	0.64	0.53	0.75	0.8	0.63	0.93	0.64	0.53	0.75	0.37	0.22	0.62	-0.16	0.79	0.27	3.5
ENSMUSG00000014767	chr17:15499888:15500024:+@chr17:15501312:15501357:+@chr17:15502965:15503128:+	0.06	0.03	0.1	0.15	0.06	0.29	0.06	0.03	0.1	0.23	0.12	0.37	-0.09	0.43	-0.17	3.83
ENSMUSG00000001017	chr3:90506108:90506261:-@chr3:90505395:90505478:-@chr3:90503096:90503282:-	0	0	0.01	0.02	0	0.04	0	0	0.01	0.03	0.01	0.07	-0.02	0.14	-0.03	4.12
ENSMUSG00000033931	chr8:126965382:126965622:-@chr8:126961912:126961971:-@chr8:126959542:126959585:-	0.51	0.41	0.6	0.72	0.57	0.85	0.51	0.41	0.6	0.59	0.43	0.75	-0.21	3.89	-0.08	0.35
ENSMUSG00000037536	chr14:47472561:47472717:+@chr14:47526205:47526314:+@chr14:47529175:47531962:+	0.48	0.32	0.65	0.44	0.26	0.65	0.48	0.32	0.65	0.23	0.1	0.4	0.04	0.37	0.25	3.87
ENSMUSG00000028857	chr4:133277531:133277790:-@chr4:133270963:133271047:-@chr4:133269778:133269809:-	0.97	0.9	1	0.78	0.63	0.92	0.97	0.9	1	0.93	0.8	0.99	0.19	4.04	0.04	0.13
ENSMUSG00000001517	chr6:128370957:128371085:+@chr6:128371968:128372012:+@chr6:128372534:128372603:+	0.59	0.48	0.69	0.83	0.67	0.94	0.59	0.48	0.69	0.72	0.59	0.84	-0.24	3.52	-0.13	0.63
ENSMUSG00000062270	chr9:90107235:90107302:-@chr9:90103655:90103768:-@chr9:90102300:90102386:-	0.02	0.02	0.03	0.03	0.02	0.04	0.02	0.02	0.03	0.04	0.03	0.05	-0.01	0	-0.02	4.15
ENSMUSG00000060261	chr5:134314383:134314746:-@chr5:134306532:134306731:-@chr5:134295510:134295613:-	0.23	0.15	0.32	0.06	0	0.17	0.23	0.15	0.32	0.19	0.07	0.34	0.17	3.89	0.04	0.25
ENSMUSG00000026131	chr1:34299721:34299838:+@chr1:34301861:34301932:+@chr1:34302830:34303032:+	0.14	0.09	0.2	0.04	0.01	0.09	0.14	0.09	0.2	0.06	0.02	0.13	0.1	3.44	0.08	0.7
ENSMUSG00000035495	chr4:46138380:46138475:-@chr4:46137321:46137428:-@chr4:46135387:46135594:-	0.05	0.01	0.12	0.24	0.11	0.42	0.05	0.01	0.12	0.08	0.01	0.21	-0.19	3.99	-0.03	0.14
ENSMUSG00000031078	chr7:144452027:144452137:-@chr7:144450978:144451088:-@chr7:144449560:144449615:-	0.86	0.81	0.91	0.75	0.68	0.81	0.86	0.81	0.91	0.79	0.73	0.85	0.11	3.61	0.07	0.51
ENSMUSG00000090266	chr11:116843515:116843774:+@chr11:116845763:116845945:+@chr11:116848254:116848358:+	0.12	0.07	0.19	0.11	0.04	0.21	0.12	0.07	0.19	0.02	0	0.07	0.01	0.15	0.1	3.96
ENSMUSG00000039087	chr13:37929558:37932489:+@chr13:37941543:37941704:+@chr13:37946857:37947663:+	0.67	0.51	0.81	0.65	0.46	0.82	0.67	0.51	0.81	0.93	0.78	0.99	0.02	0.32	-0.26	3.71
ENSMUSG00000037514	chr2:131273911:131274263:+@chr2:131287474:131287597:+@chr2:131293399:131293524:+	0.56	0.45	0.67	0.68	0.53	0.82	0.56	0.45	0.67	0.81	0.62	0.96	-0.12	0.55	-0.25	3.46
ENSMUSG00000052337	chr6:71851772:71851880:+@chr6:71852730:71852867:+@chr6:71856912:71857048:+	0.76	0.68	0.83	0.6	0.52	0.69	0.76	0.68	0.83	0.65	0.56	0.74	0.16	3.36	0.11	0.64
ENSMUSG00000002147	chr10:127647685:127647823:+@chr10:127648106:127648189:+@chr10:127650696:127650834:+	0.88	0.63	0.99	0.54	0.29	0.8	0.88	0.63	0.99	0.9	0.67	0.99	0.34	3.75	-0.02	0.25
ENSMUSG00000025137	chr11:120613379:120613423:-@chr11:120613030:120613083:-@chr11:120612463:120612601:-	0.32	0.19	0.48	0.12	0.04	0.23	0.32	0.19	0.48	0.2	0.09	0.34	0.2	3.5	0.12	0.49
ENSMUSG00000036782	chrX:23315130:23315201:-@chrX:23294215:23294280:-@chrX:23261435:23261573:-	0.18	0.15	0.22	0.19	0.15	0.24	0.18	0.15	0.22	0.27	0.22	0.33	-0.01	0.08	-0.09	3.83
ENSMUSG00000058586	chr15:83114357:83114439:+@chr15:83115567:83115663:+@chr15:83116257:83116671:+	0.3	0.22	0.39	0.39	0.27	0.53	0.3	0.22	0.39	0.52	0.37	0.69	-0.09	0.38	-0.22	3.53
ENSMUSG00000029817	chr6:49263838:49264052:-@chr6:49252803:49253108:-@chr6:49252382:49252515:-	0.52	0.48	0.56	0.63	0.56	0.69	0.52	0.48	0.56	0.61	0.54	0.68	-0.11	2.7	-0.09	1.19
ENSMUSG00000069601	chr10:69904448:69904510:+@chr10:69920438:69920491:+@chr10:69927695:69927818:+	0.64	0.23	0.98	0.68	0.28	0.98	0.64	0.23	0.98	0.22	0.03	0.58	-0.04	1.01	0.42	2.87
ENSMUSG00000085396	chrX:50573224:50573351:-@chrX:50573015:50573141:-@chrX:50569277:50570291:-	0.38	0.29	0.48	0.43	0.29	0.56	0.38	0.29	0.48	0.59	0.46	0.75	-0.05	0.26	-0.21	3.61
ENSMUSG00000097039	chr15:62107148:62107465:+@chr15:62149239:62149352:+@chr15:62175467:62175548:+	0.17	0.06	0.32	0.49	0.26	0.79	0.17	0.06	0.32	0.21	0.07	0.46	-0.32	3.55	-0.04	0.29
ENSMUSG00000061079	chr7:110071372:110071455:+@chr7:110072119:110072202:+@chr7:110074068:110074264:+	0.91	0.78	0.99	0.64	0.41	0.84	0.91	0.78	0.99	0.81	0.64	0.94	0.27	3.42	0.1	0.37
ENSMUSG00000037300	chr8:124709903:124709973:-@chr8:124699656:124699721:-@chr8:124690277:124690359:-	0.38	0.22	0.59	0.74	0.48	0.9	0.38	0.22	0.59	0.4	0.24	0.59	-0.36	3.41	-0.02	0.34
ENSMUSG00000020250	chr10:82859206:82859300:+@chr10:82860524:82860630:+@chr10:82874613:82874735:+	0.56	0.51	0.6	0.65	0.58	0.71	0.56	0.51	0.6	0.66	0.59	0.73	-0.09	0.95	-0.1	2.79
ENSMUSG00000021224	chr12:83876668:83876812:-@chr12:83855440:83855524:-@chr12:83842218:83842358:-	0.66	0.53	0.79	0.67	0.47	0.84	0.66	0.53	0.79	0.42	0.27	0.59	-0.01	0.3	0.24	3.41
ENSMUSG00000034327	chr14:67733347:67733442:+@chr14:67734141:67734290:+@chr14:67737606:67737711:+	0.92	0.83	0.97	0.72	0.55	0.87	0.92	0.83	0.97	0.74	0.59	0.89	0.2	2.02	0.18	1.69
ENSMUSG00000024188	chr17:26252910:26253091:+@chr17:26253974:26254044:+@chr17:26255031:26255125:+	0.51	0.4	0.61	0.37	0.25	0.49	0.51	0.4	0.61	0.29	0.18	0.44	0.14	0.81	0.22	2.89
ENSMUSG00000038866	chr1:106015999:106016093:+@chr1:106018219:106018302:+@chr1:106019848:106019905:+	0.81	0.66	0.93	0.75	0.48	0.95	0.81	0.66	0.93	0.51	0.3	0.72	0.06	0.43	0.3	3.27
ENSMUSG00000034252	chr9:80066903:80067572:+@chr9:80087430:80087523:+@chr9:80092267:80092412:+	0.8	0.65	0.92	0.53	0.34	0.73	0.8	0.65	0.92	0.85	0.68	0.97	0.27	3.4	-0.05	0.28
ENSMUSG00000030602	chr7:28598035:28598184:-@chr7:28570172:28570313:-@chr7:28569793:28569866:-	0.24	0.16	0.33	0.48	0.31	0.7	0.24	0.16	0.33	0.22	0.1	0.38	-0.24	3.41	0.02	0.23
ENSMUSG00000089984	chr5:137618384:137618515:-@chr5:137613673:137613843:-@chr5:137612503:137613119:-	0.73	0.38	0.96	0.87	0.58	1	0.73	0.38	0.96	0.26	0.08	0.59	-0.14	0.65	0.47	2.96
ENSMUSG00000039953	chr4:149614050:149614172:+@chr4:149626087:149626116:+@chr4:149627212:149627407:+	0.22	0.13	0.33	0.39	0.21	0.59	0.22	0.13	0.33	0.44	0.27	0.63	-0.17	0.96	-0.22	2.64
ENSMUSG00000028797	chr4:129600983:129601134:+@chr4:129601407:129601533:+@chr4:129602195:129602261:+	0.2	0.13	0.27	0.19	0.09	0.32	0.2	0.13	0.27	0.36	0.26	0.48	0.01	0.17	-0.16	3.41
ENSMUSG00000041229	chrX:151570342:151570431:+@chrX:151572366:151572668:+@chrX:151573413:151573516:+	0.47	0.34	0.61	0.55	0.31	0.83	0.47	0.34	0.61	0.24	0.14	0.37	-0.08	0.42	0.23	3.16
ENSMUSG00000022150	chr15:6424197:6424250:+@chr15:6424635:6424697:+@chr15:6430954:6431107:+	0.93	0.9	0.96	0.97	0.95	0.99	0.93	0.9	0.96	0.98	0.96	0.99	-0.04	0.54	-0.05	3.02
ENSMUSG00000036257	chr12:44299234:44299291:+@chr12:44304911:44305105:+@chr12:44307919:44308114:+	0.88	0.78	0.96	0.73	0.6	0.85	0.88	0.78	0.96	0.7	0.56	0.85	0.15	1.57	0.18	1.99
ENSMUSG00000005899	chr16:17619354:17619434:+@chr16:17620712:17620762:+@chr16:17621442:17621525:+	0.04	0.02	0.08	0.07	0.02	0.15	0.04	0.02	0.08	0.16	0.09	0.26	-0.03	0.12	-0.12	3.42
ENSMUSG00000022890	chr16:84835421:84835574:-@chr16:84834809:84834983:-@chr16:84831329:84831507:-	0.76	0.7	0.83	0.66	0.59	0.73	0.76	0.7	0.83	0.63	0.55	0.71	0.1	1.03	0.13	2.5
ENSMUSG00000038351	chr11:74865085:74865211:-@chr11:74863560:74863694:-@chr11:74859746:74859899:-	0.44	0.22	0.64	0.51	0.22	0.8	0.44	0.22	0.64	0.13	0.01	0.32	-0.07	0.52	0.31	3
ENSMUSG00000071379	chr12:17690814:17691046:+@chr12:17767214:17767299:+@chr12:17786147:17786548:+	0.18	0.1	0.28	0.05	0.01	0.11	0.18	0.1	0.28	0.06	0.02	0.13	0.13	2.08	0.12	1.43
ENSMUSG00000036552	chr17:15059344:15059469:+@chr17:15059766:15059984:+@chr17:15061069:15061182:+	0.72	0.52	0.89	0.4	0.22	0.62	0.72	0.52	0.89	0.69	0.48	0.89	0.32	3.09	0.03	0.41
ENSMUSG00000028164	chr3:135563205:135563349:+@chr3:135563679:135563797:+@chr3:135566488:135566630:+	0.08	0.05	0.11	0.18	0.12	0.25	0.08	0.05	0.11	0.12	0.07	0.18	-0.1	3.29	-0.04	0.17
ENSMUSG00000029823	chr6:38551444:38551908:+@chr6:38554980:38555063:+@chr6:38570510:38570604:+	0.04	0.02	0.07	0.15	0.08	0.23	0.04	0.02	0.07	0.06	0.03	0.12	-0.11	3.35	-0.02	0.09
NA	chr11:78188427:78188511:+@chr11:78189178:78189390:+@chr11:78189571:78189662:+	0.97	0.89	1	0.78	0.59	0.91	0.97	0.89	1	0.85	0.66	0.97	0.19	2.93	0.12	0.5
ENSMUSG00000028863	chr4:125102839:125103031:+@chr4:125107652:125107709:+@chr4:125108323:125108356:+	0.4	0.27	0.56	0.2	0.09	0.34	0.4	0.27	0.56	0.28	0.15	0.47	0.2	2.87	0.12	0.56
ENSMUSG00000024002	chr17:32225576:32225713:-@chr17:32224859:32224986:-@chr17:32224087:32224222:-	0.02	0.01	0.03	0.07	0.04	0.11	0.02	0.01	0.03	0.07	0.04	0.11	-0.05	1.25	-0.05	2.17
ENSMUSG00000000827	chr2:181501905:181502053:+@chr2:181502876:181502935:+@chr2:181508166:181508267:+	0.82	0.77	0.86	0.88	0.83	0.93	0.82	0.77	0.86	0.91	0.86	0.95	-0.06	0.5	-0.09	2.91
NA	chr17:28322646:28322771:+@chr17:28323571:28323665:+@chr17:28326152:28326574:+	0.04	0.01	0.1	0.19	0.08	0.32	0.04	0.01	0.1	0.1	0.02	0.23	-0.15	3.2	-0.06	0.2
ENSMUSG00000031109	chrX:49286856:49286904:-@chrX:49168641:49168784:-@chrX:49080617:49080751:-	0.58	0.3	0.84	0.73	0.34	0.99	0.58	0.3	0.84	0.21	0.02	0.67	-0.15	0.76	0.37	2.63
ENSMUSG00000051278	chr3:127573140:127573325:+@chr3:127581446:127581569:+@chr3:127583584:127584170:+	0.57	0.36	0.79	0.2	0.04	0.54	0.57	0.36	0.79	0.69	0.33	0.94	0.37	2.72	-0.12	0.66
ENSMUSG00000019590	chr11:105944111:105944147:-@chr11:105940100:105940378:-@chr11:105937629:105937840:-	0.3	0.16	0.46	0.1	0.02	0.25	0.3	0.16	0.46	0.56	0.27	0.92	0.2	2.23	-0.26	1.15
ENSMUSG00000031565	chr8:25532250:25532428:+@chr8:25555508:25555774:+@chr8:25557731:25557814:+	0.72	0.65	0.79	0.7	0.6	0.79	0.72	0.65	0.79	0.58	0.51	0.66	0.02	0.16	0.14	3.2
NA	chr7:105914494:105914547:-@chr7:105913614:105913753:-@chr7:105895119:105903847:-	0.08	0.02	0.15	0.23	0.13	0.39	0.08	0.02	0.15	0.16	0.07	0.26	-0.15	2.95	-0.08	0.4
ENSMUSG00000033282	chr8:91287586:91287732:-@chr8:91286234:91286307:-@chr8:91280718:91280857:-	0.72	0.36	0.97	0.3	0.05	0.74	0.72	0.36	0.97	0.86	0.57	0.99	0.42	2.71	-0.14	0.63
ENSMUSG00000097462	chr6:93238170:93238344:+@chr6:93270953:93271143:+@chr6:93271657:93271754:+	0.44	0.05	0.92	0.51	0.06	0.95	0.44	0.05	0.92	0.52	0.06	0.98	-0.07	1.37	-0.08	1.96
ENSMUSG00000031174	chrX:10178271:10178336:-@chrX:10176003:10176881:-@chrX:10166076:10166276:-	0.01	0.01	0.03	0.03	0.01	0.08	0.01	0.01	0.03	0.08	0.04	0.14	-0.02	0.05	-0.07	3.25
ENSMUSG00000022185	chr14:54679241:54679352:-@chr14:54678743:54678862:-@chr14:54667073:54667161:-	0.36	0.28	0.44	0.53	0.4	0.66	0.36	0.28	0.44	0.51	0.39	0.63	-0.17	2.21	-0.15	1.08
ENSMUSG00000037395	chr1:192116269:192116346:-@chr1:192108644:192108701:-@chr1:192101384:192101867:-	0.69	0.39	0.93	0.3	0.09	0.58	0.69	0.39	0.93	0.71	0.47	0.89	0.39	2.82	-0.02	0.47
ENSMUSG00000062939	chr1:52008244:52008728:+@chr1:52011783:52011911:+@chr1:52013790:52013934:+	0.93	0.84	0.99	0.69	0.49	0.86	0.93	0.84	0.99	0.93	0.76	1	0.24	3.1	0	0.18
ENSMUSG00000028797	chr4:129600983:129601134:+@chr4:129601407:129601625:+@chr4:129601870:129601961:+	0.19	0.12	0.26	0.2	0.1	0.34	0.19	0.12	0.26	0.41	0.24	0.64	-0.01	0.17	-0.22	3.11
NA	chr1:162676691:162676817:-@chr1:162674099:162674151:-@chr1:162671785:162673656:-	0.3	0.24	0.38	0.45	0.33	0.58	0.3	0.24	0.38	0.47	0.34	0.62	-0.15	1.31	-0.17	1.96
ENSMUSG00000024127	chr17:85090106:85090267:-@chr17:85088340:85088439:-@chr17:85083193:85083315:-	0.41	0.29	0.52	0.22	0.13	0.33	0.41	0.29	0.52	0.33	0.23	0.44	0.19	2.96	0.08	0.31
ENSMUSG00000004018	chr11:26434432:26434500:+@chr11:26459686:26459836:+@chr11:26468335:26468418:+	0.95	0.9	0.98	0.85	0.75	0.93	0.95	0.9	0.98	0.82	0.7	0.9	0.1	0.73	0.13	2.53
ENSMUSG00000000884	chr16:18548093:18548191:+@chr16:18548935:18549059:+@chr16:18552367:18552582:+	0.03	0	0.11	0.05	0	0.15	0.03	0	0.11	0.24	0.07	0.46	-0.02	0.1	-0.21	3.14
NA	chr8:78821048:78821152:-@chr8:78819987:78820085:-@chr8:78812976:78813080:-	0.65	0.6	0.7	0.7	0.63	0.77	0.65	0.6	0.7	0.78	0.7	0.85	-0.05	0.2	-0.13	3.04
ENSMUSG00000026771	chr2:23543197:23543324:-@chr2:23541519:23541615:-@chr2:23537461:23537638:-	0.29	0.16	0.43	0.07	0.01	0.22	0.29	0.16	0.43	0.38	0.22	0.55	0.22	2.84	-0.09	0.4
ENSMUSG00000034055	chrX:102559565:102559734:-@chrX:102557096:102557272:-@chrX:102555526:102555617:-	0.91	0.76	0.99	0.88	0.63	0.99	0.91	0.76	0.99	0.56	0.26	0.86	0.03	0.23	0.35	2.99
NA	chr11:3521817:3521968:-@chr11:3520848:3520916:-@chr11:3517522:3517827:-	0.61	0.41	0.83	0.9	0.71	0.99	0.61	0.41	0.83	0.51	0.23	0.81	-0.29	2.65	0.1	0.56
ENSMUSG00000031918	chr9:13749181:13749400:+@chr9:13760418:13760488:+@chr9:13782277:13782382:+	0.43	0.3	0.56	0.68	0.49	0.82	0.43	0.3	0.56	0.5	0.29	0.73	-0.25	2.79	-0.07	0.38
NA	chr11:29692898:29693693:+@chr11:29705535:29705591:+@chr11:29733633:29733840:+	0.07	0.05	0.1	0.14	0.09	0.19	0.07	0.05	0.1	0.13	0.1	0.18	-0.07	1.57	-0.06	1.6
ENSMUSG00000007739	chr11:22990593:22990880:+@chr11:22993267:22993319:+@chr11:22995930:22996038:+	0.96	0.89	0.99	0.93	0.82	0.99	0.96	0.89	0.99	0.77	0.64	0.92	0.03	0.13	0.19	3.04
ENSMUSG00000052688	chr1:131705596:131705721:+@chr1:131710678:131710711:+@chr1:131711620:131713464:+	0.21	0.02	0.58	0.6	0.22	0.94	0.21	0.02	0.58	0.19	0.01	0.67	-0.39	2.46	0.02	0.7
ENSMUSG00000048126	chr1:90815951:90816535:-@chr1:90813215:90813814:-@chr1:90811259:90811831:-	0.91	0.82	0.97	0.86	0.71	0.98	0.91	0.82	0.97	0.75	0.63	0.87	0.05	0.27	0.16	2.89
ENSMUSG00000000301	chr11:60046340:60046485:-@chr11:60031713:60031820:-@chr11:59983443:59983558:-	0.83	0.66	0.97	0.47	0.18	0.8	0.83	0.66	0.97	0.82	0.47	0.97	0.36	2.74	0.01	0.41
ENSMUSG00000029634	chr5:146220402:146220484:-@chr5:146219265:146219342:-@chr5:146217901:146218096:-	0.01	0	0.05	0.11	0.05	0.23	0.01	0	0.05	0.02	0	0.05	-0.1	3.1	-0.01	0.04
ENSMUSG00000029152	chr5:73292794:73292976:+@chr5:73293966:73294010:+@chr5:73294285:73294347:+	0.25	0.19	0.3	0.33	0.26	0.42	0.25	0.19	0.3	0.38	0.29	0.48	-0.08	0.55	-0.13	2.59
ENSMUSG00000006498	chr10:79860824:79860969:+@chr10:79862014:79862047:+@chr10:79862449:79862541:+	0.98	0.97	0.99	0.93	0.89	0.96	0.98	0.97	0.99	0.94	0.9	0.97	0.05	1.72	0.04	1.42
ENSMUSG00000020740	chr11:115588856:115588972:-@chr11:115588312:115588545:-@chr11:115587936:115588003:-	0.95	0.84	1	0.72	0.51	0.9	0.95	0.84	1	0.86	0.72	0.97	0.23	2.67	0.09	0.45
ENSMUSG00000074643,ENSMUSG00000027618,ENSMUSG00000089824	chr2:156111828:156111909:-@chr2:156103349:156103429:-@chr2:156098230:156098372:-	0.45	0.3	0.65	0.76	0.45	0.98	0.45	0.3	0.65	0.42	0.18	0.7	-0.31	2.57	0.03	0.52
ENSMUSG00000040594	chr11:33441803:33441938:-@chr11:33404038:33404199:-@chr11:33329471:33329544:-	0.18	0.12	0.25	0.23	0.12	0.37	0.18	0.12	0.25	0.39	0.24	0.59	-0.05	0.23	-0.21	2.86
ENSMUSG00000040451	chr19:32289541:32289631:-@chr19:32259976:32260097:-@chr19:32247994:32248036:-	0.03	0	0.09	0.24	0.07	0.55	0.03	0	0.09	0.12	0.02	0.27	-0.21	2.6	-0.09	0.48
NA	chr1:191575734:191575951:+@chr1:191582399:191582528:+@chr1:191583179:191583325:+	0.95	0.89	0.99	0.79	0.64	0.91	0.95	0.89	0.99	0.86	0.74	0.95	0.16	2.77	0.09	0.31
ENSMUSG00000017390	chr11:78325642:78325816:+@chr11:78325935:78326134:+@chr11:78326262:78326760:+	0.94	0.85	0.99	0.85	0.67	0.97	0.94	0.85	0.99	0.7	0.42	0.91	0.09	0.32	0.24	2.76
ENSMUSG00000068917	chr3:89164805:89165106:+@chr3:89166682:89166814:+@chr3:89167035:89167204:+	0.03	0.01	0.07	0.07	0	0.18	0.03	0.01	0.07	0.18	0.07	0.33	-0.04	0.14	-0.15	2.93
ENSMUSG00000029651	chr5:148298252:148298325:+@chr5:148301398:148301496:+@chr5:148303483:148303602:+	0.43	0.15	0.79	0.09	0	0.33	0.43	0.15	0.79	0.41	0.08	0.9	0.34	2.11	0.02	0.96
ENSMUSG00000042632	chr15:79328089:79328371:-@chr15:79327635:79327714:-@chr15:79317761:79318010:-	0.7	0.56	0.85	0.58	0.4	0.75	0.7	0.56	0.85	0.45	0.27	0.63	0.12	0.49	0.25	2.57
ENSMUSG00000038368	chr4:88185880:88186082:+@chr4:88196759:88197016:+@chr4:88229323:88229427:+	0.62	0.46	0.77	0.79	0.52	0.96	0.62	0.46	0.77	0.37	0.22	0.54	-0.17	0.7	0.25	2.33
ENSMUSG00000018501	chr11:62366964:62367159:-@chr11:62359761:62359934:-@chr11:62358855:62359015:-	0.4	0.32	0.48	0.26	0.15	0.39	0.4	0.32	0.48	0.24	0.15	0.35	0.14	0.99	0.16	2.04
ENSMUSG00000033335	chr9:21489743:21489794:+@chr9:21490658:21490669:+@chr9:21494504:21494617:+	0.73	0.64	0.81	0.61	0.46	0.75	0.73	0.64	0.81	0.53	0.37	0.69	0.12	0.55	0.2	2.48
ENSMUSG00000028906	chr4:131964131:131964187:-@chr4:131963929:131963970:-@chr4:131962924:131962986:-	0.24	0	0.68	0.59	0.17	0.96	0.24	0	0.68	0.22	0.02	0.67	-0.35	2.52	0.02	0.5
ENSMUSG00000030960,ENSMUSG00000030849	chr7:132850595:132850709:-@chr7:132837100:132837207:-@chr7:132827461:132827882:-	0.94	0.89	0.98	0.79	0.66	0.89	0.94	0.89	0.98	0.94	0.83	0.99	0.15	2.91	0	0.11
ENSMUSG00000057421	chrX:95947770:95947855:-@chrX:95947398:95947448:-@chrX:95946867:95947073:-	0.01	0	0.03	0.07	0.03	0.13	0.01	0	0.03	0.06	0.02	0.11	-0.06	2.14	-0.05	0.87
ENSMUSG00000022637	chr16:52031549:52031685:+@chr16:52032178:52032259:+@chr16:52033009:52033190:+	0.4	0.23	0.58	0.12	0.01	0.28	0.4	0.23	0.58	0.47	0.16	0.89	0.28	2.46	-0.07	0.55
ENSMUSG00000037426	chr5:32878628:32878677:+@chr5:32886979:32887048:+@chr5:32893375:32893453:+	0.94	0.82	0.99	0.86	0.67	0.97	0.94	0.82	0.99	0.68	0.42	0.89	0.08	0.32	0.26	2.69
ENSMUSG00000038861	chr3:94983983:94984919:+@chr3:94989303:94989347:+@chr3:94992966:94993193:+	0.07	0.02	0.16	0.28	0.12	0.5	0.07	0.02	0.16	0.16	0.03	0.36	-0.21	2.72	-0.09	0.28
NA	chrY:90751356:90751403:+@chrY:90752024:90752090:+@chrY:90753057:90753164:+	0.42	0.03	0.89	0.51	0.04	0.97	0.42	0.03	0.89	0.18	0	0.56	-0.09	1.97	0.24	1.02
ENSMUSG00000090100	chr2:120850056:120850418:-@chr2:120825242:120825315:-@chr2:120822473:120822608:-	0.65	0.32	0.92	0.67	0.23	0.97	0.65	0.32	0.92	0.24	0.03	0.59	-0.02	0.73	0.41	2.26
ENSMUSG00000028760	chr4:138082893:138082988:+@chr4:138084257:138084370:+@chr4:138096752:138096931:+	0.09	0.05	0.15	0.25	0.14	0.4	0.09	0.05	0.15	0.15	0.06	0.28	-0.16	2.77	-0.06	0.2
ENSMUSG00000035152	chr11:83350979:83351171:+@chr11:83364795:83364836:+@chr11:83365647:83365793:+	0.22	0.16	0.29	0.37	0.27	0.47	0.22	0.16	0.29	0.26	0.17	0.36	-0.15	2.79	-0.04	0.18
ENSMUSG00000037996	chr4:87226883:87227963:-@chr4:87176162:87176347:-@chr4:87073188:87073296:-	0.43	0.07	0.96	0.71	0.33	0.97	0.43	0.07	0.96	0.53	0.1	0.99	-0.28	1.68	-0.1	1.28
ENSMUSG00000012114	chr16:17683159:17683188:-@chr16:17680549:17680761:-@chr16:17674405:17674658:-	0.86	0.73	0.98	0.57	0.35	0.8	0.86	0.73	0.98	0.87	0.62	0.99	0.29	2.59	-0.01	0.36
ENSMUSG00000009739	chr15:100586644:100586772:-@chr15:100585875:100586128:-@chr15:100584031:100584159:-	0.42	0.07	0.94	0.45	0.07	0.89	0.42	0.07	0.94	0.78	0.5	0.99	-0.03	1.04	-0.36	1.9
ENSMUSG00000031433	chrX:139993298:139993502:-@chrX:139991516:139991587:-@chrX:139968196:139968599:-	0.04	0.01	0.11	0.18	0.06	0.38	0.04	0.01	0.11	0.2	0.08	0.35	-0.14	0.87	-0.16	2.07
ENSMUSG00000071337	chr6:86418878:86418932:+@chr6:86419694:86419812:+@chr6:86420324:86420411:+	0.22	0.12	0.36	0.06	0.01	0.2	0.22	0.12	0.36	0.08	0.03	0.16	0.16	1.49	0.14	1.45
ENSMUSG00000026150	chr1:82727228:82727336:+@chr1:82728067:82728238:+@chr1:82729216:82729436:+	0.05	0.03	0.07	0.01	0	0.03	0.05	0.03	0.07	0.04	0.02	0.06	0.04	2.88	0.01	0.05
ENSMUSG00000037926	chr11:77216287:77216515:+@chr11:77278146:77278226:+@chr11:77327453:77327496:+	0.53	0.1	0.93	0.48	0.01	0.92	0.53	0.1	0.93	0.55	0.02	1	0.05	1.27	-0.02	1.64
ENSMUSG00000030590	chr7:29154616:29154693:-@chr7:29154419:29154531:-@chr7:29153322:29153489:-	0.95	0.85	0.99	0.89	0.73	0.97	0.95	0.85	0.99	0.7	0.48	0.89	0.06	0.25	0.25	2.66
ENSMUSG00000064127	chrX:12693585:12693696:-@chrX:12689329:12689460:-@chrX:12687019:12687201:-	0.71	0.57	0.84	0.64	0.4	0.84	0.71	0.57	0.84	0.43	0.23	0.64	0.07	0.43	0.28	2.47
ENSMUSG00000039137	chr4:63431850:63432059:-@chr4:63429086:63429417:-@chr4:63419422:63419493:-	0.35	0.17	0.63	0.19	0	0.88	0.35	0.17	0.63	0.12	0.01	0.35	0.16	1.54	0.23	1.36
ENSMUSG00000029505	chr5:110770492:110770717:-@chr5:110768311:110768412:-@chr5:110755397:110756766:-	0.04	0.01	0.1	0.1	0.02	0.23	0.04	0.01	0.1	0.21	0.08	0.38	-0.06	0.25	-0.17	2.65
ENSMUSG00000020782	chr11:115854547:115854575:+@chr11:115854812:115854859:+@chr11:115855063:115855105:+	0.47	0.02	0.89	0.54	0.05	0.96	0.47	0.02	0.89	0.44	0.02	0.95	-0.07	1.5	0.03	1.4
ENSMUSG00000030556	chr7:67617993:67618130:-@chr7:67559858:67559969:-@chr7:67545366:67545468:-	0.8	0.64	0.94	0.81	0.46	0.99	0.8	0.64	0.94	0.54	0.36	0.72	-0.01	0.57	0.26	2.33
ENSMUSG00000078954	chr15:84757020:84757130:+@chr15:84757222:84757356:+@chr15:84765673:84765746:+	0.01	0	0.07	0.15	0.02	0.38	0.01	0	0.07	0.25	0.07	0.57	-0.14	0.48	-0.24	2.41
ENSMUSG00000045103	chrX:85190610:85190702:+@chrX:85197504:85197535:+@chrX:85202471:85205050:+	0.21	0.07	0.38	0.47	0.28	0.69	0.21	0.07	0.38	0.2	0.06	0.42	-0.26	2.56	0.01	0.33
ENSMUSG00000039205	chr2:32363805:32363979:+@chr2:32364219:32364334:+@chr2:32367303:32367532:+	0.58	0.33	0.91	0.61	0.27	0.94	0.58	0.33	0.91	0.23	0.05	0.52	-0.03	0.67	0.35	2.21
ENSMUSG00000021281	chr12:111444929:111445283:+@chr12:111445507:111446137:+@chr12:111448247:111448369:+	0.67	0.36	0.9	0.62	0.31	0.96	0.67	0.36	0.9	0.34	0.18	0.62	0.05	0.71	0.33	2.17
ENSMUSG00000037148	chr8:77277148:77277307:-@chr8:77259057:77259209:-@chr8:77257326:77257417:-	0.94	0.81	0.99	0.75	0.54	0.9	0.94	0.81	0.99	0.76	0.57	0.91	0.19	1.54	0.18	1.33
ENSMUSG00000026004	chr1:66735637:66735744:-@chr1:66728444:66728575:-@chr1:66726687:66726808:-	0.36	0.13	0.77	0.27	0.06	0.69	0.36	0.13	0.77	0.71	0.34	0.97	0.09	0.62	-0.35	2.24
ENSMUSG00000031393	chrX:74085510:74085636:-@chrX:74079909:74080032:-@chrX:74036982:74037332:-	0.62	0.42	0.84	0.35	0.17	0.55	0.62	0.42	0.84	0.62	0.41	0.82	0.27	2.44	0	0.42
ENSMUSG00000034187	chr11:103938165:103938216:-@chr11:103931076:103931123:-@chr11:103930730:103930815:-	0.38	0.08	0.82	0.37	0.05	0.95	0.38	0.08	0.82	0.68	0.19	0.99	0.01	1.07	-0.3	1.78
ENSMUSG00000031485	chr8:27045028:27045135:+@chr8:27045398:27045433:+@chr8:27045924:27045999:+	0.98	0.93	1	0.87	0.8	0.93	0.98	0.93	1	0.95	0.89	0.99	0.11	2.76	0.03	0.08
ENSMUSG00000031072	chr7:144917610:144917680:+@chr7:144919224:144919341:+@chr7:144928925:144930748:+	0.24	0.15	0.34	0.47	0.3	0.67	0.24	0.15	0.34	0.4	0.23	0.64	-0.23	2.18	-0.16	0.65
ENSMUSG00000039285	chr9:118059057:118059175:+@chr9:118061450:118061517:+@chr9:118061714:118063907:+	0.15	0.08	0.24	0.06	0.01	0.16	0.15	0.08	0.24	0.04	0	0.1	0.09	0.43	0.11	2.4
ENSMUSG00000058318	chr2:92187044:92187408:+@chr2:92201512:92201538:+@chr2:92214049:92214089:+	0.38	0	0.86	0.31	0.05	0.84	0.38	0	0.86	0.51	0.01	0.9	0.07	1.2	-0.13	1.62
ENSMUSG00000064177	chr6:113719322:113719454:-@chr6:113719110:113719223:-@chr6:113717053:113717161:-	0.44	0.1	0.96	0.43	0.04	0.9	0.44	0.1	0.96	0.49	0.02	0.97	0.01	1.29	-0.05	1.53
ENSMUSG00000041763	chr1:43983514:43983592:+@chr1:43985416:43985454:+@chr1:43990511:43990662:+	0.17	0.13	0.21	0.21	0.15	0.3	0.17	0.13	0.21	0.29	0.21	0.38	-0.04	0.17	-0.12	2.65
ENSMUSG00000021470	chr13:63834596:63834789:+@chr13:63840893:63841039:+@chr13:63841424:63841585:+	0.12	0.06	0.19	0.09	0.03	0.17	0.12	0.06	0.19	0.02	0	0.08	0.03	0.13	0.1	2.68
ENSMUSG00000034820	chr19:10531781:10531999:+@chr19:10532131:10532196:+@chr19:10532820:10532923:+	0.06	0.02	0.1	0.17	0.07	0.3	0.06	0.02	0.1	0.2	0.09	0.34	-0.11	1.16	-0.14	1.64
ENSMUSG00000035649	chr4:44929118:44929235:+@chr4:44929581:44929645:+@chr4:44931036:44932214:+	0.04	0.01	0.09	0.19	0.09	0.34	0.04	0.01	0.09	0.1	0.03	0.2	-0.15	2.57	-0.06	0.23
ENSMUSG00000017561	chr11:80056452:80056584:-@chr11:80048592:80048704:-@chr11:80046493:80047737:-	0.93	0.87	0.98	0.82	0.72	0.9	0.93	0.87	0.98	0.79	0.66	0.9	0.11	1.12	0.14	1.68
ENSMUSG00000046947	chr6:39573876:39575206:+@chr6:39576363:39576509:+@chr6:39579663:39579791:+	0.9	0.73	0.99	0.55	0.24	0.88	0.9	0.73	0.99	0.89	0.59	0.99	0.35	2.59	0.01	0.2
ENSMUSG00000029026	chr4:154062512:154062639:-@chr4:154061953:154062101:-@chr4:154061362:154061500:-	0.8	0.52	0.98	0.87	0.64	0.99	0.8	0.52	0.98	0.42	0.09	0.82	-0.07	0.36	0.38	2.42
ENSMUSG00000055407	chr7:99315689:99315902:+@chr7:99317472:99317668:+@chr7:99335985:99337137:+	0.17	0.09	0.24	0.34	0.22	0.47	0.17	0.09	0.24	0.23	0.13	0.35	-0.17	2.51	-0.06	0.24
ENSMUSG00000032498	chr9:111255628:111255716:-@chr9:111252864:111252976:-@chr9:111249220:111249313:-	0.97	0.91	0.99	0.8	0.65	0.92	0.97	0.91	0.99	0.94	0.82	1	0.17	2.66	0.03	0.09
NA	chr18:60376029:60376130:+@chr18:60382612:60382794:+@chr18:60389792:60392629:+	0.64	0.26	0.96	0.23	0.03	0.6	0.64	0.26	0.96	0.66	0.31	0.94	0.41	1.89	-0.02	0.86
NA	chr2:156547576:156547883:+@chr2:156549852:156550027:+@chr2:156550649:156551449:+	0.09	0.05	0.16	0.24	0.13	0.39	0.09	0.05	0.16	0.24	0.13	0.37	-0.15	1.28	-0.15	1.46
NA	chr3:116007449:116007882:+@chr3:116010622:116010696:+@chr3:116024007:116024434:+	0.87	0.64	0.97	0.87	0.57	0.97	0.87	0.64	0.97	0.52	0.2	0.86	0	0.25	0.35	2.49
ENSMUSG00000040455	chr4:21816882:21816938:+@chr4:21817501:21817644:+@chr4:21824417:21825077:+	0.7	0.59	0.81	0.52	0.33	0.72	0.7	0.59	0.81	0.49	0.32	0.66	0.18	0.94	0.21	1.8
ENSMUSG00000061306	chr11:120109432:120109536:-@chr11:120108467:120108490:-@chr11:120106434:120106610:-	0.03	0	0.09	0.06	0	0.2	0.03	0	0.09	0.2	0.08	0.41	-0.03	0.11	-0.17	2.63
ENSMUSG00000093930	chr13:119690462:119690513:+@chr13:119694989:119695047:+@chr13:119699664:119700121:+	0.17	0.14	0.2	0.27	0.2	0.34	0.17	0.14	0.2	0.24	0.18	0.3	-0.1	2.08	-0.07	0.65
ENSMUSG00000027620	chr2:156177336:156177385:-@chr2:156174097:156174168:-@chr2:156172828:156173022:-	0.06	0.05	0.08	0.03	0.01	0.04	0.06	0.05	0.08	0.04	0.03	0.07	0.03	2.62	0.02	0.11
ENSMUSG00000069089	chr13:100719302:100719370:-@chr13:100717572:100717682:-@chr13:100716501:100716619:-	0.99	0.97	1	0.97	0.93	0.99	0.99	0.97	1	0.94	0.9	0.97	0.02	0.06	0.05	2.67
ENSMUSG00000038022	chr6:55262719:55262835:+@chr6:55263776:55263864:+@chr6:55276554:55276655:+	0.7	0.29	0.97	0.73	0.24	0.98	0.7	0.29	0.97	0.32	0.05	0.83	-0.03	0.54	0.38	2.19
ENSMUSG00000073652	chr1:71653157:71653386:+@chr1:71654318:71654498:+@chr1:71657045:71657166:+	0.28	0	0.86	0.36	0.03	0.85	0.28	0	0.86	0.37	0.02	0.9	-0.08	1.25	-0.09	1.46
ENSMUSG00000002279	chr17:25585543:25585852:+@chr17:25603763:25603773:+@chr17:25612296:25612444:+	0.45	0.03	0.89	0.6	0.03	0.98	0.45	0.03	0.89	0.36	0.07	0.85	-0.15	1.62	0.09	1.09
ENSMUSG00000052584	chr14:76556431:76556687:-@chr14:76549982:76550054:-@chr14:76539906:76540054:-	0.37	0.04	0.79	0.73	0.32	0.98	0.37	0.04	0.79	0.39	0.07	0.75	-0.36	1.91	-0.02	0.79
ENSMUSG00000028149	chr3:139015546:139015671:-@chr3:138983722:138983868:-@chr3:138965868:138965996:-	0.59	0.49	0.68	0.73	0.58	0.85	0.59	0.49	0.68	0.77	0.63	0.91	-0.14	0.73	-0.18	1.97
NA	chr8:60982776:60983311:-@chr8:60975732:60975907:-@chr8:60941257:60941414:-	0.52	0.4	0.64	0.76	0.55	0.91	0.52	0.4	0.64	0.38	0.2	0.6	-0.24	2.15	0.14	0.55
ENSMUSG00000026121	chr1:36557360:36557557:-@chr1:36556803:36557085:-@chr1:36555932:36556080:-	0.25	0.05	0.52	0.27	0.05	0.74	0.25	0.05	0.52	0.61	0.26	0.89	-0.02	0.46	-0.36	2.23
ENSMUSG00000087259	chr11:113201291:113201838:-@chr11:113067342:113067386:-@chr11:113043906:113045160:-	0.52	0.12	0.97	0.69	0.26	0.96	0.52	0.12	0.97	0.65	0.26	0.95	-0.17	1.42	-0.13	1.27
ENSMUSG00000026856	chr2:30396153:30396252:+@chr2:30396432:30396530:+@chr2:30397468:30397557:+	0.88	0.74	0.98	0.63	0.42	0.8	0.88	0.74	0.98	0.84	0.64	0.99	0.25	2.37	0.04	0.32
ENSMUSG00000071064	chr8:79186176:79186353:+@chr8:79188154:79188181:+@chr8:79189667:79190863:+	0.5	0.09	0.83	0.35	0	0.97	0.5	0.09	0.83	0.35	0.03	0.86	0.15	1.55	0.15	1.14
ENSMUSG00000022255	chr15:34117880:34118110:+@chr15:34123668:34123766:+@chr15:34131164:34131288:+	0.95	0.92	0.97	0.87	0.81	0.92	0.95	0.92	0.97	0.89	0.83	0.93	0.08	1.71	0.06	0.96
NA	chr4:98065281:98065446:+@chr4:98081725:98081816:+@chr4:98111218:98118876:+	0.55	0.04	0.96	0.38	0.06	0.9	0.55	0.04	0.96	0.44	0.11	0.85	0.17	1.41	0.11	1.26
ENSMUSG00000024381	chr18:32424820:32424967:+@chr18:32426224:32426352:+@chr18:32431671:32431742:+	0.63	0.46	0.8	0.54	0.32	0.78	0.63	0.46	0.8	0.39	0.23	0.55	0.09	0.51	0.24	2.15
ENSMUSG00000038244	chr7:112331896:112332039:+@chr7:112345246:112345353:+@chr7:112346722:112346908:+	0.08	0.03	0.16	0.25	0.13	0.4	0.08	0.03	0.16	0.11	0.05	0.21	-0.17	2.49	-0.03	0.16
ENSMUSG00000038346	chr6:125024746:125025082:+@chr6:125025848:125025940:+@chr6:125030798:125031022:+	0.34	0.26	0.44	0.45	0.27	0.65	0.34	0.26	0.44	0.54	0.39	0.68	-0.11	0.39	-0.2	2.26
ENSMUSG00000005506	chr2:90954289:90954341:+@chr2:90987665:90987816:+@chr2:90998580:90998767:+	0.24	0.17	0.32	0.29	0.2	0.41	0.24	0.17	0.32	0.42	0.3	0.58	-0.05	0.21	-0.18	2.44
ENSMUSG00000034055	chrX:102532403:102532518:-@chrX:102531922:102531960:-@chrX:102520754:102520924:-	0.56	0.06	0.98	0.65	0.06	0.97	0.56	0.06	0.98	0.43	0.03	0.97	-0.09	1.25	0.13	1.4
ENSMUSG00000034902	chr10:81314992:81315118:+@chr10:81316692:81316960:+@chr10:81317326:81317403:+	0.5	0.28	0.76	0.56	0.18	0.91	0.5	0.28	0.76	0.2	0.06	0.53	-0.06	0.88	0.3	1.77
ENSMUSG00000023764	chr11:3186065:3186136:-@chr11:3179397:3179507:-@chr11:3177427:3177521:-	0.93	0.76	1	0.64	0.38	0.91	0.93	0.76	1	0.84	0.62	0.98	0.29	2.31	0.09	0.34
ENSMUSG00000055491	chr19:46061403:46061576:+@chr19:46062141:46062290:+@chr19:46062612:46065480:+	0.45	0.38	0.52	0.34	0.23	0.46	0.45	0.38	0.52	0.29	0.2	0.4	0.11	0.54	0.16	2.1
ENSMUSG00000074272	chr7:25476344:25476703:-@chr7:25474520:25474804:-@chr7:25471798:25472073:-	0.41	0.28	0.55	0.29	0.07	0.57	0.41	0.28	0.55	0.16	0.04	0.35	0.12	0.58	0.25	2.06
ENSMUSG00000075324	chr2:64096895:64097064:-@chr2:64027910:64027967:-@chr2:63971508:63980899:-	0.39	0.01	0.92	0.66	0.14	0.98	0.39	0.01	0.92	0.47	0.03	0.88	-0.27	1.3	-0.08	1.33
NA	chr5:99962515:99962612:-@chr5:99962134:99962204:-@chr5:99955936:99961333:-	0.02	0.01	0.03	0.05	0.03	0.08	0.02	0.01	0.03	0.04	0.02	0.06	-0.03	2.44	-0.02	0.19
ENSMUSG00000057738	chr2:30027631:30027648:+@chr2:30028644:30028706:+@chr2:30029620:30029674:+	0.54	0.13	0.95	0.48	0.06	0.89	0.54	0.13	0.95	0.39	0.02	0.93	0.06	1.22	0.15	1.41
ENSMUSG00000073856	chr7:118855775:118855961:+@chr7:118872821:118872894:+@chr7:118876242:118876371:+	0.56	0.07	0.95	0.39	0.01	0.86	0.56	0.07	0.95	0.67	0.27	0.99	0.17	1.59	-0.11	1.03
ENSMUSG00000037791	chr11:78023027:78023819:+@chr11:78024813:78024867:+@chr11:78024961:78025086:+	0.03	0.01	0.06	0.13	0.04	0.24	0.03	0.01	0.06	0.14	0.06	0.22	-0.1	0.67	-0.11	1.94
ENSMUSG00000050323	chr4:11070200:11070322:-@chr4:11066651:11066707:-@chr4:11062050:11062152:-	0.8	0.71	0.89	0.62	0.49	0.74	0.8	0.71	0.89	0.74	0.59	0.89	0.18	2.34	0.06	0.27
ENSMUSG00000034764	chr10:120369875:120370024:+@chr10:120371257:120371304:+@chr10:120382065:120382836:+	0.48	0.07	0.93	0.48	0.01	0.92	0.48	0.07	0.93	0.54	0.06	0.91	0	1.54	-0.06	1.06
ENSMUSG00000025968	chr1:63176428:63176822:-@chr1:63172154:63172257:-@chr1:63170849:63170914:-	0.53	0.4	0.65	0.74	0.59	0.88	0.53	0.4	0.65	0.65	0.49	0.77	-0.21	2.03	-0.12	0.57
ENSMUSG00000026970	chr2:60762053:60762146:-@chr2:60759759:60759806:-@chr2:60758804:60758854:-	0.32	0.21	0.43	0.53	0.37	0.67	0.32	0.21	0.43	0.27	0.18	0.38	-0.21	2.34	0.05	0.26
ENSMUSG00000025161	chr11:120949067:120949150:+@chr11:120954174:120954268:+@chr11:120955226:120955469:+	0.84	0.78	0.89	0.92	0.86	0.97	0.84	0.78	0.89	0.94	0.88	0.99	-0.08	0.87	-0.1	1.72
ENSMUSG00000028689	chr4:116708571:116708656:+@chr4:116709262:116709273:+@chr4:116709438:116709619:+	0.38	0.02	0.9	0.4	0.04	0.94	0.38	0.02	0.9	0.42	0.04	0.94	-0.02	1.07	-0.04	1.52
ENSMUSG00000037697	chr14:45601565:45601756:-@chr14:45599102:45599185:-@chr14:45593174:45595664:-	0.92	0.81	0.99	0.73	0.52	0.9	0.92	0.81	0.99	0.72	0.51	0.89	0.19	1.03	0.2	1.56
ENSMUSG00000023048	chr15:102459170:102459255:+@chr15:102459464:102459581:+@chr15:102460108:102460146:+	0.64	0.49	0.78	0.84	0.68	0.94	0.64	0.49	0.78	0.75	0.57	0.88	-0.2	2.08	-0.11	0.5
ENSMUSG00000015290	chrX:74368153:74368258:-@chrX:74367701:74368010:-@chrX:74365718:74367586:-	0.99	0.97	1	0.92	0.85	0.97	0.99	0.97	1	0.92	0.84	0.97	0.07	1.1	0.07	1.47
ENSMUSG00000034269	chr6:113104935:113105121:+@chr6:113105917:113106141:+@chr6:113109885:113109990:+	0.68	0.6	0.77	0.55	0.43	0.69	0.68	0.6	0.77	0.52	0.41	0.64	0.13	0.77	0.16	1.8
ENSMUSG00000046688	chr3:127789913:127790171:+@chr3:127791473:127791529:+@chr3:127796569:127798389:+	0.37	0.06	0.86	0.4	0.02	0.97	0.37	0.06	0.86	0.69	0.29	0.97	-0.03	0.86	-0.32	1.71
ENSMUSG00000060441	chr7:104276606:104276836:-@chr7:104274773:104274795:-@chr7:104266469:104266566:-	0.38	0.03	0.91	0.7	0.35	0.98	0.38	0.03	0.91	0.36	0.02	0.87	-0.32	1.71	0.02	0.85
ENSMUSG00000025006	chr19:40349899:40350013:-@chr19:40344356:40344439:-@chr19:40336986:40337035:-	0.06	0.02	0.12	0.1	0.02	0.26	0.06	0.02	0.12	0.23	0.1	0.39	-0.04	0.15	-0.17	2.41
ENSMUSG00000028256	chr3:145126093:145126225:+@chr3:145127023:145127151:+@chr3:145127831:145127890:+	0.64	0.51	0.78	0.82	0.67	0.92	0.64	0.51	0.78	0.83	0.66	0.95	-0.18	1.25	-0.19	1.3
ENSMUSG00000025006	chr19:40344356:40344439:-@chr19:40340685:40340750:-@chr19:40340045:40340146:-	0.66	0.15	0.97	0.35	0.02	0.81	0.66	0.15	0.97	0.7	0.26	0.95	0.31	1.86	-0.04	0.69
ENSMUSG00000030380	chr7:13051491:13051611:-@chr7:13045733:13045832:-@chr7:13042303:13044700:-	0.38	0.04	0.85	0.4	0.02	0.88	0.38	0.04	0.85	0.55	0.01	0.98	-0.02	1.04	-0.17	1.5
ENSMUSG00000012296	chr17:46282960:46283026:-@chr17:46282346:46282439:-@chr17:46264883:46264978:-	0.97	0.89	1	0.79	0.61	0.91	0.97	0.89	1	0.84	0.65	0.96	0.18	2.09	0.13	0.45
ENSMUSG00000040940	chr7:24917895:24918000:+@chr7:24918523:24918535:+@chr7:24919184:24919351:+	0.31	0.02	0.83	0.39	0.03	0.9	0.31	0.02	0.83	0.44	0.04	0.92	-0.08	1.3	-0.13	1.23
ENSMUSG00000009563	chr2:32757234:32757450:+@chr2:32758671:32758936:+@chr2:32759527:32759702:+	0.97	0.9	1	0.86	0.73	0.96	0.97	0.9	1	0.82	0.7	0.93	0.11	1.21	0.15	1.32
ENSMUSG00000048731	chr17:27025337:27025459:+@chr17:27028833:27029946:+@chr17:27030676:27030800:+	0.66	0.41	0.97	0.35	0.11	0.69	0.66	0.41	0.97	0.68	0.39	0.92	0.31	1.84	-0.02	0.69
ENSMUSG00000028211	chr4:11165090:11165447:+@chr4:11167897:11167934:+@chr4:11169710:11174377:+	0.43	0.34	0.54	0.42	0.33	0.51	0.43	0.34	0.54	0.26	0.16	0.34	0.01	0.19	0.17	2.34
ENSMUSG00000055839	chr17:23827468:23827573:-@chr17:23826586:23826666:-@chr17:23824740:23824979:-	0	0	0.01	0.01	0.01	0.02	0	0	0.01	0.02	0.01	0.02	-0.01	0	-0.02	2.52
ENSMUSG00000084925	chr14:20565011:20565047:+@chr14:20566948:20567049:+@chr14:20570342:20570680:+	0.53	0.02	0.88	0.47	0.04	0.99	0.53	0.02	0.88	0.3	0.01	0.93	0.06	0.8	0.23	1.72
ENSMUSG00000054874	chr19:5666509:5666739:-@chr19:5666150:5666424:-@chr19:5665708:5665841:-	0.94	0.82	0.99	0.78	0.62	0.93	0.94	0.82	0.99	0.73	0.54	0.91	0.16	1.03	0.21	1.49
ENSMUSG00000021669	chr13:96616457:96616549:+@chr13:96616994:96617071:+@chr13:96624695:96624790:+	0.37	0.3	0.45	0.48	0.36	0.62	0.37	0.3	0.45	0.53	0.42	0.65	-0.11	0.51	-0.16	2.01
ENSMUSG00000039103	chr3:152255285:152255365:-@chr3:152253612:152253803:-@chr3:152253051:152253129:-	0.15	0.09	0.23	0.22	0.12	0.36	0.15	0.09	0.23	0.33	0.2	0.5	-0.07	0.24	-0.18	2.28
ENSMUSG00000041180	chr19:36599596:36599719:+@chr19:36601470:36601528:+@chr19:36604250:36604357:+	0.4	0.08	0.78	0.51	0.02	0.98	0.4	0.08	0.78	0.58	0.1	0.97	-0.11	1.5	-0.18	1.01
ENSMUSG00000032479	chr9:110068693:110068985:+@chr9:110072613:110072705:+@chr9:110078003:110078084:+	0.51	0.43	0.58	0.57	0.47	0.67	0.51	0.43	0.58	0.66	0.56	0.75	-0.06	0.26	-0.15	2.25
ENSMUSG00000061207	chr17:34824751:34824848:-@chr17:34824582:34824661:-@chr17:34823993:34824324:-	0.27	0.11	0.44	0.44	0.25	0.66	0.27	0.11	0.44	0.49	0.28	0.69	-0.17	0.8	-0.22	1.7
ENSMUSG00000053091	chr7:66696176:66696306:+@chr7:66705802:66705854:+@chr7:66707025:66707124:+	0.43	0.02	0.97	0.39	0.06	0.89	0.43	0.02	0.97	0.74	0.27	1	0.04	0.96	-0.31	1.54
ENSMUSG00000021546	chr13:58399156:58399212:-@chr13:58397753:58397796:-@chr13:58396827:58396899:-	0.97	0.96	0.98	0.95	0.92	0.96	0.97	0.96	0.98	0.94	0.92	0.96	0.02	0.59	0.03	1.91
ENSMUSG00000073968	chr7:102680137:102680397:-@chr7:102679674:102679696:-@chr7:102679036:102679136:-	0.7	0.24	0.99	0.42	0.06	0.82	0.7	0.24	0.99	0.68	0.3	0.98	0.28	1.61	0.02	0.89
ENSMUSG00000001247	chr7:30965969:30966088:-@chr7:30962811:30962867:-@chr7:30962098:30962244:-	0.33	0.23	0.47	0.46	0.29	0.64	0.33	0.23	0.47	0.58	0.39	0.78	-0.13	0.5	-0.25	1.99
ENSMUSG00000017307	chr2:164804690:164804881:-@chr2:164802997:164803133:-@chr2:164799720:164799945:-	0.86	0.72	0.97	0.61	0.36	0.82	0.86	0.72	0.97	0.79	0.52	0.97	0.25	2.16	0.07	0.33
ENSMUSG00000005936	chr17:28953216:28953343:+@chr17:28957879:28958057:+@chr17:28961414:28961687:+	0.32	0.24	0.42	0.52	0.37	0.67	0.32	0.24	0.42	0.47	0.33	0.67	-0.2	1.71	-0.15	0.77
ENSMUSG00000021843	chr14:47724878:47724970:+@chr14:47725929:47726000:+@chr14:47726226:47726309:+	0.59	0.5	0.68	0.74	0.63	0.84	0.59	0.5	0.68	0.73	0.6	0.84	-0.15	1.38	-0.14	1.1
ENSMUSG00000090626	chr9:72478340:72478422:-@chr9:72477737:72477910:-@chr9:72473658:72473792:-	0.92	0.79	0.99	0.63	0.42	0.87	0.92	0.79	0.99	0.9	0.74	0.99	0.29	2.29	0.02	0.19
NA	chr1:105659293:105659366:-@chr1:105658887:105659006:-@chr1:105657602:105657850:-	0.62	0.4	0.84	0.31	0.09	0.68	0.62	0.4	0.84	0.74	0.43	0.95	0.31	1.8	-0.12	0.67
NA	chr9:124312560:124312694:-@chr9:124304656:124304718:-@chr9:124295358:124295484:-	0.44	0.01	0.97	0.62	0.25	0.89	0.44	0.01	0.97	0.6	0.17	0.93	-0.18	1.14	-0.16	1.33
ENSMUSG00000027200	chr2:124660283:124660344:+@chr2:124662204:124662371:+@chr2:124664021:124667770:+	0.45	0.12	0.8	0.36	0.02	0.92	0.45	0.12	0.8	0.73	0.37	0.96	0.09	1.08	-0.28	1.39
ENSMUSG00000030166	chr6:119913002:119913103:+@chr6:119913899:119913992:+@chr6:119914170:119914237:+	0.89	0.72	0.99	0.57	0.28	0.86	0.89	0.72	0.99	0.91	0.72	1	0.32	2.23	-0.02	0.24
ENSMUSG00000044288	chr4:33924632:33925158:+@chr4:33926609:33926694:+@chr4:33943552:33948831:+	0.67	0.19	0.98	0.58	0.21	0.96	0.67	0.19	0.98	0.37	0.03	0.85	0.09	1.03	0.3	1.44
ENSMUSG00000041654	chr11:113649942:113650071:-@chr11:113591782:113591932:-@chr11:113562006:113562124:-	0.32	0.03	0.93	0.45	0.06	0.93	0.32	0.03	0.93	0.58	0.26	0.91	-0.13	1.31	-0.26	1.15
ENSMUSG00000026979	chr2:24386359:24386519:+@chr2:24386633:24386709:+@chr2:24394022:24395040:+	0.5	0.2	0.82	0.42	0.04	0.89	0.5	0.2	0.82	0.73	0.18	0.99	0.08	1.28	-0.23	1.18
ENSMUSG00000028785	chr4:129121570:129121740:-@chr4:129120150:129120200:-@chr4:129118364:129118762:-	0.31	0.02	0.93	0.33	0.02	0.91	0.31	0.02	0.93	0.44	0.04	0.96	-0.02	1.2	-0.13	1.26
ENSMUSG00000040940	chr7:24917895:24918000:+@chr7:24918520:24918531:+@chr7:24919184:24919351:+	0.41	0.04	0.87	0.31	0.02	0.78	0.41	0.04	0.87	0.39	0.02	0.9	0.1	1.06	0.02	1.4
ENSMUSG00000033088	chr15:78976467:78976544:+@chr15:78978614:78978751:+@chr15:78987892:78987948:+	0.53	0.05	0.95	0.37	0.08	0.76	0.53	0.05	0.95	0.48	0.17	0.83	0.16	0.79	0.05	1.67
ENSMUSG00000037300	chr8:124709903:124709973:-@chr8:124699656:124699721:-@chr8:124695636:124695752:-	0.27	0.15	0.41	0.46	0.29	0.64	0.27	0.15	0.41	0.46	0.3	0.65	-0.19	1.23	-0.19	1.22
ENSMUSG00000036330	chr8:69088981:69089222:-@chr8:69077189:69077263:-@chr8:69075034:69075305:-	0.52	0.02	0.95	0.49	0.05	0.91	0.52	0.02	0.95	0.57	0.09	0.95	0.03	0.88	-0.05	1.57
ENSMUSG00000036916	chrX:48547265:48547327:-@chrX:48543585:48543703:-@chrX:48543405:48543441:-	0.63	0.42	0.84	0.35	0.13	0.71	0.63	0.42	0.84	0.82	0.49	0.99	0.28	1.58	-0.19	0.87
ENSMUSG00000009575	chr15:103215268:103215352:-@chr15:103215022:103215125:-@chr15:103213072:103213254:-	0.26	0.19	0.33	0.12	0.04	0.22	0.26	0.19	0.33	0.16	0.09	0.28	0.14	1.94	0.1	0.51
ENSMUSG00000018387	chr11:53464275:53464330:+@chr11:53465120:53465308:+@chr11:53465496:53466044:+	0.63	0.25	0.9	0.25	0.07	0.53	0.63	0.25	0.9	0.73	0.45	0.91	0.38	1.8	-0.1	0.65
ENSMUSG00000052752	chr17:24516505:24516599:-@chr17:24514713:24514829:-@chr17:24514125:24514217:-	0.9	0.84	0.96	0.75	0.64	0.87	0.9	0.84	0.96	0.77	0.61	0.9	0.15	1.69	0.13	0.76
ENSMUSG00000015134	chr7:66411502:66411630:-@chr7:66409166:66409279:-@chr7:66407801:66407903:-	0.45	0.09	0.88	0.72	0.26	0.99	0.45	0.09	0.88	0.56	0.15	0.98	-0.27	1.33	-0.11	1.11
ENSMUSG00000023079	chr5:134382781:134382830:-@chr5:134382530:134382586:-@chr5:134379937:134380020:-	0.77	0.66	0.87	0.92	0.82	0.99	0.77	0.66	0.87	0.76	0.59	0.89	-0.15	2.2	0.01	0.24
NA	chr2:60125463:60125810:-@chr2:60076861:60076911:-@chr2:60006043:60006189:-	0.44	0.16	0.79	0.82	0.5	1	0.44	0.16	0.79	0.45	0.14	0.78	-0.38	1.85	-0.01	0.59
ENSMUSG00000049580	chr7:98360021:98360079:-@chr7:98359358:98359467:-@chr7:98350668:98353130:-	0.25	0.11	0.45	0.4	0.21	0.67	0.25	0.11	0.45	0.05	0	0.17	-0.15	0.61	0.2	1.82
NA	chr7:127024444:127024615:-@chr7:127023477:127023706:-@chr7:127022137:127023168:-	0.15	0.12	0.17	0.1	0.07	0.13	0.15	0.12	0.17	0.09	0.07	0.12	0.05	1.12	0.06	1.31
NA	chr11:120150980:120151351:-@chr11:120147721:120147838:-@chr11:120141600:120141645:-	0.72	0.59	0.85	0.8	0.61	0.93	0.72	0.59	0.85	0.91	0.79	0.98	-0.08	0.36	-0.19	2.06
NA	chr1:105659293:105659366:-@chr1:105658916:105659006:-@chr1:105657602:105657850:-	0.39	0.17	0.73	0.2	0.01	0.67	0.39	0.17	0.73	0.67	0.37	0.92	0.19	0.98	-0.28	1.44
ENSMUSG00000033257	chr1:74672844:74673010:+@chr1:74678898:74678931:+@chr1:74680354:74680463:+	0.47	0.24	0.78	0.66	0.38	0.93	0.47	0.24	0.78	0.19	0.05	0.44	-0.19	0.86	0.28	1.56
ENSMUSG00000038271	chr6:125151385:125151525:+@chr6:125152444:125152771:+@chr6:125153042:125153162:+	0.5	0.23	0.94	0.2	0.05	0.44	0.5	0.23	0.94	0.51	0.21	0.89	0.3	1.68	-0.01	0.74
ENSMUSG00000035601	chr4:45300417:45300627:+@chr4:45301225:45301344:+@chr4:45304264:45304388:+	0.35	0.16	0.61	0.7	0.34	0.95	0.35	0.16	0.61	0.39	0.12	0.78	-0.35	1.87	-0.04	0.54
ENSMUSG00000040929	chr19:28010972:28011166:-@chr19:27982854:27982946:-@chr19:27923208:27923266:-	0.39	0.07	0.76	0.56	0.05	0.95	0.39	0.07	0.76	0.5	0.07	0.99	-0.17	1.5	-0.11	0.91
ENSMUSG00000040481	chr11:107047000:107047343:-@chr11:107044492:107044665:-@chr11:107043633:107043825:-	0.48	0.42	0.55	0.37	0.28	0.47	0.48	0.42	0.55	0.33	0.25	0.44	0.11	0.83	0.15	1.58
ENSMUSG00000030145	chr6:118453846:118453887:-@chr6:118451314:118451362:-@chr6:118433305:118433431:-	0.35	0.03	0.82	0.46	0.01	0.96	0.35	0.03	0.82	0.49	0.11	0.92	-0.11	1.29	-0.14	1.11
ENSMUSG00000032436	chr9:114763219:114763392:-@chr9:114761907:114762005:-@chr9:114758805:114758886:-	0.96	0.9	0.99	0.83	0.74	0.92	0.96	0.9	0.99	0.89	0.8	0.95	0.13	2.18	0.07	0.22
ENSMUSG00000058806	chr10:61862628:61862771:-@chr10:61860440:61860484:-@chr10:61857588:61857629:-	0.48	0.08	0.98	0.7	0.24	0.98	0.48	0.08	0.98	0.6	0.12	0.96	-0.22	1.23	-0.12	1.17
ENSMUSG00000042323	chr14:31054158:31054255:+@chr14:31056236:31056280:+@chr14:31061469:31061745:+	0.27	0.17	0.4	0.49	0.32	0.67	0.27	0.17	0.4	0.34	0.17	0.55	-0.22	2.07	-0.07	0.33
ENSMUSG00000031864	chr8:68822157:68822250:+@chr8:68824190:68824267:+@chr8:68827277:68827644:+	0.09	0.05	0.13	0.22	0.12	0.33	0.09	0.05	0.13	0.16	0.08	0.25	-0.13	2.07	-0.07	0.33
ENSMUSG00000041180	chr19:36599596:36599719:+@chr19:36601429:36601528:+@chr19:36604250:36604357:+	0.53	0.22	0.85	0.49	0.04	0.98	0.53	0.22	0.85	0.6	0.14	0.94	0.04	1.25	-0.07	1.15
ENSMUSG00000027522	chr2:174077051:174077138:+@chr2:174084646:174084657:+@chr2:174090621:174090728:+	0.53	0.38	0.68	0.38	0.19	0.58	0.53	0.38	0.68	0.29	0.14	0.46	0.15	0.6	0.24	1.79
NA	chr14:122913030:122913292:+@chr14:122923622:122923677:+@chr14:122926130:122929442:+	0.44	0.06	0.97	0.47	0.08	0.91	0.44	0.06	0.97	0.76	0.41	0.96	-0.03	1.03	-0.32	1.35
ENSMUSG00000039844	chr2:29719593:29719850:+@chr2:29720643:29720738:+@chr2:29722224:29722309:+	0.37	0.01	0.91	0.57	0.13	0.95	0.37	0.01	0.91	0.39	0.01	0.78	-0.2	1.29	-0.02	1.09
ENSMUSG00000041115	chrX:152178964:152179090:+@chrX:152180997:152181092:+@chrX:152202908:152203169:+	0.55	0.11	0.99	0.26	0.01	0.69	0.55	0.11	0.99	0.54	0.01	0.99	0.29	1.21	0.01	1.17
ENSMUSG00000032878	chr11:28396046:28396165:-@chr11:28392854:28392952:-@chr11:28385692:28388948:-	0.38	0.04	0.9	0.49	0.05	0.99	0.38	0.04	0.9	0.34	0.02	0.83	-0.11	1.37	0.04	1
NA	chr7:24237083:24237598:-@chr7:24236618:24236675:-@chr7:24234351:24234477:-	0.63	0.08	0.99	0.63	0.26	0.94	0.63	0.08	0.99	0.7	0.31	0.93	0	1.06	-0.07	1.31
ENSMUSG00000037336	chr12:4874271:4874359:-@chr12:4873135:4873285:-@chr12:4871376:4871501:-	0.5	0.08	0.87	0.46	0.07	1	0.5	0.08	0.87	0.59	0.16	0.94	0.04	1.53	-0.09	0.84
NA	chr18:33794892:33795124:+@chr18:33795383:33795445:+@chr18:33795853:33795989:+	1	0.99	1	0.95	0.91	0.98	1	0.99	1	0.95	0.89	0.99	0.05	1.69	0.05	0.68
ENSMUSG00000037348	chr4:134500600:134500683:+@chr4:134506681:134506717:+@chr4:134506803:134508810:+	0.53	0.08	0.93	0.46	0.07	0.87	0.53	0.08	0.93	0.45	0.08	0.86	0.07	0.71	0.08	1.66
ENSMUSG00000005150	chr8:85079581:85079707:-@chr8:85076024:85076284:-@chr8:85075823:85075937:-	0.42	0.3	0.55	0.25	0.16	0.36	0.42	0.3	0.55	0.27	0.17	0.42	0.17	1.57	0.15	0.8
ENSMUSG00000020100	chr10:60723764:60723990:-@chr10:60720861:60721023:-@chr10:60712072:60716490:-	0.59	0.39	0.8	0.44	0.2	0.75	0.59	0.39	0.8	0.36	0.16	0.66	0.15	0.77	0.23	1.6
ENSMUSG00000028456	chr4:43058984:43059285:+@chr4:43115103:43115160:+@chr4:43165744:43165978:+	0.6	0.25	0.92	0.54	0.09	0.94	0.6	0.25	0.92	0.28	0.02	0.77	0.06	0.76	0.32	1.61
ENSMUSG00000067786	chr2:157560110:157560260:+@chr2:157561213:157561239:+@chr2:157561542:157562519:+	0.29	0.04	0.63	0.25	0.02	0.72	0.29	0.04	0.63	0.64	0.18	0.95	0.04	0.74	-0.35	1.62
ENSMUSG00000076439	chr17:37014750:37014770:-@chr17:37012336:37012452:-@chr17:37012063:37012083:-	0.53	0.13	0.94	0.51	0.03	0.99	0.53	0.13	0.94	0.54	0.14	0.94	0.02	1.37	-0.01	0.99
ENSMUSG00000032997	chr1:75478792:75479471:-@chr1:75478270:75478412:-@chr1:75477245:75477540:-	0.31	0.14	0.54	0.18	0.04	0.54	0.31	0.14	0.54	0.09	0.01	0.32	0.13	0.76	0.22	1.6
ENSMUSG00000080316	chr17:17837509:17837586:+@chr17:17837670:17837769:+@chr17:17838087:17838243:+	0.37	0.08	0.74	0.42	0.07	0.77	0.37	0.08	0.74	0.65	0.33	0.91	-0.05	0.88	-0.28	1.48
ENSMUSG00000003452	chr6:149518906:149519113:+@chr6:149550350:149550425:+@chr6:149556644:149558857:+	0.37	0.06	0.76	0.58	0.06	0.98	0.37	0.06	0.76	0.44	0.05	0.87	-0.21	1.52	-0.07	0.84
ENSMUSG00000086968	chr3:107895643:107896213:-@chr3:107894861:107894992:-@chr3:107894051:107894228:-	0.28	0.01	0.94	0.51	0.15	0.89	0.28	0.01	0.94	0.25	0.01	0.79	-0.23	1.68	0.03	0.68
ENSMUSG00000008489	chr4:91260761:91260986:-@chr4:91254141:91254179:-@chr4:91250767:91253567:-	0.45	0.24	0.73	0.53	0.1	0.97	0.45	0.24	0.73	0.72	0.36	0.99	-0.08	0.93	-0.27	1.42
NA	chr15:103033967:103035161:+@chr15:103035267:103035315:+@chr15:103035637:103036852:+	0.3	0.03	0.81	0.25	0.03	0.64	0.3	0.03	0.81	0.67	0.23	0.97	0.05	0.55	-0.37	1.8
ENSMUSG00000074570	chr2:172426636:172427925:+@chr2:172429642:172429719:+@chr2:172432233:172433757:+	0.5	0.28	0.7	0.78	0.48	0.95	0.5	0.28	0.7	0.54	0.12	0.87	-0.28	1.44	-0.04	0.91
ENSMUSG00000001105	chr11:78536436:78536576:+@chr11:78538510:78538738:+@chr11:78538834:78538962:+	0.74	0.66	0.82	0.58	0.48	0.69	0.74	0.66	0.82	0.64	0.52	0.76	0.16	1.93	0.1	0.42
ENSMUSG00000037992	chr11:98937696:98937879:+@chr11:98947571:98947725:+@chr11:98950245:98950795:+	0.03	0	0.1	0.31	0.07	0.69	0.03	0	0.1	0.12	0.01	0.31	-0.28	2.09	-0.09	0.25
ENSMUSG00000028373	chr4:66185124:66185508:-@chr4:66119057:66119212:-@chr4:66059130:66059237:-	0.48	0.05	0.91	0.3	0.03	0.78	0.48	0.05	0.91	0.35	0.05	0.79	0.18	1.48	0.13	0.86
ENSMUSG00000026150	chr1:82735419:82735507:+@chr1:82741818:82741976:+@chr1:82745524:82745556:+	0.49	0.3	0.72	0.26	0.14	0.48	0.49	0.3	0.72	0.35	0.18	0.67	0.23	1.52	0.14	0.82
ENSMUSG00000032386	chr9:65908439:65908794:-@chr9:65896697:65896930:-@chr9:65894915:65895473:-	0.37	0.08	0.73	0.48	0.11	0.84	0.37	0.08	0.73	0.64	0.19	0.96	-0.11	0.8	-0.27	1.53
ENSMUSG00000026098	chr1:53296732:53297015:-@chr1:53290379:53290423:-@chr1:53281941:53282092:-	0.53	0.09	0.9	0.48	0.06	0.95	0.53	0.09	0.9	0.6	0.22	0.98	0.05	1.28	-0.07	1.05
ENSMUSG00000038056	chr5:25372766:25373469:-@chr5:25366077:25366196:-@chr5:25363446:25363562:-	0.74	0.49	0.99	0.42	0.18	0.75	0.74	0.49	0.99	0.88	0.68	1	0.32	1.68	-0.14	0.65
ENSMUSG00000007476,ENSMUSG00000079484	chr2:30277003:30277058:+@chr2:30277148:30277210:+@chr2:30277623:30277644:+	0.68	0.19	0.99	0.62	0.17	0.93	0.68	0.19	0.99	0.44	0.09	0.86	0.06	1	0.24	1.32
ENSMUSG00000055320	chr7:112841888:112841950:+@chr7:112842040:112842102:+@chr7:112856053:112856064:+	0.51	0.07	0.94	0.5	0.05	0.97	0.51	0.07	0.94	0.5	0.1	0.9	0.01	1.15	0.01	1.17
ENSMUSG00000023050	chr15:102509290:102509378:-@chr15:102508328:102508463:-@chr15:102505090:102505568:-	0.22	0.08	0.45	0.34	0.11	0.69	0.22	0.08	0.45	0.47	0.24	0.71	-0.12	0.45	-0.25	1.86
NA	chr11:54962833:54962940:-@chr11:54956021:54956178:-@chr11:54940711:54940882:-	0.57	0.38	0.77	0.51	0.26	0.84	0.57	0.38	0.77	0.84	0.57	0.99	0.06	0.58	-0.27	1.73
ENSMUSG00000032254	chr9:61935380:61935550:-@chr9:61933229:61933270:-@chr9:61932075:61932187:-	0.1	0.07	0.15	0.15	0.08	0.23	0.1	0.07	0.15	0.21	0.14	0.28	-0.05	0.17	-0.11	2.14
ENSMUSG00000064115	chr16:67620171:67620908:-@chr16:66953274:66953300:-@chr16:66882733:66882882:-	0.46	0.09	0.96	0.52	0.06	0.9	0.46	0.09	0.96	0.52	0.04	0.96	-0.06	1.3	-0.06	1.01
NA	chr12:41485571:41486057:-@chr12:41458967:41458995:-@chr12:41451668:41454671:-	0.45	0.02	0.93	0.45	0.04	0.87	0.45	0.02	0.93	0.41	0	0.83	0	0.88	0.04	1.43
ENSMUSG00000028252	chr4:21746656:21746774:+@chr4:21747483:21747576:+@chr4:21748137:21750546:+	0.46	0.38	0.55	0.63	0.51	0.75	0.46	0.38	0.55	0.48	0.36	0.59	-0.17	2.11	-0.02	0.19
ENSMUSG00000000530	chr15:101128927:101129063:+@chr15:101129965:101130051:+@chr15:101134676:101134743:+	0.46	0.04	0.93	0.53	0.08	0.91	0.46	0.04	0.93	0.39	0.02	0.92	-0.07	1.22	0.07	1.08
ENSMUSG00000043909	chr2:121235573:121236869:-@chr2:121228588:121228707:-@chr2:121227645:121227848:-	0.91	0.83	0.99	0.71	0.55	0.86	0.91	0.83	0.99	0.95	0.85	1	0.2	2.06	-0.04	0.24
ENSMUSG00000045594	chr9:114401095:114401269:+@chr9:114416961:114417130:+@chr9:114420353:114420503:+	0.89	0.82	0.96	0.98	0.94	1	0.89	0.82	0.96	0.96	0.9	0.99	-0.09	1.9	-0.07	0.39
ENSMUSG00000069833	chr19:9037159:9037258:+@chr19:9045625:9045716:+@chr19:9076576:9076919:+	0.28	0.11	0.58	0.56	0.25	0.86	0.28	0.11	0.58	0.12	0.01	0.54	-0.28	1.17	0.16	1.12
ENSMUSG00000053367	chr7:6274347:6274373:+@chr7:6277420:6277541:+@chr7:6279414:6279451:+	0.51	0.01	0.94	0.51	0.07	0.94	0.51	0.01	0.94	0.53	0.09	0.91	0	0.71	-0.02	1.58
ENSMUSG00000024926	chr19:5609236:5609372:-@chr19:5608802:5608957:-@chr19:5608638:5608712:-	0.22	0.16	0.29	0.1	0.04	0.18	0.22	0.16	0.29	0.14	0.06	0.25	0.12	1.93	0.08	0.36
ENSMUSG00000025592	chrX:113298256:113298935:+@chrX:113452458:113452496:+@chrX:113556248:113556360:+	0.57	0.09	0.98	0.45	0.02	0.98	0.57	0.09	0.98	0.65	0.19	0.94	0.12	1.17	-0.08	1.11
ENSMUSG00000028037	chr3:151739320:151739491:-@chr3:151738223:151738323:-@chr3:151730923:151732553:-	0.89	0.76	0.97	0.62	0.37	0.85	0.89	0.76	0.97	0.84	0.63	0.96	0.27	2.04	0.05	0.24
ENSMUSG00000039048	chr9:35209038:35209156:-@chr9:35207892:35207982:-@chr9:35207479:35207580:-	0.84	0.64	0.97	0.57	0.35	0.81	0.84	0.64	0.97	0.86	0.57	0.99	0.27	1.94	-0.02	0.34
ENSMUSG00000075256	chr2:79392943:79393185:-@chr2:79354922:79355064:-@chr2:79343217:79343291:-	0.64	0.24	0.92	0.66	0.16	0.96	0.64	0.24	0.92	0.52	0.12	0.97	-0.02	0.64	0.12	1.63
ENSMUSG00000034164	chr11:5116880:5116924:-@chr11:5109544:5109634:-@chr11:5106266:5106969:-	0.43	0.05	0.85	0.28	0	0.75	0.43	0.05	0.85	0.44	0.08	0.95	0.15	1.28	-0.01	0.98
ENSMUSG00000061451	chr19:5085298:5085487:-@chr19:5072669:5072770:-@chr19:5071655:5071894:-	0.64	0.16	0.94	0.42	0.06	0.93	0.64	0.16	0.94	0.61	0.1	0.97	0.22	1.55	0.03	0.71
ENSMUSG00000064177	chr6:113719322:113719454:-@chr6:113719110:113719226:-@chr6:113717053:113717161:-	0.64	0.23	0.93	0.56	0.14	0.89	0.64	0.23	0.93	0.34	0.02	0.7	0.08	0.78	0.3	1.48
ENSMUSG00000023008	chr15:99329280:99329432:-@chr15:99329094:99329176:-@chr15:99328058:99328166:-	0.06	0.01	0.15	0.12	0.02	0.33	0.06	0.01	0.15	0.37	0.1	0.79	-0.06	0.17	-0.31	2.08
ENSMUSG00000025912	chr1:9672212:9672316:-@chr1:9671579:9671758:-@chr1:9668835:9670012:-	0.53	0.41	0.66	0.75	0.59	0.89	0.53	0.41	0.66	0.59	0.41	0.77	-0.22	1.9	-0.06	0.35
ENSMUSG00000068373	chr2:104409929:104410334:-@chr2:104258164:104258508:-@chr2:104254956:104255570:-	0.58	0.19	0.93	0.62	0.18	0.98	0.58	0.19	0.93	0.63	0.22	0.97	-0.04	1.58	-0.05	0.67
ENSMUSG00000087177	chr10:39681473:39681549:-@chr10:39640380:39640511:-@chr10:39632950:39633016:-	0.57	0.17	0.92	0.45	0.12	0.82	0.57	0.17	0.92	0.72	0.35	0.94	0.12	1.32	-0.15	0.93
ENSMUSG00000048078	chr7:96553478:96553747:+@chr7:96643999:96644208:+@chr7:96694770:96695025:+	0.62	0.19	0.97	0.35	0.06	0.8	0.62	0.19	0.97	0.77	0.41	0.98	0.27	1.48	-0.15	0.77
ENSMUSG00000055204	chr5:90285041:90285143:-@chr5:90282851:90283603:-@chr5:90278243:90278391:-	0.28	0.23	0.33	0.22	0.16	0.29	0.28	0.23	0.33	0.19	0.15	0.24	0.06	0.32	0.09	1.93
ENSMUSG00000000530	chr15:101128927:101129063:+@chr15:101131343:101131471:+@chr15:101134676:101134743:+	0.48	0.03	0.96	0.36	0	0.96	0.48	0.03	0.96	0.37	0.02	0.92	0.12	1.27	0.11	0.98
ENSMUSG00000028931	chr4:152477401:152477549:-@chr4:152473723:152473861:-@chr4:152435805:152435937:-	0.55	0.12	0.98	0.22	0.01	0.7	0.55	0.12	0.98	0.54	0.02	0.96	0.33	1.43	0.01	0.82
ENSMUSG00000025498	chr7:141265075:141265291:-@chr7:141264493:141264559:-@chr7:141263659:141264048:-	0.22	0.05	0.42	0.62	0.24	0.89	0.22	0.05	0.42	0.11	0.01	0.39	-0.4	1.75	0.11	0.49
ENSMUSG00000024163	chr17:24909150:24909161:-@chr17:24908411:24908428:-@chr17:24907329:24907386:-	0.52	0.08	0.94	0.56	0.13	0.97	0.52	0.08	0.94	0.5	0.15	0.87	-0.04	1.1	0.02	1.14
ENSMUSG00000056917	chr19:5662588:5662841:-@chr19:5661596:5661626:-@chr19:5660314:5661111:-	0.54	0.09	0.96	0.4	0.03	0.86	0.54	0.09	0.96	0.57	0.2	0.87	0.14	1.11	-0.03	1.13
ENSMUSG00000062232	chr3:79169739:79169756:-@chr3:79130698:79130716:-@chr3:79112171:79112302:-	0.43	0.03	0.96	0.23	0.01	0.68	0.43	0.03	0.96	0.45	0.04	0.97	0.2	1.16	-0.02	1.08
ENSMUSG00000022948	chr16:93603566:93603815:-@chr16:93603137:93603196:-@chr16:93601638:93601798:-	0.53	0.13	0.97	0.47	0.12	0.85	0.53	0.13	0.97	0.28	0.02	0.81	0.06	0.88	0.25	1.36
ENSMUSG00000017664	chr2:165282081:165282144:-@chr2:165281308:165281380:-@chr2:165280786:165280891:-	0.61	0.38	0.87	0.86	0.6	0.97	0.61	0.38	0.87	0.71	0.41	0.96	-0.25	1.66	-0.1	0.57
ENSMUSG00000054400	chr8:104257285:104257443:+@chr8:104261474:104261569:+@chr8:104263271:104263443:+	0.76	0.61	0.91	0.93	0.78	1	0.76	0.61	0.91	0.93	0.81	1	-0.17	1.27	-0.17	0.96
ENSMUSG00000024426	chr17:35904290:35904335:-@chr17:35904108:35904176:-@chr17:35901983:35902054:-	0.38	0.21	0.57	0.68	0.4	0.94	0.38	0.21	0.57	0.41	0.17	0.7	-0.3	1.78	-0.03	0.45
ENSMUSG00000026890	chr2:36090962:36091136:-@chr2:36087368:36087471:-@chr2:36081953:36084075:-	0.4	0.01	0.9	0.53	0.13	0.96	0.4	0.01	0.9	0.51	0.15	0.9	-0.13	1.36	-0.11	0.87
ENSMUSG00000036834	chr3:63701784:63702138:-@chr3:63699780:63699802:-@chr3:63696237:63699477:-	0.42	0.1	0.85	0.56	0.11	0.94	0.42	0.1	0.85	0.39	0	0.94	-0.14	1.26	0.03	0.97
ENSMUSG00000022518	chr16:4864574:4864667:+@chr16:4866204:4866284:+@chr16:4867295:4867691:+	0.47	0.04	0.98	0.37	0.02	0.86	0.47	0.04	0.98	0.5	0.06	0.98	0.1	1.4	-0.03	0.83
ENSMUSG00000032860	chr7:101011712:101011991:-@chr7:101003564:101003754:-@chr7:100996572:100999100:-	0.54	0.2	0.86	0.25	0.04	0.6	0.54	0.2	0.86	0.73	0.34	0.96	0.29	1.26	-0.19	0.97
ENSMUSG00000015882	chr5:45747056:45747307:-@chr5:45735731:45735824:-@chr5:45697184:45701997:-	0.86	0.64	0.98	0.78	0.43	1	0.86	0.64	0.98	0.58	0.28	0.86	0.08	0.72	0.28	1.51
ENSMUSG00000042787	chr9:119444923:119445150:+@chr9:119445287:119445321:+@chr9:119446949:119447098:+	0.17	0.03	0.53	0.26	0.01	0.7	0.17	0.03	0.53	0.47	0.19	0.77	-0.09	0.6	-0.3	1.62
ENSMUSG00000072966	chrX:135839034:135839262:+@chrX:135839802:135839872:+@chrX:135839997:135840209:+	0.39	0.06	0.77	0.49	0.07	0.96	0.39	0.06	0.77	0.58	0.12	0.96	-0.1	0.9	-0.19	1.32
ENSMUSG00000003847	chr8:107293470:107293898:+@chr8:107295581:107295634:+@chr8:107324639:107324764:+	0.62	0.4	0.82	0.33	0.12	0.57	0.62	0.4	0.82	0.53	0.34	0.7	0.29	1.79	0.09	0.43
ENSMUSG00000052688	chr1:131698416:131698631:+@chr1:131705596:131705721:+@chr1:131711620:131713464:+	0.54	0.19	0.9	0.27	0	0.72	0.54	0.19	0.9	0.65	0.27	0.94	0.27	1.38	-0.11	0.84
ENSMUSG00000017950	chr2:163506938:163506987:+@chr2:163536923:163537058:+@chr2:163551577:163551751:+	0.18	0	0.64	0.55	0.01	0.95	0.18	0	0.64	0.18	0.01	0.59	-0.37	1.74	0	0.47
ENSMUSG00000033918	chr16:20297593:20297733:-@chr16:20293298:20293402:-@chr16:20287857:20287952:-	0.66	0.54	0.79	0.71	0.54	0.89	0.66	0.54	0.79	0.87	0.72	0.98	-0.05	0.33	-0.21	1.88
ENSMUSG00000074129,ENSMUSG00000089989	chr7:45132228:45132412:-@chr7:45132069:45132137:-@chr7:45131189:45131431:-	0.53	0.13	0.98	0.45	0.05	0.95	0.53	0.13	0.98	0.33	0.03	0.87	0.08	0.83	0.2	1.38
ENSMUSG00000085492	chr17:71568610:71568670:-@chr17:71561338:71561437:-@chr17:71557027:71558343:-	0.6	0.1	0.95	0.41	0.04	0.98	0.6	0.1	0.95	0.49	0.04	0.93	0.19	1.15	0.11	1.06
ENSMUSG00000068966	chr2:33431231:33431324:-@chr2:33428101:33428220:-@chr2:33406108:33412495:-	0.44	0.27	0.65	0.73	0.47	0.93	0.44	0.27	0.65	0.54	0.32	0.77	-0.29	1.71	-0.1	0.49
ENSMUSG00000027829	chr3:65956853:65956962:-@chr3:65955204:65955276:-@chr3:65951434:65951554:-	0.2	0.15	0.24	0.32	0.23	0.43	0.2	0.15	0.24	0.32	0.2	0.44	-0.12	1.4	-0.12	0.8
ENSMUSG00000035666	chr2:28839883:28840360:-@chr2:28836025:28836127:-@chr2:28833550:28835373:-	0.1	0.05	0.17	0.18	0.09	0.33	0.1	0.05	0.17	0.24	0.15	0.36	-0.08	0.34	-0.14	1.86
ENSMUSG00000080316	chr17:17836721:17836744:+@chr17:17837509:17837586:+@chr17:17838087:17838243:+	0.61	0.19	0.95	0.57	0.18	0.92	0.61	0.19	0.95	0.53	0.09	0.99	0.04	1.08	0.08	1.12
ENSMUSG00000037996	chr4:87226883:87227963:-@chr4:87176162:87176347:-@chr4:87076119:87076157:-	0.5	0.02	0.91	0.53	0.06	0.96	0.5	0.02	0.91	0.34	0.01	0.92	-0.03	0.77	0.16	1.43
ENSMUSG00000034731	chr14:78577449:78577557:-@chr14:78575887:78576017:-@chr14:78569609:78570157:-	0.78	0.53	0.95	0.73	0.3	0.98	0.78	0.53	0.95	0.45	0.19	0.78	0.05	0.58	0.33	1.62
ENSMUSG00000022401	chr15:81414432:81414548:+@chr15:81415847:81415994:+@chr15:81427276:81427683:+	0.07	0.02	0.16	0.28	0.08	0.52	0.07	0.02	0.16	0.25	0.1	0.44	-0.21	1.03	-0.18	1.16
ENSMUSG00000090206	chr8:95320650:95320714:+@chr8:95320906:95320938:+@chr8:95325487:95325604:+	0.42	0.08	0.92	0.45	0.07	0.89	0.42	0.08	0.92	0.57	0.13	0.91	-0.03	1.03	-0.15	1.16
ENSMUSG00000078812	chr11:69920801:69920947:-@chr11:69920341:69920422:-@chr11:69919151:69919336:-	0.11	0.09	0.13	0.11	0.09	0.14	0.11	0.09	0.13	0.07	0.05	0.09	0	0.04	0.04	2.15
ENSMUSG00000034445	chr19:10577723:10578083:+@chr19:10578982:10579074:+@chr19:10580463:10580562:+	0.78	0.61	0.92	0.5	0.29	0.77	0.78	0.61	0.92	0.86	0.58	0.98	0.28	1.78	-0.08	0.41
ENSMUSG00000034343	chr1:91250319:91250437:+@chr1:91253760:91253827:+@chr1:91254215:91254393:+	0.08	0	0.2	0.07	0	0.24	0.08	0	0.2	0.35	0.14	0.65	0.01	0.22	-0.27	1.96
NA	chr1:132228914:132229036:+@chr1:132232267:132232337:+@chr1:132256697:132257382:+	0.71	0.22	0.98	0.56	0.05	0.95	0.71	0.22	0.98	0.53	0.06	0.94	0.15	1.29	0.18	0.89
ENSMUSG00000097462	chr6:92940582:92940809:+@chr6:93107067:93107159:+@chr6:93192109:93192203:+	0.49	0.11	0.8	0.52	0.07	0.94	0.49	0.11	0.8	0.39	0.03	0.87	-0.03	0.95	0.1	1.23
ENSMUSG00000073139	chrX:70467154:70467361:-@chrX:70465003:70465086:-@chrX:70462845:70463021:-	0.57	0.41	0.72	0.77	0.58	0.95	0.57	0.41	0.72	0.76	0.61	0.88	-0.2	1.07	-0.19	1.1
ENSMUSG00000053219,ENSMUSG00000075297	chr10:22158609:22158718:+@chr10:22172004:22172101:+@chr10:22173181:22173250:+	0.62	0.44	0.79	0.86	0.59	0.98	0.62	0.44	0.79	0.73	0.45	0.91	-0.24	1.64	-0.11	0.53
ENSMUSG00000021916	chr14:31001433:31001997:+@chr14:31004718:31004790:+@chr14:31006459:31006512:+	0.21	0.02	0.54	0.2	0.03	0.5	0.21	0.02	0.54	0.52	0.24	0.88	0.01	0.57	-0.31	1.59
ENSMUSG00000097788	chr12:108539398:108539473:-@chr12:108539254:108539306:-@chr12:108536402:108537523:-	0.49	0.02	0.85	0.5	0.04	0.96	0.49	0.02	0.85	0.41	0.01	0.96	-0.01	0.92	0.08	1.24
ENSMUSG00000030016	chr6:83954711:83954761:+@chr6:83956694:83956762:+@chr6:83957509:83957592:+	0.53	0.42	0.65	0.5	0.34	0.68	0.53	0.42	0.65	0.34	0.19	0.53	0.03	0.3	0.19	1.86
ENSMUSG00000028965	chr4:150934287:150934411:+@chr4:150935422:150935556:+@chr4:150944773:150946102:+	0.46	0.1	0.81	0.45	0.09	0.87	0.46	0.1	0.81	0.24	0.01	0.69	0.01	0.7	0.22	1.46
ENSMUSG00000075415	chr2:31054024:31054218:-@chr2:31052985:31053137:-@chr2:31044882:31044896:-	0.28	0.18	0.42	0.16	0.07	0.3	0.28	0.18	0.42	0.14	0.07	0.23	0.12	0.74	0.14	1.42
ENSMUSG00000022377	chr15:64119958:64120186:-@chr15:64110906:64111076:-@chr15:64102403:64102472:-	0.61	0.48	0.74	0.53	0.39	0.7	0.61	0.48	0.74	0.41	0.29	0.56	0.08	0.36	0.2	1.8
ENSMUSG00000013878	chr8:26129047:26129155:+@chr8:26138705:26138749:+@chr8:26138869:26138979:+	0.4	0.03	0.9	0.51	0.13	0.86	0.4	0.03	0.9	0.54	0.08	0.88	-0.11	1.22	-0.14	0.93
ENSMUSG00000021493	chr13:55508780:55508810:-@chr13:55508208:55508326:-@chr13:55507864:55507880:-	0.52	0.04	0.96	0.4	0.06	0.89	0.52	0.04	0.96	0.55	0.14	0.93	0.12	1.02	-0.03	1.13
ENSMUSG00000028959	chr5:24443895:24444305:-@chr5:24443277:24443456:-@chr5:24443004:24443143:-	0.96	0.9	1	0.91	0.83	0.98	0.96	0.9	1	0.83	0.71	0.93	0.05	0.19	0.13	1.96
ENSMUSG00000018395	chr11:53594277:53594387:+@chr11:53594826:53594951:+@chr11:53597959:53598012:+	0.94	0.83	1	0.91	0.76	0.99	0.94	0.83	1	0.7	0.47	0.9	0.03	0.16	0.24	1.99
ENSMUSG00000047040,ENSMUSG00000078700	chr11:96929324:96929509:+@chr11:96931511:96931553:+@chr11:96934515:96935647:+	0.35	0.04	0.87	0.45	0.06	0.92	0.35	0.04	0.87	0.44	0.13	0.91	-0.1	1.08	-0.09	1.06
ENSMUSG00000079424	chr5:95340184:95340477:+@chr5:95340969:95341586:+@chr5:95342371:95343917:+	0.4	0.1	0.81	0.41	0.03	0.97	0.4	0.1	0.81	0.3	0.04	0.81	-0.01	1.07	0.1	1.07
ENSMUSG00000041879	chr1:135426931:135427041:-@chr1:135425924:135425986:-@chr1:135420292:135420353:-	0.28	0.05	0.71	0.63	0.11	0.99	0.28	0.05	0.71	0.21	0.01	0.63	-0.35	1.67	0.07	0.47
ENSMUSG00000087578	chr6:83108884:83109053:-@chr6:83107743:83107914:-@chr6:83106608:83107190:-	0.51	0.17	0.87	0.45	0.04	0.9	0.51	0.17	0.87	0.58	0.12	1	0.06	1.17	-0.07	0.97
ENSMUSG00000015766	chr6:137648117:137648283:-@chr6:137595328:137595408:-@chr6:137591418:137591492:-	0.57	0.17	0.93	0.43	0.02	0.86	0.57	0.17	0.93	0.58	0.18	0.91	0.14	1.43	-0.01	0.71
ENSMUSG00000041607	chr18:82554320:82554750:+@chr18:82561778:82561855:+@chr18:82572825:82572926:+	0.5	0.11	0.9	0.38	0.02	0.91	0.5	0.11	0.9	0.27	0.02	0.85	0.12	1.19	0.23	0.95
ENSMUSG00000030922	chr7:119895861:119895890:+@chr7:119900111:119900308:+@chr7:119909804:119909962:+	0.13	0.04	0.26	0.45	0.17	0.77	0.13	0.04	0.26	0.18	0.05	0.39	-0.32	1.85	-0.05	0.28
ENSMUSG00000048251	chr12:107989465:107989830:-@chr12:107965672:107965887:-@chr12:107910403:107917414:-	0.39	0.03	0.81	0.49	0.09	0.97	0.39	0.03	0.81	0.55	0.17	0.91	-0.1	1.07	-0.16	1.06
NA	chr4:117125329:117125725:-@chr4:117124504:117124726:-@chr4:117123729:117123782:-	0.26	0.15	0.4	0.53	0.29	0.74	0.26	0.15	0.4	0.17	0.07	0.34	-0.27	1.71	0.09	0.42
ENSMUSG00000026797	chr2:32796016:32796170:-@chr2:32794588:32794713:-@chr2:32787607:32789637:-	0.31	0.16	0.47	0.1	0.02	0.23	0.31	0.16	0.47	0.22	0.11	0.37	0.21	1.79	0.09	0.34
NA	chr1:139890226:139890402:-@chr1:139817393:139817552:-@chr1:139813434:139813616:-	0.69	0.28	0.97	0.47	0.07	0.83	0.69	0.28	0.97	0.53	0.01	0.96	0.22	0.88	0.16	1.25
ENSMUSG00000063889	chr18:3281688:3281747:-@chr18:3276694:3276729:-@chr18:3273422:3273578:-	0.44	0.07	0.9	0.71	0.35	0.99	0.44	0.07	0.9	0.52	0.15	0.91	-0.27	1.1	-0.08	1.02
ENSMUSG00000080316	chr17:17837509:17837586:+@chr17:17837665:17837769:+@chr17:17838087:17838243:+	0.47	0.16	0.8	0.45	0.14	0.79	0.47	0.16	0.8	0.78	0.48	0.99	0.02	0.72	-0.31	1.4
ENSMUSG00000044566	chr13:38036788:38037069:-@chr13:38032365:38032624:-@chr13:38028103:38028190:-	0.44	0.11	0.88	0.52	0.2	0.85	0.44	0.11	0.88	0.62	0.05	0.98	-0.08	0.88	-0.18	1.24
ENSMUSG00000020166	chr10:116549033:116549175:-@chr10:116517317:116517383:-@chr10:116507041:116507188:-	0.55	0.43	0.66	0.57	0.39	0.76	0.55	0.43	0.66	0.78	0.59	0.94	-0.02	0.29	-0.23	1.83
ENSMUSG00000008855	chr11:102224734:102224955:-@chr11:102221768:102221851:-@chr11:102219145:102219281:-	0.32	0.08	0.63	0.34	0.01	0.89	0.32	0.08	0.63	0.53	0.15	0.88	-0.02	0.96	-0.21	1.16
NA	chr7:25093485:25093686:-@chr7:25093288:25093361:-@chr7:25091115:25093002:-	0.53	0.08	0.93	0.71	0.28	0.93	0.53	0.08	0.93	0.5	0.12	0.98	-0.18	0.87	0.03	1.25
ENSMUSG00000079457	chr1:85202140:85202308:+@chr1:85208004:85208197:+@chr1:85212627:85213762:+	0.47	0.08	0.92	0.43	0.02	0.98	0.47	0.08	0.92	0.52	0.1	0.96	0.04	1.29	-0.05	0.83
ENSMUSG00000090165	chr1:88055388:88055664:+@chr1:88056262:88056336:+@chr1:88215044:88215175:+	0.49	0.08	0.89	0.56	0.07	0.92	0.49	0.08	0.89	0.38	0.05	0.8	-0.07	1.19	0.11	0.93
ENSMUSG00000054162	chr8:62951800:62951988:+@chr8:63113434:63113442:+@chr8:63113543:63113588:+	0.59	0.11	1	0.53	0.07	0.97	0.59	0.11	1	0.51	0.07	0.94	0.06	1.33	0.08	0.79
ENSMUSG00000043943	chr9:18402569:18402794:-@chr9:18398032:18398123:-@chr9:18388074:18388194:-	0.5	0.14	0.91	0.5	0.06	0.91	0.5	0.14	0.91	0.24	0.04	0.74	0	0.77	0.26	1.35
ENSMUSG00000059552	chr11:69580359:69580515:+@chr11:69581054:69581465:+@chr11:69586891:69586973:+	0.03	0.03	0.04	0.03	0.02	0.04	0.03	0.03	0.04	0.05	0.04	0.06	0	0	-0.02	2.11
ENSMUSG00000021684	chr13:95090278:95090356:-@chr13:95086728:95086868:-@chr13:95052888:95052930:-	0.62	0.19	0.96	0.62	0.16	0.97	0.62	0.19	0.96	0.4	0.01	0.81	0	0.83	0.22	1.28
ENSMUSG00000074272	chr7:25471798:25472073:-@chr7:25466317:25466437:-@chr7:25465468:25465520:-	0.55	0.22	0.9	0.3	0.06	0.72	0.55	0.22	0.9	0.45	0.09	0.92	0.25	1.23	0.1	0.88
ENSMUSG00000028613	chr4:107847444:107847566:+@chr4:107848281:107848403:+@chr4:107851308:107851427:+	0.5	0.22	0.77	0.2	0.02	0.44	0.5	0.22	0.77	0.44	0.1	0.81	0.3	1.51	0.06	0.6
ENSMUSG00000034023	chr6:113585472:113585543:+@chr6:113586210:113586248:+@chr6:113587382:113587456:+	0.52	0.4	0.64	0.65	0.44	0.83	0.52	0.4	0.64	0.74	0.52	0.91	-0.13	0.57	-0.22	1.53
ENSMUSG00000032010	chr9:44067021:44067220:+@chr9:44068038:44068295:+@chr9:44075366:44076222:+	0.05	0	0.19	0.07	0	0.22	0.05	0	0.19	0.37	0.08	0.83	-0.02	0.15	-0.32	1.95
ENSMUSG00000034903	chr2:65107012:65107086:-@chr2:65105715:65105828:-@chr2:65103160:65103394:-	0.34	0.19	0.51	0.61	0.34	0.84	0.34	0.19	0.51	0.35	0.18	0.61	-0.27	1.74	-0.01	0.36
ENSMUSG00000090828	chr3:34638358:34638639:+@chr3:34653178:34653284:+@chr3:34675669:34677993:+	0.48	0.14	0.95	0.38	0.02	0.85	0.48	0.14	0.95	0.64	0.24	0.97	0.1	0.93	-0.16	1.17
ENSMUSG00000036555	chr5:140670467:140670567:-@chr5:140669022:140669105:-@chr5:140666008:140666208:-	0.54	0.21	0.87	0.57	0.17	0.91	0.54	0.21	0.87	0.45	0.03	0.95	-0.03	0.79	0.09	1.31
ENSMUSG00000034842	chr5:92388134:92388211:+@chr5:92392469:92393177:+@chr5:92401996:92402028:+	0.6	0.14	0.96	0.5	0.08	0.92	0.6	0.14	0.96	0.58	0.24	0.99	0.1	1.32	0.02	0.78
ENSMUSG00000000827	chr2:181508166:181508267:+@chr2:181511574:181511615:+@chr2:181513039:181513087:+	0.41	0.35	0.48	0.57	0.46	0.68	0.41	0.35	0.48	0.46	0.35	0.58	-0.16	1.88	-0.05	0.21
ENSMUSG00000020782	chr11:115854547:115854575:+@chr11:115854732:115854859:+@chr11:115855063:115855105:+	0.49	0.03	0.98	0.48	0.03	0.86	0.49	0.03	0.98	0.59	0.17	0.94	0.01	1.2	-0.1	0.89
ENSMUSG00000039853	chr4:46521982:46522144:-@chr4:46510437:46510529:-@chr4:46493781:46495767:-	0.63	0.09	0.98	0.78	0.28	0.99	0.63	0.09	0.98	0.48	0.1	0.85	-0.15	0.8	0.15	1.29
ENSMUSG00000022537	chr16:30529412:30529570:-@chr16:30518300:30518332:-@chr16:30511855:30514822:-	0.58	0.19	0.92	0.6	0.2	0.91	0.58	0.19	0.92	0.41	0	0.93	-0.02	0.88	0.17	1.21
ENSMUSG00000031558	chr5:48219917:48220080:+@chr5:48220967:48220990:+@chr5:48224653:48224803:+	0.44	0.17	0.73	0.27	0.03	0.74	0.44	0.17	0.73	0.36	0.1	0.73	0.17	1.22	0.08	0.87
ENSMUSG00000023050	chr15:102509919:102510005:-@chr15:102509290:102509397:-@chr15:102505090:102505568:-	0.58	0.26	0.89	0.24	0.03	0.63	0.58	0.26	0.89	0.64	0.28	0.93	0.34	1.46	-0.06	0.63
ENSMUSG00000092260	chr8:69744461:69744587:-@chr8:69744192:69744252:-@chr8:69741639:69743610:-	0.84	0.53	0.99	0.82	0.56	0.99	0.84	0.53	0.99	0.54	0.23	0.84	0.02	0.38	0.3	1.71
ENSMUSG00000003518	chr11:101984612:101984751:-@chr11:101981617:101981843:-@chr11:101971143:101974939:-	0.87	0.73	0.96	0.66	0.48	0.85	0.87	0.73	0.96	0.71	0.52	0.89	0.21	1.15	0.16	0.94
ENSMUSG00000073096	chr6:48554799:48554982:+@chr6:48556955:48557094:+@chr6:48568137:48570722:+	0.81	0.47	0.99	0.58	0.2	0.93	0.81	0.47	0.99	0.66	0.33	0.94	0.23	1.26	0.15	0.83
ENSMUSG00000056917	chr19:5663604:5663707:-@chr19:5661596:5661623:-@chr19:5660314:5661111:-	0.45	0.07	0.81	0.26	0.02	0.66	0.45	0.07	0.81	0.25	0.03	0.6	0.19	1.12	0.2	0.97
ENSMUSG00000075256	chr2:79456551:79456636:-@chr2:79444044:79444084:-@chr2:79392943:79393185:-	0.28	0.02	0.8	0.42	0.05	0.96	0.28	0.02	0.8	0.5	0.05	0.99	-0.14	0.95	-0.22	1.13
ENSMUSG00000028906	chr4:131967788:131967975:-@chr4:131963929:131963970:-@chr4:131962924:131962986:-	0.05	0	0.2	0.15	0.02	0.4	0.05	0	0.2	0.29	0.09	0.62	-0.1	0.33	-0.24	1.75
ENSMUSG00000026289	chr1:87774145:87774231:+@chr1:87774813:87774869:+@chr1:87775757:87775859:+	0.14	0.08	0.21	0.16	0.08	0.27	0.14	0.08	0.21	0.32	0.18	0.49	-0.02	0.16	-0.18	1.92
ENSMUSG00000014668	chr5:110136051:110136194:+@chr5:110136483:110136652:+@chr5:110140354:110140453:+	0	0	0.02	0.03	0	0.12	0	0	0.02	0.08	0.03	0.16	-0.03	0.06	-0.08	2.02
ENSMUSG00000075256	chr2:79392943:79393185:-@chr2:79354775:79355064:-@chr2:79343217:79343291:-	0.59	0.2	0.98	0.73	0.35	0.99	0.59	0.2	0.98	0.5	0.06	0.96	-0.14	0.98	0.09	1.1
ENSMUSG00000039137	chr4:63431850:63432059:-@chr4:63429233:63429417:-@chr4:63429086:63429118:-	0.39	0.11	0.88	0.15	0.01	0.81	0.39	0.11	0.88	0.47	0.06	0.92	0.24	1.11	-0.08	0.97
ENSMUSG00000034243	chr16:36885011:36885188:+@chr16:36886134:36886228:+@chr16:36887239:36887403:+	0.56	0.38	0.75	0.76	0.57	0.92	0.56	0.38	0.75	0.75	0.6	0.9	-0.2	1.02	-0.19	1.05
ENSMUSG00000027630	chr3:22076652:22076954:+@chr3:22089413:22089522:+@chr3:22148942:22149008:+	0.25	0.09	0.53	0.21	0.02	0.56	0.25	0.09	0.53	0.57	0.28	0.8	0.04	0.47	-0.32	1.6
ENSMUSG00000022197	chr15:12549236:12549877:-@chr15:12545490:12545519:-@chr15:12457798:12458299:-	0.34	0.04	0.84	0.3	0.01	0.73	0.34	0.04	0.84	0.48	0.08	0.93	0.04	0.55	-0.14	1.52
ENSMUSG00000051177	chr2:135387798:135387884:+@chr2:135399249:135399366:+@chr2:135472053:135475258:+	0.17	0.01	0.57	0.35	0.07	0.71	0.17	0.01	0.57	0.37	0.02	0.85	-0.18	0.94	-0.2	1.13
ENSMUSG00000029544	chr5:115186012:115186121:-@chr5:115180788:115180971:-@chr5:115176240:115176270:-	0.49	0.26	0.76	0.34	0.09	0.79	0.49	0.26	0.76	0.77	0.36	1	0.15	0.67	-0.28	1.4
ENSMUSG00000029207	chr5:66337466:66337665:-@chr5:66323602:66323607:-@chr5:66313315:66313429:-	0.49	0.03	0.96	0.48	0.06	0.98	0.49	0.03	0.96	0.52	0.06	0.98	0.01	1.13	-0.03	0.94
ENSMUSG00000024378	chr18:33206120:33206246:-@chr18:33205221:33205325:-@chr18:33201421:33203815:-	0.12	0.06	0.23	0.34	0.15	0.61	0.12	0.06	0.23	0.25	0.1	0.46	-0.22	1.57	-0.13	0.49
NA	chr7:106626990:106627061:-@chr7:106613233:106613299:-@chr7:106595549:106604039:-	0.39	0.07	0.78	0.54	0.09	0.96	0.39	0.07	0.78	0.59	0.05	0.95	-0.15	1.14	-0.2	0.92
ENSMUSG00000032258	chr9:83441041:83441127:-@chr9:83428880:83428948:-@chr9:83426593:83426961:-	0.35	0.08	0.82	0.44	0.04	0.96	0.35	0.08	0.82	0.61	0.27	0.87	-0.09	1.01	-0.26	1.05
ENSMUSG00000029227	chr5:74572429:74572585:+@chr5:74585046:74585072:+@chr5:74587003:74587057:+	0.38	0.28	0.5	0.46	0.3	0.62	0.38	0.28	0.5	0.58	0.43	0.73	-0.08	0.38	-0.2	1.68
ENSMUSG00000035203	chr7:5080235:5080477:+@chr7:5082018:5082121:+@chr7:5083730:5083982:+	0.72	0.59	0.86	0.71	0.56	0.85	0.72	0.59	0.86	0.91	0.8	0.98	0.01	0.27	-0.19	1.79
ENSMUSG00000024921	chr19:26751824:26752041:+@chr19:26759878:26759931:+@chr19:26771508:26771609:+	0.29	0.04	0.78	0.53	0.12	0.94	0.29	0.04	0.78	0.2	0.01	0.67	-0.24	1.28	0.09	0.78
ENSMUSG00000048728	chr11:50886369:50886498:-@chr11:50878043:50878105:-@chr11:50872720:50874287:-	0.43	0.07	0.94	0.48	0.06	0.92	0.43	0.07	0.94	0.38	0.02	0.87	-0.05	1.25	0.05	0.81
ENSMUSG00000015214	chrX:71369799:71369904:+@chrX:71376887:71376910:+@chrX:71379014:71379064:+	0.38	0.03	0.88	0.43	0.05	0.94	0.38	0.03	0.88	0.31	0.01	0.85	-0.05	0.86	0.07	1.2
ENSMUSG00000069793	chr11:82991588:82991830:-@chr11:82990942:82991057:-@chr11:82987239:82988308:-	0.54	0.3	0.79	0.35	0.05	0.75	0.54	0.3	0.79	0.45	0.07	0.97	0.19	0.98	0.09	1.08
ENSMUSG00000064177	chr6:113719110:113719226:-@chr6:113717053:113717161:-@chr6:113716119:113716269:-	0.69	0.33	0.98	0.62	0.14	0.95	0.69	0.33	0.98	0.45	0.08	0.91	0.07	0.83	0.24	1.23
ENSMUSG00000049606	chr5:106681904:106682013:-@chr5:106679680:106679743:-@chr5:106666785:106666845:-	0.78	0.45	0.98	0.41	0.05	0.75	0.78	0.45	0.98	0.78	0.49	0.97	0.37	1.59	0	0.46
ENSMUSG00000031631	chr8:46163715:46163863:+@chr8:46164762:46164896:+@chr8:46169559:46170652:+	0.16	0.06	0.28	0.38	0.2	0.61	0.16	0.06	0.28	0.22	0.07	0.46	-0.22	1.74	-0.06	0.31
ENSMUSG00000020184	chr10:117709946:117710028:-@chr10:117709654:117709784:-@chr10:117705155:117705229:-	0.66	0.59	0.73	0.79	0.71	0.86	0.66	0.59	0.73	0.68	0.6	0.76	-0.13	1.9	-0.02	0.15
ENSMUSG00000006476	chr2:25057101:25057176:+@chr2:25058229:25058321:+@chr2:25059021:25059073:+	0.51	0.18	0.84	0.54	0.09	0.99	0.51	0.18	0.84	0.63	0.2	0.94	-0.03	1.29	-0.12	0.76
ENSMUSG00000028653	chr4:123049477:123049554:+@chr4:123052066:123052175:+@chr4:123052484:123052601:+	0.73	0.62	0.82	0.65	0.51	0.79	0.73	0.62	0.82	0.9	0.75	0.99	0.08	0.31	-0.17	1.74
ENSMUSG00000001482,ENSMUSG00000092329	chr8:123446098:123446184:+@chr8:123447317:123447363:+@chr8:123447788:123447912:+	0.36	0.19	0.6	0.23	0.05	0.6	0.36	0.19	0.6	0.15	0.03	0.34	0.13	0.67	0.21	1.38
ENSMUSG00000023868	chr17:8525372:8525815:+@chr17:8756962:8757093:+@chr17:8898861:8898989:+	0.35	0.03	0.9	0.38	0.02	0.88	0.35	0.03	0.9	0.44	0.07	0.83	-0.03	1.21	-0.09	0.83
ENSMUSG00000031508	chr8:11628439:11628530:-@chr8:11623697:11623858:-@chr8:11619062:11619297:-	0.19	0.15	0.24	0.11	0.07	0.17	0.19	0.15	0.24	0.11	0.07	0.18	0.08	1.01	0.08	1.03
ENSMUSG00000024843	chr19:3864648:3864759:+@chr19:3875735:3875788:+@chr19:3884472:3884585:+	0.72	0.62	0.81	0.51	0.35	0.69	0.72	0.62	0.81	0.65	0.49	0.78	0.21	1.76	0.07	0.28
ENSMUSG00000052688	chr1:131697829:131697955:+@chr1:131705596:131705721:+@chr1:131711620:131713464:+	0.53	0.12	0.97	0.2	0.02	0.64	0.53	0.12	0.97	0.55	0.22	0.88	0.33	1.15	-0.02	0.89
ENSMUSG00000036834	chr3:63701784:63702138:-@chr3:63699780:63699802:-@chr3:63696234:63699480:-	0.17	0.01	0.71	0.42	0.04	0.77	0.17	0.01	0.71	0.31	0.01	0.75	-0.25	1.03	-0.14	1
ENSMUSG00000001833	chr9:25252439:25252699:+@chr9:25264203:25264207:+@chr9:25265394:25265496:+	0.38	0.01	0.95	0.44	0.02	0.91	0.38	0.01	0.95	0.46	0.06	0.9	-0.06	1.11	-0.08	0.92
ENSMUSG00000023764	chr11:3144217:3144292:-@chr11:3143695:3143790:-@chr11:3143260:3143336:-	0.33	0.04	0.86	0.5	0.15	0.85	0.33	0.04	0.86	0.24	0.04	0.52	-0.17	1.36	0.09	0.67
ENSMUSG00000035778	chr2:35422180:35422268:-@chr2:35416472:35416507:-@chr2:35414219:35414284:-	0.72	0.59	0.85	0.62	0.5	0.75	0.72	0.59	0.85	0.53	0.4	0.66	0.1	0.41	0.19	1.62
ENSMUSG00000001120	chr10:76781832:76781873:-@chr10:76770961:76771036:-@chr10:76767864:76767916:-	0.74	0.36	0.97	0.55	0.16	0.98	0.74	0.36	0.97	0.6	0.19	0.99	0.19	0.81	0.14	1.22
ENSMUSG00000020527	chr11:84895268:84895364:+@chr11:84895478:84895554:+@chr11:84897121:84897211:+	0.95	0.84	1	0.91	0.7	1	0.95	0.84	1	0.63	0.26	0.94	0.04	0.18	0.32	1.85
ENSMUSG00000009376	chr6:17463827:17464140:+@chr6:17487797:17487845:+@chr6:17491227:17492437:+	0.69	0.36	0.94	0.52	0.1	0.99	0.69	0.36	0.94	0.52	0.11	0.96	0.17	1.2	0.17	0.83
ENSMUSG00000040728	chr4:11344112:11344262:-@chr4:11338722:11338831:-@chr4:11332038:11333473:-	0.27	0.16	0.4	0.52	0.29	0.81	0.27	0.16	0.4	0.38	0.07	0.9	-0.25	1.39	-0.11	0.63
ENSMUSG00000029569	chr6:13607830:13608063:-@chr6:13607501:13607577:-@chr6:13606599:13607415:-	0.25	0.03	0.74	0.44	0.04	0.97	0.25	0.03	0.74	0.38	0.04	0.96	-0.19	1.15	-0.13	0.87
ENSMUSG00000045962	chr6:119946237:119946320:-@chr6:119944701:119944800:-@chr6:119943806:119943866:-	0.73	0.64	0.82	0.87	0.75	0.96	0.73	0.64	0.82	0.85	0.75	0.93	-0.14	1.3	-0.12	0.72
ENSMUSG00000031298	chrX:160491398:160491499:+@chrX:160492600:160492752:+@chrX:160496305:160498070:+	0.47	0.1	0.82	0.43	0.09	0.78	0.47	0.1	0.82	0.76	0.35	0.98	0.04	0.65	-0.29	1.37
ENSMUSG00000071454	chr12:3776059:3776109:+@chr12:3779619:3779654:+@chr12:3781106:3781398:+	0.62	0.27	0.91	0.41	0.08	0.78	0.62	0.27	0.91	0.73	0.36	0.97	0.21	1.16	-0.11	0.86
ENSMUSG00000072653	chr6:47945429:47945751:+@chr6:47945837:47945962:+@chr6:47948894:47949019:+	0.5	0.04	0.93	0.42	0.05	0.81	0.5	0.04	0.93	0.36	0.03	0.83	0.08	0.93	0.14	1.09
ENSMUSG00000041649	chrX:153238045:153238092:+@chrX:153308852:153308924:+@chrX:153370845:153370918:+	0.68	0.23	0.95	0.59	0.18	0.92	0.68	0.23	0.95	0.53	0.05	0.97	0.09	0.84	0.15	1.18
ENSMUSG00000031389	chrX:73906429:73906591:-@chrX:73906157:73906219:-@chrX:73900635:73900736:-	0.59	0.05	0.96	0.53	0.1	0.98	0.59	0.05	0.96	0.54	0.12	0.87	0.06	1.11	0.05	0.9
ENSMUSG00000026553	chr1:172104109:172104259:+@chr1:172104412:172104552:+@chr1:172105186:172105252:+	0.01	0.01	0.02	0.05	0.03	0.08	0.01	0.01	0.02	0.02	0	0.03	-0.04	2.01	-0.01	0
ENSMUSG00000030768	chr1:183202952:183203039:-@chr1:183173496:183173623:-@chr1:183135355:183135876:-	0.86	0.68	0.98	0.58	0.29	0.88	0.86	0.68	0.98	0.86	0.62	0.98	0.28	1.77	0	0.24
NA	chr1:132228914:132229036:+@chr1:132255355:132255494:+@chr1:132256697:132257382:+	0.47	0	1	0.54	0.13	0.99	0.47	0	1	0.76	0.33	0.99	-0.07	0.98	-0.29	1.02
ENSMUSG00000030782	chr7:128246971:128247008:+@chr7:128248177:128248292:+@chr7:128248420:128248472:+	0.67	0.47	0.86	0.78	0.57	0.95	0.67	0.47	0.86	0.9	0.61	0.99	-0.11	0.49	-0.23	1.51
ENSMUSG00000028341	chr4:48048952:48049128:+@chr4:48049934:48050005:+@chr4:48051246:48052201:+	0.37	0.03	0.94	0.53	0.12	1	0.37	0.03	0.94	0.52	0.1	0.96	-0.16	1.01	-0.15	0.99
ENSMUSG00000086541	chr15:56693955:56694077:+@chr15:56758362:56758482:+@chr15:56777728:56778399:+	0.34	0.03	0.93	0.55	0.09	0.98	0.34	0.03	0.93	0.4	0.03	0.78	-0.21	1.07	-0.06	0.93
ENSMUSG00000025656	chrX:95054943:95055011:-@chrX:95052680:95052790:-@chrX:95048944:95052154:-	0.4	0.04	0.73	0.43	0.01	0.97	0.4	0.04	0.73	0.54	0.1	0.95	-0.03	0.73	-0.14	1.27
ENSMUSG00000031399	chrX:74392675:74392727:-@chrX:74390991:74391104:-@chrX:74390474:74390497:-	0.6	0.17	0.99	0.67	0.2	0.97	0.6	0.17	0.99	0.54	0.1	0.9	-0.07	1.04	0.06	0.96
ENSMUSG00000087368	chrX:136741846:136741950:+@chrX:136743403:136743460:+@chrX:136744493:136744708:+	0.49	0.1	0.9	0.35	0.07	0.72	0.49	0.1	0.9	0.55	0.1	0.93	0.14	0.92	-0.06	1.08
ENSMUSG00000041439	chr1:52660807:52661087:-@chr1:52658699:52658723:-@chr1:52656305:52658545:-	0.46	0.01	0.95	0.36	0.05	0.77	0.46	0.01	0.95	0.44	0.03	0.92	0.1	0.88	0.02	1.12
ENSMUSG00000074129,ENSMUSG00000089989	chr7:45132069:45132137:-@chr7:45131667:45131740:-@chr7:45131188:45131566:-	0.56	0.06	0.98	0.63	0.1	0.96	0.56	0.06	0.98	0.27	0.02	0.76	-0.07	0.79	0.29	1.21
ENSMUSG00000038822	chr10:45677067:45677263:+@chr10:45686602:45686733:+@chr10:45700577:45700675:+	0.76	0.61	0.88	0.71	0.47	0.9	0.76	0.61	0.88	0.54	0.35	0.75	0.05	0.37	0.22	1.63
ENSMUSG00000029208	chr5:69561654:69561857:+@chr5:69564524:69564647:+@chr5:69565430:69565562:+	0.74	0.58	0.88	0.52	0.33	0.74	0.74	0.58	0.88	0.6	0.34	0.89	0.22	1.31	0.14	0.69
NA	chr15:83365029:83365513:-@chr15:83363820:83363928:-@chr15:83353847:83358950:-	0.49	0.31	0.65	0.37	0.16	0.64	0.49	0.31	0.65	0.23	0.01	0.7	0.12	0.57	0.26	1.43
ENSMUSG00000048677	chr7:145260872:145261000:-@chr7:145260089:145260138:-@chr7:145258515:145258614:-	0.57	0.34	0.83	0.83	0.52	0.99	0.57	0.34	0.83	0.66	0.31	0.92	-0.26	1.31	-0.09	0.68
NA	chr18:60212077:60212169:+@chr18:60212556:60212664:+@chr18:60245375:60247820:+	0.41	0.04	0.91	0.45	0.05	0.99	0.41	0.04	0.91	0.54	0.1	0.9	-0.04	1.09	-0.13	0.9
ENSMUSG00000020474	chr11:5837561:5838016:-@chr11:5837289:5837478:-@chr11:5836194:5836374:-	0.34	0.14	0.58	0.13	0.03	0.34	0.34	0.14	0.58	0.19	0.01	0.59	0.21	1.08	0.15	0.91
ENSMUSG00000028546	chr4:110211426:110211651:-@chr4:110209740:110209778:-@chr4:110203737:110206659:-	0.37	0.06	0.74	0.57	0.06	0.95	0.37	0.06	0.74	0.55	0.14	0.9	-0.2	0.97	-0.18	1.02
ENSMUSG00000035236	chr2:39189989:39190033:-@chr2:39150314:39150414:-@chr2:39132955:39133086:-	0.34	0.16	0.59	0.58	0.16	0.94	0.34	0.16	0.59	0.35	0.03	0.95	-0.24	1.03	-0.01	0.96
ENSMUSG00000037606	chr7:143702690:143702771:-@chr7:143701192:143701290:-@chr7:143700714:143700810:-	0.87	0.65	1	0.62	0.36	0.87	0.87	0.65	1	0.89	0.66	1	0.25	1.74	-0.02	0.25
ENSMUSG00000044937	chr10:86707236:86707344:+@chr10:86708563:86708647:+@chr10:86712765:86713739:+	0.54	0.06	0.95	0.49	0.12	0.87	0.54	0.06	0.95	0.33	0.02	0.79	0.05	0.81	0.21	1.18
ENSMUSG00000034312	chr6:90667900:90668076:-@chr6:90664022:90664071:-@chr6:90659598:90662955:-	0.79	0.51	0.96	0.69	0.36	0.96	0.79	0.51	0.96	0.55	0.25	0.88	0.1	0.69	0.24	1.3
ENSMUSG00000063652	chr11:53953001:53953183:-@chr11:53951707:53951842:-@chr11:53950824:53951355:-	0.62	0.3	0.89	0.38	0.08	0.85	0.62	0.3	0.89	0.51	0.1	0.98	0.24	1.03	0.11	0.96
ENSMUSG00000023206	chr2:11718264:11718458:+@chr2:11724096:11724128:+@chr2:11730571:11730646:+	0.46	0.01	0.99	0.45	0.02	0.97	0.46	0.01	0.99	0.65	0.09	0.98	0.01	0.6	-0.19	1.39
ENSMUSG00000038535	chr9:72339012:72339048:+@chr9:72339616:72340339:+@chr9:72360286:72360341:+	0.39	0.14	0.85	0.49	0.22	0.84	0.39	0.14	0.85	0.62	0.18	0.97	-0.1	0.77	-0.23	1.21
ENSMUSG00000039607	chr9:116681131:116681227:-@chr9:116678647:116678697:-@chr9:116636369:116636479:-	0.39	0.12	0.75	0.42	0.07	0.81	0.39	0.12	0.75	0.6	0.27	0.89	-0.03	0.83	-0.21	1.15
ENSMUSG00000036022	chrX:53254036:53254132:-@chrX:53253854:53253928:-@chrX:53243415:53245371:-	0.03	0	0.09	0.07	0.02	0.19	0.03	0	0.09	0.18	0.07	0.35	-0.04	0.15	-0.15	1.83
ENSMUSG00000020946	chr11:103686582:103686714:-@chr11:103683792:103683932:-@chr11:103676849:103679397:-	0.94	0.89	0.97	0.81	0.72	0.9	0.94	0.89	0.97	0.94	0.89	0.99	0.13	1.89	0	0.09
ENSMUSG00000021363	chr13:41034754:41034885:-@chr13:41030017:41030139:-@chr13:41025120:41026562:-	0.59	0.06	1	0.46	0.11	0.85	0.59	0.06	1	0.59	0.14	0.97	0.13	1	0	0.98
ENSMUSG00000028649	chr4:123355056:123355267:-@chr4:123354479:123354580:-@chr4:123351822:123351951:-	0.16	0.12	0.2	0.1	0.06	0.14	0.16	0.12	0.2	0.09	0.05	0.13	0.06	0.54	0.07	1.44
ENSMUSG00000043831	chr7:67224376:67224401:+@chr7:67225026:67225159:+@chr7:67225864:67228468:+	0.4	0.07	0.89	0.34	0.01	0.92	0.4	0.07	0.89	0.23	0	0.97	0.06	0.91	0.17	1.07
ENSMUSG00000022721	chr16:18251549:18251660:+@chr16:18252126:18252248:+@chr16:18252402:18252477:+	0.93	0.87	0.97	0.77	0.62	0.91	0.93	0.87	0.97	0.83	0.69	0.93	0.16	1.53	0.1	0.45
ENSMUSG00000035183	chr2:125080794:125080897:+@chr2:125081227:125081327:+@chr2:125083031:125083314:+	0.59	0.1	0.94	0.58	0.1	1	0.59	0.1	0.94	0.23	0	0.73	0.01	0.81	0.36	1.17
ENSMUSG00000038593	chr5:122247920:122248045:-@chr5:122247532:122247617:-@chr5:122246485:122246634:-	0.67	0.32	0.93	0.59	0.26	0.87	0.67	0.32	0.93	0.37	0.05	0.8	0.08	0.7	0.3	1.28
ENSMUSG00000087368	chrX:136741846:136741950:+@chrX:136743424:136743460:+@chrX:136744493:136744708:+	0.45	0.16	0.86	0.48	0.04	0.99	0.45	0.16	0.86	0.57	0.16	0.97	-0.03	1.04	-0.12	0.93
ENSMUSG00000041073	chr11:6599376:6602918:-@chr11:6599080:6599235:-@chr11:6598881:6598952:-	0.61	0.22	0.96	0.45	0.08	0.95	0.61	0.22	0.96	0.44	0.04	0.92	0.16	1.29	0.17	0.68
ENSMUSG00000026853	chr2:30415312:30415748:-@chr2:30414268:30414360:-@chr2:30413860:30413996:-	0.18	0.02	0.48	0.18	0.04	0.46	0.18	0.02	0.48	0.56	0.08	0.97	0	0.43	-0.38	1.54
ENSMUSG00000087060	chr11:16950882:16950930:-@chr11:16937373:16937484:-@chr11:16936455:16936564:-	0.31	0.04	0.9	0.41	0.1	0.85	0.31	0.04	0.9	0.49	0.13	0.85	-0.1	1	-0.18	0.97
ENSMUSG00000022518	chr16:4864574:4864667:+@chr16:4866130:4866284:+@chr16:4867295:4867691:+	0.39	0.11	0.75	0.45	0.08	0.88	0.39	0.11	0.75	0.37	0.01	0.92	-0.06	0.98	0.02	0.99
ENSMUSG00000075593	chr5:138271279:138272754:-@chr5:138270768:138271071:-@chr5:138264925:138266306:-	0.64	0.28	0.99	0.51	0.1	0.93	0.64	0.28	0.99	0.63	0.28	0.94	0.13	1.17	0.01	0.8
ENSMUSG00000044712	chr12:73293699:73293799:+@chr12:73310145:73310197:+@chr12:73318977:73319016:+	0.64	0.19	0.93	0.54	0.07	0.96	0.64	0.19	0.93	0.56	0.11	0.97	0.1	0.97	0.08	1
ENSMUSG00000042078	chr5:114091152:114091380:-@chr5:114065787:114065953:-@chr5:114065526:114065686:-	0.6	0.2	0.91	0.42	0.06	0.86	0.6	0.2	0.91	0.52	0.11	0.93	0.18	1.01	0.08	0.96
ENSMUSG00000021326	chr13:21190092:21190124:+@chr13:21190593:21190686:+@chr13:21191220:21191246:+	0.44	0.07	0.86	0.59	0.21	0.95	0.44	0.07	0.86	0.52	0.05	0.93	-0.15	0.82	-0.08	1.15
ENSMUSG00000039126	chr19:17208231:17208329:+@chr19:17211678:17211713:+@chr19:17212292:17212330:+	0.31	0.02	0.9	0.39	0.09	0.86	0.31	0.02	0.9	0.36	0.04	0.72	-0.08	0.82	-0.05	1.15
ENSMUSG00000025006	chr19:40373476:40373617:-@chr19:40369690:40369719:-@chr19:40364994:40365166:-	0.67	0.51	0.82	0.8	0.6	0.95	0.67	0.51	0.82	0.87	0.72	0.97	-0.13	0.62	-0.2	1.34
ENSMUSG00000048240	chr10:80997992:80998044:-@chr10:80968431:80968542:-@chr10:80952831:80952946:-	0.24	0.02	0.58	0.38	0.01	0.85	0.24	0.02	0.58	0.31	0.01	0.71	-0.14	0.94	-0.07	1.02
ENSMUSG00000090231,ENSMUSG00000024371,ENSMUSG00000092511	chr17:34859009:34859146:-@chr17:34858498:34858595:-@chr17:34857668:34857821:-	0.48	0.06	0.91	0.62	0.22	0.96	0.48	0.06	0.91	0.48	0.14	0.88	-0.14	0.95	0	1.01
ENSMUSG00000031109	chrX:49286845:49286904:-@chrX:49168641:49168784:-@chrX:49080617:49080751:-	0.6	0.17	0.96	0.72	0.39	0.98	0.6	0.17	0.96	0.33	0.09	0.71	-0.12	0.85	0.27	1.11
ENSMUSG00000056458	chr12:110811779:110811880:-@chr12:110810605:110810778:-@chr12:110809909:110810023:-	0.4	0.26	0.55	0.19	0.08	0.32	0.4	0.26	0.55	0.37	0.2	0.58	0.21	1.63	0.03	0.33
ENSMUSG00000030607	chr7:79097752:79101234:+@chr7:79108115:79108228:+@chr7:79111294:79111452:+	0.7	0.44	0.91	0.7	0.39	0.94	0.7	0.44	0.91	0.41	0.11	0.82	0	0.41	0.29	1.55
ENSMUSG00000041073	chr11:6599376:6602918:-@chr11:6599036:6599235:-@chr11:6598881:6598952:-	0.78	0.39	0.98	0.79	0.38	0.98	0.78	0.39	0.98	0.39	0.03	0.9	-0.01	0.52	0.39	1.44
NA	chrX:166383935:166384000:+@chrX:166385391:166385481:+@chrX:166386952:166389033:+	0.55	0.25	0.95	0.72	0.4	0.93	0.55	0.25	0.95	0.55	0.15	0.89	-0.17	0.91	0	1.04
ENSMUSG00000036923	chr10:62725768:62726099:-@chr10:62724263:62724432:-@chr10:62667821:62667973:-	0.39	0.02	1	0.4	0.02	0.82	0.39	0.02	1	0.24	0.01	0.84	-0.01	1.04	0.15	0.91
ENSMUSG00000025607	chr6:30896367:30896437:-@chr6:30896064:30896241:-@chr6:30895542:30895594:-	0.72	0.33	0.96	0.66	0.24	0.99	0.72	0.33	0.96	0.64	0.2	0.97	0.06	1.12	0.08	0.83
ENSMUSG00000031169	chrX:8203159:8203289:-@chrX:8201658:8201672:-@chrX:8201444:8201569:-	0.03	0	0.07	0.12	0.02	0.34	0.03	0	0.07	0.25	0.07	0.53	-0.09	0.24	-0.22	1.71
ENSMUSG00000033149	chr16:45953376:45953598:-@chr16:45873802:45873872:-@chr16:45860322:45860436:-	0.53	0.08	0.91	0.67	0.13	0.96	0.53	0.08	0.91	0.46	0.09	0.85	-0.14	0.81	0.07	1.14
ENSMUSG00000054199	chr3:88869803:88869843:+@chr3:88875907:88875930:+@chr3:88880071:88880174:+	0.56	0.45	0.66	0.69	0.57	0.81	0.56	0.45	0.66	0.4	0.29	0.53	-0.13	0.73	0.16	1.22
ENSMUSG00000086629	chrX:108836266:108836355:+@chrX:108871472:108871598:+@chrX:108886345:108886896:+	0.69	0.32	0.93	0.58	0.17	0.91	0.69	0.32	0.93	0.44	0.19	0.74	0.11	0.81	0.25	1.14
ENSMUSG00000055373	chr4:25799589:25800003:-@chr4:25755553:25755673:-@chr4:25709028:25709114:-	0.24	0.03	0.6	0.39	0.09	0.71	0.24	0.03	0.6	0.44	0.02	0.98	-0.15	0.82	-0.2	1.13
NA	chr14:93885697:93888888:-@chr14:93560476:93560577:-@chr14:93326679:93326880:-	0.27	0.04	0.89	0.5	0.07	0.93	0.27	0.04	0.89	0.38	0.02	0.91	-0.23	1.18	-0.11	0.76
ENSMUSG00000037224	chr5:34232154:34232243:-@chr5:34224952:34225053:-@chr5:34216561:34217865:-	0.44	0.12	0.82	0.71	0.32	0.97	0.44	0.12	0.82	0.47	0.09	0.85	-0.27	1.11	-0.03	0.83
ENSMUSG00000055884	chr12:65095721:65095905:+@chr12:65097302:65097508:+@chr12:65099248:65099452:+	0.6	0.46	0.74	0.7	0.55	0.86	0.6	0.46	0.74	0.79	0.62	0.94	-0.1	0.41	-0.19	1.53
ENSMUSG00000041180	chr19:36599596:36599719:+@chr19:36601432:36601528:+@chr19:36604250:36604357:+	0.52	0.21	0.9	0.59	0.14	0.96	0.52	0.21	0.9	0.62	0.2	0.96	-0.07	0.79	-0.1	1.15
ENSMUSG00000034551	chrX:111696967:111697079:-@chrX:111671343:111671489:-@chrX:111659634:111660743:-	0.6	0.19	0.99	0.68	0.25	0.96	0.6	0.19	0.99	0.68	0.16	0.97	-0.08	0.91	-0.08	1.03
NA	chr7:106629241:106629319:-@chr7:106626990:106627061:-@chr7:106595549:106604039:-	0.54	0.1	0.99	0.64	0.09	1	0.54	0.1	0.99	0.56	0.05	0.98	-0.1	0.75	-0.02	1.19
ENSMUSG00000092545	chr16:26733225:26733352:-@chr16:26730205:26730261:-@chr16:26714446:26715053:-	0.37	0.03	0.97	0.42	0.01	0.96	0.37	0.03	0.97	0.39	0.03	0.79	-0.05	0.84	-0.02	1.1
NA	chr2:64097842:64098038:-@chr2:64096895:64097064:-@chr2:63971508:63980899:-	0.43	0.03	0.93	0.6	0.16	0.94	0.43	0.03	0.93	0.33	0.02	0.78	-0.17	1	0.1	0.94
ENSMUSG00000035184	chr14:62564488:62564519:+@chr14:62587153:62587886:+@chr14:62605873:62608485:+	0.58	0.32	0.92	0.38	0.17	0.71	0.58	0.32	0.92	0.82	0.6	0.95	0.2	0.83	-0.24	1.11
ENSMUSG00000020111	chr10:59756706:59756717:+@chr10:59767084:59767089:+@chr10:59768138:59768252:+	0.45	0.07	0.99	0.4	0.05	0.87	0.45	0.07	0.99	0.38	0.02	0.97	0.05	0.85	0.07	1.09
ENSMUSG00000040929	chr19:28010972:28011166:-@chr19:27923208:27923266:-@chr19:27900779:27900903:-	0.48	0.08	0.93	0.54	0.03	0.97	0.48	0.08	0.93	0.66	0.19	0.94	-0.06	1	-0.18	0.93
ENSMUSG00000005677	chr1:171217314:171217430:+@chr1:171217626:171217731:+@chr1:171218589:171218845:+	0.31	0.03	0.71	0.3	0.05	0.67	0.31	0.03	0.71	0.35	0	0.83	0.01	0.87	-0.04	1.06
ENSMUSG00000024302	chr18:23631332:23631428:+@chr18:23633218:23633238:+@chr18:23643147:23643306:+	0.36	0.01	0.77	0.36	0.02	0.97	0.36	0.01	0.77	0.28	0.01	0.9	0	0.82	0.08	1.11
ENSMUSG00000008129	chr8:84161213:84161291:+@chr8:84162300:84162404:+@chr8:84166581:84167690:+	0.59	0.37	0.77	0.6	0.26	0.93	0.59	0.37	0.77	0.83	0.57	1	-0.01	0.69	-0.24	1.24
ENSMUSG00000073856	chr7:118855775:118855961:+@chr7:118872821:118872885:+@chr7:118876242:118876371:+	0.55	0.14	0.98	0.5	0.06	0.91	0.55	0.14	0.98	0.52	0.03	0.98	0.05	1.13	0.03	0.8
ENSMUSG00000040370	chr6:145211147:145211252:+@chr6:145214522:145214784:+@chr6:145215184:145215271:+	0.13	0.08	0.19	0.07	0.04	0.12	0.13	0.08	0.19	0.05	0.02	0.09	0.06	0.49	0.08	1.44
ENSMUSG00000027333	chr2:131520095:131520268:+@chr2:131522059:131522219:+@chr2:131524743:131525183:+	0.86	0.66	0.98	0.55	0.26	0.94	0.86	0.66	0.98	0.85	0.6	0.99	0.31	1.49	0.01	0.44
ENSMUSG00000026222	chr1:85679059:85679109:+@chr1:85681086:85681139:+@chr1:85691975:85692049:+	0.8	0.42	0.99	0.51	0.11	0.93	0.8	0.42	0.99	0.7	0.26	0.96	0.29	1.16	0.1	0.77
ENSMUSG00000020271	chr11:32642875:32642935:+@chr11:32652748:32652904:+@chr11:32708188:32708250:+	0.43	0.28	0.6	0.55	0.34	0.77	0.43	0.28	0.6	0.69	0.43	0.89	-0.12	0.48	-0.26	1.44
ENSMUSG00000034940	chr11:83982196:83982307:+@chr11:83986814:83986851:+@chr11:83987913:83987990:+	0.47	0.2	0.73	0.73	0.37	1	0.47	0.2	0.73	0.51	0.21	0.89	-0.26	1.15	-0.04	0.77
NA	chr2:60125463:60125810:-@chr2:60076870:60076911:-@chr2:60006043:60006189:-	0.64	0.31	0.9	0.83	0.58	0.95	0.64	0.31	0.9	0.35	0.13	0.69	-0.19	0.65	0.29	1.27
ENSMUSG00000028863	chr4:125107517:125107546:+@chr4:125107652:125107709:+@chr4:125108323:125108356:+	0.57	0.12	0.97	0.48	0.03	0.96	0.57	0.12	0.97	0.42	0.02	0.98	0.09	0.85	0.15	1.07
ENSMUSG00000029209	chr5:69584974:69585156:-@chr5:69582230:69582293:-@chr5:69579508:69579686:-	0.19	0.08	0.37	0.06	0	0.26	0.19	0.08	0.37	0.07	0	0.23	0.13	1.14	0.12	0.78
ENSMUSG00000044465	chr7:105399884:105400054:-@chr7:105391577:105391667:-@chr7:105390021:105390352:-	0.15	0.07	0.28	0.35	0.14	0.62	0.15	0.07	0.28	0.33	0.15	0.53	-0.2	0.91	-0.18	1
ENSMUSG00000028519	chr4:104679453:104679572:+@chr4:104681598:104681663:+@chr4:104688383:104688442:+	0.39	0.13	0.74	0.57	0.14	0.94	0.39	0.13	0.74	0.58	0.15	0.94	-0.18	0.91	-0.19	1
ENSMUSG00000023033	chr15:101018351:101018524:+@chr15:101024261:101024383:+@chr15:101029578:101029862:+	0.45	0.05	0.95	0.67	0.19	0.97	0.45	0.05	0.95	0.4	0.05	0.81	-0.22	1.05	0.05	0.86
ENSMUSG00000062609	chr16:95258202:95258374:+@chr16:95291811:95291896:+@chr16:95295591:95300258:+	0.39	0.06	0.83	0.33	0.03	0.88	0.39	0.06	0.83	0.52	0.04	0.92	0.06	0.89	-0.13	1.02
ENSMUSG00000024238	chr18:5593308:5593919:+@chr18:5594373:5594472:+@chr18:5705043:5705243:+	0.38	0.03	0.87	0.33	0.01	0.93	0.38	0.03	0.87	0.49	0.02	0.94	0.05	1	-0.11	0.91
ENSMUSG00000097709	chr13:3478303:3478352:+@chr13:3479522:3479574:+@chr13:3479909:3480001:+	0.38	0.13	0.67	0.46	0.12	0.85	0.38	0.13	0.67	0.15	0	0.47	-0.08	0.76	0.23	1.15
ENSMUSG00000042104	chr14:119002826:119002986:-@chr14:119001771:119001885:-@chr14:118998097:118998213:-	0.82	0.55	0.98	0.5	0.19	0.88	0.82	0.55	0.98	0.78	0.42	0.99	0.32	1.48	0.04	0.43
ENSMUSG00000030849	chr7:130199758:130199905:-@chr7:130198419:130198563:-@chr7:130196178:130196374:-	0.58	0.38	0.8	0.83	0.56	0.98	0.58	0.38	0.8	0.63	0.31	0.91	-0.25	1.35	-0.05	0.55
NA	chr14:54416589:54416770:-@chr14:54413880:54414013:-@chr14:54408503:54409048:-	0.35	0.28	0.43	0.28	0.17	0.4	0.35	0.28	0.43	0.2	0.12	0.31	0.07	0.31	0.15	1.59
ENSMUSG00000055102	chr7:43607169:43607274:+@chr7:43609786:43609978:+@chr7:43611983:43612109:+	0.6	0.42	0.81	0.8	0.59	0.95	0.6	0.42	0.81	0.76	0.42	0.99	-0.2	1.03	-0.16	0.87
ENSMUSG00000084925	chr14:20565011:20565047:+@chr14:20569870:20570022:+@chr14:20570342:20570680:+	0.57	0.19	0.9	0.65	0.2	0.98	0.57	0.19	0.9	0.49	0.1	0.87	-0.08	1.03	0.08	0.87
ENSMUSG00000033313	chr8:105266695:105267165:+@chr8:105267665:105267866:+@chr8:105268010:105269326:+	0.41	0.11	0.89	0.25	0.02	0.73	0.41	0.11	0.89	0.44	0.08	0.8	0.16	0.88	-0.03	1.02
NA	chr7:6730741:6731302:+@chr7:6737565:6737634:+@chr7:6738807:6738945:+	0.49	0.2	0.84	0.26	0	0.63	0.49	0.2	0.84	0.49	0.12	0.94	0.23	1.03	0	0.87
ENSMUSG00000034973	chr9:86545241:86545393:+@chr9:86548170:86548306:+@chr9:86548801:86548856:+	0.89	0.7	0.99	0.61	0.33	0.9	0.89	0.7	0.99	0.87	0.57	1	0.28	1.64	0.02	0.26
ENSMUSG00000000631	chr11:77801302:77801380:+@chr11:77815856:77815999:+@chr11:77817619:77817706:+	0.26	0.04	0.62	0.54	0.04	0.98	0.26	0.04	0.62	0.32	0.03	0.94	-0.28	1.35	-0.06	0.54
ENSMUSG00000085962	chr13:34983133:34983207:+@chr13:34984700:34984735:+@chr13:34989969:34990452:+	0.2	0.01	0.75	0.36	0.07	0.81	0.2	0.01	0.75	0.36	0.01	0.93	-0.16	1.04	-0.16	0.85
ENSMUSG00000025702	chr6:116350892:116350956:+@chr6:116376136:116376175:+@chr6:116376693:116376863:+	0.29	0.03	0.88	0.41	0.07	0.82	0.29	0.03	0.88	0.43	0.05	0.9	-0.12	0.9	-0.14	0.99
ENSMUSG00000094230	chr5:15516490:15516563:+@chr5:15523088:15523129:+@chr5:15525787:15525933:+	0.45	0.05	0.96	0.56	0.03	0.97	0.45	0.05	0.96	0.57	0.09	0.96	-0.11	0.78	-0.12	1.11
ENSMUSG00000079042,ENSMUSG00000053490	chr8:65018458:65018688:-@chr8:65017333:65017405:-@chr8:65012976:65014900:-	0.37	0.04	0.81	0.48	0.05	0.96	0.37	0.04	0.81	0.44	0.06	0.91	-0.11	0.86	-0.07	1.03
NA	chr17:10840384:10840489:+@chr17:11067129:11067292:+@chr17:11237462:11237702:+	0.54	0.07	0.91	0.52	0.05	0.98	0.54	0.07	0.91	0.68	0.2	0.96	0.02	0.96	-0.14	0.93
ENSMUSG00000023007	chr15:99304425:99304490:+@chr15:99305166:99305193:+@chr15:99305408:99305433:+	0.58	0.31	0.84	0.81	0.5	0.97	0.58	0.31	0.84	0.45	0.15	0.81	-0.23	1.1	0.13	0.79
ENSMUSG00000021699	chr13:109116236:109117080:+@chr13:109400864:109400891:+@chr13:109740387:109740578:+	0.46	0.04	0.91	0.44	0.12	1	0.46	0.04	0.91	0.4	0.04	0.86	0.02	0.8	0.06	1.09
ENSMUSG00000024225	chr17:28560571:28560714:-@chr17:28558761:28558883:-@chr17:28558214:28558440:-	0.66	0.27	0.96	0.77	0.43	0.97	0.66	0.27	0.96	0.45	0.12	0.88	-0.11	0.62	0.21	1.27
ENSMUSG00000063652	chr11:53969500:53969603:-@chr11:53960283:53960437:-@chr11:53959204:53959375:-	0.53	0.11	0.92	0.49	0.04	1	0.53	0.11	0.92	0.38	0.03	0.93	0.04	0.97	0.15	0.92
ENSMUSG00000030545	chr7:79742910:79743025:-@chr7:79740165:79740280:-@chr7:79737264:79737910:-	0.79	0.51	0.96	0.84	0.52	0.98	0.79	0.51	0.96	0.47	0.13	0.89	-0.05	0.39	0.32	1.5
NA	chr13:62106748:62106874:+@chr13:62169754:62169814:+@chr13:62171150:62173936:+	0.49	0.35	0.71	0.55	0.34	0.79	0.49	0.35	0.71	0.73	0.54	0.88	-0.06	0.44	-0.24	1.45
ENSMUSG00000027014	chr2:77946150:77946353:-@chr2:77940302:77940362:-@chr2:77936593:77936722:-	0.35	0.25	0.46	0.45	0.31	0.61	0.35	0.25	0.46	0.53	0.41	0.67	-0.1	0.45	-0.18	1.44
ENSMUSG00000087132	chr19:4443742:4443788:+@chr19:4444003:4444038:+@chr19:4447525:4448325:+	0.53	0.12	1	0.63	0.17	0.98	0.53	0.12	1	0.43	0.01	0.98	-0.1	1.17	0.1	0.72
ENSMUSG00000021012	chr12:98763823:98763978:+@chr12:98774245:98774319:+@chr12:98783582:98783702:+	0.78	0.7	0.84	0.84	0.74	0.91	0.78	0.7	0.84	0.9	0.82	0.96	-0.06	0.26	-0.12	1.62
ENSMUSG00000047909	chr2:11784291:11784452:+@chr2:11785170:11785260:+@chr2:11786224:11786302:+	0.25	0.15	0.37	0.2	0.07	0.35	0.25	0.15	0.37	0.1	0.03	0.21	0.05	0.29	0.15	1.59
NA	chr15:78435585:78435710:+@chr15:78436901:78436994:+@chr15:78438487:78439303:+	0.9	0.76	0.99	0.85	0.68	0.96	0.9	0.76	0.99	0.69	0.49	0.88	0.05	0.28	0.21	1.6
NA	chr6:129237739:129238045:-@chr6:129233064:129233153:-@chr6:129213381:129216536:-	0.51	0.07	0.97	0.74	0.35	0.98	0.51	0.07	0.97	0.64	0.22	0.93	-0.23	1.04	-0.13	0.84
NA	chr11:96731125:96731225:+@chr11:96754031:96754139:+@chr11:96758622:96759622:+	0.58	0.12	1	0.69	0.31	0.99	0.58	0.12	1	0.76	0.38	0.97	-0.11	0.68	-0.18	1.2
ENSMUSG00000022607	chr15:73394648:73394744:-@chr15:73392344:73392447:-@chr15:73343133:73343359:-	0.07	0.03	0.13	0.19	0.1	0.31	0.07	0.03	0.13	0.19	0.09	0.33	-0.12	0.95	-0.12	0.93
ENSMUSG00000052942	chr19:28665753:28666236:-@chr19:28540201:28540408:-@chr19:28530873:28531986:-	0.46	0.08	0.89	0.53	0.11	0.93	0.46	0.08	0.89	0.56	0.16	0.89	-0.07	0.98	-0.1	0.9
ENSMUSG00000048497	chr11:62648664:62648856:+@chr11:62649447:62649548:+@chr11:62660164:62662753:+	0.52	0.19	0.92	0.42	0.06	0.77	0.52	0.19	0.92	0.6	0.24	0.89	0.1	0.87	-0.08	1.01
ENSMUSG00000086968	chr3:107895643:107896213:-@chr3:107894589:107894656:-@chr3:107894051:107894228:-	0.46	0.09	0.97	0.45	0.11	0.85	0.46	0.09	0.97	0.39	0.06	0.78	0.01	1.14	0.07	0.74
ENSMUSG00000058318	chr2:92214049:92214089:+@chr2:92215449:92215575:+@chr2:92221472:92221615:+	0.8	0.66	0.91	0.89	0.71	0.98	0.8	0.66	0.91	0.59	0.38	0.78	-0.09	0.5	0.21	1.38
ENSMUSG00000036330	chr8:69088981:69089222:-@chr8:69088194:69088271:-@chr8:69077189:69077263:-	0.34	0.01	0.92	0.28	0.02	0.88	0.34	0.01	0.92	0.24	0.02	0.73	0.06	0.98	0.1	0.9
ENSMUSG00000034773	chr11:102254954:102256021:+@chr11:102257887:102257970:+@chr11:102259834:102259942:+	0.78	0.61	0.92	0.5	0.25	0.81	0.78	0.61	0.92	0.75	0.43	1	0.28	1.48	0.03	0.4
ENSMUSG00000033419	chr9:86773519:86773623:-@chr9:86769459:86769561:-@chr9:86765936:86767336:-	0.3	0.08	0.64	0.38	0.04	0.81	0.3	0.08	0.64	0.54	0.24	0.82	-0.08	0.86	-0.24	1.01
ENSMUSG00000038506	chr8:13271590:13271720:-@chr8:13258947:13259043:-@chr8:13255963:13257976:-	0.32	0.17	0.51	0.33	0.12	0.61	0.32	0.17	0.51	0.61	0.35	0.91	-0.01	0.36	-0.29	1.51
ENSMUSG00000005882	chr2:155921635:155921727:-@chr2:155910357:155911836:-@chr2:155909353:155909425:-	0.62	0.39	0.87	0.64	0.35	0.93	0.62	0.39	0.87	0.84	0.58	1	-0.02	0.62	-0.22	1.25
ENSMUSG00000078765	chr7:30563930:30563996:+@chr7:30564082:30564101:+@chr7:30564203:30564301:+	0.54	0.13	0.89	0.49	0.01	0.91	0.54	0.13	0.89	0.71	0.3	0.97	0.05	0.88	-0.17	0.99
ENSMUSG00000030769	chr7:123214866:123214997:+@chr7:123220693:123220888:+@chr7:123228909:123228991:+	0.28	0.07	0.73	0.23	0.02	0.56	0.28	0.07	0.73	0.41	0	0.93	0.05	0.57	-0.13	1.3
ENSMUSG00000037058	chr18:35598667:35598759:+@chr18:35600045:35600117:+@chr18:35610077:35610157:+	0.6	0.2	0.91	0.49	0.17	0.83	0.6	0.2	0.91	0.68	0.33	0.98	0.11	1.07	-0.08	0.8
ENSMUSG00000085936	chr13:28772619:28772666:-@chr13:28711117:28711208:-@chr13:28668370:28668704:-	0.58	0.14	1	0.34	0.02	0.8	0.58	0.14	1	0.67	0.2	0.95	0.24	1.01	-0.09	0.86
ENSMUSG00000023764	chr11:3157866:3157936:-@chr11:3156772:3156864:-@chr11:3155399:3155496:-	0.8	0.54	0.99	0.67	0.24	0.99	0.8	0.54	0.99	0.59	0.15	0.96	0.13	1.01	0.21	0.86
ENSMUSG00000040174	chr2:93984700:93984851:-@chr2:93983694:93983776:-@chr2:93981516:93981614:-	0.17	0.03	0.49	0.14	0.01	0.54	0.17	0.03	0.49	0.47	0.02	0.98	0.03	0.44	-0.3	1.43
ENSMUSG00000024426	chr17:35904290:35904335:-@chr17:35902356:35902438:-@chr17:35901983:35902054:-	0.19	0.07	0.39	0.51	0.11	0.88	0.19	0.07	0.39	0.11	0	0.39	-0.32	1.39	0.08	0.48
ENSMUSG00000039850	chr11:119491785:119491956:+@chr11:119499846:119499885:+@chr11:119500591:119500703:+	0.61	0.25	0.9	0.76	0.36	0.97	0.61	0.25	0.9	0.48	0.09	0.95	-0.15	0.7	0.13	1.17
ENSMUSG00000046367	chr1:134546884:134547183:-@chr1:134546626:134546722:-@chr1:134540945:134542165:-	0.48	0.1	0.92	0.71	0.37	0.96	0.48	0.1	0.92	0.63	0.08	0.99	-0.23	0.79	-0.15	1.07
ENSMUSG00000040265	chr1:162084033:162084144:-@chr1:162075775:162075786:-@chr1:162019828:162019992:-	0.26	0.02	0.67	0.42	0.02	0.96	0.26	0.02	0.67	0.36	0	0.92	-0.16	1.11	-0.1	0.75
ENSMUSG00000030313	chr6:149101183:149101680:-@chr6:149084871:149084936:-@chr6:149080806:149080915:-	0.67	0.31	0.94	0.7	0.27	0.95	0.67	0.31	0.94	0.63	0.14	0.99	-0.03	0.79	0.04	1.07
ENSMUSG00000064302	chr1:118545393:118545456:+@chr1:118547656:118547658:+@chr1:118547865:118548028:+	0.38	0.04	0.95	0.52	0.02	0.98	0.38	0.04	0.95	0.41	0.02	0.93	-0.14	0.83	-0.03	1.03
ENSMUSG00000034587	chr11:3452472:3452570:+@chr11:3452644:3452740:+@chr11:3456763:3458342:+	0.49	0.21	0.77	0.7	0.41	0.91	0.49	0.21	0.77	0.45	0.07	0.9	-0.21	0.84	0.04	1.02
ENSMUSG00000027200	chr2:124660705:124660761:+@chr2:124662204:124662371:+@chr2:124664021:124667770:+	0.5	0.14	0.88	0.42	0.08	0.81	0.5	0.14	0.88	0.7	0.36	0.96	0.08	0.88	-0.2	0.98
ENSMUSG00000027520	chr1:63273269:63273472:+@chr1:63275096:63275178:+@chr1:63277931:63277983:+	0.48	0.11	0.94	0.47	0.14	0.92	0.48	0.11	0.94	0.44	0.11	0.78	0.01	0.97	0.04	0.89
ENSMUSG00000066892	chr9:20644573:20644747:-@chr9:20644195:20644298:-@chr9:20642024:20642096:-	0.68	0.32	0.99	0.71	0.22	0.99	0.68	0.32	0.99	0.59	0.17	0.93	-0.03	0.87	0.09	0.99
ENSMUSG00000034739	chr9:44105405:44105515:+@chr9:44106032:44106159:+@chr9:44106243:44107971:+	0.58	0.16	0.92	0.5	0.07	0.93	0.58	0.16	0.92	0.55	0.13	0.91	0.08	1.02	0.03	0.84
ENSMUSG00000048910	chr5:143548706:143549134:+@chr5:143551409:143551541:+@chr5:143562757:143564525:+	0.23	0.14	0.33	0.22	0.12	0.36	0.23	0.14	0.33	0.09	0.03	0.19	0.01	0.19	0.14	1.67
ENSMUSG00000040998	chr3:132948047:132948147:-@chr3:132931582:132931632:-@chr3:132917461:132917553:-	0.5	0.14	0.94	0.24	0.04	0.59	0.5	0.14	0.94	0.51	0.14	0.97	0.26	0.88	-0.01	0.98
ENSMUSG00000045411	chr7:44247238:44247416:+@chr7:44247910:44248059:+@chr7:44248252:44248295:+	0.88	0.75	0.98	0.74	0.6	0.87	0.88	0.75	0.98	0.7	0.54	0.85	0.14	0.68	0.18	1.18
ENSMUSG00000030162	chr6:129507035:129507165:-@chr6:129502079:129502180:-@chr6:129488832:129488968:-	0.8	0.52	0.97	0.68	0.38	0.92	0.8	0.52	0.97	0.53	0.14	0.98	0.12	0.57	0.27	1.29
ENSMUSG00000028689	chr4:116708930:116709094:+@chr4:116709243:116709273:+@chr4:116709438:116709619:+	0.45	0.21	0.71	0.58	0.25	0.91	0.45	0.21	0.71	0.66	0.21	0.96	-0.13	0.67	-0.21	1.18
ENSMUSG00000029033	chr4:155900287:155900361:+@chr4:155901004:155901015:+@chr4:155901675:155901787:+	0.34	0	0.86	0.5	0.11	0.87	0.34	0	0.86	0.32	0.04	0.92	-0.16	0.96	0.02	0.89
ENSMUSG00000025006	chr19:40340685:40340750:-@chr19:40340045:40340146:-@chr19:40336986:40337035:-	0.55	0.18	0.93	0.42	0.11	0.82	0.55	0.18	0.93	0.76	0.31	0.98	0.13	0.8	-0.21	1.05
ENSMUSG00000016624	chr15:84795080:84795134:-@chr15:84793896:84793918:-@chr15:84791783:84791941:-	0.54	0.21	0.9	0.42	0.04	0.82	0.54	0.21	0.9	0.44	0.04	0.84	0.12	0.9	0.1	0.95
ENSMUSG00000024505	chr18:49728369:49728459:-@chr18:49724113:49724207:-@chr18:49700259:49700387:-	0.53	0.33	0.78	0.34	0.08	0.79	0.53	0.33	0.78	0.49	0.13	0.92	0.19	0.91	0.04	0.94
ENSMUSG00000006476	chr2:25054998:25055059:+@chr2:25055636:25056136:+@chr2:25057101:25057176:+	0.85	0.55	0.99	0.77	0.45	0.97	0.85	0.55	0.99	0.59	0.29	0.87	0.08	0.49	0.26	1.36
ENSMUSG00000097636	chr19:53451413:53451503:-@chr19:53449275:53451192:-@chr19:53447156:53447313:-	0.52	0.15	0.89	0.24	0.08	0.57	0.52	0.15	0.89	0.43	0.16	0.84	0.28	1.09	0.09	0.76
ENSMUSG00000028530	chr4:101265042:101265282:-@chr4:101198869:101198914:-@chr4:101197776:101197980:-	0.31	0.02	0.81	0.3	0.03	0.68	0.31	0.02	0.81	0.31	0.01	0.9	0.01	0.7	0	1.15
ENSMUSG00000049811	chr11:23020000:23021133:+@chr11:23021494:23021661:+@chr11:23023430:23023741:+	0.61	0.34	0.87	0.37	0.05	0.72	0.61	0.34	0.87	0.65	0.2	0.97	0.24	1.15	-0.04	0.7
NA	chr15:83089506:83089765:+@chr15:83097099:83097191:+@chr15:83101644:83101793:+	0.3	0.01	0.85	0.41	0.03	0.93	0.3	0.01	0.85	0.3	0.02	0.76	-0.11	0.92	0	0.92
ENSMUSG00000030990	chr7:102210453:102210591:+@chr7:102222782:102222801:+@chr7:102223379:102223490:+	0.46	0.11	0.88	0.44	0.07	0.86	0.46	0.11	0.88	0.55	0.06	0.96	0.02	0.91	-0.09	0.93
ENSMUSG00000024515	chr18:73662658:73662867:-@chr18:73657195:73657245:-@chr18:73649726:73649909:-	0.7	0.48	0.92	0.8	0.54	0.98	0.7	0.48	0.92	0.91	0.75	1	-0.1	0.58	-0.21	1.26
ENSMUSG00000031290	chrX:147503384:147503491:-@chrX:147496767:147496832:-@chrX:147492039:147492087:-	0.58	0.27	0.92	0.51	0.21	0.84	0.58	0.27	0.92	0.8	0.42	0.98	0.07	0.82	-0.22	1.02
ENSMUSG00000079685	chr10:7473254:7473477:-@chr10:7456954:7457069:-@chr10:7456340:7456615:-	0.49	0.16	0.85	0.75	0.47	0.95	0.49	0.16	0.85	0.33	0.12	0.7	-0.26	1.15	0.16	0.69
ENSMUSG00000078247	chr17:12741311:12741424:+@chr17:12798359:12798439:+@chr17:12829825:12830123:+	0.39	0.07	0.88	0.39	0.08	0.73	0.39	0.07	0.88	0.37	0.03	0.92	0	0.94	0.02	0.9
ENSMUSG00000004151	chr12:38827778:38827907:+@chr12:38831081:38831259:+@chr12:38835069:38835316:+	0.95	0.88	1	0.81	0.66	0.93	0.95	0.88	1	0.8	0.55	0.96	0.14	1.2	0.15	0.64
ENSMUSG00000079036	chr12:87443642:87443839:-@chr12:87441643:87441780:-@chr12:87440306:87440414:-	0.48	0.34	0.62	0.66	0.49	0.85	0.48	0.34	0.62	0.68	0.47	0.9	-0.18	0.82	-0.2	1.01
ENSMUSG00000028621	chr4:107068612:107068823:+@chr4:107069096:107069196:+@chr4:107070870:107071018:+	0.11	0.01	0.31	0.29	0.08	0.6	0.11	0.01	0.31	0.29	0.05	0.57	-0.18	0.79	-0.18	1.04
ENSMUSG00000029673	chr5:131472259:131472479:-@chr5:131470414:131470458:-@chr5:131466032:131466127:-	0.59	0.32	0.87	0.57	0.09	0.95	0.59	0.32	0.87	0.81	0.47	0.99	0.02	0.98	-0.22	0.85
ENSMUSG00000062609	chr16:95258202:95258374:+@chr16:95291811:95291908:+@chr16:95295591:95300258:+	0.39	0.06	0.85	0.34	0.02	0.8	0.39	0.06	0.85	0.55	0.05	0.93	0.05	0.83	-0.16	1
ENSMUSG00000024236	chr18:5048885:5049494:+@chr18:5054018:5054098:+@chr18:5055980:5056849:+	0.54	0.23	0.86	0.6	0.23	0.87	0.54	0.23	0.86	0.26	0	0.79	-0.06	0.66	0.28	1.17
ENSMUSG00000033004	chr14:103172567:103172689:-@chr14:103169857:103170012:-@chr14:103155124:103156767:-	0.39	0.27	0.51	0.2	0.09	0.37	0.39	0.27	0.51	0.29	0.16	0.46	0.19	1.35	0.1	0.48
ENSMUSG00000015755	chr10:7955801:7956123:-@chr10:7933068:7933208:-@chr10:7924685:7924872:-	0.2	0.1	0.34	0.22	0.11	0.37	0.2	0.1	0.34	0.4	0.23	0.59	-0.02	0.24	-0.2	1.58
ENSMUSG00000022744	chr16:58731302:58731412:+@chr16:58732581:58732718:+@chr16:58732839:58734247:+	0.71	0.57	0.86	0.89	0.74	0.97	0.71	0.57	0.86	0.72	0.57	0.87	-0.18	1.54	-0.01	0.28
ENSMUSG00000090086,ENSMUSG00000097213	chr5:123137955:123138066:-@chr5:123134624:123134717:-@chr5:123133723:123134430:-	0.25	0.06	0.75	0.1	0	0.28	0.25	0.06	0.75	0.49	0.2	0.89	0.15	0.53	-0.24	1.29
ENSMUSG00000023284	chr5:110111897:110112066:+@chr5:110118419:110118550:+@chr5:110123760:110123880:+	0.62	0.43	0.83	0.7	0.35	0.97	0.62	0.43	0.83	0.38	0.2	0.59	-0.08	0.71	0.24	1.11
ENSMUSG00000026135	chr1:74585384:74585697:-@chr1:74579325:74579618:-@chr1:74578123:74578287:-	0.77	0.61	0.91	0.51	0.27	0.85	0.77	0.61	0.91	0.73	0.44	0.95	0.26	1.37	0.04	0.45
ENSMUSG00000021843	chr14:47704187:47704277:+@chr14:47704420:47704488:+@chr14:47705763:47705800:+	0.75	0.63	0.87	0.9	0.76	0.99	0.75	0.63	0.87	0.91	0.76	0.99	-0.15	0.86	-0.16	0.96
ENSMUSG00000029016	chr4:148017903:148018016:-@chr4:148017496:148017662:-@chr4:148016852:148016978:-	0.61	0.43	0.82	0.57	0.38	0.77	0.61	0.43	0.82	0.84	0.57	0.99	0.04	0.38	-0.23	1.44
ENSMUSG00000066500	chr7:44710511:44710531:+@chr7:44712998:44713078:+@chr7:44715328:44715451:+	0.56	0.11	0.96	0.58	0.26	0.93	0.56	0.11	0.96	0.5	0.05	0.93	-0.02	0.84	0.06	0.98
ENSMUSG00000040387	chr4:24682055:24682270:-@chr4:24649540:24650266:-@chr4:24632643:24632701:-	0.79	0.46	0.99	0.61	0.21	0.96	0.79	0.46	0.99	0.65	0.23	0.97	0.18	1.19	0.14	0.63
ENSMUSG00000039835	chr10:18511550:18511742:+@chr10:18516029:18516160:+@chr10:18523791:18527042:+	0.59	0.41	0.75	0.83	0.56	0.99	0.59	0.41	0.75	0.68	0.42	0.9	-0.24	1.28	-0.09	0.53
ENSMUSG00000035601	chr4:45297168:45297195:+@chr4:45299747:45299897:+@chr4:45300417:45300627:+	0.07	0.01	0.15	0.2	0.08	0.41	0.07	0.01	0.15	0.26	0.1	0.51	-0.13	0.51	-0.19	1.3
ENSMUSG00000073096	chr6:48554799:48554893:+@chr6:48556955:48557094:+@chr6:48568137:48570722:+	0.54	0.29	0.81	0.62	0.31	0.94	0.54	0.29	0.81	0.78	0.43	0.98	-0.08	0.75	-0.24	1.06
ENSMUSG00000006498	chr10:79854605:79854721:+@chr10:79856339:79856534:+@chr10:79858752:79858824:+	0.79	0.7	0.87	0.93	0.82	0.99	0.79	0.7	0.87	0.87	0.73	0.98	-0.14	1.5	-0.08	0.31
ENSMUSG00000022159	chr14:52275443:52275510:-@chr14:52268918:52268956:-@chr14:52268642:52268734:-	0.6	0.23	0.88	0.71	0.41	0.95	0.6	0.23	0.88	0.51	0.12	0.87	-0.11	0.87	0.09	0.94
ENSMUSG00000036452	chr18:39306702:39306852:+@chr18:39357553:39357828:+@chr18:39363117:39363208:+	0.64	0.15	0.97	0.63	0.26	0.97	0.64	0.15	0.97	0.67	0.2	0.98	0.01	1.08	-0.03	0.73
NA	chr17:36084160:36084249:-@chr17:36083696:36083939:-@chr17:36081242:36081517:-	0.56	0.12	0.93	0.46	0.14	0.89	0.56	0.12	0.93	0.68	0.22	0.95	0.1	0.87	-0.12	0.94
ENSMUSG00000004630	chr8:3624508:3624632:-@chr8:3623696:3623754:-@chr8:3623371:3623558:-	0.45	0.07	0.93	0.52	0.1	0.97	0.45	0.07	0.93	0.36	0	0.87	-0.07	1.08	0.09	0.73
ENSMUSG00000022667	chr16:44765736:44766072:+@chr16:44785210:44785503:+@chr16:44788746:44788808:+	0.46	0.13	0.77	0.45	0.08	0.9	0.46	0.13	0.77	0.45	0.04	0.94	0.01	1	0.01	0.81
NA	chr11:54962833:54962940:-@chr11:54940711:54940882:-@chr11:54939598:54939735:-	0.82	0.68	0.91	0.94	0.8	1	0.82	0.68	0.91	0.61	0.4	0.82	-0.12	0.61	0.21	1.2
ENSMUSG00000020687	chr11:104522723:104522822:-@chr11:104521381:104521588:-@chr11:104520664:104520836:-	0.97	0.92	0.99	0.9	0.78	0.98	0.97	0.92	0.99	0.85	0.73	0.94	0.07	0.33	0.12	1.48
ENSMUSG00000026927	chr2:26389149:26389316:-@chr2:26388916:26389065:-@chr2:26388492:26388560:-	0.35	0.16	0.59	0.29	0.09	0.55	0.35	0.16	0.59	0.12	0.04	0.25	0.06	0.45	0.23	1.36
ENSMUSG00000008489	chr4:91260761:91260986:-@chr4:91254141:91254179:-@chr4:91250767:91253570:-	0.4	0.18	0.74	0.27	0.03	0.69	0.4	0.18	0.74	0.24	0.02	0.79	0.13	0.92	0.16	0.89
ENSMUSG00000085396	chrX:50564813:50564967:-@chrX:50562680:50562954:-@chrX:50558231:50558384:-	0.88	0.75	0.98	0.66	0.42	0.86	0.88	0.75	0.98	0.77	0.56	0.93	0.22	1.32	0.11	0.49
ENSMUSG00000041609	chr5:115662700:115662918:-@chr5:115661375:115661518:-@chr5:115655901:115656031:-	0.5	0.37	0.64	0.73	0.49	0.95	0.5	0.37	0.64	0.5	0.19	0.89	-0.23	1.28	0	0.52
ENSMUSG00000036940	chr4:136592965:136593130:-@chr4:136582040:136582099:-@chr4:136577071:136577204:-	0.4	0.35	0.45	0.47	0.39	0.56	0.4	0.35	0.45	0.52	0.43	0.6	-0.07	0.34	-0.12	1.46
ENSMUSG00000042371	chr11:61709591:61709696:-@chr11:61709279:61709359:-@chr11:61707794:61707999:-	0.52	0.14	0.92	0.59	0.14	0.89	0.52	0.14	0.92	0.58	0.1	0.96	-0.07	0.78	-0.06	1.02
ENSMUSG00000000823	chr2:181590860:181590985:-@chr2:181590470:181590612:-@chr2:181590053:181590181:-	0.74	0.61	0.87	0.91	0.77	0.98	0.74	0.61	0.87	0.63	0.42	0.83	-0.17	1.31	0.11	0.49
ENSMUSG00000032652	chr6:134849103:134849300:+@chr6:134851080:134851224:+@chr6:134852278:134852314:+	0.64	0.32	0.94	0.59	0.27	0.93	0.64	0.32	0.94	0.58	0.18	1	0.05	1	0.06	0.8
ENSMUSG00000074165	chr7:41634680:41634710:+@chr7:41643333:41643432:+@chr7:41647491:41647617:+	0.54	0.16	0.96	0.42	0.06	0.93	0.54	0.16	0.96	0.5	0.19	0.9	0.12	1.01	0.04	0.79
NA	chr13:21833743:21834147:+@chr13:21835301:21835392:+@chr13:21835815:21837530:+	0.52	0.16	0.95	0.46	0.17	0.8	0.52	0.16	0.95	0.35	0.02	0.76	0.06	0.8	0.17	1
ENSMUSG00000041594	chr14:122944674:122944838:-@chr14:122943155:122943357:-@chr14:122941815:122941986:-	0.82	0.59	0.97	0.86	0.64	0.96	0.82	0.59	0.97	0.54	0.3	0.83	-0.04	0.28	0.28	1.52
ENSMUSG00000046449	chrX:104200633:104201117:-@chrX:104099626:104099681:-@chrX:104088881:104089006:-	0.76	0.53	0.95	0.77	0.39	0.98	0.76	0.53	0.95	0.47	0.14	0.8	-0.01	0.52	0.29	1.28
ENSMUSG00000032258	chr9:83440909:83441099:-@chr9:83428880:83428948:-@chr9:83426593:83426961:-	0.46	0.11	0.89	0.39	0.08	0.87	0.46	0.11	0.89	0.6	0.19	0.94	0.07	0.61	-0.14	1.19
ENSMUSG00000025420	chr18:77047174:77047296:-@chr18:77011990:77012104:-@chr18:77010947:77011045:-	0.68	0.28	0.98	0.63	0.16	0.97	0.68	0.28	0.98	0.56	0.14	0.89	0.05	0.86	0.12	0.94
ENSMUSG00000063889	chr18:3299450:3299556:-@chr18:3299162:3299308:-@chr18:3295322:3295416:-	0.71	0.41	0.93	0.51	0.14	0.94	0.71	0.41	0.93	0.73	0.39	0.97	0.2	1.21	-0.02	0.59
NA	chr6:108065045:108065239:+@chr6:108072967:108073119:+@chr6:108075706:108077127:+	0.03	0	0.09	0.28	0.06	0.62	0.03	0	0.09	0.12	0.03	0.32	-0.25	1.47	-0.09	0.32
ENSMUSG00000087132	chr19:4444003:4444038:+@chr19:4447297:4447426:+@chr19:4447525:4448325:+	0.42	0.02	0.83	0.42	0.09	0.93	0.42	0.02	0.83	0.7	0.35	0.92	0	0.71	-0.28	1.08
ENSMUSG00000027865	chr3:100162518:100162665:+@chr3:100168940:100169085:+@chr3:100169936:100170175:+	0.06	0.02	0.15	0.26	0.09	0.49	0.06	0.02	0.15	0.13	0.01	0.39	-0.2	1.56	-0.07	0.23
ENSMUSG00000028923	chr4:141072529:141072637:-@chr4:141071581:141071695:-@chr4:141070855:141070940:-	0.28	0.08	0.51	0.55	0.24	0.91	0.28	0.08	0.51	0.25	0.05	0.77	-0.27	1.33	0.03	0.46
ENSMUSG00000028760	chr4:138082893:138082988:+@chr4:138087533:138087565:+@chr4:138095909:138095929:+	0.55	0.22	0.87	0.8	0.42	0.98	0.55	0.22	0.87	0.53	0.11	0.9	-0.25	1.03	0.02	0.76
ENSMUSG00000026981	chr2:24347466:24347554:+@chr2:24348516:24348628:+@chr2:24349415:24351491:+	0.45	0.11	0.85	0.64	0.15	0.96	0.45	0.11	0.85	0.48	0.03	0.86	-0.19	1.03	-0.03	0.76
ENSMUSG00000026730	chr2:12924041:12924198:+@chr2:12974369:12974453:+@chr2:12978160:12978617:+	0.66	0.35	0.96	0.66	0.27	0.93	0.66	0.35	0.96	0.87	0.67	0.98	0	0.56	-0.21	1.23
ENSMUSG00000068329	chr6:83053038:83053070:-@chr6:83052698:83052726:-@chr6:83052473:83052542:-	0.52	0.27	0.79	0.75	0.42	0.96	0.52	0.27	0.79	0.46	0.13	0.87	-0.23	1.13	0.06	0.66
ENSMUSG00000021185	chr12:100779123:100779310:+@chr12:100787616:100787672:+@chr12:100829599:100829725:+	0.41	0.06	0.84	0.56	0.17	0.88	0.41	0.06	0.84	0.3	0.04	0.78	-0.15	1.05	0.11	0.74
ENSMUSG00000038677	chr17:28165427:28165642:+@chr17:28165987:28166148:+@chr17:28166357:28166524:+	0.39	0.13	0.7	0.56	0.15	0.95	0.39	0.13	0.7	0.18	0.02	0.48	-0.17	0.84	0.21	0.95
NA	chr10:5031766:5031858:-@chr10:5030376:5030434:-@chr10:5020196:5022247:-	0.68	0.32	0.97	0.76	0.35	0.97	0.68	0.32	0.97	0.55	0.19	0.91	-0.08	0.75	0.13	1.04
ENSMUSG00000067629	chr17:26966883:26966973:+@chr17:26970343:26970350:+@chr17:26970499:26970645:+	0.45	0.06	0.92	0.44	0.05	0.89	0.45	0.06	0.92	0.38	0.03	0.88	0.01	0.87	0.07	0.92
ENSMUSG00000033287	chr15:78436901:78436994:+@chr15:78437158:78437232:+@chr15:78437584:78437671:+	0.45	0.14	0.95	0.44	0.04	0.9	0.45	0.14	0.95	0.3	0.04	0.86	0.01	0.76	0.15	1.03
ENSMUSG00000079424	chr5:95340184:95340477:+@chr5:95340969:95341559:+@chr5:95342371:95343917:+	0.47	0.15	0.91	0.41	0.03	0.87	0.47	0.15	0.91	0.34	0.02	0.85	0.06	0.87	0.13	0.92
ENSMUSG00000028785	chr4:129121570:129121740:-@chr4:129121222:129121302:-@chr4:129118364:129118762:-	0.43	0.05	0.96	0.24	0.01	0.8	0.43	0.05	0.96	0.39	0.02	0.82	0.19	0.92	0.04	0.87
ENSMUSG00000026179	chr1:74285842:74286010:+@chr1:74287092:74287208:+@chr1:74347385:74347500:+	0.91	0.84	0.96	0.76	0.61	0.88	0.91	0.84	0.96	0.8	0.67	0.92	0.15	1.26	0.11	0.53
ENSMUSG00000073406	chr17:36083696:36083965:-@chr17:36083233:36083434:-@chr17:36081242:36081517:-	0.86	0.63	0.99	0.56	0.15	0.95	0.86	0.63	0.99	0.82	0.5	0.99	0.3	1.36	0.04	0.43
ENSMUSG00000037773	chr2:130422813:130422892:-@chr2:130422466:130422704:-@chr2:130422225:130422375:-	0.81	0.64	0.94	0.78	0.45	0.96	0.81	0.64	0.94	0.47	0.2	0.85	0.03	0.35	0.34	1.44
ENSMUSG00000031139	chrX:60120940:60121111:-@chrX:60119089:60119136:-@chrX:60115103:60115146:-	0.09	0.03	0.17	0.28	0.11	0.52	0.09	0.03	0.17	0.23	0.08	0.42	-0.19	1.12	-0.14	0.66
ENSMUSG00000002342	chr8:70172411:70172440:+@chr8:70174303:70174406:+@chr8:70176845:70176925:+	0.47	0.3	0.65	0.69	0.45	0.9	0.47	0.3	0.65	0.64	0.31	0.94	-0.22	1.03	-0.17	0.75
ENSMUSG00000031644	chr8:61049784:61049947:+@chr8:61050028:61050159:+@chr8:61054520:61054622:+	0.17	0.09	0.26	0.26	0.11	0.46	0.17	0.09	0.26	0.39	0.18	0.67	-0.09	0.34	-0.22	1.44
ENSMUSG00000086968	chr3:107895643:107896213:-@chr3:107894861:107894992:-@chr3:107894051:107894215:-	0.26	0.04	0.75	0.44	0.05	0.93	0.26	0.04	0.75	0.36	0.03	0.88	-0.18	0.81	-0.1	0.97
ENSMUSG00000055897	chr2:173659323:173659367:-@chr2:173615483:173615576:-@chr2:173608733:173608879:-	0.6	0.29	0.9	0.66	0.2	0.98	0.6	0.29	0.9	0.81	0.52	0.99	-0.06	0.87	-0.21	0.91
ENSMUSG00000024430	chr18:12750660:12751828:+@chr18:12754344:12754463:+@chr18:12755064:12755142:+	0.57	0.12	0.95	0.72	0.27	0.97	0.57	0.12	0.95	0.63	0.17	0.96	-0.15	0.8	-0.06	0.98
ENSMUSG00000052384	chr16:32165332:32165482:-@chr16:32147553:32147673:-@chr16:32142825:32145005:-	0.4	0.03	0.86	0.38	0.04	0.83	0.4	0.03	0.86	0.55	0.17	0.93	0.02	0.74	-0.15	1.04
ENSMUSG00000057375	chr4:107345009:107345191:+@chr4:107350414:107350538:+@chr4:107359607:107359823:+	0.98	0.94	1	0.88	0.78	0.96	0.98	0.94	1	0.92	0.81	0.99	0.1	1.54	0.06	0.24
ENSMUSG00000001089	chr4:136521341:136521443:+@chr4:136539125:136539216:+@chr4:136540356:136543518:+	0.37	0.26	0.52	0.21	0.11	0.35	0.37	0.26	0.52	0.33	0.22	0.47	0.16	1.5	0.04	0.28
ENSMUSG00000033728	chr15:76710660:76710927:+@chr15:76711422:76711530:+@chr15:76712867:76713220:+	0.74	0.51	0.91	0.5	0.28	0.74	0.74	0.51	0.91	0.72	0.51	0.9	0.24	1.37	0.02	0.41
ENSMUSG00000026113	chr1:37379922:37380060:+@chr1:37383339:37383371:+@chr1:37387698:37387870:+	0.75	0.41	0.99	0.59	0.15	0.95	0.75	0.41	0.99	0.55	0.14	0.99	0.16	0.8	0.2	0.98
ENSMUSG00000045095	chr6:93773607:93773689:-@chr6:93769508:93769543:-@chr6:93760708:93760765:-	0.55	0.36	0.74	0.76	0.55	0.93	0.55	0.36	0.74	0.72	0.47	0.94	-0.21	1.02	-0.17	0.75
ENSMUSG00000022401	chr15:81414432:81414548:+@chr15:81415903:81415994:+@chr15:81427276:81427683:+	0.04	0	0.12	0.18	0.03	0.52	0.04	0	0.12	0.27	0.09	0.52	-0.14	0.39	-0.23	1.38
ENSMUSG00000003363	chr7:27552998:27553112:-@chr7:27545188:27545285:-@chr7:27542744:27542904:-	0.58	0.32	0.85	0.72	0.47	0.94	0.58	0.32	0.85	0.81	0.5	0.99	-0.14	0.6	-0.23	1.17
ENSMUSG00000068250	chr6:149188606:149188712:-@chr6:149184992:149185124:-@chr6:149183394:149183538:-	0.63	0.4	0.85	0.83	0.6	0.97	0.63	0.4	0.85	0.79	0.52	0.99	-0.2	1.03	-0.16	0.74
ENSMUSG00000001768	chr2:145822265:145822365:+@chr2:145822610:145822761:+@chr2:145844711:145844903:+	0.41	0.14	0.84	0.59	0.25	0.94	0.41	0.14	0.84	0.53	0.22	0.83	-0.18	1.08	-0.12	0.69
ENSMUSG00000032373	chr9:66753695:66753821:+@chr9:66762403:66762432:+@chr9:66763247:66763334:+	0.38	0.15	0.66	0.54	0.11	0.88	0.38	0.15	0.66	0.47	0.05	0.94	-0.16	0.87	-0.09	0.9
ENSMUSG00000015501	chr10:13966379:13966697:+@chr10:14004201:14004275:+@chr10:14066583:14066684:+	0.57	0.13	0.97	0.65	0.13	0.95	0.57	0.13	0.97	0.73	0.32	0.98	-0.08	0.91	-0.16	0.86
ENSMUSG00000056917	chr19:5663604:5663707:-@chr19:5662588:5662841:-@chr19:5661596:5661626:-	0.43	0.19	0.81	0.37	0.15	0.71	0.43	0.19	0.81	0.73	0.37	0.99	0.06	0.51	-0.3	1.26
ENSMUSG00000058835	chr2:22971083:22971259:-@chr2:22963214:22963228:-@chr2:22962401:22962501:-	0.07	0.03	0.14	0.1	0.04	0.18	0.07	0.03	0.14	0.18	0.11	0.26	-0.03	0.13	-0.11	1.64
ENSMUSG00000074604	chr3:51664511:51664610:+@chr3:51677565:51677635:+@chr3:51681797:51681878:+	0.61	0.24	0.93	0.64	0.21	0.97	0.61	0.24	0.93	0.59	0.24	0.91	-0.03	1.01	0.02	0.76
ENSMUSG00000022387	chr15:88700773:88701270:-@chr15:88696361:88696674:-@chr15:88691749:88691884:-	0.05	0.03	0.08	0.07	0.03	0.14	0.05	0.03	0.08	0.01	0	0.03	-0.02	0.08	0.04	1.69
ENSMUSG00000027523	chr2:174284604:174285477:+@chr2:174288491:174288586:+@chr2:174334212:174334284:+	0.31	0.17	0.48	0.12	0.01	0.38	0.31	0.17	0.48	0.21	0.03	0.62	0.19	1.1	0.1	0.67
ENSMUSG00000079410	chr14:3066066:3066228:+@chr14:3070096:3070258:+@chr14:3071209:3071340:+	0.83	0.66	0.95	0.75	0.5	0.97	0.83	0.66	0.95	0.55	0.24	0.86	0.08	0.43	0.28	1.34
NA	chr17:57103350:57103484:-@chr17:57102055:57102153:-@chr17:57092023:57092769:-	0.64	0.15	0.96	0.56	0.13	0.94	0.64	0.15	0.96	0.55	0.2	0.87	0.08	0.68	0.09	1.08
NA	chr11:90187683:90188235:+@chr11:90208984:90209046:+@chr11:90248805:90249735:+	0.34	0.08	0.69	0.39	0.01	0.71	0.34	0.08	0.69	0.43	0.03	0.92	-0.05	0.73	-0.09	1.03
NA	chr16:36221562:36221646:+@chr16:36238824:36238885:+@chr16:36253014:36253111:+	0.45	0.07	0.81	0.5	0.07	0.88	0.45	0.07	0.81	0.54	0.04	0.91	-0.05	0.69	-0.09	1.07
ENSMUSG00000002871	chr6:88910151:88910261:+@chr6:88910548:88910648:+@chr6:88910797:88910877:+	0.55	0.24	0.9	0.47	0.15	0.9	0.55	0.24	0.9	0.71	0.38	0.93	0.08	0.88	-0.16	0.88
ENSMUSG00000023984	chr17:47618809:47619062:+@chr17:47649950:47650023:+@chr17:47672044:47673418:+	0.64	0.34	0.9	0.63	0.22	0.94	0.64	0.34	0.9	0.69	0.21	0.99	0.01	0.71	-0.05	1.05
ENSMUSG00000000631	chr11:77801302:77801380:+@chr11:77815856:77815891:+@chr11:77817619:77817706:+	0.42	0.02	0.89	0.37	0.06	0.86	0.42	0.02	0.89	0.44	0.06	0.89	0.05	1.02	-0.02	0.74
ENSMUSG00000024238	chr18:5593308:5593919:+@chr18:5641382:5641518:+@chr18:5705043:5705243:+	0.61	0.21	0.97	0.6	0.23	0.97	0.61	0.21	0.97	0.4	0.08	0.88	0.01	0.81	0.21	0.95
ENSMUSG00000026586	chr1:163257761:163257942:-@chr1:163253977:163254048:-@chr1:163245119:163248396:-	0.63	0.52	0.76	0.53	0.37	0.68	0.63	0.52	0.76	0.47	0.35	0.59	0.1	0.42	0.16	1.34
ENSMUSG00000044349	chr2:158376081:158376326:+@chr2:158376745:158376824:+@chr2:158376994:158377072:+	0.46	0.22	0.75	0.2	0.03	0.53	0.46	0.22	0.75	0.38	0.1	0.81	0.26	1.02	0.08	0.74
ENSMUSG00000024845	chr19:4127550:4127639:+@chr19:4131031:4131075:+@chr19:4131229:4131282:+	0.78	0.47	0.95	0.49	0.18	0.83	0.78	0.47	0.95	0.72	0.46	0.91	0.29	1.3	0.06	0.46
ENSMUSG00000015522	chr3:95460377:95460421:+@chr3:95466793:95466837:+@chr3:95470177:95470390:+	0.7	0.62	0.78	0.84	0.73	0.93	0.7	0.62	0.78	0.82	0.71	0.91	-0.14	1.14	-0.12	0.62
ENSMUSG00000035640	chr10:80136874:80136938:-@chr10:80136690:80136743:-@chr10:80136350:80136494:-	0.59	0.2	0.92	0.32	0.02	0.77	0.59	0.2	0.92	0.61	0.29	0.92	0.27	1.13	-0.02	0.63
ENSMUSG00000097333,ENSMUSG00000097565	chr13:67520626:67520721:-@chr13:67519166:67519220:-@chr13:67515782:67518112:-	0.06	0.01	0.16	0.35	0.09	0.86	0.06	0.01	0.16	0.16	0.02	0.38	-0.29	1.41	-0.1	0.34
ENSMUSG00000035969	chr4:43383449:43383759:+@chr4:43413005:43413054:+@chr4:43414628:43416718:+	0.28	0.02	0.67	0.48	0.11	0.9	0.28	0.02	0.67	0.41	0.13	0.78	-0.2	1.03	-0.13	0.72
ENSMUSG00000056069	chr15:27658045:27658314:-@chr15:27657176:27657263:-@chr15:27655071:27657071:-	0.22	0.01	0.76	0.5	0.09	0.85	0.22	0.01	0.76	0.25	0.01	0.72	-0.28	1.07	-0.03	0.68
ENSMUSG00000024050	chr17:32381084:32381156:-@chr17:32378840:32379118:-@chr17:32376178:32378498:-	0.44	0.15	0.76	0.63	0.31	0.97	0.44	0.15	0.76	0.55	0.18	0.96	-0.19	0.84	-0.11	0.91
ENSMUSG00000085642	chr12:20920842:20921262:-@chr12:20914759:20914841:-@chr12:20875640:20877095:-	0.44	0.16	0.85	0.39	0.12	0.78	0.44	0.16	0.85	0.75	0.42	0.97	0.05	0.67	-0.31	1.08
ENSMUSG00000036986	chr9:58229355:58229407:-@chr9:58221715:58221865:-@chr9:58218086:58220564:-	0.66	0.55	0.77	0.86	0.69	0.99	0.66	0.55	0.77	0.71	0.53	0.93	-0.2	1.44	-0.05	0.31
ENSMUSG00000086368	chr5:115301120:115301233:+@chr5:115310485:115310642:+@chr5:115317472:115319208:+	0.56	0.16	0.93	0.56	0.05	0.96	0.56	0.16	0.93	0.74	0.32	0.97	0	0.8	-0.18	0.95
ENSMUSG00000008575	chr4:82320474:82320556:-@chr4:82310303:82310391:-@chr4:82290173:82296811:-	0.31	0.11	0.58	0.24	0.03	0.57	0.31	0.11	0.58	0.52	0.2	0.89	0.07	0.75	-0.21	1
NA	chr3:55516873:55516986:+@chr3:55521850:55521923:+@chr3:55533570:55539068:+	0.26	0.01	0.59	0.32	0.01	0.82	0.26	0.01	0.59	0.31	0.05	0.67	-0.06	0.87	-0.05	0.88
ENSMUSG00000086968	chr3:107895643:107896213:-@chr3:107894589:107894656:-@chr3:107894051:107894215:-	0.4	0.04	0.84	0.42	0.03	0.98	0.4	0.04	0.84	0.48	0.1	0.88	-0.02	0.95	-0.08	0.8
ENSMUSG00000058444	chr9:63235289:63235318:-@chr9:63217339:63217365:-@chr9:63216993:63217025:-	0.52	0.12	0.94	0.56	0.19	0.91	0.52	0.12	0.94	0.47	0.06	0.91	-0.04	0.84	0.05	0.91
ENSMUSG00000053367	chr7:6263907:6263933:+@chr7:6266289:6266345:+@chr7:6266830:6266847:+	0.46	0.04	0.89	0.48	0.07	0.93	0.46	0.04	0.89	0.41	0.09	0.8	-0.02	1.08	0.05	0.67
ENSMUSG00000023206	chr2:11718264:11718458:+@chr2:11730571:11730646:+@chr2:11733150:11733962:+	0.59	0.14	0.97	0.54	0.05	0.96	0.59	0.14	0.97	0.58	0.08	0.92	0.05	0.93	0.01	0.82
ENSMUSG00000040387	chr4:24682055:24682270:-@chr4:24649540:24650262:-@chr4:24632643:24632701:-	0.75	0.37	1	0.52	0.12	0.92	0.75	0.37	1	0.77	0.38	0.99	0.23	1.12	-0.02	0.63
ENSMUSG00000005267	chr11:62724797:62724883:-@chr11:62713665:62715376:-@chr11:62712150:62712219:-	0.77	0.41	0.96	0.54	0.21	0.87	0.77	0.41	0.96	0.69	0.32	0.99	0.23	1.12	0.08	0.63
ENSMUSG00000046110	chr2:121454944:121455037:-@chr2:121453998:121454209:-@chr2:121453096:121453168:-	0.72	0.26	0.99	0.63	0.19	0.97	0.72	0.26	0.99	0.48	0.06	0.86	0.09	0.65	0.24	1.1
ENSMUSG00000080316	chr17:17837509:17837586:+@chr17:17837665:17837771:+@chr17:17838087:17838243:+	0.49	0.22	0.77	0.56	0.25	0.91	0.49	0.22	0.77	0.74	0.36	0.98	-0.07	0.68	-0.25	1.06
ENSMUSG00000025969	chr1:62786281:62786301:+@chr1:62812534:62812584:+@chr1:62815333:62818692:+	0.69	0.39	0.98	0.72	0.31	0.97	0.69	0.39	0.98	0.52	0.15	0.87	-0.03	0.81	0.17	0.93
ENSMUSG00000000326	chr16:18426356:18426716:-@chr16:18424304:18424360:-@chr16:18411690:18411957:-	0.59	0.39	0.8	0.81	0.58	0.96	0.59	0.39	0.8	0.73	0.55	0.89	-0.22	1.18	-0.14	0.56
NA	chr7:127421405:127421518:-@chr7:127420010:127420105:-@chr7:127418966:127419641:-	0.33	0.19	0.5	0.56	0.34	0.77	0.33	0.19	0.5	0.44	0.23	0.66	-0.23	1.21	-0.11	0.53
ENSMUSG00000023206	chr2:11718264:11718458:+@chr2:11720013:11720105:+@chr2:11724096:11724128:+	0.55	0.17	0.9	0.75	0.39	0.98	0.55	0.17	0.9	0.55	0.09	0.93	-0.2	0.92	0	0.82
ENSMUSG00000001833	chr9:25252439:25252699:+@chr9:25265302:25265306:+@chr9:25265394:25265496:+	0.34	0.08	0.87	0.49	0.03	0.91	0.34	0.08	0.87	0.3	0.04	0.73	-0.15	1.01	0.04	0.73
NA	chr1:36558016:36558381:-@chr1:36556803:36556929:-@chr1:36555932:36556077:-	0.56	0.13	0.98	0.61	0.18	0.97	0.56	0.13	0.98	0.59	0.21	0.96	-0.05	0.9	-0.03	0.84
ENSMUSG00000030492	chr7:35449750:35449886:+@chr7:35452369:35452516:+@chr7:35453394:35453636:+	0.56	0.21	0.91	0.4	0.13	0.8	0.56	0.21	0.91	0.7	0.33	0.98	0.16	0.8	-0.14	0.94
ENSMUSG00000035208	chr11:83016653:83017722:-@chr11:83013365:83013499:-@chr11:83004057:83004780:-	0.73	0.44	0.97	0.46	0.08	0.88	0.73	0.44	0.97	0.73	0.35	0.99	0.27	0.97	0	0.77
ENSMUSG00000064284	chr15:85811639:85811697:-@chr15:85810902:85811048:-@chr15:85809212:85809324:-	0.84	0.7	0.94	0.68	0.48	0.84	0.84	0.7	0.94	0.66	0.44	0.9	0.16	0.85	0.18	0.89
ENSMUSG00000097039	chr15:62107148:62107465:+@chr15:62149239:62149352:+@chr15:62159997:62160128:+	0.28	0.12	0.5	0.53	0.27	0.82	0.28	0.12	0.5	0.34	0.12	0.73	-0.25	1.16	-0.06	0.58
ENSMUSG00000021281	chr12:111444929:111445283:+@chr12:111445507:111446137:+@chr12:111447983:111448097:+	0.66	0.36	0.97	0.65	0.38	0.91	0.66	0.36	0.97	0.43	0.23	0.74	0.01	0.61	0.23	1.13
ENSMUSG00000004151	chr12:38827778:38827907:+@chr12:38831081:38831269:+@chr12:38835069:38835316:+	0.95	0.86	1	0.83	0.65	0.95	0.95	0.86	1	0.77	0.55	0.93	0.12	0.6	0.18	1.14
ENSMUSG00000031365	chrX:73344837:73344912:+@chrX:73351269:73351360:+@chrX:73351809:73351923:+	0.2	0.1	0.36	0.32	0.15	0.57	0.2	0.1	0.36	0.46	0.21	0.7	-0.12	0.46	-0.26	1.27
ENSMUSG00000014767	chr17:15504274:15504647:+@chr17:15506372:15506410:+@chr17:15507343:15507430:+	0.05	0.02	0.1	0.15	0.07	0.25	0.05	0.02	0.1	0.16	0.08	0.27	-0.1	0.71	-0.11	1.02
ENSMUSG00000037266	chr4:134925293:134925432:+@chr4:134925777:134925821:+@chr4:134926735:134926818:+	0.12	0.09	0.16	0.18	0.12	0.25	0.12	0.09	0.16	0.22	0.15	0.3	-0.06	0.33	-0.1	1.4
NA	chr10:81328703:81328917:+@chr10:81330015:81330168:+@chr10:81332392:81333255:+	0.35	0.05	0.89	0.25	0.04	0.75	0.35	0.05	0.89	0.44	0.1	0.81	0.1	0.83	-0.09	0.9
ENSMUSG00000021614	chr13:89712205:89712498:-@chr13:89702918:89705797:-@chr13:89685079:89685192:-	0.74	0.57	0.92	0.53	0.37	0.79	0.74	0.57	0.92	0.69	0.5	0.88	0.21	1.36	0.05	0.37
ENSMUSG00000043079	chr18:60624171:60624305:-@chr18:60609907:60610001:-@chr18:60600206:60604490:-	0.36	0.06	0.85	0.27	0	0.71	0.36	0.06	0.85	0.15	0.01	0.48	0.09	0.95	0.21	0.78
NA	chr11:69322690:69323873:-@chr11:69321849:69321933:-@chr11:69321356:69321419:-	0.93	0.8	1	0.86	0.63	0.98	0.93	0.8	1	0.7	0.44	0.91	0.07	0.35	0.23	1.38
NA	chr10:87913619:87913800:+@chr10:87915298:87915349:+@chr10:87930675:87937047:+	0.54	0.26	0.83	0.42	0.11	0.77	0.54	0.26	0.83	0.3	0.05	0.67	0.12	0.66	0.24	1.07
ENSMUSG00000075284	chr2:73529327:73529410:-@chr2:73510943:73511011:-@chr2:73447849:73447937:-	0.26	0.01	0.67	0.26	0.02	0.68	0.26	0.01	0.67	0.47	0.09	0.99	0	0.68	-0.21	1.04
ENSMUSG00000039917	chr5:135635104:135635223:+@chr5:135635839:135635856:+@chr5:135635995:135636402:+	0.29	0.07	0.61	0.24	0.02	0.6	0.29	0.07	0.61	0.51	0.03	0.93	0.05	0.68	-0.22	1.04
ENSMUSG00000031728	chr8:109706357:109706419:+@chr8:109708029:109708144:+@chr8:109709411:109709527:+	0.58	0.37	0.81	0.81	0.51	0.98	0.58	0.37	0.81	0.45	0.19	0.72	-0.23	1.09	0.13	0.63
ENSMUSG00000044071	chr10:123705700:123705824:+@chr10:123730082:123730327:+@chr10:123738904:123741204:+	0.39	0.04	0.82	0.38	0.01	0.9	0.39	0.04	0.82	0.34	0.04	0.72	0.01	0.92	0.05	0.8
ENSMUSG00000031196	chrX:75316509:75316659:-@chrX:75296090:75296299:-@chrX:75285367:75288379:-	0.53	0.15	0.96	0.61	0.18	0.97	0.53	0.15	0.96	0.34	0.01	0.93	-0.08	0.81	0.19	0.91
ENSMUSG00000030116	chr6:122520896:122520928:+@chr6:122521893:122521928:+@chr6:122524487:122524510:+	0.54	0.09	0.93	0.48	0.06	0.81	0.54	0.09	0.93	0.42	0.06	0.87	0.06	0.92	0.12	0.8
ENSMUSG00000046110	chr2:121455663:121455841:-@chr2:121455276:121455355:-@chr2:121454944:121455037:-	0.27	0.05	0.82	0.35	0.03	0.81	0.27	0.05	0.82	0.44	0.11	0.81	-0.08	0.69	-0.17	1.03
ENSMUSG00000032305	chr9:57538811:57538888:+@chr9:57539246:57539294:+@chr9:57540655:57543187:+	0.49	0.33	0.68	0.45	0.2	0.73	0.49	0.33	0.68	0.71	0.51	0.9	0.04	0.48	-0.22	1.24
ENSMUSG00000086968	chr3:107895643:107896213:-@chr3:107894051:107894215:-@chr3:107888850:107893507:-	0.44	0.11	0.8	0.59	0.04	0.95	0.44	0.11	0.8	0.46	0.04	0.98	-0.15	1.01	-0.02	0.71
ENSMUSG00000035476	chrX:85574034:85574322:+@chrX:85575550:85575610:+@chrX:85609390:85609584:+	0.53	0.23	0.89	0.61	0.18	0.96	0.53	0.23	0.89	0.62	0.29	0.93	-0.08	0.82	-0.09	0.9
ENSMUSG00000004221	chrX:74424612:74424715:+@chrX:74427762:74427902:+@chrX:74432805:74433006:+	0.4	0.19	0.72	0.62	0.27	0.98	0.4	0.19	0.72	0.3	0.07	0.72	-0.22	1.01	0.1	0.71
ENSMUSG00000085287	chr17:87282174:87282814:-@chr17:87280559:87280762:-@chr17:87277412:87277582:-	0.66	0.29	0.97	0.67	0.13	0.98	0.66	0.29	0.97	0.75	0.38	0.98	-0.01	0.83	-0.09	0.89
ENSMUSG00000037447	chr1:36307733:36307836:+@chr1:36316212:36316327:+@chr1:36318084:36318181:+	0.7	0.33	0.96	0.7	0.31	0.97	0.7	0.33	0.96	0.58	0.16	0.96	0	0.55	0.12	1.17
ENSMUSG00000021809	chr14:20295088:20295266:+@chr14:20300587:20300679:+@chr14:20303953:20304092:+	0.65	0.33	0.96	0.46	0.04	0.88	0.65	0.33	0.96	0.69	0.31	0.96	0.19	0.77	-0.04	0.95
ENSMUSG00000024194	chr17:26939451:26939478:-@chr17:26939317:26939368:-@chr17:26938884:26939092:-	0.3	0.2	0.41	0.16	0.08	0.27	0.3	0.2	0.41	0.15	0.07	0.28	0.14	0.84	0.15	0.88
ENSMUSG00000021245	chr12:85247612:85247723:-@chr12:85245763:85245922:-@chr12:85240960:85240983:-	0.83	0.57	0.99	0.78	0.49	0.99	0.83	0.57	0.99	0.55	0.27	0.91	0.05	0.42	0.28	1.3
ENSMUSG00000072109	chr1:85105946:85106690:+@chr1:85107185:85107290:+@chr1:85111490:85111566:+	0.32	0.07	0.64	0.49	0.06	0.92	0.32	0.07	0.64	0.5	0.13	0.85	-0.17	0.92	-0.18	0.79
ENSMUSG00000020592	chr12:8771742:8771839:+@chr12:8772353:8772511:+@chr12:8789407:8789488:+	0.26	0.01	0.98	0.26	0.03	0.74	0.26	0.01	0.98	0.53	0.04	0.98	0	0.57	-0.27	1.14
ENSMUSG00000040268	chr7:130908336:130908425:+@chr7:130909588:130909658:+@chr7:130910832:130913302:+	0.11	0.06	0.18	0.24	0.12	0.39	0.11	0.06	0.18	0.24	0.12	0.39	-0.13	0.77	-0.13	0.94
NA	chr8:105194475:105194591:+@chr8:105202452:105202547:+@chr8:105215904:105217988:+	0.87	0.8	0.95	0.94	0.87	0.99	0.87	0.8	0.95	0.97	0.9	1	-0.07	0.27	-0.1	1.44
ENSMUSG00000030846	chr7:128461125:128461513:-@chr7:128458597:128458656:-@chr7:128454936:128455032:-	0.1	0.06	0.16	0.08	0.02	0.19	0.1	0.06	0.16	0.25	0.13	0.38	0.02	0.16	-0.15	1.55
ENSMUSG00000055320	chr7:112839416:112839480:+@chr7:112856053:112856064:+@chr7:112856798:112856932:+	0.37	0.08	0.86	0.25	0.01	0.68	0.37	0.08	0.86	0.59	0.18	0.94	0.12	0.76	-0.22	0.95
ENSMUSG00000054752	chr4:53686388:53686517:+@chr4:53687207:53687239:+@chr4:53693987:53694084:+	0.28	0	0.83	0.26	0.01	0.66	0.28	0	0.83	0.39	0.03	0.86	0.02	0.79	-0.11	0.92
ENSMUSG00000058656	chr15:53860104:53860282:-@chr15:53719645:53719744:-@chr15:53658350:53658490:-	0.6	0.22	0.91	0.48	0.11	0.9	0.6	0.22	0.91	0.74	0.25	0.99	0.12	0.84	-0.14	0.87
ENSMUSG00000075555	chr15:79166066:79166179:+@chr15:79210191:79210249:+@chr15:79216110:79216224:+	0.64	0.26	0.95	0.59	0.06	0.99	0.64	0.26	0.95	0.67	0.27	0.98	0.05	1.04	-0.03	0.67
ENSMUSG00000020716	chr11:79458771:79458906:+@chr11:79468114:79468154:+@chr11:79468717:79468875:+	0.36	0.03	0.8	0.39	0.04	0.83	0.36	0.03	0.8	0.25	0.01	0.64	-0.03	0.99	0.11	0.72
ENSMUSG00000024002	chr17:32284518:32284721:-@chr17:32253041:32253200:-@chr17:32229417:32229735:-	0.33	0.25	0.42	0.35	0.23	0.49	0.33	0.25	0.42	0.18	0.09	0.3	-0.02	0.19	0.15	1.52
ENSMUSG00000021236	chr12:84400830:84400858:-@chr12:84399340:84399412:-@chr12:84396679:84396958:-	0.65	0.27	0.98	0.61	0.19	0.99	0.65	0.27	0.98	0.5	0.12	0.92	0.04	0.75	0.15	0.96
ENSMUSG00000063652	chr11:53979465:53980027:-@chr11:53969500:53969603:-@chr11:53960283:53960437:-	0.44	0.04	0.83	0.41	0.03	0.92	0.44	0.04	0.83	0.25	0	0.79	0.03	0.75	0.19	0.96
ENSMUSG00000029291	chr5:88583574:88584317:+@chr5:88598436:88598489:+@chr5:88614941:88615114:+	0.45	0.09	0.98	0.34	0.02	0.94	0.45	0.09	0.98	0.34	0.04	0.71	0.11	0.93	0.11	0.78
ENSMUSG00000028556	chr4:99001033:99001202:-@chr4:98993647:98993736:-@chr4:98991364:98991459:-	0.54	0.28	0.84	0.45	0.18	0.82	0.54	0.28	0.84	0.39	0.11	0.95	0.09	0.76	0.15	0.95
ENSMUSG00000000731	chr10:78036685:78036784:-@chr10:78034586:78035833:-@chr10:78034381:78034489:-	0.72	0.64	0.81	0.65	0.52	0.79	0.72	0.64	0.81	0.54	0.41	0.69	0.07	0.31	0.18	1.4
ENSMUSG00000019813	chr10:41729331:41729408:-@chr10:41728628:41728714:-@chr10:41723861:41723938:-	0.65	0.49	0.78	0.46	0.3	0.66	0.65	0.49	0.78	0.49	0.31	0.72	0.19	0.95	0.16	0.76
ENSMUSG00000066571	chr7:34313487:34313551:-@chr7:34312089:34312176:-@chr7:34283958:34285953:-	0.27	0.14	0.47	0.52	0.26	0.81	0.27	0.14	0.47	0.24	0.11	0.46	-0.25	1.34	0.03	0.36
NA	chr7:30051345:30051396:-@chr7:30045739:30045839:-@chr7:30044720:30044808:-	0.36	0.07	0.8	0.45	0.14	0.85	0.36	0.07	0.8	0.43	0.01	0.79	-0.09	0.93	-0.07	0.77
ENSMUSG00000020788	chr11:72988970:72989087:+@chr11:72989475:72989560:+@chr11:72991689:72993043:+	0.54	0.23	0.86	0.37	0.05	0.86	0.54	0.23	0.86	0.71	0.45	0.95	0.17	0.91	-0.17	0.79
ENSMUSG00000075256	chr2:79428702:79428988:-@chr2:79392943:79393325:-@chr2:79343217:79343291:-	0.69	0.26	0.96	0.53	0.08	0.99	0.69	0.26	0.96	0.76	0.49	0.94	0.16	1.05	-0.07	0.65
ENSMUSG00000025372	chr11:120000552:120000586:+@chr11:120003038:120003085:+@chr11:120006359:120006782:+	0.26	0.09	0.48	0.37	0.14	0.7	0.26	0.09	0.48	0.51	0.22	0.76	-0.11	0.53	-0.25	1.17
ENSMUSG00000036676	chr10:100487162:100487347:-@chr10:100485051:100485185:-@chr10:100477805:100478022:-	0.18	0.09	0.3	0.23	0.08	0.43	0.18	0.09	0.3	0.39	0.2	0.63	-0.05	0.29	-0.21	1.41
ENSMUSG00000097121	chr12:101084284:101084499:+@chr12:101086188:101086352:+@chr12:101088042:101088927:+	0.3	0.04	0.68	0.34	0.05	0.74	0.3	0.04	0.68	0.44	0.05	0.97	-0.04	0.76	-0.14	0.94
ENSMUSG00000028073	chr3:87768878:87768953:-@chr3:87763260:87763358:-@chr3:87760224:87760385:-	0.38	0.11	0.78	0.33	0.01	0.77	0.38	0.11	0.78	0.59	0.28	0.9	0.05	0.75	-0.21	0.95
ENSMUSG00000087174	chrX:105044002:105044111:-@chrX:105043125:105043304:-@chrX:105037350:105039812:-	0.33	0.15	0.55	0.25	0.03	0.66	0.33	0.15	0.55	0.51	0.1	0.92	0.08	0.69	-0.18	1.01
NA	chr9:124312560:124312694:-@chr9:124311676:124311750:-@chr9:124295358:124295484:-	0.54	0.07	0.96	0.41	0.04	0.85	0.54	0.07	0.96	0.53	0.14	0.87	0.13	0.98	0.01	0.72
ENSMUSG00000073664	chr1:60224625:60224731:+@chr1:60228622:60228708:+@chr1:60230602:60230685:+	0.56	0.3	0.83	0.4	0.11	0.73	0.56	0.3	0.83	0.54	0.06	0.97	0.16	0.74	0.02	0.96
ENSMUSG00000031133	chrX:57244605:57244750:-@chrX:57243390:57243515:-@chrX:57240594:57240687:-	0.6	0.16	0.93	0.6	0.28	0.88	0.6	0.16	0.93	0.41	0.2	0.67	0	0.73	0.19	0.97
ENSMUSG00000021902	chr14:31239631:31239737:-@chr14:31239120:31239236:-@chr14:31238337:31238482:-	0.38	0.14	0.64	0.38	0.12	0.81	0.38	0.14	0.64	0.16	0.03	0.48	0	0.51	0.22	1.19
ENSMUSG00000029651	chr5:148295483:148295588:+@chr5:148298252:148298325:+@chr5:148303483:148303602:+	0.36	0.08	0.81	0.22	0.03	0.66	0.36	0.08	0.81	0.25	0.03	0.68	0.14	0.84	0.11	0.86
ENSMUSG00000060441	chr7:104276606:104276836:-@chr7:104273354:104273376:-@chr7:104266469:104266566:-	0.61	0.06	0.96	0.38	0.04	0.84	0.61	0.06	0.96	0.48	0.05	0.95	0.23	1	0.13	0.7
ENSMUSG00000017760	chr2:164832873:164833196:+@chr2:164833724:164833850:+@chr2:164834030:164834208:+	0.6	0.48	0.73	0.77	0.62	0.9	0.6	0.48	0.73	0.67	0.53	0.83	-0.17	1.35	-0.07	0.34
ENSMUSG00000022253	chr15:9096014:9096092:+@chr15:9098809:9098874:+@chr15:9100106:9100145:+	0.39	0.24	0.56	0.59	0.38	0.79	0.39	0.24	0.56	0.56	0.36	0.78	-0.2	0.92	-0.17	0.77
ENSMUSG00000023066	chr18:89065847:89065918:+@chr18:89066786:89066936:+@chr18:89073545:89073734:+	0.06	0.01	0.21	0.35	0.07	0.7	0.06	0.01	0.21	0.14	0.01	0.61	-0.29	1.42	-0.08	0.27
ENSMUSG00000028411	chr4:40695377:40695423:-@chr4:40694852:40695136:-@chr4:40693390:40693449:-	0.77	0.61	0.91	0.89	0.71	0.99	0.77	0.61	0.91	0.93	0.75	1	-0.12	0.58	-0.16	1.11
ENSMUSG00000021338	chr13:24020047:24020071:-@chr13:24019564:24019713:-@chr13:24012484:24013460:-	0.03	0	0.11	0.12	0.02	0.3	0.03	0	0.11	0.21	0.07	0.42	-0.09	0.31	-0.18	1.38
ENSMUSG00000034164	chr11:5116880:5116924:-@chr11:5116477:5116630:-@chr11:5106266:5106969:-	0.25	0.02	0.69	0.39	0.02	0.84	0.25	0.02	0.69	0.31	0.01	0.92	-0.14	0.85	-0.06	0.84
ENSMUSG00000041977	chr3:87688779:87688850:+@chr3:87695398:87695517:+@chr3:87697345:87697390:+	0.28	0.12	0.52	0.53	0.25	0.82	0.28	0.12	0.52	0.22	0.08	0.42	-0.25	1.27	0.06	0.42
NA	chr18:45836978:45837083:-@chr18:45701868:45701922:-@chr18:45683487:45685558:-	0.37	0.06	0.76	0.46	0.05	0.89	0.37	0.06	0.76	0.46	0.1	0.89	-0.09	0.82	-0.09	0.87
ENSMUSG00000025420	chr18:77047174:77047296:-@chr18:77011984:77012104:-@chr18:77010947:77011045:-	0.63	0.3	0.93	0.68	0.31	0.94	0.63	0.3	0.93	0.7	0.3	0.99	-0.05	0.77	-0.07	0.92
ENSMUSG00000039153	chr17:44814169:44814292:-@chr17:44735233:44735618:-@chr17:44724745:44724901:-	0.55	0.21	0.88	0.64	0.17	0.96	0.55	0.21	0.88	0.54	0.19	0.94	-0.09	0.85	0.01	0.84
ENSMUSG00000074733	chr19:61118227:61118350:-@chr19:61117615:61117727:-@chr19:61114984:61117288:-	0.42	0.17	0.78	0.25	0.04	0.63	0.42	0.17	0.78	0.59	0.19	0.98	0.17	0.72	-0.17	0.97
ENSMUSG00000021224	chr12:83799508:83799657:-@chr12:83797197:83797343:-@chr12:83795439:83796154:-	0.31	0.2	0.44	0.15	0.06	0.27	0.31	0.2	0.44	0.3	0.16	0.49	0.16	1.42	0.01	0.27
ENSMUSG00000033416	chr10:75510032:75510123:-@chr10:75509592:75509704:-@chr10:75420665:75420796:-	0.64	0.32	0.98	0.63	0.18	0.98	0.64	0.32	0.98	0.44	0.06	0.87	0.01	0.83	0.2	0.86
ENSMUSG00000033728	chr15:76710660:76710927:+@chr15:76711356:76711530:+@chr15:76712867:76713220:+	0.75	0.55	0.94	0.53	0.35	0.74	0.75	0.55	0.94	0.68	0.49	0.87	0.22	1.3	0.07	0.39
ENSMUSG00000026031	chr1:58711508:58711592:+@chr1:58713571:58713659:+@chr1:58726306:58726732:+	0.82	0.51	0.98	0.74	0.41	0.98	0.82	0.51	0.98	0.6	0.31	0.88	0.08	0.57	0.22	1.12
ENSMUSG00000026987	chr2:59933671:59933715:-@chr2:59933412:59933438:-@chr2:59932105:59932170:-	0.32	0.1	0.68	0.49	0.17	0.9	0.32	0.1	0.68	0.51	0.09	0.99	-0.17	0.81	-0.19	0.87
ENSMUSG00000027215	chr2:93462910:93462950:-@chr2:93443369:93443444:-@chr2:93437388:93437470:-	0.7	0.36	0.99	0.88	0.65	0.99	0.7	0.36	0.99	0.84	0.56	1	-0.18	0.76	-0.14	0.92
ENSMUSG00000031561	chr8:48335589:48335774:-@chr8:48313238:48313264:-@chr8:48310623:48310769:-	0.25	0.01	0.66	0.36	0.03	0.87	0.25	0.01	0.66	0.24	0.02	0.6	-0.11	0.91	0.01	0.77
ENSMUSG00000031748	chr8:93963384:93963537:+@chr8:93966868:93966989:+@chr8:93968032:93969388:+	0.63	0.14	0.94	0.62	0.17	0.96	0.63	0.14	0.94	0.54	0.09	0.96	0.01	0.87	0.09	0.81
ENSMUSG00000005763	chr1:165859789:165859824:+@chr1:165866655:165866898:+@chr1:165869018:165871153:+	0.68	0.57	0.8	0.7	0.49	0.95	0.68	0.57	0.8	0.48	0.32	0.67	-0.02	0.37	0.2	1.31
ENSMUSG00000026646	chr2:3474703:3474986:-@chr2:3472502:3472647:-@chr2:3464267:3464926:-	0.49	0.38	0.59	0.62	0.43	0.83	0.49	0.38	0.59	0.66	0.49	0.84	-0.13	0.55	-0.17	1.13
ENSMUSG00000029033	chr4:155891875:155892441:+@chr4:155895492:155895576:+@chr4:155896111:155896168:+	0.3	0.08	0.61	0.31	0	0.74	0.3	0.08	0.61	0.36	0.05	0.81	-0.01	0.94	-0.06	0.74
ENSMUSG00000005980	chr16:4039130:4039284:+@chr16:4039545:4039641:+@chr16:4039812:4040024:+	0.61	0.19	0.88	0.39	0.06	0.8	0.61	0.19	0.88	0.77	0.36	0.97	0.22	0.95	-0.16	0.73
ENSMUSG00000000275	chr11:89015167:89015190:+@chr11:89015533:89015631:+@chr11:89015719:89015817:+	0.93	0.82	0.99	0.76	0.59	0.89	0.93	0.82	0.99	0.9	0.67	0.99	0.17	1.48	0.03	0.2
ENSMUSG00000033287	chr15:78435585:78435710:+@chr15:78437158:78437232:+@chr15:78437584:78437671:+	0.45	0.16	0.89	0.42	0.06	0.88	0.45	0.16	0.89	0.28	0.04	0.69	0.03	0.94	0.17	0.74
ENSMUSG00000034813	chr10:119454034:119454422:+@chr10:119897715:119897795:+@chr10:119929901:119930036:+	0.74	0.22	0.96	0.49	0.02	0.92	0.74	0.22	0.96	0.64	0.13	0.99	0.25	0.83	0.1	0.85
ENSMUSG00000025656	chrX:95054943:95055011:-@chrX:95054229:95054290:-@chrX:95048944:95052154:-	0.48	0.09	0.96	0.73	0.35	1	0.48	0.09	0.96	0.58	0.08	0.95	-0.25	0.88	-0.1	0.79
ENSMUSG00000024238	chr18:5594203:5594472:+@chr18:5641382:5641518:+@chr18:5705043:5705243:+	0.41	0.1	0.82	0.49	0.17	0.94	0.41	0.1	0.82	0.51	0.06	0.94	-0.08	0.81	-0.1	0.86
ENSMUSG00000011257	chr4:123295202:123295321:+@chr4:123295750:123295836:+@chr4:123295930:123296057:+	0.8	0.75	0.85	0.88	0.83	0.93	0.8	0.75	0.85	0.87	0.81	0.91	-0.08	1.17	-0.07	0.5
ENSMUSG00000057058	chr11:96713017:96713202:+@chr11:96723350:96723397:+@chr11:96731125:96731225:+	0.4	0.07	0.95	0.51	0.03	0.94	0.4	0.07	0.95	0.42	0.07	0.87	-0.11	0.89	-0.02	0.78
ENSMUSG00000070371	chr7:127934139:127934280:-@chr7:127933567:127933832:-@chr7:127933371:127933492:-	0.49	0.29	0.76	0.38	0.14	0.68	0.49	0.29	0.76	0.73	0.41	0.98	0.11	0.6	-0.24	1.07
ENSMUSG00000036817	chr5:139226706:139226885:+@chr5:139230773:139230838:+@chr5:139233471:139233569:+	0.61	0.36	0.87	0.82	0.55	0.99	0.61	0.36	0.87	0.46	0.18	0.89	-0.21	0.84	0.15	0.83
NA	chr13:102693558:102693789:+@chr13:102702701:102702867:+@chr13:102739166:102739629:+	0.36	0.03	0.83	0.42	0.08	0.85	0.36	0.03	0.83	0.25	0	0.79	-0.06	0.86	0.11	0.81
ENSMUSG00000028785	chr4:129121835:129122036:-@chr4:129121222:129121302:-@chr4:129118364:129118762:-	0.36	0.08	0.8	0.27	0.02	0.77	0.36	0.08	0.8	0.35	0.02	0.89	0.09	0.89	0.01	0.78
NA	chr12:80675849:80675934:+@chr12:80677132:80677266:+@chr12:80679475:80683342:+	0.79	0.6	0.94	0.9	0.69	0.99	0.79	0.6	0.94	0.56	0.28	0.86	-0.11	0.64	0.23	1.03
ENSMUSG00000049606	chr5:106696532:106696830:-@chr5:106666785:106666845:-@chr5:106619540:106619642:-	0.71	0.45	0.9	0.82	0.53	0.97	0.71	0.45	0.9	0.45	0.12	0.9	-0.11	0.59	0.26	1.08
ENSMUSG00000002342	chr8:70172411:70172440:+@chr8:70174303:70174406:+@chr8:70180539:70180599:+	0.74	0.42	0.98	0.61	0.15	0.91	0.74	0.42	0.98	0.55	0.26	0.89	0.13	0.78	0.19	0.89
ENSMUSG00000061079	chr7:110071372:110071455:+@chr7:110072122:110072202:+@chr7:110074068:110074264:+	0.93	0.83	0.99	0.71	0.49	0.91	0.93	0.83	0.99	0.81	0.6	0.96	0.22	1.31	0.12	0.36
ENSMUSG00000072501	chr15:66597359:66597447:+@chr15:66597665:66597754:+@chr15:66604027:66604240:+	0.6	0.41	0.77	0.4	0.22	0.6	0.6	0.41	0.77	0.45	0.27	0.67	0.2	0.98	0.15	0.69
ENSMUSG00000045639	chr7:127615083:127615234:-@chr7:127613004:127613081:-@chr7:127612667:127612773:-	0.34	0.01	0.86	0.6	0.12	0.98	0.34	0.01	0.86	0.28	0.01	0.72	-0.26	0.91	0.06	0.75
ENSMUSG00000030314	chr6:114671102:114671252:+@chr6:114672791:114672843:+@chr6:114672974:114673140:+	0.47	0.13	0.96	0.61	0.14	0.97	0.47	0.13	0.96	0.38	0.04	0.76	-0.14	0.8	0.09	0.86
ENSMUSG00000049676	chr7:29195828:29195939:-@chr7:29191535:29191748:-@chr7:29190727:29190789:-	0.67	0.39	0.91	0.57	0.16	0.95	0.67	0.39	0.91	0.71	0.25	0.97	0.1	0.85	-0.04	0.81
ENSMUSG00000028073	chr3:87763260:87763358:-@chr3:87762212:87762281:-@chr3:87760224:87760385:-	0.62	0.18	0.99	0.48	0.11	0.89	0.62	0.18	0.99	0.69	0.35	0.96	0.14	0.86	-0.07	0.8
ENSMUSG00000041115	chrX:152221647:152221820:+@chrX:152222283:152222332:+@chrX:152222922:152225236:+	0.28	0.03	0.7	0.37	0.02	0.78	0.28	0.03	0.7	0.34	0.13	0.62	-0.09	0.96	-0.06	0.7
ENSMUSG00000063889	chr18:3295040:3295182:-@chr18:3287904:3288092:-@chr18:3276694:3276729:-	0.24	0.11	0.42	0.09	0.01	0.33	0.24	0.11	0.42	0.45	0.15	0.82	0.15	0.82	-0.21	0.84
ENSMUSG00000071064	chr8:79186176:79186353:+@chr8:79188149:79188181:+@chr8:79189667:79190863:+	0.65	0.34	0.99	0.43	0.04	0.91	0.65	0.34	0.99	0.73	0.36	0.97	0.22	0.94	-0.08	0.72
ENSMUSG00000024969	chr19:7280998:7281255:-@chr19:7279986:7280012:-@chr19:7279111:7279278:-	0.5	0.18	0.87	0.4	0.05	0.91	0.5	0.18	0.87	0.45	0.09	0.83	0.1	0.84	0.05	0.82
ENSMUSG00000044024	chr18:37956929:37956994:+@chr18:37957589:37957774:+@chr18:37958014:37958389:+	0.83	0.51	0.98	0.61	0.19	1	0.83	0.51	0.98	0.75	0.42	0.96	0.22	1.2	0.08	0.46
ENSMUSG00000038766	chr3:95216214:95216268:-@chr3:95208840:95208936:-@chr3:95206463:95206602:-	0.45	0.31	0.61	0.47	0.29	0.66	0.45	0.31	0.61	0.68	0.44	0.89	-0.02	0.33	-0.23	1.32
ENSMUSG00000005936	chr17:28952466:28952569:+@chr17:28957879:28958057:+@chr17:28961414:28961687:+	0.28	0.22	0.34	0.42	0.31	0.55	0.28	0.22	0.34	0.34	0.26	0.44	-0.14	1.36	-0.06	0.29
ENSMUSG00000047409	chr9:119011235:119011389:+@chr9:119020012:119020044:+@chr9:119026937:119027038:+	0.61	0.31	0.87	0.77	0.46	0.96	0.61	0.31	0.87	0.79	0.42	0.99	-0.16	0.71	-0.18	0.94
ENSMUSG00000075415	chr2:31054024:31054218:-@chr2:31044882:31044896:-@chr2:31040405:31040514:-	0.19	0.02	0.43	0.23	0.01	0.73	0.19	0.02	0.43	0.45	0.16	0.87	-0.04	0.61	-0.26	1.04
ENSMUSG00000024969	chr19:7279986:7280012:-@chr19:7279111:7279278:-@chr19:7278042:7278086:-	0.5	0.14	0.89	0.48	0.02	0.96	0.5	0.14	0.89	0.56	0.11	0.92	0.02	0.89	-0.06	0.76
ENSMUSG00000026490	chr1:180118736:180118783:+@chr1:180130796:180130900:+@chr1:180134297:180134380:+	0.32	0.02	0.85	0.3	0	0.95	0.32	0.02	0.85	0.38	0.05	0.81	0.02	0.66	-0.06	0.99
NA	chr17:36084160:36084249:-@chr17:36083696:36083932:-@chr17:36081242:36081517:-	0.43	0.15	0.72	0.37	0.05	0.76	0.43	0.15	0.72	0.51	0.11	0.99	0.06	0.75	-0.08	0.9
ENSMUSG00000041119	chr17:31415280:31415357:+@chr17:31420245:31420257:+@chr17:31443166:31443220:+	0.57	0.12	0.93	0.54	0.07	0.94	0.57	0.12	0.93	0.61	0.2	0.94	0.03	0.82	-0.04	0.83
ENSMUSG00000031309	chrX:159256120:159256188:+@chrX:159278110:159278203:+@chrX:159279167:159279203:+	0.68	0.33	0.96	0.68	0.2	0.99	0.68	0.33	0.96	0.59	0.23	0.98	0	0.89	0.09	0.76
ENSMUSG00000085642	chr12:20920842:20921262:-@chr12:20915748:20915791:-@chr12:20914759:20914841:-	0.6	0.24	0.92	0.56	0.22	0.9	0.6	0.24	0.92	0.53	0.07	0.99	0.04	0.68	0.07	0.97
ENSMUSG00000029026	chr4:154062512:154062639:-@chr4:154061362:154061500:-@chr4:154060588:154060681:-	0.66	0.26	0.92	0.45	0.1	0.9	0.66	0.26	0.92	0.7	0.29	0.95	0.21	1.04	-0.04	0.61
ENSMUSG00000020173	chr11:12309614:12309752:-@chr11:12306958:12307128:-@chr11:12266856:12267144:-	0.18	0.11	0.26	0.06	0.01	0.13	0.18	0.11	0.26	0.09	0.02	0.23	0.12	1.24	0.09	0.41
ENSMUSG00000075256	chr2:79392943:79393185:-@chr2:79368680:79368811:-@chr2:79343217:79343291:-	0.74	0.42	0.97	0.49	0.02	0.97	0.74	0.42	0.97	0.66	0.21	0.96	0.25	0.97	0.08	0.68
ENSMUSG00000030924	chr7:119834264:119834401:+@chr7:119843848:119844064:+@chr7:119848732:119848941:+	0.77	0.57	0.93	0.65	0.39	0.93	0.77	0.57	0.93	0.53	0.17	0.94	0.12	0.64	0.24	1.01
ENSMUSG00000090077,ENSMUSG00000027582	chr2:181381358:181381394:+@chr2:181382194:181382314:+@chr2:181382487:181382544:+	0.89	0.69	0.99	0.81	0.48	0.99	0.89	0.69	0.99	0.61	0.29	0.89	0.08	0.37	0.28	1.28
ENSMUSG00000044501	chr17:22361453:22361707:+@chr17:22372036:22372088:+@chr17:22373643:22373769:+	0.33	0.04	0.69	0.47	0.06	0.91	0.33	0.04	0.69	0.53	0.26	0.83	-0.14	0.88	-0.2	0.76
ENSMUSG00000028621	chr4:107073873:107073960:+@chr4:107077676:107077780:+@chr4:107080891:107081094:+	0.69	0.45	0.91	0.85	0.59	1	0.69	0.45	0.91	0.87	0.6	1	-0.16	0.75	-0.18	0.89
ENSMUSG00000003282	chr4:3915621:3915725:-@chr4:3912420:3912511:-@chr4:3908906:3909002:-	0.13	0	0.47	0.37	0.03	0.83	0.13	0	0.47	0.23	0.03	0.53	-0.24	1.09	-0.1	0.55
ENSMUSG00000039307	chr11:121214760:121214924:+@chr11:121216893:121217076:+@chr11:121218088:121218159:+	0.56	0.31	0.82	0.64	0.3	0.94	0.56	0.31	0.82	0.78	0.41	0.98	-0.08	0.71	-0.22	0.93
ENSMUSG00000055320	chr7:112842040:112842102:+@chr7:112856053:112856064:+@chr7:112856798:112856932:+	0.1	0.05	0.17	0.21	0.1	0.34	0.1	0.05	0.17	0.23	0.13	0.36	-0.11	0.6	-0.13	1.04
ENSMUSG00000024426	chr17:35904290:35904335:-@chr17:35904108:35904176:-@chr17:35902356:35902438:-	0.61	0.3	0.86	0.79	0.43	0.98	0.61	0.3	0.86	0.58	0.14	0.95	-0.18	0.97	0.03	0.67
ENSMUSG00000025006	chr19:40344356:40344439:-@chr19:40340685:40340750:-@chr19:40336986:40337035:-	0.45	0.06	0.91	0.45	0.07	0.98	0.45	0.06	0.91	0.39	0.1	0.76	0	0.97	0.06	0.67
ENSMUSG00000046110	chr2:121454944:121455037:-@chr2:121453998:121454209:-@chr2:121453709:121453804:-	0.67	0.28	0.96	0.65	0.32	0.93	0.67	0.28	0.96	0.52	0.18	0.9	0.02	0.68	0.15	0.96
ENSMUSG00000030924	chr7:119834264:119834401:+@chr7:119843242:119843334:+@chr7:119843848:119844064:+	0.55	0.33	0.76	0.53	0.19	0.88	0.55	0.33	0.76	0.29	0.01	0.73	0.02	0.57	0.26	1.07
ENSMUSG00000074643,ENSMUSG00000027618	chr2:156111828:156111909:-@chr2:156103349:156103429:-@chr2:156079339:156079464:-	0.66	0.35	0.99	0.41	0.2	0.67	0.66	0.35	0.99	0.59	0.36	0.95	0.25	1.01	0.07	0.63
ENSMUSG00000041215	chr16:20206084:20206245:+@chr16:20207624:20207793:+@chr16:20208419:20208577:+	0.69	0.54	0.84	0.49	0.3	0.72	0.69	0.54	0.84	0.56	0.34	0.84	0.2	1.04	0.13	0.6
ENSMUSG00000038535	chr9:72301701:72301766:+@chr9:72301867:72302006:+@chr9:72307951:72308068:+	0.86	0.7	0.96	0.68	0.5	0.85	0.86	0.7	0.96	0.68	0.43	0.92	0.18	0.93	0.18	0.71
ENSMUSG00000030660	chr7:116417453:116418581:-@chr7:116405860:116405963:-@chr7:116394201:116394358:-	0.75	0.6	0.87	0.88	0.76	0.97	0.75	0.6	0.87	0.9	0.73	0.99	-0.13	0.82	-0.15	0.82
ENSMUSG00000022948	chr16:93603566:93603815:-@chr16:93603137:93603211:-@chr16:93601638:93601798:-	0.59	0.24	0.96	0.5	0.08	0.84	0.59	0.24	0.96	0.69	0.3	0.98	0.09	0.69	-0.1	0.95
ENSMUSG00000011832	chr8:4200868:4200921:+@chr8:4202936:4203174:+@chr8:4203514:4203642:+	0.69	0.36	0.97	0.64	0.21	0.96	0.69	0.36	0.97	0.68	0.31	0.93	0.05	0.82	0.01	0.82
ENSMUSG00000035919	chr9:22475715:22476055:+@chr9:22476570:22476625:+@chr9:22490818:22490940:+	0.46	0.23	0.68	0.46	0.22	0.7	0.46	0.23	0.68	0.22	0.05	0.59	0	0.5	0.24	1.14
ENSMUSG00000046774	chrX:101797716:101797761:+@chrX:101798102:101798165:+@chrX:101798342:101798383:+	0.75	0.36	0.97	0.6	0.13	0.97	0.75	0.36	0.97	0.75	0.21	0.99	0.15	1.08	0	0.55
ENSMUSG00000064284	chr15:85811639:85811697:-@chr15:85810843:85811048:-@chr15:85809212:85809324:-	0.76	0.61	0.91	0.56	0.34	0.77	0.76	0.61	0.91	0.63	0.36	0.84	0.2	1.08	0.13	0.55
ENSMUSG00000032698	chr2:103970493:103970712:+@chr2:103976005:103976220:+@chr2:103980875:103981878:+	0.54	0.24	0.9	0.66	0.24	0.98	0.54	0.24	0.9	0.7	0.35	0.94	-0.12	0.89	-0.16	0.74
ENSMUSG00000040187	chr6:146825167:146825228:+@chr6:146827216:146827324:+@chr6:146828099:146828186:+	0.65	0.17	0.96	0.88	0.64	0.99	0.65	0.17	0.96	0.62	0.32	0.88	-0.23	0.77	0.03	0.86
ENSMUSG00000055692	chr16:17276837:17276887:+@chr16:17276962:17277039:+@chr16:17277194:17277250:+	0.64	0.23	0.95	0.69	0.3	0.95	0.64	0.23	0.95	0.6	0.13	0.94	-0.05	0.68	0.04	0.95
ENSMUSG00000022789	chr16:16319452:16319508:-@chr16:16318445:16318477:-@chr16:16316602:16316778:-	0.21	0.15	0.28	0.11	0.05	0.17	0.21	0.15	0.28	0.19	0.11	0.28	0.1	1.46	0.02	0.17
ENSMUSG00000045482	chr5:144810151:144810204:+@chr5:144810332:144810352:+@chr5:144811895:144812014:+	0.35	0.03	0.86	0.31	0.06	0.81	0.35	0.03	0.86	0.26	0.02	0.67	0.04	0.8	0.09	0.83
ENSMUSG00000034940	chr11:83985249:83985551:+@chr11:83986814:83986851:+@chr11:83987913:83987990:+	0.71	0.3	0.98	0.52	0.11	0.88	0.71	0.3	0.98	0.73	0.35	0.97	0.19	0.9	-0.02	0.73
ENSMUSG00000025915	chr1:9798130:9798246:+@chr1:9827013:9827119:+@chr1:9865131:9865348:+	0.36	0.04	0.79	0.25	0.04	0.86	0.36	0.04	0.79	0.29	0.04	0.75	0.11	0.85	0.07	0.78
ENSMUSG00000020319	chr11:21572281:21572370:+@chr11:21652226:21652310:+@chr11:21659995:21660042:+	0.75	0.28	0.99	0.58	0.14	0.93	0.75	0.28	0.99	0.74	0.31	0.99	0.17	1.01	0.01	0.62
ENSMUSG00000034303	chr9:37347738:37347923:-@chr9:37343884:37344033:-@chr9:37342436:37342621:-	0.93	0.79	1	0.7	0.43	0.92	0.93	0.79	1	0.91	0.73	0.99	0.23	1.44	0.02	0.19
ENSMUSG00000009418	chr1:135467641:135467789:-@chr1:135465839:135466009:-@chr1:135464706:135464758:-	0.85	0.6	0.98	0.61	0.28	0.95	0.85	0.6	0.98	0.81	0.54	0.96	0.24	1.22	0.04	0.41
ENSMUSG00000030786	chr7:128116402:128116503:+@chr7:128116736:128116846:+@chr7:128126808:128128160:+	0.74	0.28	0.94	0.59	0.2	0.91	0.74	0.28	0.94	0.59	0.1	0.97	0.15	0.87	0.15	0.76
ENSMUSG00000038056	chr5:25338413:25338581:-@chr5:25330796:25330900:-@chr5:25329447:25329575:-	0.39	0.25	0.56	0.63	0.35	0.88	0.39	0.25	0.56	0.53	0.26	0.84	-0.24	1.04	-0.14	0.58
ENSMUSG00000044876	chr7:6172513:6172574:+@chr7:6173982:6174101:+@chr7:6183862:6184202:+	0.56	0.45	0.67	0.73	0.59	0.84	0.56	0.45	0.67	0.62	0.45	0.76	-0.17	1.3	-0.06	0.32
ENSMUSG00000052889	chr7:122600690:122600830:+@chr7:122627656:122627871:+@chr7:122633745:122634402:+	0.61	0.1	1	0.61	0.21	0.97	0.61	0.1	1	0.58	0.22	0.92	0	0.69	0.03	0.93
ENSMUSG00000054206	chr10:79689020:79689465:+@chr10:79692824:79692980:+@chr10:79694124:79694262:+	0.76	0.48	0.96	0.85	0.55	0.99	0.76	0.48	0.96	0.6	0.24	0.96	-0.09	0.56	0.16	1.06
ENSMUSG00000039607	chr9:116636369:116636479:-@chr9:116586018:116586095:-@chr9:116572747:116578702:-	0.48	0.14	0.88	0.6	0.19	0.98	0.48	0.14	0.88	0.27	0.04	0.72	-0.12	0.85	0.21	0.77
ENSMUSG00000050908	chr16:10446930:10447350:-@chr16:10428659:10428803:-@chr16:10427383:10427472:-	0.65	0.31	0.91	0.74	0.16	0.97	0.65	0.31	0.91	0.46	0.19	0.82	-0.09	0.71	0.19	0.91
ENSMUSG00000013033	chr8:83922999:83923108:+@chr8:83924206:83924355:+@chr8:83929464:83930264:+	0.27	0.17	0.39	0.24	0.1	0.42	0.27	0.17	0.39	0.11	0.03	0.22	0.03	0.29	0.16	1.33
ENSMUSG00000067786	chr2:157560448:157560535:+@chr2:157561213:157561293:+@chr2:157561542:157562519:+	0.78	0.48	0.98	0.75	0.4	1	0.78	0.48	0.98	0.59	0.21	0.91	0.03	0.85	0.19	0.77
ENSMUSG00000067567	chrX:102504399:102504451:-@chrX:102499822:102499952:-@chrX:102498131:102498272:-	0.9	0.74	0.99	0.79	0.53	0.96	0.9	0.74	0.99	0.65	0.4	0.97	0.11	0.37	0.25	1.25
NA	chr1:195111080:195111155:-@chr1:195106818:195106922:-@chr1:195097382:195098841:-	0.85	0.78	0.91	0.72	0.58	0.82	0.85	0.78	0.91	0.76	0.65	0.85	0.13	1.17	0.09	0.45
ENSMUSG00000027281	chr2:136891608:136891661:+@chr2:136892284:136892361:+@chr2:136905543:136905600:+	0.3	0.13	0.54	0.36	0.07	0.8	0.3	0.13	0.54	0.58	0.15	0.94	-0.06	0.49	-0.28	1.12
ENSMUSG00000019763	chr10:4429077:4429171:-@chr10:4428369:4428465:-@chr10:4427171:4427691:-	0.01	0	0.06	0.07	0.02	0.15	0.01	0	0.06	0.12	0.04	0.25	-0.06	0.25	-0.11	1.36
ENSMUSG00000021870	chr14:26418113:26418247:-@chr14:26416203:26416292:-@chr14:26413175:26414988:-	0.77	0.64	0.9	0.93	0.82	1	0.77	0.64	0.9	0.76	0.62	0.9	-0.16	1.35	0.01	0.26
ENSMUSG00000049225	chr4:11965884:11965981:-@chr4:11965614:11965648:-@chr4:11958185:11962233:-	0.44	0.14	0.79	0.54	0.17	0.99	0.44	0.14	0.79	0.41	0.04	0.88	-0.1	0.81	0.03	0.8
ENSMUSG00000022010	chr14:76415821:76419009:+@chr14:76437666:76437815:+@chr14:76438936:76439108:+	0.3	0.13	0.59	0.37	0.12	0.67	0.3	0.13	0.59	0.13	0.02	0.37	-0.07	0.55	0.17	1.06
ENSMUSG00000002871	chr6:88907941:88908072:+@chr6:88908251:88908316:+@chr6:88909290:88909376:+	0.67	0.45	0.9	0.41	0.11	0.84	0.67	0.45	0.9	0.69	0.31	0.98	0.26	1.07	-0.02	0.54
ENSMUSG00000042515	chrX:139210739:139210806:+@chrX:139211359:139211435:+@chrX:139213091:139213238:+	0.37	0.19	0.56	0.25	0.05	0.56	0.37	0.19	0.56	0.59	0.28	0.91	0.12	0.72	-0.22	0.89
ENSMUSG00000031808	chr8:71568927:71569023:+@chr8:71569342:71569448:+@chr8:71570721:71570888:+	0.36	0.01	0.93	0.27	0.02	0.75	0.36	0.01	0.93	0.48	0.03	0.99	0.09	0.85	-0.12	0.76
ENSMUSG00000039607	chr9:116678647:116678697:-@chr9:116636369:116636479:-@chr9:116586018:116586095:-	0.57	0.12	0.96	0.58	0.23	0.88	0.57	0.12	0.96	0.59	0.23	0.88	-0.01	0.72	-0.02	0.89
ENSMUSG00000071064	chr8:79186176:79186358:+@chr8:79188149:79188181:+@chr8:79189667:79190863:+	0.47	0.16	0.79	0.37	0	0.89	0.47	0.16	0.79	0.54	0.09	0.92	0.1	0.95	-0.07	0.66
ENSMUSG00000022773	chr16:17070311:17070363:+@chr16:17077775:17078054:+@chr16:17081598:17081641:+	0.63	0.35	0.91	0.6	0.31	0.88	0.63	0.35	0.91	0.62	0.24	0.97	0.03	0.71	0.01	0.9
ENSMUSG00000031921	chr8:107076879:107076996:-@chr8:107072722:107072798:-@chr8:107072560:107072645:-	0.59	0.16	0.98	0.66	0.36	0.91	0.59	0.16	0.98	0.45	0.2	0.7	-0.07	0.72	0.14	0.89
ENSMUSG00000027575	chr2:180967225:180967329:+@chr2:180967534:180967814:+@chr2:180971051:180971114:+	0.66	0.55	0.78	0.75	0.54	0.93	0.66	0.55	0.78	0.48	0.35	0.63	-0.09	0.43	0.18	1.18
ENSMUSG00000074165	chr7:41633531:41633694:+@chr7:41634680:41634710:+@chr7:41647491:41647617:+	0.49	0.16	0.82	0.35	0.08	0.71	0.49	0.16	0.82	0.52	0.13	0.93	0.14	0.73	-0.03	0.88
ENSMUSG00000034243	chr16:36875202:36875263:+@chr16:36885037:36885225:+@chr16:36886131:36886228:+	0.77	0.46	0.95	0.65	0.27	0.99	0.77	0.46	0.95	0.77	0.39	0.99	0.12	1.14	0	0.47
ENSMUSG00000021180	chr12:100654271:100654489:-@chr12:100619526:100619641:-@chr12:100615997:100616104:-	0.81	0.58	0.96	0.8	0.52	0.98	0.81	0.58	0.96	0.58	0.28	0.88	0.01	0.37	0.23	1.24
ENSMUSG00000022555	chr15:76503274:76503315:-@chr15:76503154:76503198:-@chr15:76502959:76503001:-	0.68	0.29	0.96	0.53	0.13	0.93	0.68	0.29	0.96	0.52	0.16	0.89	0.15	0.79	0.16	0.82
ENSMUSG00000039205	chr2:32364219:32364334:+@chr2:32365803:32365874:+@chr2:32367303:32367532:+	0.64	0.43	0.85	0.85	0.61	0.98	0.64	0.43	0.85	0.78	0.45	0.99	-0.21	0.94	-0.14	0.66
ENSMUSG00000041974	chr16:16053266:16053516:-@chr16:16048004:16048104:-@chr16:16037490:16037709:-	0.77	0.63	0.88	0.93	0.77	1	0.77	0.63	0.88	0.87	0.65	0.99	-0.16	1.09	-0.1	0.51
NA	chr9:58229355:58229407:-@chr9:58221715:58221865:-@chr9:58217180:58220569:-	0.82	0.74	0.9	0.93	0.85	0.97	0.82	0.74	0.9	0.91	0.79	1	-0.11	1.07	-0.09	0.53
ENSMUSG00000055923	chr5:76905423:76905514:-@chr5:76904959:76905012:-@chr5:76904209:76904380:-	0.31	0.08	0.67	0.52	0.17	0.88	0.31	0.08	0.67	0.29	0.02	0.67	-0.21	0.95	0.02	0.65
ENSMUSG00000021615	chr13:90089497:90089608:-@chr13:90077003:90077092:-@chr13:90071541:90071689:-	0.03	0	0.09	0.15	0.05	0.32	0.03	0	0.09	0.05	0	0.14	-0.12	1.52	-0.02	0.08
ENSMUSG00000047496	chr1:105356343:105356710:-@chr1:105355041:105355163:-@chr1:105276917:105284954:-	0.48	0.18	0.82	0.43	0.08	0.75	0.48	0.18	0.82	0.66	0.3	0.95	0.05	0.58	-0.18	1.02
ENSMUSG00000027200	chr2:124660705:124660761:+@chr2:124662204:124662359:+@chr2:124664021:124667770:+	0.52	0.17	0.9	0.55	0.19	0.96	0.52	0.17	0.9	0.62	0.22	0.91	-0.03	0.7	-0.1	0.9
ENSMUSG00000049327	chr5:124445493:124445728:+@chr5:124445969:124446084:+@chr5:124447214:124447370:+	0.25	0.17	0.35	0.43	0.28	0.62	0.25	0.17	0.35	0.19	0.1	0.3	-0.18	1.32	0.06	0.28
ENSMUSG00000029359	chr5:118041316:118041533:+@chr5:118045010:118045154:+@chr5:118046315:118046384:+	0.41	0.06	0.84	0.33	0.07	0.82	0.41	0.06	0.84	0.54	0.17	0.93	0.08	0.88	-0.13	0.72
ENSMUSG00000026565	chr1:166002562:166002634:-@chr1:165952781:165952856:-@chr1:165945902:165946002:-	0.37	0.06	0.79	0.43	0.06	0.91	0.37	0.06	0.79	0.3	0.01	0.66	-0.06	0.82	0.07	0.78
ENSMUSG00000025920	chr1:16509342:16509408:-@chr1:16486020:16486150:-@chr1:16463035:16463194:-	0.35	0.2	0.53	0.15	0.04	0.32	0.35	0.2	0.53	0.28	0.12	0.47	0.2	1.2	0.07	0.4
ENSMUSG00000027618	chr2:156111906:156111978:-@chr2:156103349:156103429:-@chr2:156079339:156079464:-	0.67	0.42	0.97	0.44	0.21	0.81	0.67	0.42	0.97	0.54	0.34	0.78	0.23	0.96	0.13	0.64
ENSMUSG00000022779	chr16:16870891:16871055:+@chr16:16875072:16875155:+@chr16:16877832:16878016:+	0.31	0.18	0.48	0.57	0.28	0.84	0.31	0.18	0.48	0.36	0.15	0.64	-0.26	1.17	-0.05	0.43
ENSMUSG00000004221	chrX:74393291:74393405:+@chrX:74427762:74427874:+@chrX:74432805:74433006:+	0.28	0.09	0.57	0.54	0.13	0.96	0.28	0.09	0.57	0.29	0.07	0.66	-0.26	1.14	-0.01	0.46
ENSMUSG00000038544	chr4:59783728:59783855:-@chr4:59782254:59782334:-@chr4:59775447:59775549:-	0.82	0.73	0.89	0.94	0.83	0.99	0.82	0.73	0.89	0.88	0.77	0.96	-0.12	1.32	-0.06	0.27
ENSMUSG00000042515	chrX:139217166:139217214:+@chrX:139218209:139218308:+@chrX:139231286:139231414:+	0.38	0.03	0.82	0.38	0.05	0.87	0.38	0.03	0.82	0.56	0.15	0.89	0	0.66	-0.18	0.93
ENSMUSG00000031860	chr8:69859080:69859153:+@chr8:69864312:69864550:+@chr8:69864824:69865014:+	0.49	0.24	0.79	0.38	0.05	0.9	0.49	0.24	0.79	0.53	0.14	0.91	0.11	0.93	-0.04	0.66
NA	chr9:22071002:22071164:+@chr9:22076020:22076083:+@chr9:22076250:22076351:+	0.4	0.13	0.81	0.52	0.25	0.79	0.4	0.13	0.81	0.57	0.19	0.96	-0.12	0.65	-0.17	0.94
ENSMUSG00000038347	chr17:13548296:13548433:-@chr17:13540282:13540421:-@chr17:13496617:13496785:-	0.22	0	0.73	0.3	0.03	0.74	0.22	0	0.73	0.39	0.1	0.89	-0.08	0.76	-0.17	0.83
ENSMUSG00000027200	chr2:124660283:124660344:+@chr2:124662204:124662359:+@chr2:124664021:124667770:+	0.51	0.13	0.92	0.58	0.16	0.99	0.51	0.13	0.92	0.6	0.2	0.98	-0.07	0.76	-0.09	0.83
NA	chr8:79295078:79295507:+@chr8:79296612:79296651:+@chr8:79305603:79307774:+	0.61	0.12	0.91	0.66	0.17	0.96	0.61	0.12	0.91	0.68	0.26	0.99	-0.05	0.94	-0.07	0.65
ENSMUSG00000029127	chr5:38213308:38214383:-@chr5:38205889:38205962:-@chr5:38203745:38203827:-	0.66	0.28	0.94	0.64	0.29	0.92	0.66	0.28	0.94	0.71	0.2	0.99	0.02	0.63	-0.05	0.96
ENSMUSG00000030887	chr7:120668380:120668559:-@chr7:120662837:120662889:-@chr7:120659296:120660362:-	0.35	0.01	0.85	0.37	0.02	0.84	0.35	0.01	0.85	0.32	0.03	0.84	-0.02	0.87	0.03	0.72
ENSMUSG00000036452	chr18:39306702:39306852:+@chr18:39357553:39357663:+@chr18:39363117:39363208:+	0.73	0.34	0.99	0.69	0.17	0.97	0.73	0.34	0.99	0.63	0.2	0.98	0.04	0.86	0.1	0.73
ENSMUSG00000051730	chr2:69880767:69880948:-@chr2:69879102:69879184:-@chr2:69873884:69873935:-	0.91	0.85	0.95	0.81	0.71	0.89	0.91	0.85	0.95	0.79	0.68	0.89	0.1	0.69	0.12	0.9
ENSMUSG00000033577	chr9:80292357:80292517:+@chr9:80296643:80296681:+@chr9:80299146:80299249:+	0.66	0.41	0.89	0.65	0.36	0.97	0.66	0.41	0.89	0.44	0.19	0.78	0.01	0.6	0.22	0.99
ENSMUSG00000050876	chr13:59705046:59705088:-@chr13:59704141:59704201:-@chr13:59700083:59704022:-	0.65	0.24	0.97	0.61	0.22	0.95	0.65	0.24	0.97	0.44	0.07	0.87	0.04	0.69	0.21	0.9
ENSMUSG00000027618	chr2:156111906:156111978:-@chr2:156103349:156103397:-@chr2:156079339:156079464:-	0.67	0.37	0.94	0.45	0.24	0.73	0.67	0.37	0.94	0.6	0.32	0.86	0.22	0.89	0.07	0.7
ENSMUSG00000025854	chr5:138755081:138756225:+@chr5:138756702:138756779:+@chr5:138757801:138757979:+	0.31	0.07	0.6	0.14	0	0.36	0.31	0.07	0.6	0.16	0.03	0.4	0.17	0.82	0.15	0.77
ENSMUSG00000040481	chr11:107095716:107095925:-@chr11:107095002:107095190:-@chr11:107086712:107086897:-	0.4	0.28	0.53	0.59	0.32	0.86	0.4	0.28	0.53	0.59	0.36	0.81	-0.19	0.72	-0.19	0.86
ENSMUSG00000029544	chr5:115186012:115186121:-@chr5:115180792:115180971:-@chr5:115176240:115176270:-	0.48	0.25	0.75	0.5	0.19	0.92	0.48	0.25	0.75	0.71	0.28	0.99	-0.02	0.59	-0.23	0.99
ENSMUSG00000037697	chr14:45629580:45629753:-@chr14:45622841:45622942:-@chr14:45620712:45620840:-	0.14	0.05	0.3	0.4	0.16	0.72	0.14	0.05	0.3	0.12	0.03	0.27	-0.26	1.33	0.02	0.25
ENSMUSG00000033526	chr2:121355301:121355330:-@chr2:121350917:121351013:-@chr2:121350477:121350651:-	0.56	0.24	0.85	0.63	0.21	0.93	0.56	0.24	0.85	0.7	0.32	0.96	-0.07	0.79	-0.14	0.79
ENSMUSG00000034793	chr11:102192035:102192141:+@chr11:102192473:102192563:+@chr11:102193085:102193226:+	0.55	0.32	0.84	0.79	0.53	0.98	0.55	0.32	0.84	0.51	0.24	0.88	-0.24	1.02	0.04	0.56
ENSMUSG00000033166	chr14:99099446:99099770:-@chr14:99099119:99099186:-@chr14:99098683:99098840:-	0.06	0.02	0.12	0.09	0.03	0.2	0.06	0.02	0.12	0.21	0.09	0.36	-0.03	0.14	-0.15	1.44
NA	chr7:123484940:123485431:-@chr7:123482641:123482684:-@chr7:123478639:123480772:-	0.27	0.04	0.6	0.3	0.04	0.71	0.27	0.04	0.6	0.39	0.02	0.85	-0.03	0.68	-0.12	0.9
ENSMUSG00000027523	chr2:174297859:174300217:+@chr2:174300431:174300525:+@chr2:174334212:174334284:+	0.43	0.06	0.79	0.57	0.17	0.98	0.43	0.06	0.79	0.4	0.09	0.74	-0.14	0.82	0.03	0.76
NA	chr13:93304495:93305302:+@chr13:93386345:93386380:+@chr13:93387524:93387680:+	0.36	0.1	0.73	0.45	0.04	0.96	0.36	0.1	0.73	0.38	0.02	0.81	-0.09	0.81	-0.02	0.77
ENSMUSG00000075256	chr2:79428702:79428988:-@chr2:79392943:79393316:-@chr2:79343217:79343291:-	0.63	0.2	0.95	0.56	0.12	0.96	0.63	0.2	0.95	0.76	0.21	0.99	0.07	0.72	-0.13	0.86
ENSMUSG00000020917	chr11:100504203:100504293:-@chr11:100503160:100503189:-@chr11:100498621:100498762:-	0.43	0.38	0.48	0.45	0.37	0.52	0.43	0.38	0.48	0.33	0.26	0.4	-0.02	0.12	0.1	1.46
ENSMUSG00000003452	chr6:149518906:149519113:+@chr6:149520353:149520546:+@chr6:149550350:149550425:+	0.4	0.14	0.72	0.4	0.12	0.85	0.4	0.14	0.72	0.28	0.02	0.87	0	0.67	0.12	0.91
ENSMUSG00000020598	chr12:44578145:44578180:+@chr12:44584835:44584987:+@chr12:44590108:44590239:+	0.37	0.06	0.93	0.31	0.03	0.96	0.37	0.06	0.93	0.29	0.01	0.89	0.06	0.88	0.08	0.7
ENSMUSG00000002205	chr7:44770864:44770922:+@chr7:44775376:44775535:+@chr7:44777222:44777514:+	0.96	0.9	0.99	0.83	0.67	0.94	0.96	0.9	0.99	0.95	0.88	1	0.13	1.48	0.01	0.1
ENSMUSG00000025059	chrX:85711051:85711131:-@chrX:85706238:85706324:-@chrX:85701937:85704396:-	0.71	0.56	0.88	0.71	0.47	0.9	0.71	0.56	0.88	0.5	0.25	0.8	0	0.37	0.21	1.21
ENSMUSG00000092463,ENSMUSG00000031304	chrX:101266181:101266343:-@chrX:101265630:101265726:-@chrX:101265376:101265442:-	0.79	0.56	0.95	0.63	0.31	0.93	0.79	0.56	0.95	0.58	0.26	0.9	0.16	0.77	0.21	0.81
ENSMUSG00000028689	chr4:116708571:116708656:+@chr4:116708943:116709094:+@chr4:116709438:116709619:+	0.51	0.29	0.81	0.3	0.09	0.62	0.51	0.29	0.81	0.33	0.08	0.66	0.21	0.75	0.18	0.83
ENSMUSG00000014767	chr17:15501154:15501202:+@chr17:15501312:15501357:+@chr17:15502965:15503128:+	0.16	0.08	0.27	0.19	0.09	0.32	0.16	0.08	0.27	0.34	0.2	0.5	-0.03	0.2	-0.18	1.38
ENSMUSG00000013973	chr1:171329145:171329526:+@chr1:171331234:171331285:+@chr1:171338252:171338640:+	0.28	0.15	0.44	0.39	0.16	0.69	0.28	0.15	0.44	0.5	0.26	0.79	-0.11	0.47	-0.22	1.1
NA	chr2:120863294:120863418:+@chr2:120863740:120863844:+@chr2:120866330:120866690:+	0.21	0.03	0.57	0.41	0.02	0.92	0.21	0.03	0.57	0.27	0.03	0.66	-0.2	1.08	-0.06	0.49
ENSMUSG00000035268	chr2:163658458:163658659:+@chr2:163659150:163659235:+@chr2:163703486:163703555:+	0.48	0.18	0.79	0.64	0.36	0.86	0.48	0.18	0.79	0.56	0.24	0.84	-0.16	0.89	-0.08	0.68
ENSMUSG00000053332	chr1:161036820:161036852:+@chr1:161037124:161037164:+@chr1:161037288:161037315:+	0.46	0.08	0.87	0.44	0.09	0.85	0.46	0.08	0.87	0.42	0.01	0.94	0.02	0.77	0.04	0.8
ENSMUSG00000094786	chr2:177506909:177507035:+@chr2:177507243:177507303:+@chr2:177508454:177508641:+	0.76	0.58	0.89	0.87	0.62	0.98	0.76	0.58	0.89	0.54	0.3	0.79	-0.11	0.5	0.22	1.07
ENSMUSG00000039997,ENSMUSG00000090272	chr1:173935010:173935177:-@chr1:173933783:173933926:-@chr1:173928275:173929516:-	0.85	0.61	0.98	0.54	0.14	0.94	0.85	0.61	0.98	0.87	0.69	0.99	0.31	1.23	-0.02	0.34
ENSMUSG00000026979	chr2:24385397:24385462:+@chr2:24394022:24395040:+@chr2:24396305:24396433:+	0.8	0.48	0.99	0.73	0.39	0.95	0.8	0.48	0.99	0.55	0.26	0.84	0.07	0.5	0.25	1.07
ENSMUSG00000021557	chr13:59525146:59525239:-@chr13:59517653:59517690:-@chr13:59514087:59514295:-	0.83	0.6	0.98	0.59	0.28	0.87	0.83	0.6	0.98	0.7	0.35	0.91	0.24	1.02	0.13	0.55
ENSMUSG00000041633	chrX:153696085:153696280:-@chrX:153695624:153695678:-@chrX:153685154:153689697:-	0.41	0.02	0.79	0.61	0.16	0.92	0.41	0.02	0.79	0.51	0.1	0.96	-0.2	0.74	-0.1	0.83
ENSMUSG00000026546	chr1:172521130:172521181:+@chr1:172527790:172527915:+@chr1:172529810:172529952:+	0.62	0.2	0.93	0.69	0.25	0.99	0.62	0.2	0.93	0.77	0.39	1	-0.07	0.82	-0.15	0.75
ENSMUSG00000047497	chr15:11071499:11071866:+@chr15:11151921:11152071:+@chr15:11215541:11215737:+	0.69	0.24	0.97	0.71	0.39	0.96	0.69	0.24	0.97	0.88	0.68	0.99	-0.02	0.88	-0.19	0.69
ENSMUSG00000031996	chr9:31168708:31168916:-@chr9:31167561:31167728:-@chr9:31164543:31164673:-	0.42	0.38	0.47	0.51	0.45	0.57	0.42	0.38	0.47	0.51	0.44	0.58	-0.09	0.85	-0.09	0.72
ENSMUSG00000097391	chr12:109737681:109737807:+@chr12:109739626:109739763:+@chr12:109741690:109741815:+	0.56	0.19	0.88	0.64	0.32	0.89	0.56	0.19	0.88	0.39	0.13	0.65	-0.08	0.71	0.17	0.86
ENSMUSG00000023935	chr17:45474799:45474938:-@chr17:45464427:45464580:-@chr17:45461162:45461310:-	0.58	0.26	0.89	0.65	0.31	0.98	0.58	0.26	0.89	0.37	0.03	0.79	-0.07	0.69	0.21	0.88
ENSMUSG00000028919	chr4:141240632:141240744:+@chr4:141244818:141244966:+@chr4:141246175:141246609:+	0.37	0.09	0.73	0.32	0.03	0.71	0.37	0.09	0.73	0.28	0.01	0.76	0.05	0.69	0.09	0.88
ENSMUSG00000022321	chr15:18986687:18986940:+@chr15:18991913:18992049:+@chr15:18999864:18999985:+	0.77	0.43	0.96	0.83	0.53	0.99	0.77	0.43	0.96	0.53	0.18	0.93	-0.06	0.42	0.24	1.15
ENSMUSG00000090231,ENSMUSG00000024371,ENSMUSG00000092511	chr17:34858498:34858595:-@chr17:34858037:34858154:-@chr17:34857668:34857821:-	0.75	0.36	0.98	0.58	0.07	0.92	0.75	0.36	0.98	0.66	0.15	0.99	0.17	0.83	0.09	0.74
ENSMUSG00000048402	chr1:119002040:119002206:-@chr1:118890296:118890401:-@chr1:118855436:118855637:-	0.72	0.4	0.94	0.51	0.17	0.9	0.72	0.4	0.94	0.66	0.2	0.95	0.21	0.83	0.06	0.74
ENSMUSG00000031860	chr8:69859080:69859153:+@chr8:69870029:69870182:+@chr8:69870578:69870684:+	0.69	0.42	0.93	0.54	0.19	0.95	0.69	0.42	0.93	0.51	0.24	0.86	0.15	0.86	0.18	0.71
ENSMUSG00000038126	chr5:124324874:124325137:-@chr5:124320845:124320998:-@chr5:124316082:124316171:-	0.54	0.32	0.8	0.71	0.39	0.96	0.54	0.32	0.8	0.7	0.37	0.96	-0.17	0.82	-0.16	0.74
ENSMUSG00000033577	chr9:80293527:80293553:+@chr9:80293945:80293974:+@chr9:80296643:80296681:+	0.39	0.02	0.89	0.52	0.01	0.93	0.39	0.02	0.89	0.55	0.12	0.95	-0.13	0.64	-0.16	0.92
NA	chr17:46645975:46646022:-@chr17:46645081:46645153:-@chr17:46644249:46644512:-	0.5	0.3	0.7	0.55	0.32	0.78	0.5	0.3	0.7	0.73	0.41	0.99	-0.05	0.45	-0.23	1.11
ENSMUSG00000027104	chr2:73863169:73863238:-@chr2:73853795:73853891:-@chr2:73850864:73850982:-	0.55	0.46	0.64	0.68	0.55	0.79	0.55	0.46	0.64	0.68	0.56	0.79	-0.13	0.77	-0.13	0.79
ENSMUSG00000038695	chr7:44467980:44468159:+@chr7:44468306:44468417:+@chr7:44468807:44468969:+	0.19	0.09	0.34	0.24	0.08	0.45	0.19	0.09	0.34	0.4	0.21	0.65	-0.05	0.3	-0.21	1.26
ENSMUSG00000047045	chrX:142834185:142834393:+@chrX:142841583:142841645:+@chrX:142842410:142843494:+	0.32	0.03	0.82	0.41	0.09	0.78	0.32	0.03	0.82	0.43	0.03	0.83	-0.09	0.85	-0.11	0.71
ENSMUSG00000097039	chr15:62149239:62149352:+@chr15:62159997:62160128:+@chr15:62175467:62175548:+	0.39	0.1	0.84	0.34	0.11	0.68	0.39	0.1	0.84	0.62	0.24	0.91	0.05	0.55	-0.23	1.01
NA	chr6:48593883:48594052:+@chr6:48594862:48594976:+@chr6:48596296:48599082:+	0.5	0.17	0.83	0.59	0.21	0.97	0.5	0.17	0.83	0.52	0.2	0.91	-0.09	0.85	-0.02	0.71
ENSMUSG00000026222	chr1:85681086:85681139:+@chr1:85691975:85692049:+@chr1:85694259:85694309:+	0.64	0.35	0.92	0.63	0.11	0.97	0.64	0.35	0.92	0.74	0.42	0.97	0.01	0.94	-0.1	0.62
ENSMUSG00000029804	chr6:58831889:58831932:+@chr6:58832402:58832536:+@chr6:58843604:58843858:+	0.69	0.41	0.92	0.56	0.24	0.86	0.69	0.41	0.92	0.84	0.57	1	0.13	0.88	-0.15	0.68
ENSMUSG00000038126	chr5:124324874:124325137:-@chr5:124320845:124320954:-@chr5:124316082:124316171:-	0.59	0.32	0.87	0.65	0.25	0.94	0.59	0.32	0.87	0.41	0.14	0.8	-0.06	0.76	0.18	0.8
ENSMUSG00000018501	chr11:62351378:62351546:-@chr11:62349353:62349493:-@chr11:62345235:62345318:-	0.87	0.79	0.93	0.7	0.55	0.85	0.87	0.79	0.93	0.9	0.81	0.98	0.17	1.37	-0.03	0.19
ENSMUSG00000021990	chr14:60634729:60634864:+@chr14:60636368:60636646:+@chr14:60690854:60692548:+	0.46	0.28	0.65	0.36	0.11	0.69	0.46	0.28	0.65	0.32	0.11	0.69	0.1	0.67	0.14	0.89
ENSMUSG00000020868	chr11:94667584:94667846:-@chr11:94667099:94667294:-@chr11:94666198:94666531:-	0.91	0.77	0.98	0.82	0.57	0.97	0.91	0.77	0.98	0.64	0.36	0.93	0.09	0.32	0.27	1.24
ENSMUSG00000020758	chr11:116005531:116005767:+@chr11:116005897:116006055:+@chr11:116006461:116006610:+	0.15	0.02	0.47	0.23	0.05	0.49	0.15	0.02	0.47	0.39	0.07	0.77	-0.08	0.52	-0.24	1.03
ENSMUSG00000073733	chr4:141217252:141217404:+@chr4:141218105:141218229:+@chr4:141218538:141218674:+	0.62	0.23	0.97	0.82	0.47	0.99	0.62	0.23	0.97	0.74	0.36	0.97	-0.2	0.81	-0.12	0.74
ENSMUSG00000038295	chr5:24389781:24389922:-@chr5:24387689:24388443:-@chr5:24387387:24387543:-	0.43	0.22	0.7	0.63	0.34	0.9	0.43	0.22	0.7	0.55	0.22	0.88	-0.2	0.91	-0.12	0.64
ENSMUSG00000089960,ENSMUSG00000089675,ENSMUSG00000090124,ENSMUSG00000090145,ENSMUSG00000054545,ENSMUSG00000089943,ENSMUSG00000090171,ENSMUSG00000090165,ENSMUSG00000090175	chr1:88215044:88215175:+@chr1:88215795:88215882:+@chr1:88216138:88216357:+	0.78	0.59	0.94	0.94	0.8	0.99	0.78	0.59	0.94	0.92	0.79	0.99	-0.16	0.89	-0.14	0.66
ENSMUSG00000064215	chr12:103436563:103436682:+@chr12:103437390:103437524:+@chr12:103437676:103437705:+	0.81	0.71	0.9	0.93	0.84	0.98	0.81	0.71	0.9	0.91	0.8	0.98	-0.12	1.03	-0.1	0.52
ENSMUSG00000028073	chr3:87768878:87768953:-@chr3:87762212:87762281:-@chr3:87760224:87760385:-	0.55	0.21	0.88	0.64	0.31	0.91	0.55	0.21	0.88	0.67	0.3	0.97	-0.09	0.8	-0.12	0.75
ENSMUSG00000063889	chr18:3287904:3288092:-@chr18:3276694:3276729:-@chr18:3273422:3273578:-	0.6	0.21	0.87	0.68	0.13	0.98	0.6	0.21	0.87	0.65	0.26	0.97	-0.08	0.81	-0.05	0.74
ENSMUSG00000090086,ENSMUSG00000097213	chr5:123139869:123139973:-@chr5:123139719:123139755:-@chr5:123137955:123138066:-	0.33	0.04	0.76	0.24	0.01	0.62	0.33	0.04	0.76	0.28	0.01	0.79	0.09	0.67	0.05	0.88
ENSMUSG00000058402	chr7:29859979:29860093:+@chr7:29861016:29861068:+@chr7:29872892:29872933:+	0.74	0.32	0.99	0.8	0.45	0.99	0.74	0.32	0.99	0.53	0.17	0.89	-0.06	0.67	0.21	0.88
ENSMUSG00000007812	chr5:145235306:145235391:+@chr5:145235737:145235863:+@chr5:145237050:145238322:+	0.7	0.44	0.89	0.87	0.64	0.98	0.7	0.44	0.89	0.89	0.63	0.99	-0.17	0.72	-0.19	0.83
ENSMUSG00000056698	chr6:72598322:72598413:-@chr6:72597624:72597645:-@chr6:72596436:72596466:-	0.52	0.09	0.91	0.71	0.3	0.97	0.52	0.09	0.91	0.6	0.14	1	-0.19	0.84	-0.08	0.71
NA	chrX:150650434:150650548:-@chrX:150649548:150649655:-@chrX:150645303:150645521:-	0.44	0.17	0.85	0.35	0.07	0.84	0.44	0.17	0.85	0.63	0.17	0.95	0.09	0.6	-0.19	0.95
NA	chr17:36084160:36084249:-@chr17:36083696:36083965:-@chr17:36081242:36081517:-	0.46	0.11	0.77	0.42	0.06	0.99	0.46	0.11	0.77	0.56	0.17	0.93	0.04	0.85	-0.1	0.7
NA	chr1:140018776:140018921:-@chr1:139930727:139930897:-@chr1:139924008:139924181:-	0.85	0.58	0.99	0.76	0.34	1	0.85	0.58	0.99	0.68	0.38	0.95	0.09	0.6	0.17	0.95
ENSMUSG00000025261	chrX:151803282:151803569:+@chrX:151803756:151803802:+@chrX:151806272:151806407:+	0.1	0.01	0.31	0.36	0.05	0.73	0.1	0.01	0.31	0.23	0.02	0.52	-0.26	1	-0.13	0.54
ENSMUSG00000005936	chr17:28952599:28952757:+@chr17:28957879:28958057:+@chr17:28961414:28961687:+	0.35	0.27	0.44	0.47	0.35	0.6	0.35	0.27	0.44	0.51	0.34	0.68	-0.12	0.54	-0.16	1
ENSMUSG00000028538	chr4:117958428:117958614:-@chr4:117957435:117957518:-@chr4:117940354:117940500:-	0.16	0.09	0.27	0.28	0.14	0.45	0.16	0.09	0.27	0.32	0.18	0.48	-0.12	0.53	-0.16	1.01
ENSMUSG00000062866	chr10:13261766:13261924:-@chr10:13255310:13255321:-@chr10:13253342:13253879:-	0.34	0.09	0.65	0.5	0.04	0.95	0.34	0.09	0.65	0.45	0.15	0.84	-0.16	0.93	-0.11	0.61
NA	chr16:3744099:3744767:+@chr16:3748149:3748265:+@chr16:3748712:3750788:+	0.61	0.44	0.79	0.65	0.41	0.85	0.61	0.44	0.79	0.83	0.59	0.97	-0.04	0.43	-0.22	1.11
ENSMUSG00000028990	chr4:149485229:149485273:+@chr4:149485369:149485592:+@chr4:149485862:149486003:+	0.2	0.13	0.29	0.4	0.22	0.71	0.2	0.13	0.29	0.23	0.12	0.38	-0.2	1.33	-0.03	0.21
ENSMUSG00000002279	chr17:25585543:25585852:+@chr17:25588676:25588686:+@chr17:25612296:25612444:+	0.3	0.04	0.76	0.52	0.12	0.96	0.3	0.04	0.76	0.27	0.04	0.83	-0.22	0.86	0.03	0.68
ENSMUSG00000020212	chr10:118152175:118152274:+@chr10:118156834:118156863:+@chr10:118157195:118157370:+	0.06	0.01	0.14	0.24	0.09	0.46	0.06	0.01	0.14	0.06	0.01	0.17	-0.18	1.41	0	0.13
ENSMUSG00000004360	chr10:29222221:29222300:+@chr10:29223334:29223405:+@chr10:29224235:29225414:+	0.26	0.02	0.75	0.25	0.02	0.69	0.26	0.02	0.75	0.42	0	0.97	0.01	0.54	-0.16	1
ENSMUSG00000031714	chr8:80784627:80784930:-@chr8:80776161:80776250:-@chr8:80774934:80775027:-	0.13	0.1	0.16	0.2	0.15	0.25	0.13	0.1	0.16	0.2	0.15	0.26	-0.07	0.79	-0.07	0.75
ENSMUSG00000025006	chr19:40344356:40344439:-@chr19:40340045:40340146:-@chr19:40336986:40337035:-	0.47	0.14	0.86	0.46	0.13	0.85	0.47	0.14	0.86	0.52	0.16	0.86	0.01	0.77	-0.05	0.77
ENSMUSG00000059824	chr7:45705247:45705762:+@chr7:45706606:45706716:+@chr7:45708260:45708471:+	0.29	0.07	0.83	0.15	0.01	0.48	0.29	0.07	0.83	0.43	0.2	0.7	0.14	0.53	-0.14	1.01
ENSMUSG00000052062	chr1:62440011:62440121:+@chr1:62479499:62479795:+@chr1:62532645:62532780:+	0.69	0.24	0.96	0.66	0.24	0.96	0.69	0.24	0.96	0.64	0.12	0.95	0.03	0.77	0.05	0.77
ENSMUSG00000033767	chr3:83910369:83910508:-@chr3:83909152:83909334:-@chr3:83906347:83906425:-	0.53	0.34	0.8	0.35	0.16	0.64	0.53	0.34	0.8	0.5	0.19	0.94	0.18	0.82	0.03	0.72
ENSMUSG00000000325	chr16:18404460:18404545:+@chr16:18405102:18405221:+@chr16:18405607:18407074:+	0.87	0.76	0.95	0.68	0.5	0.85	0.87	0.76	0.95	0.82	0.67	0.94	0.19	1.26	0.05	0.28
ENSMUSG00000075289	chr19:4169899:4170130:-@chr19:4169528:4169808:-@chr19:4164324:4166564:-	0.46	0.17	0.82	0.25	0.01	0.72	0.46	0.17	0.82	0.41	0.12	0.79	0.21	0.99	0.05	0.55
ENSMUSG00000041046	chr11:6658533:6658627:+@chr11:6664201:6664347:+@chr11:6674763:6674895:+	0.2	0.07	0.36	0.06	0	0.21	0.2	0.07	0.36	0.06	0	0.2	0.14	0.83	0.14	0.71
ENSMUSG00000029267	chr5:108065674:108065965:+@chr5:108080825:108080841:+@chr5:108080922:108081023:+	0.55	0.31	0.79	0.35	0.15	0.65	0.55	0.31	0.79	0.45	0.17	0.78	0.2	0.91	0.1	0.63
ENSMUSG00000026135	chr1:74585384:74585697:-@chr1:74579325:74579449:-@chr1:74578123:74578287:-	0.72	0.54	0.88	0.52	0.18	0.79	0.72	0.54	0.88	0.54	0.26	0.84	0.2	0.79	0.18	0.75
ENSMUSG00000059475	chr9:20492386:20492451:-@chr9:20486330:20486425:-@chr9:20478133:20478254:-	0.47	0.27	0.68	0.64	0.41	0.88	0.47	0.27	0.68	0.69	0.46	0.9	-0.17	0.6	-0.22	0.93
ENSMUSG00000078350	chr4:154025504:154025621:-@chr4:154024067:154024193:-@chr4:154023688:154023887:-	0.13	0.01	0.43	0.2	0	0.75	0.13	0.01	0.43	0.36	0.04	0.88	-0.07	0.6	-0.23	0.93
ENSMUSG00000041264	chr5:149184560:149184806:+@chr5:149187708:149187876:+@chr5:149188345:149188473:+	0.68	0.59	0.79	0.83	0.7	0.93	0.68	0.59	0.79	0.8	0.66	0.92	-0.15	0.92	-0.12	0.61
ENSMUSG00000029337	chr5:98254184:98254760:+@chr5:98261943:98262046:+@chr5:98275211:98277030:+	0.66	0.51	0.83	0.86	0.63	0.99	0.66	0.51	0.83	0.57	0.32	0.77	-0.2	1.11	0.09	0.42
ENSMUSG00000021709	chr13:103830188:103830331:-@chr13:103827907:103828216:-@chr13:103824720:103824926:-	0.72	0.48	0.94	0.77	0.41	0.97	0.72	0.48	0.94	0.65	0.32	0.99	-0.05	0.81	0.07	0.72
ENSMUSG00000059921	chr3:141465564:141465837:+@chr3:141677987:141678208:+@chr3:141714644:141714787:+	0.75	0.2	0.99	0.65	0.22	0.95	0.75	0.2	0.99	0.73	0.34	0.99	0.1	0.77	0.02	0.76
ENSMUSG00000079455	chr1:85272359:85272509:+@chr1:85272812:85272961:+@chr1:85275106:85275253:+	0.85	0.56	0.99	0.78	0.56	0.96	0.85	0.56	0.99	0.65	0.39	0.88	0.07	0.56	0.2	0.97
ENSMUSG00000041119	chr17:31415280:31415357:+@chr17:31420245:31420288:+@chr17:31443838:31443908:+	0.84	0.59	0.99	0.75	0.35	0.97	0.84	0.59	0.99	0.54	0.04	0.99	0.09	0.51	0.3	1.02
ENSMUSG00000040663	chr19:4214392:4214500:+@chr19:4215733:4215830:+@chr19:4220178:4220344:+	0.16	0.01	0.48	0.44	0.09	0.81	0.16	0.01	0.48	0.17	0.01	0.45	-0.28	1.18	-0.01	0.35
ENSMUSG00000041180	chr19:36587366:36587430:+@chr19:36595209:36595254:+@chr19:36597077:36597186:+	0.68	0.25	0.96	0.84	0.51	1	0.68	0.25	0.96	0.72	0.34	0.97	-0.16	0.7	-0.04	0.83
ENSMUSG00000030695	chr7:126800002:126800046:-@chr7:126797974:126798126:-@chr7:126797644:126797776:-	0.11	0.09	0.13	0.07	0.05	0.09	0.11	0.09	0.13	0.08	0.06	0.11	0.04	1.38	0.03	0.15
ENSMUSG00000032245	chr9:62838787:62838954:+@chr9:62840485:62840591:+@chr9:62844570:62844684:+	0.34	0.17	0.55	0.15	0.02	0.34	0.34	0.17	0.55	0.18	0.05	0.36	0.19	0.83	0.16	0.7
ENSMUSG00000085396	chrX:50562680:50562954:-@chrX:50560809:50561006:-@chrX:50558231:50558384:-	0.57	0.43	0.71	0.76	0.46	0.97	0.57	0.43	0.71	0.71	0.46	0.95	-0.19	0.93	-0.14	0.59
ENSMUSG00000003847	chr8:107324639:107324764:+@chr8:107338295:107338356:+@chr8:107338809:107339367:+	0.33	0.13	0.59	0.56	0.25	0.83	0.33	0.13	0.59	0.38	0.11	0.7	-0.23	0.96	-0.05	0.56
ENSMUSG00000007837	chr7:45060741:45060892:-@chr7:45060205:45060359:-@chr7:45059972:45060011:-	0.56	0.34	0.84	0.58	0.39	0.79	0.56	0.34	0.84	0.79	0.42	0.99	-0.02	0.43	-0.23	1.09
ENSMUSG00000029471	chr5:122743870:122743957:-@chr5:122742100:122742228:-@chr5:122737433:122737533:-	0.62	0.48	0.77	0.84	0.61	0.99	0.62	0.48	0.77	0.63	0.4	0.83	-0.22	1.16	-0.01	0.36
ENSMUSG00000022012	chr14:77664619:77664726:+@chr14:77668737:77668793:+@chr14:77699195:77699297:+	0.83	0.77	0.89	0.89	0.81	0.95	0.83	0.77	0.89	0.94	0.87	0.99	-0.06	0.28	-0.11	1.24
ENSMUSG00000032897	chr4:120790377:120790489:-@chr4:120781472:120781543:-@chr4:120773672:120773767:-	0.7	0.56	0.84	0.89	0.71	0.99	0.7	0.56	0.84	0.64	0.42	0.92	-0.19	1.05	0.06	0.47
NA	chr4:128806012:128806112:-@chr4:128794851:128794976:-@chr4:128790250:128790313:-	0.77	0.41	0.99	0.76	0.39	0.99	0.77	0.41	0.99	0.82	0.54	1	0.01	0.81	-0.05	0.71
NA	chr7:12421808:12421846:-@chr7:12418543:12418666:-@chr7:12415149:12417218:-	0.38	0.1	0.79	0.42	0.07	0.82	0.38	0.1	0.79	0.37	0.03	0.78	-0.04	0.7	0.01	0.82
ENSMUSG00000023206	chr2:11718264:11718458:+@chr2:11723413:11723610:+@chr2:11724096:11724128:+	0.61	0.18	0.91	0.6	0.21	0.94	0.61	0.18	0.91	0.64	0.31	0.95	0.01	0.78	-0.03	0.74
ENSMUSG00000046417	chr11:62620434:62620562:-@chr11:62609203:62609315:-@chr11:62604884:62606246:-	0.61	0.29	0.93	0.7	0.36	0.96	0.61	0.29	0.93	0.54	0.25	0.84	-0.09	0.83	0.07	0.69
ENSMUSG00000040648	chr1:97723670:97723834:-@chr1:97721106:97721279:-@chr1:97719834:97719906:-	0.05	0.03	0.07	0.06	0.03	0.11	0.05	0.03	0.07	0.01	0	0.03	-0.01	0.07	0.04	1.45
ENSMUSG00000027412	chr2:160899760:160899829:+@chr2:160901628:160901750:+@chr2:160901833:160901876:+	0.71	0.31	0.97	0.82	0.56	0.98	0.71	0.31	0.97	0.52	0.23	0.91	-0.11	0.54	0.19	0.98
ENSMUSG00000084925	chr14:20546293:20546344:+@chr14:20550071:20550175:+@chr14:20561986:20562096:+	0.64	0.36	0.91	0.61	0.22	0.99	0.64	0.36	0.91	0.57	0.09	0.97	0.03	0.86	0.07	0.66
ENSMUSG00000064120	chr17:49452211:49452331:+@chr17:49452795:49452857:+@chr17:49454030:49455430:+	0.79	0.5	0.99	0.77	0.42	0.98	0.79	0.5	0.99	0.66	0.23	0.98	0.02	0.87	0.13	0.65
ENSMUSG00000029104	chr5:34782742:34782825:+@chr5:34790267:34790387:+@chr5:34794105:34794164:+	0.94	0.82	1	0.87	0.66	0.99	0.94	0.82	1	0.72	0.52	0.92	0.07	0.26	0.22	1.26
ENSMUSG00000022558	chr15:76437238:76437390:+@chr15:76443250:76443404:+@chr15:76446516:76446681:+	0.94	0.8	0.99	0.77	0.58	0.92	0.94	0.8	0.99	0.8	0.59	0.98	0.17	0.91	0.14	0.61
ENSMUSG00000005262	chr16:18815329:18815361:+@chr16:18817903:18818024:+@chr16:18821039:18821169:+	0.91	0.77	0.99	0.73	0.56	0.9	0.91	0.77	0.99	0.75	0.55	0.93	0.18	0.79	0.16	0.73
ENSMUSG00000038495	chr3:96104527:96104819:+@chr3:96130231:96130343:+@chr3:96136474:96136624:+	0.53	0.37	0.68	0.66	0.45	0.87	0.53	0.37	0.68	0.75	0.53	0.96	-0.13	0.49	-0.22	1.02
ENSMUSG00000036834	chr3:63701784:63702138:-@chr3:63699780:63699807:-@chr3:63696237:63699477:-	0.29	0.03	0.71	0.51	0.05	0.99	0.29	0.03	0.71	0.4	0.03	0.87	-0.22	0.85	-0.11	0.66
ENSMUSG00000078765	chr7:30564082:30564131:+@chr7:30564203:30564228:+@chr7:30564474:30564607:+	0.25	0.01	0.83	0.54	0.09	0.99	0.25	0.01	0.83	0.29	0.01	0.89	-0.29	1.02	-0.04	0.49
ENSMUSG00000005882	chr2:155921635:155921727:-@chr2:155910357:155911836:-@chr2:155901298:155901355:-	0.51	0.31	0.74	0.56	0.29	1	0.51	0.31	0.74	0.76	0.38	0.99	-0.05	0.49	-0.25	1.02
ENSMUSG00000059439	chr11:85801785:85801952:+@chr11:85822022:85822112:+@chr11:85825202:85826058:+	0.21	0.1	0.34	0.19	0.06	0.36	0.21	0.1	0.34	0.45	0.15	0.74	0.02	0.27	-0.24	1.24
ENSMUSG00000002107	chr2:6560659:6560790:-@chr2:6554280:6554320:-@chr2:6553785:6553964:-	0.2	0.01	0.67	0.19	0.02	0.51	0.2	0.01	0.67	0.41	0.04	0.91	0.01	0.65	-0.21	0.86
ENSMUSG00000029095	chr5:35857826:35857964:+@chr5:35866705:35866766:+@chr5:35873170:35873224:+	0.54	0.1	0.87	0.59	0.13	0.95	0.54	0.1	0.87	0.64	0.14	0.98	-0.05	0.72	-0.1	0.79
ENSMUSG00000050174	chr3:37419342:37419590:-@chr3:37412360:37412415:-@chr3:37409508:37409562:-	0.58	0.12	0.99	0.69	0.29	0.97	0.58	0.12	0.99	0.56	0.21	0.92	-0.11	0.9	0.02	0.61
ENSMUSG00000036054	chr8:70260469:70260589:+@chr8:70261231:70261317:+@chr8:70262871:70263105:+	0.58	0.34	0.82	0.45	0.22	0.73	0.58	0.34	0.82	0.78	0.49	0.96	0.13	0.67	-0.2	0.84
ENSMUSG00000000244	chr7:143015581:143015667:+@chr7:143017579:143017673:+@chr7:143018691:143019485:+	0.73	0.28	0.98	0.85	0.57	0.99	0.73	0.28	0.98	0.67	0.34	0.93	-0.12	0.68	0.06	0.83
ENSMUSG00000002396	chr8:71371298:71371985:+@chr8:71372468:71372633:+@chr8:71372749:71372802:+	0.56	0.24	0.93	0.6	0.24	0.89	0.56	0.24	0.93	0.52	0.23	0.86	-0.04	0.81	0.04	0.7
ENSMUSG00000031150	chrX:7741212:7741324:-@chrX:7740349:7740409:-@chrX:7738370:7738523:-	0.31	0.14	0.56	0.34	0.06	0.99	0.31	0.14	0.56	0.19	0.01	0.6	-0.03	0.58	0.12	0.93
ENSMUSG00000097694	chr16:50538211:50538318:+@chr16:50541841:50542001:+@chr16:50554475:50554580:+	0.57	0.24	0.89	0.59	0.16	0.96	0.57	0.24	0.89	0.45	0.12	0.93	-0.02	0.8	0.12	0.71
ENSMUSG00000023805	chr17:6035411:6035559:+@chr17:6036357:6036505:+@chr17:6037384:6038555:+	0.32	0.1	0.63	0.39	0.1	0.77	0.32	0.1	0.63	0.11	0.01	0.33	-0.07	0.65	0.21	0.86
ENSMUSG00000044060,ENSMUSG00000089798	chr5:107546201:107546279:+@chr5:107548117:107548220:+@chr5:107549085:107551542:+	0.41	0.1	0.75	0.28	0.03	0.83	0.41	0.1	0.75	0.4	0.05	0.84	0.13	0.74	0.01	0.77
ENSMUSG00000029569	chr6:13607830:13608063:-@chr6:13606924:13607084:-@chr6:13605787:13605959:-	0.6	0.33	0.88	0.37	0.09	0.85	0.6	0.33	0.88	0.57	0.26	0.98	0.23	0.85	0.03	0.66
ENSMUSG00000027168	chr2:105692737:105692852:+@chr2:105695306:105695456:+@chr2:105696270:105697364:+	0.82	0.61	0.96	0.65	0.3	1	0.82	0.61	0.96	0.6	0.2	0.94	0.17	0.65	0.22	0.86
NA	chr14:5518253:5518384:+@chr14:5519061:5519243:+@chr14:5521795:5522929:+	0.7	0.43	0.99	0.8	0.47	0.99	0.7	0.43	0.99	0.7	0.32	0.97	-0.1	0.82	0	0.69
ENSMUSG00000066026	chr4:144918651:144918794:+@chr4:144919230:144919504:+@chr4:144919841:144920079:+	0.71	0.44	0.99	0.79	0.43	0.99	0.71	0.44	0.99	0.6	0.24	0.96	-0.08	0.69	0.11	0.82
ENSMUSG00000018449	chr11:70973015:70973075:+@chr11:70973802:70973913:+@chr11:70974069:70974132:+	0.8	0.65	0.93	0.78	0.57	0.94	0.8	0.65	0.93	0.6	0.44	0.76	0.02	0.35	0.2	1.16
ENSMUSG00000046157	chr12:79007313:79007627:-@chr12:78977761:78977941:-@chr12:78961795:78965176:-	0.59	0.34	0.87	0.75	0.4	0.97	0.59	0.34	0.87	0.77	0.43	0.98	-0.16	0.7	-0.18	0.8
ENSMUSG00000021277	chr12:111166548:111166602:+@chr12:111166999:111167107:+@chr12:111219811:111219921:+	0.19	0.06	0.39	0.44	0.17	0.84	0.19	0.06	0.39	0.25	0.04	0.76	-0.25	1.02	-0.06	0.48
ENSMUSG00000031105	chrX:48623580:48623828:+@chrX:48623962:48624206:+@chrX:48629252:48629345:+	0.31	0.13	0.54	0.48	0.06	0.88	0.31	0.13	0.54	0.43	0.14	0.73	-0.17	0.93	-0.12	0.57
ENSMUSG00000087368	chrX:136747323:136747448:+@chrX:136756494:136756620:+@chrX:136758101:136758196:+	0.34	0.12	0.62	0.48	0.22	0.8	0.34	0.12	0.62	0.45	0.07	0.88	-0.14	0.65	-0.11	0.85
ENSMUSG00000075040	chr2:91649151:91649791:-@chr2:91648936:91649026:-@chr2:91648016:91648077:-	0.51	0.16	0.86	0.69	0.32	0.99	0.51	0.16	0.86	0.55	0.24	0.84	-0.18	0.89	-0.04	0.61
ENSMUSG00000070371	chr7:127934510:127934627:-@chr7:127933567:127933832:-@chr7:127933371:127933492:-	0.4	0.25	0.59	0.33	0.11	0.71	0.4	0.25	0.59	0.65	0.25	0.97	0.07	0.51	-0.25	0.99
ENSMUSG00000041658	chrX:153143976:153144075:+@chrX:153148452:153148535:+@chrX:153150362:153150428:+	0.44	0.31	0.59	0.46	0.09	0.87	0.44	0.31	0.59	0.6	0.24	0.9	-0.02	0.74	-0.16	0.76
ENSMUSG00000018417	chr1:51769004:51769090:-@chr1:51768650:51768736:-@chr1:51766822:51766908:-	0.46	0.33	0.62	0.65	0.42	0.83	0.46	0.33	0.62	0.34	0.18	0.56	-0.19	0.96	0.12	0.54
ENSMUSG00000047617	chr2:25460009:25460074:-@chr2:25459775:25459915:-@chr2:25455141:25455648:-	0.73	0.35	0.98	0.66	0.22	0.98	0.73	0.35	0.98	0.75	0.3	0.99	0.07	0.77	-0.02	0.73
ENSMUSG00000022629	chr15:90956295:90956509:-@chr15:90949006:90949044:-@chr15:90943765:90943901:-	0.45	0.05	0.89	0.48	0.17	0.81	0.45	0.05	0.89	0.32	0.05	0.77	-0.03	0.78	0.13	0.72
[truncated: 8,413 more rows]

## Sheet: IR
		ctrl-1 PSI			KO-1 PSI			ctrl-2 PSI			KO-2 PSI			diff-1	Bayes-1	diff-2	Bayes-2
gene_ID	event_name	rep1_sample1_pos_mean	rep1_sample1_ci_low	rep1_sample1_ci_high	rep1_sample2_pos_mean	rep1_sample2_ci_low	rep1_sample2_ci_high	rep2_sample1_pos_mean	rep2_sample1_ci_low	rep2_sample1_ci_high	rep2_sample2_pos_mean	rep2_sample2_ci_low	rep2_sample2_ci_high	rep1_diff	rep1_bayes_factor	rep2_diff	rep2_bayes_factor
ENSMUSG00000026034	chr1:58417383-58417267:-@chr1:58417179-58417013:-	0.53	0.46	0.59	0.29	0.23	0.36	0.53	0.46	0.59	0.21	0.15	0.26	0.24	344.73	0.32	1000000000000
ENSMUSG00000041264	chr5:149213352-149213522:+@chr5:149214023-149215434:+	0.69	0.63	0.76	0.44	0.38	0.52	0.69	0.63	0.76	0.45	0.37	0.53	0.25	4.67968e+10	0.24	322.78
ENSMUSG00000026925	chr2:26399574-26399413:-@chr2:26399348-26399233:-	0.09	0.01	0.2	0.2	0.08	0.36	0.09	0.01	0.2	0.61	0.34	0.9	-0.11	0.43	-0.52	2520.77
ENSMUSG00000022561	chr15:76332160-76332271:+@chr15:76332484-76332631:+	0.42	0.32	0.54	0.14	0.07	0.23	0.42	0.32	0.54	0.2	0.11	0.33	0.28	2347.15	0.22	6.89
ENSMUSG00000024188	chr17:26253974-26254044:+@chr17:26255031-26255125:+	0.82	0.75	0.89	0.53	0.42	0.66	0.82	0.75	0.89	0.68	0.55	0.82	0.29	2287.53	0.14	1.01
ENSMUSG00000046962	chr16:97953093-97951470:-@chr16:97950869-97947435:-	0.87	0.8	0.92	0.62	0.51	0.74	0.87	0.8	0.92	0.71	0.59	0.81	0.25	557.44	0.16	3.37
ENSMUSG00000031434	chrX:139823413-139823130:-@chrX:139822828-139821635:-	0.55	0.36	0.74	0.26	0.14	0.41	0.55	0.36	0.74	0.18	0.07	0.34	0.29	3.54	0.37	138.03
ENSMUSG00000026848	chr2:30953752-30953892:+@chr2:30955778-30955953:+	0.6	0.49	0.73	0.4	0.31	0.55	0.6	0.49	0.73	0.33	0.25	0.41	0.2	2.49	0.27	121.04
ENSMUSG00000025507	chr7:141442564-141442151:-@chr7:141441821-141441612:-	0.42	0.28	0.59	0.14	0.07	0.25	0.42	0.28	0.59	0.22	0.1	0.4	0.28	64.32	0.2	1.22
ENSMUSG00000051557	chr4:155891415-155891358:-@chr4:155891239-155891052:-	0.5	0.36	0.64	0.19	0.09	0.31	0.5	0.36	0.64	0.3	0.17	0.44	0.31	30.07	0.2	1.59
ENSMUSG00000017405	chr11:78171298-78170873:-@chr11:78170794-78170613:-	0.17	0	0.58	0.81	0.47	0.99	0.17	0	0.58	0.34	0.08	0.82	-0.64	21.79	-0.17	0.65
ENSMUSG00000042404	chr3:90277735-90277904:+@chr3:90277988-90278129:+	0.08	0.01	0.21	0.33	0.1	0.66	0.08	0.01	0.21	0.47	0.23	0.72	-0.25	1.22	-0.39	19.58
ENSMUSG00000027610	chr2:155567887-155567783:-@chr2:155566884-155566803:-	0.14	0.07	0.27	0.62	0.31	0.99	0.14	0.07	0.27	0.16	0.07	0.35	-0.48	18.82	-0.02	0.2
ENSMUSG00000037306	chr4:134704290-134704197:-@chr4:134703766-134702945:-	0.5	0.28	0.73	0.89	0.66	0.99	0.5	0.28	0.73	0.81	0.56	0.96	-0.39	16	-0.31	1.97
ENSMUSG00000011658	chr7:44897520-44897624:+@chr7:44898503-44898700:+	0.15	0.1	0.22	0.37	0.23	0.54	0.15	0.1	0.22	0.45	0.24	0.81	-0.22	7.33	-0.3	8.66
ENSMUSG00000027953	chr3:89270139-89270062:-@chr3:89269950-89269827:-	0.27	0.16	0.4	0.1	0.04	0.22	0.27	0.16	0.4	0.04	0	0.12	0.17	1.58	0.23	13.91
ENSMUSG00000031310	chrX:101415406-101415188:-@chrX:101414898-101414748:-	0.39	0.3	0.49	0.59	0.43	0.77	0.39	0.3	0.49	0.68	0.51	0.84	-0.2	1.81	-0.29	13.01
ENSMUSG00000022561	chr15:76332160-76332287:+@chr15:76332484-76332631:+	0.88	0.7	0.99	0.42	0.2	0.8	0.88	0.7	0.99	0.45	0.22	0.77	0.46	7.58	0.43	7.11
ENSMUSG00000024516	chr18:65812665-65812741:+@chr18:65814838-65814957:+	0.72	0.48	0.93	0.48	0.3	0.72	0.72	0.48	0.93	0.31	0.2	0.48	0.24	1.35	0.41	13.24
ENSMUSG00000027381	chr2:128128620-128128756:+@chr2:128128925-128129014:+	0.81	0.63	0.95	0.62	0.42	0.83	0.81	0.63	0.95	0.44	0.27	0.65	0.19	0.9	0.37	13.33
ENSMUSG00000073422	chr17:34026470-34026396:-@chr17:34026225-34026033:-	0.65	0.47	0.82	0.34	0.19	0.52	0.65	0.47	0.82	0.31	0.17	0.5	0.31	4.66	0.34	9.47
ENSMUSG00000028107	chr3:95750417-95750339:-@chr3:95748554-95748487:-	0.84	0.63	0.98	0.76	0.47	0.97	0.84	0.63	0.98	0.42	0.24	0.65	0.08	0.35	0.42	12.83
ENSMUSG00000038212	chr13:65112982-65112756:-@chr13:65112658-65112504:-	0.83	0.62	0.99	0.36	0.16	0.65	0.83	0.62	0.99	0.74	0.42	0.96	0.47	10.88	0.09	0.49
ENSMUSG00000038685	chr2:181355924-181356258:+@chr2:181356358-181356616:+	0.86	0.77	0.93	0.6	0.44	0.75	0.86	0.77	0.93	0.61	0.42	0.79	0.26	5.69	0.25	4.86
ENSMUSG00000000823	chr2:181590181-181590053:-@chr2:181589959-181589373:-	0.54	0.33	0.77	0.44	0.24	0.71	0.54	0.33	0.77	0.18	0.05	0.36	0.1	0.48	0.36	7.22
ENSMUSG00000008855	chr11:102196117-102195952:-@chr11:102195868-102195749:-	0.2	0.08	0.35	0.2	0.03	0.52	0.2	0.08	0.35	0.67	0.32	0.95	0	0.39	-0.47	7.23
ENSMUSG00000025507	chr7:141442564-141442151:-@chr7:141441860-141441612:-	0.45	0.3	0.62	0.2	0.11	0.36	0.45	0.3	0.62	0.19	0.07	0.38	0.25	2.66	0.26	4.85
ENSMUSG00000020329	chr10:79737509-79737457:-@chr10:79737362-79737264:-	0.31	0.14	0.5	0.65	0.43	0.84	0.31	0.14	0.5	0.48	0.22	0.75	-0.34	6.33	-0.17	0.67
ENSMUSG00000031434	chrX:139823413-139823168:-@chrX:139822828-139821635:-	0.53	0.36	0.76	0.32	0.16	0.51	0.53	0.36	0.76	0.21	0.09	0.39	0.21	1.08	0.32	5.47
ENSMUSG00000028309	chr4:49632060-49632211:+@chr4:49632365-49632512:+	0.48	0.31	0.65	0.16	0.05	0.36	0.48	0.31	0.65	0.33	0.17	0.56	0.32	5.48	0.15	0.64
ENSMUSG00000024193	chr17:26936287-26936391:+@chr17:26936512-26936680:+	0.15	0.03	0.34	0.59	0.31	0.86	0.15	0.03	0.34	0.11	0.02	0.32	-0.44	5.73	0.04	0.28
ENSMUSG00000048502	chr14:25983005-25983111:+@chr14:25983122-25983545:+	0.2	0.05	0.45	0.59	0.33	0.87	0.2	0.05	0.45	0.24	0.02	0.6	-0.39	5.01	-0.04	0.49
ENSMUSG00000046111	chr9:15317593-15317459:-@chr9:15317113-15316915:-	0.61	0.44	0.77	0.3	0.16	0.48	0.61	0.44	0.77	0.33	0.15	0.57	0.31	3.55	0.28	1.83
ENSMUSG00000029165	chr5:30893901-30894070:+@chr5:30894375-30894510:+	0.08	0.03	0.16	0.36	0.17	0.62	0.08	0.03	0.16	0.41	0.1	0.8	-0.28	4.03	-0.33	1.29
ENSMUSG00000046449	chrX:104088230-104083856:-@chrX:104083283-104077435:-	0.49	0.38	0.6	0.66	0.5	0.8	0.49	0.38	0.6	0.78	0.59	0.96	-0.17	0.85	-0.29	3.92
ENSMUSG00000029359	chr5:118056377-118056443:+@chr5:118056537-118056644:+	0.31	0.11	0.55	0.73	0.36	0.96	0.31	0.11	0.55	0.55	0.28	0.82	-0.42	3.69	-0.24	0.99
ENSMUSG00000090112	chr10:11207097-11207275:+@chr10:11207822-11209552:+	0.32	0.15	0.56	0.74	0.39	0.95	0.32	0.15	0.56	0.47	0.14	0.9	-0.42	3.99	-0.15	0.61
ENSMUSG00000097290	chr16:21802953-21804242:+@chr16:21804385-21806123:+	0.89	0.64	1	0.91	0.69	1	0.89	0.64	1	0.44	0.1	0.8	-0.02	0.25	0.45	4.21
ENSMUSG00000046295	chr8:71406679-71406784:+@chr8:71406862-71407749:+	0.69	0.45	0.88	0.49	0.22	0.83	0.69	0.45	0.88	0.28	0.04	0.6	0.2	0.83	0.41	3.5
ENSMUSG00000024118	chr17:24220310-24220252:-@chr17:24220133-24219731:-	0.45	0.35	0.54	0.26	0.15	0.39	0.45	0.35	0.54	0.24	0.1	0.42	0.19	2.23	0.21	2
ENSMUSG00000029381	chr5:92939977-92942109:+@chr5:92942503-92943139:+	0.51	0.39	0.66	0.67	0.43	0.98	0.51	0.39	0.66	0.81	0.56	0.96	-0.16	0.6	-0.3	3.36
ENSMUSG00000030598	chr7:28737339-28737546:+@chr7:28737665-28738140:+	0.44	0.22	0.72	0.14	0.02	0.34	0.44	0.22	0.72	0.23	0.06	0.46	0.3	2.81	0.21	1.01
ENSMUSG00000008855	chr11:102196117-102195952:-@chr11:102195894-102195749:-	0.36	0.09	0.77	0.52	0.1	0.96	0.36	0.09	0.77	0.74	0.4	0.98	-0.16	0.79	-0.38	2.79
ENSMUSG00000024170	chr17:25107130-25106989:-@chr17:25106908-25106772:-	0.21	0.05	0.38	0.5	0.26	0.79	0.21	0.05	0.38	0.56	0.23	0.95	-0.29	1.83	-0.35	1.61
ENSMUSG00000055692	chr16:17276962-17277039:+@chr16:17277194-17277250:+	0.85	0.56	0.97	0.46	0.21	0.83	0.85	0.56	0.97	0.77	0.41	0.98	0.39	2.83	0.08	0.48
ENSMUSG00000005580	chr16:4419588-4419196:-@chr16:4418972-4417853:-	0.83	0.53	1	0.47	0.11	0.96	0.83	0.53	1	0.68	0.18	0.98	0.36	2.64	0.15	0.65
ENSMUSG00000037791	chr11:78024813-78024867:+@chr11:78024961-78025086:+	0.39	0.23	0.61	0.74	0.38	0.98	0.39	0.23	0.61	0.57	0.34	0.84	-0.35	2.4	-0.18	0.86
ENSMUSG00000036073,ENSMUSG00000073889	chr4:41756513-41756561:+@chr4:41756682-41756811:+	0.53	0.33	0.79	0.23	0.1	0.43	0.53	0.33	0.79	0.37	0.18	0.63	0.3	2.57	0.16	0.66
ENSMUSG00000052926	chr8:84958089-84957966:-@chr8:84957853-84957667:-	0.95	0.87	1	0.71	0.53	0.89	0.95	0.87	1	0.78	0.56	0.96	0.24	2.31	0.17	0.91
ENSMUSG00000049281	chr9:40288374-40288453:+@chr9:40288544-40291618:+	0.29	0.09	0.6	0.69	0.21	0.97	0.29	0.09	0.6	0.49	0.11	0.88	-0.4	2.17	-0.2	0.88
ENSMUSG00000073422,ENSMUSG00000092595	chr17:34027840-34027623:-@chr17:34027522-34027406:-	0.52	0.25	0.83	0.33	0.16	0.56	0.52	0.25	0.83	0.15	0.03	0.4	0.19	0.71	0.37	2.34
ENSMUSG00000038520	chr7:44842300-44842186:-@chr7:44842099-44841983:-	0.73	0.45	0.96	0.45	0.2	0.78	0.73	0.45	0.96	0.44	0.21	0.72	0.28	1.39	0.29	1.62
ENSMUSG00000006301	chr1:74291734-74291695:-@chr1:74291468-74291431:-	0.09	0.01	0.34	0.58	0.16	0.99	0.09	0.01	0.34	0.26	0.03	0.73	-0.49	2.42	-0.17	0.53
ENSMUSG00000025507	chr7:141442564-141442151:-@chr7:141441784-141441612:-	0.47	0.33	0.65	0.25	0.15	0.39	0.47	0.33	0.65	0.28	0.12	0.55	0.22	2.03	0.19	0.86
ENSMUSG00000078765	chr7:30564203-30564394:+@chr7:30564474-30564607:+	0.91	0.73	1	0.57	0.24	0.88	0.91	0.73	1	0.7	0.3	0.96	0.34	2.22	0.21	0.64
ENSMUSG00000000538	chr11:60241893-60241818:-@chr11:60241345-60240570:-	0.72	0.35	0.98	0.5	0.08	0.89	0.72	0.35	0.98	0.42	0.1	0.9	0.22	1.11	0.3	1.74
ENSMUSG00000029844	chr6:52158317-52157865:-@chr6:52157661-52157567:-	0.73	0.47	0.96	0.65	0.31	0.92	0.73	0.47	0.96	0.37	0.11	0.74	0.08	0.62	0.36	2.22
ENSMUSG00000036054	chr8:70260469-70260589:+@chr8:70261231-70261317:+	0.64	0.49	0.79	0.44	0.25	0.69	0.64	0.49	0.79	0.42	0.27	0.59	0.2	0.97	0.22	1.82
ENSMUSG00000003581	chr11:4139739-4139858:+@chr11:4139935-4140078:+	0.4	0.21	0.62	0.14	0.04	0.28	0.4	0.21	0.62	0.25	0.11	0.42	0.26	2.24	0.15	0.55
ENSMUSG00000015126	chr17:25240444-25240642:+@chr17:25241064-25241257:+	0.86	0.72	0.98	0.7	0.55	0.86	0.86	0.72	0.98	0.6	0.44	0.83	0.16	0.8	0.26	1.94
ENSMUSG00000004815	chr5:108650379-108650201:-@chr5:108649925-108649825:-	0.32	0.16	0.52	0.44	0.15	0.81	0.32	0.16	0.52	0.66	0.35	0.92	-0.12	0.65	-0.34	2.07
ENSMUSG00000040940	chr7:24918520-24918531:+@chr7:24919184-24919351:+	0.68	0.42	0.89	0.37	0.15	0.67	0.68	0.42	0.89	0.5	0.16	0.88	0.31	1.71	0.18	0.79
ENSMUSG00000036185	chr17:35026457-35026338:-@chr17:35026147-35025973:-	0.62	0.28	0.9	0.3	0.09	0.66	0.62	0.28	0.9	0.39	0.17	0.63	0.32	1.5	0.23	0.97
ENSMUSG00000074903	chr7:39588931-39589134:+@chr7:39589228-39589351:+	0.84	0.52	0.99	0.77	0.51	0.98	0.84	0.52	0.99	0.5	0.18	0.83	0.07	0.63	0.34	1.83
ENSMUSG00000027284	chr2:120730099-120729930:-@chr2:120729802-120729689:-	0.27	0.13	0.44	0.57	0.29	0.85	0.27	0.13	0.44	0.44	0.22	0.68	-0.3	1.65	-0.17	0.75
ENSMUSG00000005150	chr8:85080225-85080054:-@chr8:85079837-85079789:-	0.85	0.58	0.98	0.53	0.3	0.8	0.85	0.58	0.98	0.73	0.45	0.91	0.32	1.87	0.12	0.49
ENSMUSG00000055692	chr16:17277342-17277592:+@chr16:17277669-17277891:+	0.47	0.12	0.88	0.18	0	0.48	0.47	0.12	0.88	0.23	0.03	0.64	0.29	1.06	0.24	1.25
ENSMUSG00000064307	chr7:101913583-101913435:-@chr7:101913212-101912989:-	0.83	0.53	0.98	0.68	0.41	0.96	0.83	0.53	0.98	0.54	0.28	0.8	0.15	0.74	0.29	1.54
ENSMUSG00000053929	chr15:76659736-76659710:-@chr15:76659439-76659219:-	0.79	0.53	0.98	0.54	0.26	0.91	0.79	0.53	0.98	0.48	0.24	0.77	0.25	0.84	0.31	1.41
ENSMUSG00000019823	chr10:41478010-41478314:+@chr10:41478428-41478635:+	0.04	0.01	0.13	0.24	0.02	0.85	0.04	0.01	0.13	0.24	0.07	0.48	-0.2	0.52	-0.2	1.73
ENSMUSG00000001520	chr6:128407686-128407738:+@chr6:128407984-128408932:+	0.49	0.21	0.86	0.71	0.31	1	0.49	0.21	0.86	0.75	0.49	0.95	-0.22	1.07	-0.26	1.14
ENSMUSG00000055923	chr5:76888834-76888593:-@chr5:76888136-76888030:-	0.09	0.03	0.18	0.4	0.11	0.74	0.09	0.03	0.18	0.32	0.1	0.7	-0.31	1.33	-0.23	0.86
ENSMUSG00000050855	chr7:29846960-29846834:-@chr7:29846564-29846469:-	0.78	0.49	0.98	0.55	0.26	0.87	0.78	0.49	0.98	0.46	0.16	0.89	0.23	0.93	0.32	1.22
ENSMUSG00000020331	chr10:79734858-79735872:+@chr10:79735979-79736108:+	0.82	0.55	0.97	0.71	0.27	0.96	0.82	0.55	0.97	0.46	0.07	0.83	0.11	0.52	0.36	1.59
ENSMUSG00000023019	chr15:99723191-99723392:+@chr15:99723428-99725005:+	0.5	0.09	0.89	0.83	0.56	0.98	0.5	0.09	0.89	0.74	0.28	0.97	-0.33	1.02	-0.24	1.06
ENSMUSG00000037971	chr9:50764926-50764765:-@chr9:50764290-50764224:-	0.16	0.09	0.27	0.43	0.16	0.92	0.16	0.09	0.27	0.35	0.17	0.62	-0.27	0.98	-0.19	1.1
ENSMUSG00000040356	chr17:34846667-34846522:-@chr17:34846147-34846027:-	0.35	0.2	0.56	0.61	0.36	0.91	0.35	0.2	0.56	0.52	0.17	0.98	-0.26	1.45	-0.17	0.59
ENSMUSG00000029510	chr5:138277487-138276584:-@chr5:138276369-138275929:-	0.35	0.13	0.68	0.47	0.18	0.76	0.35	0.13	0.68	0.63	0.24	0.96	-0.12	0.75	-0.28	1.28
ENSMUSG00000023007	chr15:99304425-99304490:+@chr15:99305408-99305433:+	0.14	0.01	0.44	0.49	0.06	0.91	0.14	0.01	0.44	0.3	0.04	0.74	-0.35	1.32	-0.16	0.66
ENSMUSG00000035086	chr11:101296316-101296194:-@chr11:101295624-101295534:-	0.92	0.75	1	0.63	0.41	0.95	0.92	0.75	1	0.75	0.54	0.93	0.29	1.35	0.17	0.63
NA	chr12:108855294-108855618:+@chr12:108855939-108856815:+	0.19	0.01	0.68	0.32	0.07	0.79	0.19	0.01	0.68	0.49	0.13	0.94	-0.13	0.78	-0.3	1.17
ENSMUSG00000054708	chr10:81640028-81640135:+@chr10:81640768-81640812:+	0.32	0.18	0.55	0.54	0.26	0.84	0.32	0.18	0.55	0.52	0.21	0.87	-0.22	0.97	-0.2	0.87
ENSMUSG00000004947	chr5:136026470-136026607:+@chr5:136028502-136028572:+	0.1	0.05	0.21	0.23	0.07	0.71	0.1	0.05	0.21	0.48	0.11	0.97	-0.13	0.39	-0.38	1.44
ENSMUSG00000022604	chr16:55925070-55924969:-@chr16:55924850-55924361:-	0.8	0.52	0.99	0.57	0.18	0.94	0.8	0.52	0.99	0.52	0.16	0.94	0.23	0.76	0.28	1
ENSMUSG00000031816	chr8:121099152-121098999:-@chr8:121098771-121098708:-	0.73	0.46	0.96	0.5	0.29	0.73	0.73	0.46	0.96	0.53	0.33	0.74	0.23	0.88	0.2	0.88
ENSMUSG00000026791	chr2:32981883-32981721:-@chr2:32981567-32981361:-	0.09	0.02	0.23	0.19	0.06	0.49	0.09	0.02	0.23	0.44	0.09	0.91	-0.1	0.31	-0.35	1.25
ENSMUSG00000078350	chr4:154025621-154025504:-@chr4:154024350-154024067:-	0.09	0.01	0.25	0.35	0.06	0.79	0.09	0.01	0.25	0.35	0.03	0.92	-0.26	0.78	-0.26	0.69
ENSMUSG00000040370	chr6:145214522-145214545:+@chr6:145214765-145215271:+	0.9	0.73	1	0.89	0.63	0.99	0.9	0.73	1	0.52	0.19	0.83	0.01	0.22	0.38	3.21
ENSMUSG00000085042	chr5:135012550-135012430:-@chr5:135012332-135012122:-	0.57	0.38	0.78	0.25	0.06	0.64	0.57	0.38	0.78	0.5	0.23	0.81	0.32	2.37	0.07	0.5
ENSMUSG00000037112	chr9:50895961-50895344:-@chr9:50893389-50892801:-	0.8	0.63	0.97	0.59	0.43	0.77	0.8	0.63	0.97	0.62	0.45	0.82	0.21	1.46	0.18	0.88
ENSMUSG00000024193	chr17:26936287-26936391:+@chr17:26936523-26936680:+	0.34	0.11	0.68	0.48	0.23	0.82	0.34	0.11	0.68	0.59	0.32	0.89	-0.14	0.7	-0.25	1.18
ENSMUSG00000041991	chr3:93322595-93329297:+@chr3:93329829-93333570:+	0.9	0.69	0.98	0.81	0.52	1	0.9	0.69	0.98	0.6	0.23	0.97	0.09	0.4	0.3	0.99
ENSMUSG00000031342	chrX:166385391-166385481:+@chrX:166386952-166388988:+	0.46	0.31	0.64	0.5	0.29	0.73	0.46	0.31	0.64	0.81	0.55	0.99	-0.04	0.42	-0.35	3.7
ENSMUSG00000000134	chrX:7766555-7766855:+@chrX:7767439-7767684:+	0.06	0.05	0.08	0.31	0.25	0.38	0.06	0.05	0.08	0.19	0.15	0.25	-0.25	1000000000000	-0.13	1000000000000
ENSMUSG00000027422	chr2:143990266-143989660:-@chr2:143988305-143988148:-	0.91	0.87	0.96	0.68	0.63	0.73	0.91	0.87	0.96	0.76	0.71	0.81	0.23	1000000000000	0.15	1876.87
ENSMUSG00000027422	chr2:143990266-143989718:-@chr2:143988301-143988148:-	0.88	0.84	0.92	0.65	0.61	0.7	0.88	0.84	0.92	0.73	0.69	0.78	0.23	1000000000000	0.15	1764.01
ENSMUSG00000037112	chr9:50894081-50893958:-@chr9:50893389-50892801:-	0.88	0.72	0.99	0.74	0.54	0.91	0.88	0.72	0.99	0.64	0.46	0.81	0.14	0.69	0.24	2.92
NA	chr9:57147057-57146878:-@chr9:57146688-57146601:-	0.92	0.75	0.99	0.65	0.38	0.93	0.92	0.75	0.99	0.81	0.5	0.97	0.27	1.62	0.11	0.38
ENSMUSG00000029032	chr4:154282912-154282760:-@chr4:154282645-154282516:-	0.12	0	0.45	0.32	0.09	0.76	0.12	0	0.45	0.3	0.07	0.78	-0.2	1	-0.18	0.81
ENSMUSG00000040701	chr14:55101522-55101395:-@chr14:55101175-55101071:-	0.12	0.06	0.22	0.32	0.11	0.64	0.12	0.06	0.22	0.3	0.13	0.54	-0.2	0.88	-0.18	0.82
ENSMUSG00000032842	chr17:46324914-46323693:-@chr17:46323579-46323352:-	0.21	0.03	0.54	0.36	0.02	0.86	0.21	0.03	0.54	0.44	0.04	0.99	-0.15	0.78	-0.23	0.82
ENSMUSG00000053929	chr15:76659736-76659656:-@chr15:76659439-76659219:-	0.87	0.71	0.98	0.69	0.41	0.92	0.87	0.71	0.98	0.67	0.37	0.95	0.18	0.72	0.2	0.76
ENSMUSG00000025722	chr7:80893341-80892976:-@chr7:80891909-80890724:-	0.42	0.37	0.47	0.22	0.18	0.27	0.42	0.37	0.47	0.25	0.2	0.3	0.2	1000000000000	0.17	477637
ENSMUSG00000027422	chr2:143990266-143989718:-@chr2:143988241-143988148:-	0.87	0.83	0.92	0.65	0.6	0.7	0.87	0.83	0.92	0.72	0.67	0.77	0.22	1000000000000	0.15	3475.19
ENSMUSG00000030468	chr7:43409243-43411206:+@chr7:43411414-43411461:+	0.66	0.47	0.85	0.64	0.45	0.82	0.66	0.47	0.85	0.31	0.18	0.48	0.02	0.36	0.35	7.61
ENSMUSG00000029359	chr5:118056377-118056438:+@chr5:118056537-118056644:+	0.08	0.02	0.17	0.32	0.16	0.55	0.08	0.02	0.17	0.21	0.07	0.38	-0.24	3.17	-0.13	0.56
ENSMUSG00000096972	chr2:169888503-169884166:-@chr2:169883958-169883512:-	0.27	0.02	0.79	0.22	0.01	0.6	0.27	0.02	0.79	0.69	0.32	0.93	0.05	0.61	-0.42	2.42
ENSMUSG00000030337	chr6:125219586-125219637:+@chr6:125220050-125222306:+	0.54	0.27	0.92	0.84	0.51	0.99	0.54	0.27	0.92	0.61	0.29	0.91	-0.3	1.45	-0.07	0.59
ENSMUSG00000038886	chr7:80370929-80370732:-@chr7:80369745-80369593:-	0.23	0.14	0.36	0.35	0.18	0.63	0.23	0.14	0.36	0.48	0.27	0.72	-0.12	0.39	-0.25	1.6
ENSMUSG00000032182	chr9:21592831-21592727:-@chr9:21592588-21592528:-	0.93	0.81	1	0.8	0.55	0.97	0.93	0.81	1	0.69	0.39	0.92	0.13	0.45	0.24	1.39
ENSMUSG00000035713	chr7:97312625-97312252:-@chr7:97311874-97311353:-	0.9	0.73	0.99	0.7	0.35	0.97	0.9	0.73	0.99	0.73	0.41	0.99	0.2	0.71	0.17	0.68
NA	chr7:55962493-55962396:-@chr7:55961572-55961452:-	0.41	0.28	0.57	0.27	0.15	0.45	0.41	0.28	0.57	0.19	0.12	0.29	0.14	0.62	0.22	5.81
ENSMUSG00000043929	chrX:94252415-94253126:+@chrX:94253940-94255968:+	0.43	0.32	0.56	0.21	0.09	0.36	0.43	0.32	0.56	0.29	0.16	0.44	0.22	2.95	0.14	0.63
ENSMUSG00000063268	chr15:76243440-76243347:-@chr15:76243242-76243064:-	0.21	0.08	0.4	0.26	0.11	0.45	0.21	0.08	0.4	0.52	0.25	0.79	-0.05	0.33	-0.31	2.34
NA	chrX:166385391-166385481:+@chrX:166386952-166389033:+	0.48	0.32	0.7	0.53	0.31	0.79	0.48	0.32	0.7	0.79	0.52	0.98	-0.05	0.4	-0.31	2.11
ENSMUSG00000078716	chr4:43690027-43691420:+@chr4:43691452-43692392:+	0.36	0.03	0.73	0.53	0.12	0.89	0.36	0.03	0.73	0.55	0.07	1	-0.17	0.72	-0.19	1.01
ENSMUSG00000037594	chr12:112808975-112809016:+@chr12:112809198-112809808:+	0.71	0.47	0.91	0.6	0.23	0.87	0.71	0.47	0.91	0.46	0.17	0.9	0.11	0.59	0.25	1.02
ENSMUSG00000032271	chr9:48592362-48592314:-@chr9:48592182-48591877:-	0.78	0.53	0.97	0.58	0.29	0.9	0.78	0.53	0.97	0.62	0.34	0.92	0.2	0.79	0.16	0.78
ENSMUSG00000003575	chr8:70397954-70397746:-@chr8:70393055-70392922:-	0.24	0.13	0.41	0.37	0.2	0.59	0.24	0.13	0.41	0.47	0.24	0.81	-0.13	0.5	-0.23	0.94
ENSMUSG00000004815	chr5:108653219-108653181:-@chr5:108652509-108652394:-	0.28	0.14	0.51	0.41	0.2	0.69	0.28	0.14	0.51	0.51	0.16	0.86	-0.13	0.48	-0.23	0.91
ENSMUSG00000024170	chr17:25103771-25103580:-@chr17:25101704-25101640:-	0.15	0.1	0.2	0.17	0.1	0.28	0.15	0.1	0.2	0.48	0.23	0.85	-0.02	0.15	-0.33	5.04
ENSMUSG00000056260	chr3:106731663-106732614:+@chr3:106733116-106733142:+	0.95	0.86	1	0.68	0.47	0.88	0.95	0.86	1	0.87	0.65	1	0.27	3.07	0.08	0.23
ENSMUSG00000037907	chr11:77472378-77472302:-@chr11:77471878-77470487:-	0.92	0.73	1	0.58	0.32	0.87	0.92	0.73	1	0.91	0.74	1	0.34	2.54	0.01	0.19
ENSMUSG00000001986	chrX:41654006-41654253:+@chrX:41654810-41654924:+	0.35	0.14	0.76	0.07	0.01	0.2	0.35	0.14	0.76	0.28	0.12	0.48	0.28	2.09	0.07	0.39
ENSMUSG00000018160	chr11:98158469-98158329:-@chr11:98153125-98152155:-	0.79	0.73	0.85	0.6	0.54	0.66	0.79	0.73	0.85	0.63	0.57	0.69	0.19	775.55	0.16	20.35
ENSMUSG00000059939	chr4:156121933-156122028:+@chr4:156122351-156122416:+	0.77	0.62	0.89	0.68	0.44	0.88	0.77	0.62	0.89	0.51	0.33	0.71	0.09	0.37	0.26	2.5
ENSMUSG00000035969	chr4:43426228-43426365:+@chr4:43426448-43427088:+	0.69	0.54	0.82	0.45	0.25	0.64	0.69	0.54	0.82	0.58	0.4	0.76	0.24	1.84	0.11	0.4
ENSMUSG00000043311	chr17:35126922-35128185:+@chr17:35128373-35128855:+	0.57	0.29	0.85	0.79	0.45	0.97	0.57	0.29	0.85	0.7	0.39	0.97	-0.22	0.84	-0.13	0.83
ENSMUSG00000073684	chr4:155249966-155250062:+@chr4:155250507-155250650:+	0.89	0.71	1	0.83	0.6	0.99	0.89	0.71	1	0.6	0.31	0.95	0.06	0.33	0.29	1.31
ENSMUSG00000038335	chr11:74907824-74907964:+@chr11:74908048-74908120:+	0.33	0.23	0.47	0.45	0.26	0.72	0.33	0.23	0.47	0.56	0.33	0.78	-0.12	0.47	-0.23	1.11
ENSMUSG00000054362	chr4:106591687-106591516:-@chr4:106591009-106590909:-	0.86	0.65	0.97	0.66	0.3	0.99	0.86	0.65	0.97	0.71	0.34	0.95	0.2	0.78	0.15	0.52
ENSMUSG00000002055	chr11:78314164-78314256:+@chr11:78314343-78314456:+	0.32	0.23	0.41	0.21	0.11	0.33	0.32	0.23	0.41	0.09	0.04	0.16	0.11	0.5	0.23	111.74
ENSMUSG00000036555	chr5:140677506-140677416:-@chr5:140674360-140674337:-	0.35	0.08	0.74	0.02	0	0.05	0.35	0.08	0.74	0.34	0.02	0.85	0.33	3.34	0.01	0.8
ENSMUSG00000033416	chr10:75510123-75510032:-@chr10:75509704-75509592:-	0.79	0.56	0.98	0.56	0.25	0.9	0.79	0.56	0.98	0.68	0.39	0.97	0.23	1.2	0.11	0.69
ENSMUSG00000020654	chr12:4210772-4210891:+@chr12:4211482-4211605:+	0.1	0.05	0.19	0.36	0.15	0.75	0.1	0.05	0.19	0.18	0.08	0.34	-0.26	1.43	-0.08	0.28
ENSMUSG00000021917	chr14:31000903-31000844:-@chr14:31000760-31000678:-	0.36	0.19	0.61	0.11	0.04	0.23	0.36	0.19	0.61	0.27	0.13	0.46	0.25	5.2	0.09	0.37
ENSMUSG00000000916	chr5:135375275-135375485:+@chr5:135375555-135375698:+	0.1	0.05	0.17	0.26	0.11	0.46	0.1	0.05	0.17	0.28	0.13	0.48	-0.16	1.11	-0.18	1.31
ENSMUSG00000029674	chr5:134661858-134661793:-@chr5:134661553-134661389:-	0.57	0.28	0.85	0.42	0.03	0.82	0.57	0.28	0.85	0.38	0.01	0.93	0.15	0.69	0.19	1.26
ENSMUSG00000035228	chr7:5059496-5059705:+@chr7:5060207-5060785:+	0.53	0.27	0.88	0.35	0.1	0.77	0.53	0.27	0.88	0.37	0.16	0.66	0.18	1.02	0.16	0.75
ENSMUSG00000024830	chr19:4158919-4158829:-@chr19:4158717-4158610:-	0.16	0.06	0.31	0.29	0.11	0.64	0.16	0.06	0.31	0.37	0.16	0.58	-0.13	0.46	-0.21	0.94
ENSMUSG00000026958	chr2:25355721-25355558:-@chr2:25355028-25354893:-	0.74	0.63	0.83	0.58	0.46	0.7	0.74	0.63	0.83	0.57	0.44	0.71	0.16	1.17	0.17	1.4
ENSMUSG00000038671	chr2:181364398-181364311:-@chr2:181364195-181364014:-	0.75	0.52	0.95	0.42	0.21	0.74	0.75	0.52	0.95	0.75	0.46	0.95	0.33	1.71	0	0.49
ENSMUSG00000028952	chr4:152027059-152026388:-@chr4:152026019-152025778:-	0.51	0.38	0.65	0.37	0.21	0.57	0.51	0.38	0.65	0.32	0.18	0.47	0.14	0.67	0.19	1.35
ENSMUSG00000009995	chrX:74288178-74288219:+@chrX:74288451-74288513:+	0.33	0.17	0.55	0.2	0.08	0.39	0.33	0.17	0.55	0.13	0.04	0.32	0.13	0.56	0.2	1.21
ENSMUSG00000038119	chr9:35463875-35464029:+@chr9:35464141-35464228:+	0.88	0.64	0.99	0.71	0.37	0.93	0.88	0.64	0.99	0.72	0.35	0.96	0.17	0.87	0.16	0.66
ENSMUSG00000031442	chr8:13018696-13018799:+@chr8:13018886-13020509:+	0.76	0.43	0.97	0.57	0.09	0.96	0.76	0.43	0.97	0.62	0.14	0.94	0.19	0.7	0.14	0.68
ENSMUSG00000034422	chr16:35841630-35841409:-@chr16:35841321-35840722:-	0.34	0.17	0.55	0.57	0.23	0.91	0.34	0.17	0.55	0.44	0.22	0.72	-0.23	0.86	-0.1	0.48
ENSMUSG00000031939	chr9:15311527-15311695:+@chr9:15311909-15312104:+	0.73	0.66	0.8	0.61	0.53	0.69	0.73	0.66	0.8	0.52	0.44	0.61	0.12	1.27	0.21	84.98
ENSMUSG00000020282	chr11:32210758-32210658:-@chr11:32210551-32210398:-	0.29	0.15	0.46	0.2	0.08	0.36	0.29	0.15	0.46	0.05	0	0.16	0.09	0.38	0.24	5.55
ENSMUSG00000071337	chr6:86423606-86423671:+@chr6:86424345-86424420:+	0.74	0.51	0.94	0.59	0.29	0.91	0.74	0.51	0.94	0.56	0.32	0.81	0.15	0.97	0.18	0.84
ENSMUSG00000003778	chr18:34609949-34609805:-@chr18:34608627-34608418:-	0.35	0.31	0.38	0.46	0.39	0.54	0.35	0.31	0.38	0.56	0.46	0.65	-0.11	2.93	-0.21	50101.5
ENSMUSG00000034744	chr6:83796907-83796991:+@chr6:83797177-83797275:+	0.29	0.18	0.43	0.18	0.1	0.3	0.29	0.18	0.43	0.08	0.04	0.14	0.11	0.43	0.21	26.35
NA	chr18:36681528-36681765:+@chr18:36681874-36683862:+	0.78	0.73	0.84	0.62	0.52	0.73	0.78	0.73	0.84	0.62	0.53	0.72	0.16	3.92	0.16	5.47
ENSMUSG00000041774	chr16:17146967-17147146:+@chr16:17147233-17147392:+	0.11	0.05	0.21	0.37	0.19	0.57	0.11	0.05	0.21	0.17	0.04	0.33	-0.26	6.23	-0.06	0.24
ENSMUSG00000051786	chr15:89100784-89100585:-@chr15:89100503-89099098:-	0.03	0	0.1	0.11	0.02	0.29	0.03	0	0.1	0.27	0.11	0.51	-0.08	0.25	-0.24	4.74
ENSMUSG00000025155	chr11:120796389-120795939:-@chr11:120795723-120795477:-	0.23	0.16	0.31	0.41	0.29	0.55	0.23	0.16	0.31	0.37	0.23	0.56	-0.18	3.22	-0.14	0.73
ENSMUSG00000053332	chr1:161036208-161036244:+@chr1:161036549-161036579:+	0.45	0.03	0.99	0.5	0.13	0.93	0.45	0.03	0.99	0.72	0.23	0.99	-0.05	1.13	-0.27	1.98
ENSMUSG00000096276	chr12:87958625-87959200:+@chr12:87959832-87960672:+	0.45	0.03	0.99	0.59	0.2	0.97	0.45	0.03	0.99	0.63	0.22	0.98	-0.14	1.66	-0.18	1.15
ENSMUSG00000038520	chr7:44842300-44842203:-@chr7:44842099-44841983:-	0.33	0.22	0.48	0.16	0.07	0.28	0.33	0.22	0.48	0.18	0.07	0.35	0.17	1.7	0.15	0.72
ENSMUSG00000049482,ENSMUSG00000092329	chr8:122480902-122481005:+@chr8:122481133-122481224:+	0.77	0.53	0.95	0.52	0.27	0.81	0.77	0.53	0.95	0.7	0.34	0.99	0.25	1.11	0.07	0.51
ENSMUSG00000027247	chr2:91651498-91651654:+@chr2:91651764-91651823:+	0.74	0.44	0.95	0.54	0.27	0.77	0.74	0.44	0.95	0.62	0.24	0.96	0.2	0.77	0.12	0.74
ENSMUSG00000040370	chr6:145214522-145214784:+@chr6:145215184-145215271:+	0.66	0.45	0.85	0.83	0.55	0.98	0.66	0.45	0.85	0.81	0.52	0.97	-0.17	0.7	-0.15	0.63
ENSMUSG00000005150	chr8:85080225-85080061:-@chr8:85079691-85079581:-	0.54	0.38	0.75	0.25	0.16	0.36	0.54	0.38	0.75	0.51	0.32	0.74	0.29	20.34	0.03	0.38
ENSMUSG00000032827	chr6:5134017-5134174:+@chr6:5134689-5134932:+	0.8	0.62	0.94	0.63	0.33	0.89	0.8	0.62	0.94	0.66	0.34	0.96	0.17	0.7	0.14	0.55
ENSMUSG00000040506	chr2:91772291-91772437:+@chr2:91772711-91773747:+	0.28	0.2	0.38	0.1	0.05	0.17	0.28	0.2	0.38	0.15	0.09	0.24	0.18	23.89	0.13	1.42
ENSMUSG00000034863	chr8:71483141-71482980:-@chr8:71482659-71482507:-	0.08	0.03	0.16	0.13	0.05	0.26	0.08	0.03	0.16	0.34	0.16	0.59	-0.05	0.2	-0.26	7.24
ENSMUSG00000045411	chr7:44247251-44247416:+@chr7:44248252-44248295:+	0.91	0.83	0.97	0.76	0.63	0.88	0.91	0.83	0.97	0.75	0.62	0.87	0.15	1.83	0.16	1.56
ENSMUSG00000032363	chr9:90193025-90193865:+@chr9:90194043-90194269:+	0.73	0.41	0.95	0.77	0.45	0.98	0.73	0.41	0.95	0.38	0.02	0.76	-0.04	0.63	0.35	1.69
ENSMUSG00000038828	chr5:30872687-30872768:+@chr5:30872861-30872904:+	0.44	0.16	0.81	0.31	0.08	0.65	0.44	0.16	0.81	0.26	0.04	0.86	0.13	0.78	0.18	1.21
ENSMUSG00000020362	chr11:49685352-49685248:-@chr11:49685155-49685087:-	0.46	0.35	0.58	0.27	0.12	0.47	0.46	0.35	0.58	0.34	0.19	0.55	0.19	1.22	0.12	0.53
ENSMUSG00000022580	chr15:75711791-75711898:+@chr15:75712292-75712451:+	0.77	0.54	0.96	0.53	0.26	0.84	0.77	0.54	0.96	0.7	0.37	0.95	0.24	1.04	0.07	0.47
ENSMUSG00000038418	chr18:34861207-34861333:+@chr18:34861370-34861786:+	0.95	0.85	1	0.76	0.48	0.99	0.95	0.85	1	0.83	0.54	0.99	0.19	0.74	0.12	0.32
ENSMUSG00000036073,ENSMUSG00000073889	chr4:41756513-41756561:+@chr4:41756939-41756995:+	0.85	0.64	0.98	0.62	0.32	0.9	0.85	0.64	0.98	0.78	0.49	0.97	0.23	1.15	0.07	0.39
ENSMUSG00000039637	chr16:4634907-4634762:-@chr16:4634681-4634589:-	0.33	0.11	0.69	0.23	0.03	0.5	0.33	0.11	0.69	0.13	0.03	0.3	0.1	0.47	0.2	0.68
ENSMUSG00000004896	chr3:87927117-87927055:-@chr3:87926874-87926731:-	0.35	0.24	0.47	0.3	0.17	0.46	0.35	0.24	0.47	0.1	0.05	0.19	0.05	0.27	0.25	43.18
ENSMUSG00000040356	chr17:34846667-34846522:-@chr17:34846173-34846027:-	0.1	0.06	0.14	0.28	0.17	0.41	0.1	0.06	0.14	0.22	0.11	0.38	-0.18	14.32	-0.12	0.73
ENSMUSG00000020692	chr11:82904136-82904090:-@chr11:82903133-82902995:-	0.27	0.19	0.37	0.12	0.07	0.2	0.27	0.19	0.37	0.12	0.06	0.21	0.15	3.61	0.15	3.2
ENSMUSG00000061410	chr8:121609315-121609221:-@chr8:121609134-121609080:-	0.09	0.02	0.22	0.39	0.18	0.65	0.09	0.02	0.22	0.09	0.01	0.26	-0.3	4.12	0	0.19
NA	chr19:8723487-8723506:+@chr19:8724141-8724189:+	0.62	0.11	0.96	0.41	0.04	0.82	0.62	0.11	0.96	0.53	0.12	0.91	0.21	1.09	0.09	1
ENSMUSG00000022550	chr15:76594153-76594284:+@chr15:76594364-76594447:+	0.23	0.12	0.39	0.08	0.01	0.22	0.23	0.12	0.39	0.08	0.01	0.23	0.15	0.83	0.15	1.11
ENSMUSG00000025283	chrX:155215684-155215601:-@chrX:155215230-155215121:-	0.56	0.42	0.74	0.38	0.26	0.53	0.56	0.42	0.74	0.44	0.31	0.58	0.18	1.21	0.12	0.49
ENSMUSG00000029625	chr5:145177230-145177302:+@chr5:145178758-145178928:+	0.51	0.39	0.65	0.69	0.45	0.93	0.51	0.39	0.65	0.63	0.39	0.91	-0.18	0.74	-0.12	0.45
NA	chr8:22661492-22661402:-@chr8:22660459-22659205:-	0.27	0.21	0.32	0.14	0.09	0.19	0.27	0.21	0.32	0.11	0.07	0.17	0.13	12.95	0.16	335.6
ENSMUSG00000030871	chr7:122048574-122048102:-@chr7:122046732-122046624:-	0.42	0.34	0.52	0.29	0.22	0.37	0.42	0.34	0.52	0.26	0.19	0.35	0.13	1.42	0.16	3.81
ENSMUSG00000002109	chr2:91234951-91234815:-@chr2:91234299-91234108:-	0.61	0.47	0.78	0.33	0.17	0.56	0.61	0.47	0.78	0.6	0.36	0.83	0.28	3.26	0.01	0.44
ENSMUSG00000026958	chr2:25356142-25356029:-@chr2:25355953-25355814:-	0.29	0.2	0.39	0.56	0.35	0.78	0.29	0.2	0.39	0.31	0.19	0.45	-0.27	2.43	-0.02	0.22
ENSMUSG00000096199	chr12:4236363-4237100:+@chr12:4237148-4240123:+	0.66	0.33	0.89	0.63	0.16	0.95	0.66	0.33	0.89	0.4	0.02	0.75	0.03	0.72	0.26	1.51
NA	chrX:103468036-103466379:-@chrX:103460710-103460373:-	0.89	0.7	0.99	0.61	0.38	0.86	0.89	0.7	0.99	0.88	0.65	0.99	0.28	1.87	0.01	0.24
ENSMUSG00000037326	chr17:25960563-25960337:-@chr17:25960231-25960065:-	0.77	0.51	0.96	0.45	0.18	0.87	0.77	0.51	0.96	0.8	0.45	0.99	0.32	1.46	-0.03	0.44
ENSMUSG00000024787	chr19:6124188-6124153:-@chr19:6123950-6123830:-	0.28	0.15	0.45	0.12	0.01	0.35	0.28	0.15	0.45	0.15	0.04	0.3	0.16	0.95	0.13	0.68
ENSMUSG00000031827	chr8:119810355-119810101:-@chr8:119810049-119809225:-	0.93	0.81	0.99	0.86	0.72	0.96	0.93	0.81	0.99	0.71	0.49	0.95	0.07	0.28	0.22	1.24
ENSMUSG00000033276	chr1:74633507-74633654:+@chr1:74634010-74634756:+	0.57	0.34	0.82	0.41	0.14	0.73	0.57	0.34	0.82	0.44	0.14	0.84	0.16	0.7	0.13	0.76
ENSMUSG00000026565	chr1:165876048-165875903:-@chr1:165875516-165875457:-	0.94	0.84	0.99	0.82	0.63	0.98	0.94	0.84	0.99	0.77	0.58	0.94	0.12	0.38	0.17	0.93
ENSMUSG00000059866	chr5:34499736-34499488:-@chr5:34499299-34499180:-	0.24	0.12	0.4	0.39	0.17	0.65	0.24	0.12	0.4	0.38	0.15	0.68	-0.15	0.64	-0.14	0.56
ENSMUSG00000054874	chr19:5687218-5687119:-@chr19:5686666-5686627:-	0.07	0.03	0.12	0.22	0.08	0.43	0.07	0.03	0.12	0.21	0.04	0.61	-0.15	0.86	-0.14	0.34
ENSMUSG00000022843	chr16:20713459-20713328:-@chr16:20713008-20712880:-	0.17	0.1	0.27	0.31	0.16	0.53	0.17	0.1	0.27	0.32	0.12	0.71	-0.14	0.61	-0.15	0.44
ENSMUSG00000024137	chr17:24447210-24447090:-@chr17:24446841-24446782:-	0.53	0.33	0.79	0.24	0.09	0.46	0.53	0.33	0.79	0.53	0.28	0.81	0.29	2.07	0	0.49
ENSMUSG00000028496	chr4:87841389-87841269:-@chr4:87841246-87837419:-	0.77	0.44	0.96	0.79	0.48	0.97	0.77	0.44	0.96	0.46	0.07	0.87	-0.02	0.34	0.31	1.15
ENSMUSG00000033540	chr5:108680111-108680206:+@chr5:108680295-108680497:+	0.21	0.08	0.38	0.25	0.07	0.56	0.21	0.08	0.38	0.46	0.21	0.73	-0.04	0.46	-0.25	0.94
ENSMUSG00000054362	chr4:106591687-106591431:-@chr4:106591009-106590909:-	0.89	0.71	0.99	0.71	0.33	0.98	0.89	0.71	0.99	0.78	0.42	1	0.18	0.63	0.11	0.57
ENSMUSG00000026864	chr2:34772090-34772146:+@chr2:34772229-34772446:+	0.4	0.37	0.43	0.28	0.25	0.31	0.4	0.37	0.43	0.24	0.21	0.27	0.12	1.51892e+08	0.16	1000000000000
ENSMUSG00000031570	chr8:25721662-25721786:+@chr8:25722430-25722600:+	0.61	0.46	0.76	0.6	0.39	0.82	0.61	0.46	0.76	0.34	0.24	0.47	0.01	0.37	0.27	5.99
ENSMUSG00000022999	chr15:98908921-98908849:-@chr15:98908759-98908520:-	0.21	0.11	0.34	0.09	0.02	0.2	0.21	0.11	0.34	0.05	0.01	0.14	0.12	0.67	0.16	4.59
ENSMUSG00000015126	chr17:25240444-25240663:+@chr17:25240999-25241257:+	0.86	0.72	0.97	0.85	0.68	0.99	0.86	0.72	0.97	0.59	0.43	0.75	0.01	0.24	0.27	4.85
ENSMUSG00000026269	chr1:92916711-92916946:+@chr1:92917147-92917746:+	0.26	0.14	0.4	0.18	0.05	0.41	0.26	0.14	0.4	0.06	0.01	0.2	0.08	0.4	0.2	4.56
ENSMUSG00000093674	chr10:128548973-128548949:-@chr10:128548680-128548658:-	0.6	0.15	1	0.41	0.02	0.92	0.6	0.15	1	0.51	0.02	0.94	0.19	1.06	0.09	1.25
ENSMUSG00000022960	chr16:91682821-91682743:-@chr16:91682620-91682516:-	0.16	0.08	0.25	0.23	0.08	0.42	0.16	0.08	0.25	0.37	0.19	0.6	-0.07	0.31	-0.21	1.7
ENSMUSG00000036473	chr17:24181395-24181225:-@chr17:24180676-24175431:-	0.51	0.42	0.62	0.4	0.26	0.58	0.51	0.42	0.62	0.34	0.21	0.51	0.11	0.5	0.17	1.11
ENSMUSG00000025766	chr3:41756049-41756129:+@chr3:41758624-41758930:+	0.7	0.56	0.86	0.53	0.31	0.81	0.7	0.56	0.86	0.59	0.37	0.9	0.17	0.91	0.11	0.58
ENSMUSG00000033728	chr15:76712867-76713220:+@chr15:76713816-76713985:+	0.76	0.57	0.93	0.64	0.47	0.87	0.76	0.57	0.93	0.6	0.41	0.85	0.12	0.56	0.16	0.73
ENSMUSG00000025142	chr11:120708930-120708999:+@chr11:120709112-120709246:+	0.73	0.57	0.89	0.6	0.38	0.82	0.73	0.57	0.89	0.58	0.38	0.82	0.13	0.55	0.15	0.72
ENSMUSG00000090077,ENSMUSG00000027582	chr2:181382194-181382314:+@chr2:181382487-181382544:+	0.38	0.26	0.51	0.51	0.31	0.71	0.38	0.26	0.51	0.53	0.28	0.81	-0.13	0.6	-0.15	0.63
ENSMUSG00000033728	chr15:76712867-76713220:+@chr15:76713964-76713985:+	0.87	0.67	0.99	0.76	0.56	0.94	0.87	0.67	0.99	0.7	0.49	0.91	0.11	0.46	0.17	0.74
ENSMUSG00000037773	chr2:130422704-130422466:-@chr2:130422375-130422225:-	0.1	0.02	0.24	0.2	0.04	0.45	0.1	0.02	0.24	0.28	0.03	0.76	-0.1	0.39	-0.18	0.56
ENSMUSG00000039648	chr2:30185753-30185667:-@chr2:30185569-30185126:-	0.1	0.02	0.23	0.39	0.1	0.71	0.1	0.02	0.23	0.09	0	0.3	-0.29	1.12	0.01	0.21
NA	chr1:106029752-106031233:+@chr1:106032096-106034079:+	0.47	0.4	0.54	0.33	0.24	0.43	0.47	0.4	0.54	0.34	0.25	0.42	0.14	1.88	0.13	1.99
ENSMUSG00000055629	chr7:141064641-141064731:+@chr7:141064807-141064907:+	0.32	0.17	0.51	0.28	0.11	0.51	0.32	0.17	0.51	0.09	0	0.23	0.04	0.4	0.23	2.63
ENSMUSG00000026577	chr1:164307489-164307442:-@chr1:164307354-164307147:-	0.71	0.5	0.88	0.4	0.16	0.7	0.71	0.5	0.88	0.75	0.48	0.94	0.31	2.21	-0.04	0.55
ENSMUSG00000020359	chr11:51592006-51592093:+@chr11:51592169-51592285:+	0.46	0.25	0.68	0.22	0.06	0.45	0.46	0.25	0.68	0.43	0.13	0.77	0.24	1.92	0.03	0.57
ENSMUSG00000071657	chr19:8845171-8845314:+@chr19:8846249-8846324:+	0.36	0.24	0.51	0.25	0.14	0.4	0.36	0.24	0.51	0.2	0.12	0.29	0.11	0.46	0.16	1.51
ENSMUSG00000022556	chr15:76500131-76500196:+@chr15:76500267-76500336:+	0.11	0.04	0.22	0.31	0.16	0.49	0.11	0.04	0.22	0.18	0.07	0.31	-0.2	1.4	-0.07	0.27
ENSMUSG00000070034	chr1:85586295-85586215:-@chr1:85585055-85584903:-	0.22	0.08	0.46	0.22	0.09	0.4	0.22	0.08	0.46	0.49	0.17	0.9	0	0.34	-0.27	1.12
ENSMUSG00000026288	chr1:87715038-87715093:+@chr1:87715277-87715313:+	0.76	0.55	0.95	0.6	0.3	0.88	0.76	0.55	0.95	0.65	0.35	0.91	0.16	0.72	0.11	0.58
ENSMUSG00000028689	chr4:116709240-116709273:+@chr4:116709438-116709619:+	0.33	0.2	0.49	0.2	0.07	0.4	0.33	0.2	0.49	0.19	0.06	0.46	0.13	0.64	0.14	0.65
ENSMUSG00000031570	chr8:25721662-25721786:+@chr8:25722472-25722600:+	0.84	0.64	0.99	0.68	0.45	0.94	0.84	0.64	0.99	0.73	0.45	0.96	0.16	0.71	0.11	0.52
ENSMUSG00000041477	chr6:119214770-119215606:+@chr6:119217902-119217979:+	0.79	0.59	0.95	0.67	0.39	0.92	0.79	0.59	0.95	0.64	0.36	0.94	0.12	0.56	0.15	0.63
ENSMUSG00000006575	chr11:102399615-102399780:+@chr11:102399888-102400045:+	0.28	0.11	0.58	0.11	0.01	0.4	0.28	0.11	0.58	0.18	0.04	0.37	0.17	0.73	0.1	0.43
ENSMUSG00000024906	chr19:5483665-5483635:-@chr19:5483558-5483455:-	0.14	0.05	0.26	0.12	0.04	0.24	0.14	0.05	0.26	0.43	0.15	0.78	0.02	0.24	-0.29	1.21
ENSMUSG00000071660	chr19:8819294-8819021:-@chr19:8818684-8818436:-	0.28	0.24	0.33	0.33	0.25	0.42	0.28	0.24	0.33	0.49	0.39	0.6	-0.05	0.18	-0.21	135.63
ENSMUSG00000026848	chr2:30953752-30954008:+@chr2:30955768-30955953:+	0.38	0.32	0.44	0.27	0.21	0.34	0.38	0.32	0.44	0.23	0.19	0.29	0.11	1.78	0.15	25.39
ENSMUSG00000056260	chr3:106731663-106733142:+@chr3:106734358-106734618:+	0.42	0.36	0.49	0.49	0.36	0.63	0.42	0.36	0.49	0.61	0.5	0.73	-0.07	0.27	-0.19	12.73
ENSMUSG00000004561	chr14:51888742-51888836:+@chr14:51889528-51889635:+	0.38	0.27	0.52	0.3	0.18	0.47	0.38	0.27	0.52	0.2	0.11	0.34	0.08	0.36	0.18	1.5
ENSMUSG00000029071	chr4:155854566-155855025:+@chr4:155855104-155855180:+	0.28	0.17	0.4	0.19	0.06	0.36	0.28	0.17	0.4	0.11	0.03	0.22	0.09	0.36	0.17	1.39
ENSMUSG00000043822	chr10:80343020-80342909:-@chr10:80342699-80342307:-	0.76	0.48	0.97	0.6	0.32	0.88	0.76	0.48	0.97	0.66	0.2	0.96	0.16	0.96	0.1	0.63
ENSMUSG00000039294	chr11:121227284-121227243:-@chr11:121225900-121225804:-	0.21	0.1	0.44	0.09	0.03	0.23	0.21	0.1	0.44	0.07	0.03	0.14	0.12	0.66	0.14	0.79
ENSMUSG00000034863	chr8:71484364-71484268:-@chr8:71483564-71483448:-	0.14	0.08	0.23	0.25	0.13	0.43	0.14	0.08	0.23	0.29	0.16	0.46	-0.11	0.46	-0.15	0.96
ENSMUSG00000029510	chr5:138276338-138276208:-@chr5:138276075-138275929:-	0.21	0.09	0.39	0.42	0.21	0.66	0.21	0.09	0.39	0.26	0.09	0.48	-0.21	0.98	-0.05	0.31
ENSMUSG00000021559	chr13:60760635-60761884:+@chr13:60762357-60763185:+	0.87	0.76	0.95	0.72	0.6	0.86	0.87	0.76	0.95	0.76	0.6	0.91	0.15	0.85	0.11	0.41
ENSMUSG00000014245	chr11:62507727-62507794:+@chr11:62509279-62509372:+	0.78	0.44	0.98	0.7	0.38	0.94	0.78	0.44	0.98	0.6	0.23	0.87	0.08	0.51	0.18	0.72
ENSMUSG00000051517	chr4:43497710-43497582:-@chr4:43497316-43497087:-	0.36	0.22	0.51	0.42	0.23	0.72	0.36	0.22	0.51	0.56	0.22	0.91	-0.06	0.37	-0.2	0.81
ENSMUSG00000038271	chr6:125153042-125153162:+@chr6:125153407-125153502:+	0.29	0.08	0.55	0.18	0.06	0.35	0.29	0.08	0.55	0.14	0.02	0.41	0.11	0.52	0.15	0.56
ENSMUSG00000023961	chr17:44102664-44102116:-@chr17:44102073-44101807:-	0.93	0.81	0.99	0.78	0.43	0.98	0.93	0.81	0.99	0.82	0.45	0.98	0.15	0.47	0.11	0.31
ENSMUSG00000040669	chr6:122322472-122322325:-@chr6:122322083-122321872:-	0.08	0.07	0.09	0.21	0.18	0.25	0.08	0.07	0.09	0.2	0.17	0.24	-0.13	1000000000000	-0.12	1000000000000
ENSMUSG00000046032	chrX:101213864-101213774:-@chrX:101212346-101211961:-	0.64	0.59	0.7	0.49	0.42	0.58	0.64	0.59	0.7	0.54	0.47	0.62	0.15	9.08	0.1	0.92
ENSMUSG00000020883	chr11:98097059-98096929:-@chr11:98095193-98095133:-	0.23	0.16	0.34	0.11	0.07	0.17	0.23	0.16	0.34	0.1	0.07	0.15	0.12	1.53	0.13	4.49
ENSMUSG00000024410	chr18:12183979-12184023:+@chr18:12184239-12184262:+	0.44	0.08	0.89	0.55	0.07	1	0.44	0.08	0.89	0.58	0.03	0.96	-0.11	1	-0.14	1.93
ENSMUSG00000019518	chr5:138172349-138172437:+@chr5:138172787-138172893:+	0.64	0.51	0.78	0.62	0.42	0.82	0.64	0.51	0.78	0.41	0.24	0.63	0.02	0.32	0.23	2
ENSMUSG00000073125	chrX:73195942-73195976:+@chrX:73197353-73198385:+	0.12	0.07	0.18	0.17	0.08	0.3	0.12	0.07	0.18	0.32	0.16	0.53	-0.05	0.21	-0.2	2
ENSMUSG00000033460	chrX:134718370-134718461:+@chrX:134718726-134718818:+	0.26	0.18	0.36	0.5	0.29	0.74	0.26	0.18	0.36	0.27	0.12	0.46	-0.24	1.72	-0.01	0.25
ENSMUSG00000022552	chr15:76348435-76348301:-@chr15:76348222-76348086:-	0.15	0.04	0.32	0.42	0.18	0.72	0.15	0.04	0.32	0.13	0.01	0.33	-0.27	1.57	0.02	0.3
ENSMUSG00000006649	chr7:30481642-30481666:+@chr7:30481741-30481816:+	0.39	0.2	0.62	0.36	0.15	0.63	0.39	0.2	0.62	0.17	0.01	0.44	0.03	0.5	0.22	1.16
ENSMUSG00000027933	chr3:90392105-90391993:-@chr3:90391911-90391380:-	0.91	0.84	0.96	0.77	0.65	0.87	0.91	0.84	0.96	0.8	0.66	0.92	0.14	1.11	0.11	0.46
ENSMUSG00000024926	chr19:5610094-5610018:-@chr19:5609918-5609852:-	0.4	0.24	0.59	0.36	0.13	0.65	0.4	0.24	0.59	0.19	0.05	0.44	0.04	0.52	0.21	1.04
ENSMUSG00000043085	chr4:141616621-141616204:-@chr4:141615135-141614945:-	0.67	0.46	0.93	0.74	0.46	0.95	0.67	0.46	0.93	0.85	0.63	0.97	-0.07	0.61	-0.18	0.93
ENSMUSG00000062963	chr1:171289947-171289855:-@chr1:171289594-171289518:-	0.1	0.06	0.16	0.24	0.12	0.46	0.1	0.06	0.16	0.21	0.11	0.35	-0.14	0.98	-0.11	0.46
ENSMUSG00000062202	chr17:30220570-30220510:-@chr17:30220144-30215524:-	0.93	0.81	1	0.85	0.69	0.96	0.93	0.81	1	0.76	0.56	0.93	0.08	0.28	0.17	0.96
ENSMUSG00000049606	chr5:106638635-106636417:-@chr5:106636323-106635610:-	0.64	0.54	0.74	0.5	0.36	0.64	0.64	0.54	0.74	0.53	0.42	0.67	0.14	0.68	0.11	0.51
ENSMUSG00000011658	chr7:44897520-44897624:+@chr7:44898516-44898700:+	0.4	0.26	0.58	0.62	0.35	0.9	0.4	0.26	0.58	0.43	0.24	0.72	-0.22	0.78	-0.03	0.39
NA	chr13:60760635-60761884:+@chr13:60762357-60763186:+	0.86	0.75	0.95	0.72	0.59	0.85	0.86	0.75	0.95	0.75	0.59	0.9	0.14	0.68	0.11	0.41
ENSMUSG00000009995	chrX:74288451-74288513:+@chrX:74288929-74289019:+	0.92	0.68	1	0.79	0.54	0.96	0.92	0.68	1	0.8	0.48	0.97	0.13	0.55	0.12	0.52
ENSMUSG00000020329	chr10:79738804-79738682:-@chr10:79738210-79738031:-	0.5	0.29	0.72	0.41	0.2	0.66	0.5	0.29	0.72	0.34	0.2	0.54	0.09	0.45	0.16	0.6
ENSMUSG00000031274	chrX:141475419-141475466:+@chrX:141475639-141475815:+	0.7	0.47	0.92	0.82	0.59	0.97	0.7	0.47	0.92	0.83	0.65	0.95	-0.12	0.47	-0.13	0.48
ENSMUSG00000000148	chr5:140712505-140712901:+@chr5:140713053-140713172:+	0.21	0.05	0.53	0.09	0.01	0.27	0.21	0.05	0.53	0.08	0.01	0.24	0.12	0.43	0.13	0.51
ENSMUSG00000045679	chr12:16997856-16997774:-@chr12:16997656-16997634:-	0.09	0.01	0.5	0.18	0	0.77	0.09	0.01	0.5	0.25	0.01	0.94	-0.09	0.37	-0.16	0.56
ENSMUSG00000026565	chr1:165875976-165875903:-@chr1:165875516-165875474:-	0.93	0.77	1	0.86	0.66	0.98	0.93	0.77	1	0.75	0.52	0.97	0.07	0.31	0.18	0.61
ENSMUSG00000037552	chr7:28364632-28364585:-@chr7:28364509-28364471:-	0.08	0.02	0.19	0.1	0.01	0.41	0.08	0.02	0.19	0.31	0.03	0.8	-0.02	0.22	-0.23	0.59
ENSMUSG00000046032	chrX:101213864-101213774:-@chrX:101212346-101211959:-	0.64	0.59	0.7	0.5	0.43	0.57	0.64	0.59	0.7	0.54	0.47	0.62	0.14	9.62	0.1	1.07
ENSMUSG00000024299	chr17:33549480-33549609:+@chr17:33550466-33550670:+	0.47	0.26	0.69	0.27	0.13	0.49	0.47	0.26	0.69	0.43	0.22	0.73	0.2	1.06	0.04	0.51
ENSMUSG00000030110	chr6:118155435-118155288:-@chr6:118154010-118151748:-	0.74	0.44	0.98	0.73	0.42	0.99	0.74	0.44	0.98	0.51	0.19	0.81	0.01	0.45	0.23	0.95
ENSMUSG00000027615	chr3:20029318-20029147:-@chr3:20029045-20028960:-	0.07	0.02	0.16	0.17	0.05	0.36	0.07	0.02	0.16	0.21	0.06	0.44	-0.1	0.35	-0.14	0.55
ENSMUSG00000025137	chr11:120612601-120612463:-@chr11:120612083-120612001:-	0.28	0.23	0.35	0.13	0.09	0.19	0.28	0.23	0.35	0.19	0.13	0.25	0.15	24.94	0.09	1.02
ENSMUSG00000000738,ENSMUSG00000092329	chr8:123079414-123079539:+@chr8:123080637-123080810:+	0.26	0.2	0.33	0.13	0.1	0.18	0.26	0.2	0.33	0.15	0.11	0.2	0.13	20.96	0.11	3.01
ENSMUSG00000000901	chr10:75924115-75923959:-@chr10:75923490-75923224:-	0.92	0.83	0.97	0.74	0.64	0.83	0.92	0.83	0.97	0.86	0.75	0.95	0.18	4.39	0.06	0.19
ENSMUSG00000073684	chr4:155249966-155250062:+@chr4:155250506-155250650:+	0.59	0.45	0.72	0.56	0.37	0.75	0.59	0.45	0.72	0.38	0.22	0.53	0.03	0.35	0.21	2.1
ENSMUSG00000032480	chr9:110086031-110085950:-@chr9:110085878-110085685:-	0.07	0.03	0.12	0.2	0.11	0.3	0.07	0.03	0.12	0.18	0.09	0.31	-0.13	1.63	-0.11	0.77
ENSMUSG00000020782	chr11:115854547-115854575:+@chr11:115855063-115855105:+	0.38	0.06	0.86	0.56	0.12	0.96	0.38	0.06	0.86	0.44	0.06	0.9	-0.18	0.98	-0.06	1.08
ENSMUSG00000038679	chr15:50831958-50831607:-@chr15:50831006-50830829:-	0.93	0.82	0.99	0.71	0.46	0.92	0.93	0.82	0.99	0.91	0.71	1	0.22	1.07	0.02	0.21
ENSMUSG00000028959	chr5:24444395-24444375:-@chr5:24444126-24443895:-	0.93	0.8	1	0.75	0.57	0.94	0.93	0.8	1	0.87	0.63	0.98	0.18	0.98	0.06	0.23
ENSMUSG00000030035	chr6:83120044-83119868:-@chr6:83119720-83119045:-	0.29	0.2	0.39	0.44	0.31	0.58	0.29	0.2	0.39	0.38	0.25	0.53	-0.15	0.83	-0.09	0.36
ENSMUSG00000032594	chr9:108044725-108044900:+@chr9:108045246-108045313:+	0.35	0.24	0.49	0.41	0.22	0.63	0.35	0.24	0.49	0.53	0.32	0.82	-0.06	0.37	-0.18	0.78
ENSMUSG00000020776	chr11:116148228-116148121:-@chr11:116148043-116147904:-	0.21	0.09	0.42	0.37	0.15	0.67	0.21	0.09	0.42	0.29	0.1	0.57	-0.16	0.53	-0.08	0.43
ENSMUSG00000026848	chr2:30953752-30954017:+@chr2:30955768-30955953:+	0.37	0.32	0.44	0.27	0.22	0.33	0.37	0.32	0.44	0.24	0.19	0.29	0.1	1.85	0.13	16.7
ENSMUSG00000034327	chr14:67729224-67729237:+@chr14:67729351-67729409:+	0.58	0.13	0.99	0.52	0.13	0.95	0.58	0.13	0.99	0.41	0.07	0.87	0.06	1.09	0.17	1.14
ENSMUSG00000024947	chr19:6335039-6335082:+@chr19:6335445-6335905:+	0.73	0.59	0.91	0.53	0.35	0.72	0.73	0.59	0.91	0.7	0.48	0.93	0.2	1.04	0.03	0.38
ENSMUSG00000033540	chr5:108680111-108680206:+@chr5:108680395-108680497:+	0.47	0.26	0.72	0.63	0.28	0.97	0.47	0.26	0.72	0.54	0.21	0.88	-0.16	0.76	-0.07	0.63
ENSMUSG00000025372	chr11:120000552-120000586:+@chr11:120003038-120003085:+	0.42	0.14	0.83	0.39	0.13	0.74	0.42	0.14	0.83	0.22	0.07	0.51	0.03	0.58	0.2	0.74
NA	chr2:6547213-6547042:-@chr2:6546779-6539699:-	0.26	0.08	0.5	0.3	0.09	0.6	0.26	0.08	0.5	0.45	0.17	0.92	-0.04	0.47	-0.19	0.73
ENSMUSG00000037761	chr2:158635307-158635426:+@chr2:158636027-158636147:+	0.41	0.22	0.67	0.28	0.12	0.54	0.41	0.22	0.67	0.31	0.12	0.67	0.13	0.55	0.1	0.63
ENSMUSG00000047090	chr10:128802517-128802405:-@chr10:128801511-128801351:-	0.55	0.35	0.82	0.46	0.24	0.78	0.55	0.35	0.82	0.41	0.25	0.66	0.09	0.52	0.14	0.65
ENSMUSG00000019518	chr5:138177923-138177973:+@chr5:138178069-138178180:+	0.54	0.38	0.71	0.41	0.2	0.64	0.54	0.38	0.71	0.44	0.22	0.65	0.13	0.55	0.1	0.44
ENSMUSG00000021203	chr12:103402817-103402901:+@chr12:103403234-103403428:+	0.16	0.06	0.28	0.35	0.12	0.65	0.16	0.06	0.28	0.2	0.06	0.48	-0.19	0.65	-0.04	0.28
ENSMUSG00000032827	chr6:5134017-5134174:+@chr6:5134639-5134932:+	0.9	0.75	0.98	0.8	0.47	0.99	0.9	0.75	0.98	0.77	0.44	0.98	0.1	0.37	0.13	0.53
ENSMUSG00000023143	chr16:5204012-5203897:-@chr16:5203799-5203341:-	0.17	0.05	0.33	0.26	0.09	0.48	0.17	0.05	0.33	0.31	0.1	0.57	-0.09	0.35	-0.14	0.54
ENSMUSG00000066892	chr9:20644755-20644573:-@chr9:20642096-20642024:-	0.92	0.75	1	0.83	0.58	0.99	0.92	0.75	1	0.78	0.52	0.97	0.09	0.35	0.14	0.48
ENSMUSG00000034729	chr17:47372427-47372491:+@chr17:47372573-47372645:+	0.17	0.09	0.28	0.09	0.04	0.18	0.17	0.09	0.28	0.02	0	0.07	0.08	0.33	0.15	6.87
ENSMUSG00000025737,ENSMUSG00000097518	chr17:25827235-25827356:+@chr17:25827428-25827532:+	0.33	0.19	0.5	0.32	0.14	0.55	0.33	0.19	0.5	0.57	0.39	0.76	0.01	0.4	-0.24	1.51
[truncated: 2,089 more rows]

## Sheet: MXE
		ctrl-1 PSI			KO-1 PSI			ctrl-2 PSI			KO-2 PSI			diff-1	Bayes-1	diff-2	Bayes-2
[truncated: 1,095 more rows]

## Sheet: A5SS
		ctrl-1 PSI			KO-1 PSI			ctrl-2 PSI			KO-2 PSI			diff-1	Bayes-1	diff-2	Bayes-2
[truncated: 2,637 more rows]

[truncated: 1 more sheets: A3SS]
