# Supplementary material for: SRSF3 promotes pluripotency through Nanog mRNA export and coordination of the pluripotency gene expression program
Source: eLife. 2018 May 9;7:e37419. doi: 10.7554/eLife.37419 (PMC5963917; doi:10.7554/eLife.37419)
Supplement: Figure 7—source data 1. [file elife-37419-fig7-data1.xlsx]

## Sheet: Legend
Figure 7 – Source Data 1. Differentially expressed genes following SRSF3 depletion. The data is presented as log2(fold change) relative to control iPSC.

## Sheet: DEGs
Geneid	Ctrl	KO	AveExpr	P value	FDR
ENSMUSG00000023944	0	-0.0578454	11.2864	7.51073e-05	0.000625542
ENSMUSG00000037742	0	-0.0308331	11.137	0.00827203	0.017831
ENSMUSG00000034994	0	-0.0211078	11.061	0.0040272	0.0101076
ENSMUSG00000026193	0	0.396316	11.4377	0.000367463	0.00174666
ENSMUSG00000026234	0	-0.169237	10.7567	0.000176576	0.00106081
ENSMUSG00000032216	0	-0.170295	10.551	3.72842e-05	0.000418965
ENSMUSG00000021270	0	-0.162268	10.5864	7.12589e-05	0.000607791
ENSMUSG00000032294	0	-0.0657895	10.6841	0.00115956	0.00392227
ENSMUSG00000029580	0	-0.0106152	10.631	0.00654166	0.0148025
ENSMUSG00000057113	0	-0.162998	10.3436	0.000170917	0.00104066
ENSMUSG00000015656	0	-0.00798336	10.2441	7.75663e-07	7.64944e-05
ENSMUSG00000005610	0	-0.00318266	10.4972	0.728412	0.756792
ENSMUSG00000040152	0	0.600946	10.7579	0.00265111	0.0073068
ENSMUSG00000022283	0	-0.0520949	10.3199	0.000496668	0.00213783
ENSMUSG00000005566	0	-0.15336	10.0423	0.000261851	0.00138272
ENSMUSG00000032399	0	-0.156709	10.2094	0.000689165	0.00268974
ENSMUSG00000001525	0	-0.141366	10.1296	0.000169055	0.00103345
ENSMUSG00000025393	0	-0.0696896	10.1509	0.0100769	0.0209063
ENSMUSG00000026478	0	0.104912	11.2035	5.68214e-07	6.90468e-05
ENSMUSG00000031328	0	0.131951	10.3548	0.044907	0.0708503
ENSMUSG00000031502	0	0.397737	11.2988	6.89564e-07	7.37095e-05
ENSMUSG00000039630	0	-0.410665	9.81643	6.79874e-06	0.000184815
ENSMUSG00000024740	0	-0.15274	10.1071	0.00709419	0.0157737
ENSMUSG00000004980	0	-0.0780949	10.0553	0.00460023	0.011219
ENSMUSG00000001440	0	-0.103806	9.98789	0.00735537	0.0162346
ENSMUSG00000003153	0	0.024456	10.2649	0.000435097	0.00195829
ENSMUSG00000059796	0	-0.0448279	9.89835	2.62658e-05	0.000346828
ENSMUSG00000020719	0	0.0122639	10.0782	0.471302	0.517134
ENSMUSG00000020372	0	-0.0907782	9.93437	0.00351005	0.00908606
ENSMUSG00000000787	0	-0.134677	9.97574	0.0425878	0.0678843
ENSMUSG00000027070	0	0.0196957	10.2539	0.000113718	0.000810941
ENSMUSG00000028364	0	0.759435	10.3425	0.00469156	0.0113844
ENSMUSG00000039218	0	-0.485533	9.61076	1.05748e-05	0.000221281
ENSMUSG00000045983	0	-0.0884186	9.93824	0.302539	0.354391
ENSMUSG00000067274	0	-0.053313	9.91494	0.0805929	0.115676
ENSMUSG00000063524	0	-0.0904107	9.88611	0.0328933	0.0549416
ENSMUSG00000047126	0	-0.0266384	10.0636	0.000642392	0.00255728
ENSMUSG00000030695	0	-0.0890465	9.7544	0.00151998	0.00480516
ENSMUSG00000025261	0	-0.470982	9.54336	3.26115e-05	0.000388541
ENSMUSG00000025980	0	-0.198019	9.55412	5.11499e-05	0.000502253
ENSMUSG00000025428	0	-0.13934	9.70096	0.000979142	0.00347706
ENSMUSG00000020048	0	0.10234	10.0849	0.00132384	0.00433044
ENSMUSG00000020361	0	-0.058307	9.66783	0.00114281	0.00387878
ENSMUSG00000018593	0	0.381069	10.6183	6.66943e-06	0.000182891
ENSMUSG00000026219	0	-0.236634	9.70241	0.00248613	0.00695838
ENSMUSG00000054808	0	-0.0622663	9.76286	0.105504	0.145257
ENSMUSG00000054766	0	-0.253952	9.51802	0.000426571	0.0019322
ENSMUSG00000024991	0	-0.231347	9.70396	0.00998094	0.0207603
ENSMUSG00000022443	0	0.354034	10.1702	0.000361968	0.00172988
ENSMUSG00000026726	0	0.103877	9.95878	0.0454836	0.0715595
ENSMUSG00000058799	0	-0.183573	9.53739	0.000368172	0.00174852
ENSMUSG00000078812	0	-0.117073	9.72446	0.0747884	0.108674
ENSMUSG00000036371	0	-0.280041	9.39878	0.000205044	0.00117246
ENSMUSG00000027184	0	-0.235573	9.56672	0.000489146	0.00211979
ENSMUSG00000024359	0	-0.124796	9.59478	0.000687979	0.00268607
ENSMUSG00000037487	0	-0.538442	9.32583	9.17922e-05	0.000712079
ENSMUSG00000021546	0	-0.328667	9.60253	0.000249794	0.00134198
ENSMUSG00000057666	0	-0.0773992	9.65246	0.0188219	0.0347599
ENSMUSG00000030662	0	-0.278816	9.50823	0.000606592	0.0024566
ENSMUSG00000028693	0	-0.229765	9.32928	5.83083e-05	0.000542218
ENSMUSG00000025278	0	0.315353	10.3007	1.77328e-05	0.000279362
ENSMUSG00000042699	0	-0.298937	9.31858	1.21693e-05	0.000234887
ENSMUSG00000064080	0	0.638728	9.71338	0.000242289	0.00131481
ENSMUSG00000026864	0	0.197225	9.97942	0.000874301	0.00320046
ENSMUSG00000020914	0	-0.360028	9.4849	0.000523044	0.00222025
ENSMUSG00000006932	0	0.0600697	9.67019	0.651507	0.686347
ENSMUSG00000063229	0	-0.116486	9.68147	0.00175444	0.00533948
ENSMUSG00000040463	0	-0.184955	9.36771	0.000484324	0.00210568
ENSMUSG00000020850	0	-0.209168	9.45212	0.00219081	0.00630964
ENSMUSG00000032518	0	-0.0813197	9.50651	0.00498402	0.0119409
ENSMUSG00000020358	0	-0.232739	9.51463	0.00673773	0.0151487
ENSMUSG00000047146	0	-0.614494	8.63084	0.000303162	0.00152736
ENSMUSG00000028763	0	0.210519	10.2569	2.71838e-06	0.000117639
ENSMUSG00000060036	0	-0.113787	9.41584	0.000710111	0.00274834
ENSMUSG00000002900	0	0.353709	10.7083	1.27274e-06	8.59066e-05
ENSMUSG00000046434	0	-0.429069	9.27521	3.38691e-05	0.000397768
ENSMUSG00000032796	0	0.351842	11.0037	1.92383e-07	5.21238e-05
ENSMUSG00000038587	0	-0.0505931	9.62223	0.0203918	0.0370279
ENSMUSG00000011179	0	-0.112775	9.57188	0.0228017	0.0405976
ENSMUSG00000058655	0	-0.33863	9.23763	5.19512e-05	0.000506273
ENSMUSG00000026238	0	-0.196384	9.30596	9.81247e-05	0.0007418
ENSMUSG00000028639	0	-0.0965597	9.46937	0.0140316	0.0274356
ENSMUSG00000002265	0	-0.146635	9.49865	0.247821	0.298337
ENSMUSG00000030744	0	-0.123553	9.41332	0.00295932	0.00796597
ENSMUSG00000044533	0	-0.0402983	9.48146	0.056973	0.0864383
ENSMUSG00000020849	0	-0.139162	9.44409	0.059256	0.0892899
ENSMUSG00000020368	0	0.122902	9.72949	0.00116866	0.00394516
ENSMUSG00000006498	0	-0.576543	9.19454	1.75681e-06	9.91129e-05
ENSMUSG00000003970	0	-0.153996	9.32818	0.00374439	0.00955164
ENSMUSG00000074129	0	-0.177252	9.31025	0.00345415	0.00897752
ENSMUSG00000018707	0	0.0177869	9.38197	0.00428146	0.0106207
ENSMUSG00000029405	0	-0.127785	9.2921	0.0238519	0.0421291
ENSMUSG00000003814	0	0.27547	9.85881	0.000107501	0.000785622
ENSMUSG00000056201	0	0.0183053	9.48535	0.745748	0.772573
ENSMUSG00000025809	0	0.512303	9.9905	2.55076e-05	0.000338841
ENSMUSG00000018379	0	-0.476901	9.10206	2.91885e-05	0.000366875
ENSMUSG00000059005	0	-0.307624	9.22147	0.000192299	0.00112209
ENSMUSG00000043716	0	-0.117202	9.28662	0.00186277	0.00558245
ENSMUSG00000031503	0	0.474963	10.6189	1.74869e-06	9.89093e-05
ENSMUSG00000001416	0	-0.122657	9.26137	0.00171762	0.00526195
ENSMUSG00000071644	0	-0.156341	9.22855	0.000736097	0.00281926
ENSMUSG00000087166	0	-0.360927	8.81106	0.00102538	0.00358099
ENSMUSG00000031320	0	-0.106224	9.22262	0.000293488	0.00149475
ENSMUSG00000063870	0	-0.244106	9.12989	6.64397e-05	0.000584884
ENSMUSG00000025130	0	0.158522	9.88551	1.57508e-05	0.000264614
ENSMUSG00000022884	0	-0.451254	9.03417	9.89338e-06	0.00021699
ENSMUSG00000025203	0	-0.00869113	9.27623	0.0994326	0.138216
ENSMUSG00000027248	0	0.188392	9.76779	5.76266e-05	0.00053911
ENSMUSG00000020290	0	-0.262599	9.21585	0.0039025	0.0098589
ENSMUSG00000027288	0	-0.181265	8.9785	2.39174e-05	0.000327239
ENSMUSG00000068039	0	-0.187426	9.205	0.00519409	0.0123314
ENSMUSG00000001924	0	-0.0895761	9.20739	0.00211646	0.0061553
ENSMUSG00000022462	0	-0.228824	8.91647	1.10296e-05	0.000224333
ENSMUSG00000028820	0	-0.123044	9.12043	4.50344e-05	0.000467692
ENSMUSG00000025153	0	-0.269505	8.93141	1.31971e-06	8.64406e-05
ENSMUSG00000098178	0	0.0101668	9.68157	0.164585	0.211387
ENSMUSG00000062647	0	-0.0294976	9.26877	0.0586476	0.0884955
ENSMUSG00000040225	0	-0.394878	9.0911	0.000377077	0.00177773
ENSMUSG00000029304	0	0.195906	9.10402	0.000321709	0.00159878
ENSMUSG00000040669	0	-1.09213	8.09934	9.88866e-05	0.000745249
ENSMUSG00000029922	0	-0.149693	8.85754	0.00210798	0.00613877
ENSMUSG00000041459	0	-0.31402	9.05067	5.35408e-05	0.000514219
ENSMUSG00000036202	0	-0.527548	8.67034	0.00058166	0.00238422
ENSMUSG00000025613	0	-0.130885	9.19076	0.0163825	0.0310797
ENSMUSG00000028649	0	-0.245612	9.17287	0.022096	0.0395561
ENSMUSG00000026496	0	-0.587118	8.54011	8.04751e-05	0.000652181
ENSMUSG00000005370	0	-0.281693	8.73534	3.2707e-05	0.000388835
ENSMUSG00000034024	0	-0.160748	9.17602	0.0159609	0.0304377
ENSMUSG00000024406	0	-0.268738	8.74824	0.000512866	0.00218891
ENSMUSG00000024393	0	0.0132569	9.17242	0.00123182	0.00409723
ENSMUSG00000028691	0	-0.0913828	9.05935	0.000489514	0.00211979
ENSMUSG00000034088	0	0.0958231	9.56229	0.000250111	0.00134286
ENSMUSG00000030007	0	-0.100672	9.08726	0.000446529	0.0019942
ENSMUSG00000030795	0	-0.360553	9.05724	0.000152074	0.000969368
ENSMUSG00000038612	0	-0.124821	9.13112	0.0030948	0.00823853
ENSMUSG00000074656	0	-0.272902	9.00997	0.000469694	0.00205951
ENSMUSG00000026728	0	0.508928	9.57162	0.00176651	0.00537026
ENSMUSG00000020075	0	-0.272849	8.99511	0.00266835	0.00734091
ENSMUSG00000022234	0	-0.125632	9.0873	0.00316406	0.00838731
ENSMUSG00000018583	0	-0.0671025	9.03066	0.000110299	0.00079755
ENSMUSG00000037815	0	-0.0385955	9.37048	0.000106821	0.000782739
ENSMUSG00000051223	0	-0.155673	9.1044	0.0129841	0.0257047
ENSMUSG00000057738	0	-0.0235049	9.14559	0.00748799	0.0164694
ENSMUSG00000025967	0	-0.163691	9.01534	0.000771986	0.00291902
ENSMUSG00000024360	0	-0.124467	9.15479	0.0266583	0.0461645
ENSMUSG00000060373	0	-0.147458	9.06348	0.00203188	0.00596843
ENSMUSG00000031229	0	-0.477374	8.70763	0.00117532	0.00396156
ENSMUSG00000032494	0	-0.0755696	8.6413	0.00113755	0.00386584
ENSMUSG00000036427	0	-0.212874	8.94988	7.58343e-05	0.000629924
ENSMUSG00000007850	0	-0.261899	9.02708	0.00324111	0.00853998
ENSMUSG00000060126	0	-0.0576769	9.15759	0.354804	0.406162
ENSMUSG00000040945	0	-0.287844	8.5356	0.000167966	0.00103081
ENSMUSG00000012848	0	-0.0451964	9.08697	0.00811433	0.0175612
ENSMUSG00000022961	0	-0.0108046	9.19425	0.976423	0.979368
ENSMUSG00000030738	0	-0.193037	9.048	0.0038811	0.00981591
ENSMUSG00000092341	0	0.0360056	9.13476	0.283458	0.334846
ENSMUSG00000051391	0	0.00480095	9.0025	2.65777e-05	0.000349266
ENSMUSG00000017861	0	-0.37065	8.68803	0.000141211	0.000924786
ENSMUSG00000033732	0	-0.277449	8.86659	2.25474e-05	0.000316384
ENSMUSG00000030357	0	-0.318071	8.72391	1.71278e-05	0.00027417
ENSMUSG00000050708	0	0.0656701	9.17592	0.0920071	0.129443
ENSMUSG00000029430	0	-0.182388	8.98348	0.00148929	0.00472653
ENSMUSG00000020917	0	-0.28814	8.79595	1.42045e-05	0.000252467
ENSMUSG00000004897	0	-0.229532	9.02828	0.0221155	0.0395814
ENSMUSG00000056851	0	-0.084818	8.98021	0.000243839	0.00132
ENSMUSG00000029761	0	0.606276	9.52788	0.0029147	0.00787468
ENSMUSG00000021477	0	0.28418	9.53597	0.000187894	0.00110818
ENSMUSG00000066036	0	-0.0279671	9.08827	0.15969	0.206041
ENSMUSG00000022710	0	-0.0883419	8.98143	0.00103711	0.00360983
ENSMUSG00000070436	0	0.263241	9.81797	1.11578e-05	0.000224646
ENSMUSG00000030057	0	-0.115834	9.10011	0.0765628	0.110856
ENSMUSG00000007739	0	-0.177433	8.93884	0.00156234	0.00489351
ENSMUSG00000028452	0	0.0493413	9.2289	0.0174481	0.0326971
ENSMUSG00000025364	0	-0.28923	8.9213	0.00388146	0.00981591
ENSMUSG00000036550	0	-0.607747	8.85987	1.66657e-05	0.000270521
ENSMUSG00000020250	0	0.0657568	8.99155	6.82844e-05	0.000593728
ENSMUSG00000029447	0	-0.0926764	8.94351	0.00354078	0.00915479
ENSMUSG00000027423	0	0.0836743	9.06513	0.0180763	0.0336074
ENSMUSG00000015165	0	-0.725086	8.62336	1.35389e-06	8.68783e-05
ENSMUSG00000026131	0	-0.0324372	8.8972	0.00148113	0.00470677
ENSMUSG00000031386	0	-0.375031	8.66107	1.80786e-05	0.000281386
ENSMUSG00000029247	0	-0.340764	8.77667	0.000123634	0.000852805
ENSMUSG00000034120	0	-0.277013	8.90274	0.00369791	0.00946737
ENSMUSG00000021282	0	0.0495298	9.06919	0.178447	0.22633
ENSMUSG00000038518	0	-0.418622	8.49916	0.00469681	0.011393
ENSMUSG00000031010	0	-0.12559	8.73322	1.502e-05	0.000258173
ENSMUSG00000009079	0	-0.179912	8.85646	0.000600295	0.00243829
ENSMUSG00000031375	0	0.632243	9.30275	0.000334264	0.00164516
ENSMUSG00000056076	0	-0.14077	8.92451	0.0467972	0.0732898
ENSMUSG00000026615	0	-0.36608	8.74846	0.000157134	0.000990936
ENSMUSG00000024811	0	-0.19204	8.94023	0.02462	0.043228
ENSMUSG00000005198	0	0.149693	8.97649	0.000345435	0.00167987
ENSMUSG00000019997	0	0.121245	9.57331	8.13516e-07	7.64944e-05
ENSMUSG00000010608	0	-0.192029	8.76009	2.2149e-05	0.000312392
ENSMUSG00000027620	0	-0.164203	8.99354	0.0227876	0.040579
ENSMUSG00000015143	0	0.346533	9.46435	0.000310456	0.00155483
ENSMUSG00000029614	0	-0.123156	8.87193	0.00492805	0.0118366
ENSMUSG00000047675	0	-0.126038	8.88083	0.00978989	0.0204169
ENSMUSG00000009470	0	-0.219485	9.05628	0.00507346	0.0121011
ENSMUSG00000058006	0	-0.530222	8.2639	0.000116331	0.00082037
ENSMUSG00000025982	0	-0.232928	8.91242	0.00393645	0.00992525
ENSMUSG00000024590	0	-0.404443	8.63837	0.00168354	0.00518189
ENSMUSG00000025001	0	-0.495541	8.50154	0.000559657	0.00232398
ENSMUSG00000020458	0	0.243679	9.06571	0.00740164	0.016322
ENSMUSG00000021218	0	-0.103644	8.92648	0.223301	0.273653
ENSMUSG00000061904	0	-0.0630253	8.97959	0.257006	0.307908
ENSMUSG00000025764	0	-0.0869553	9.02596	0.00272874	0.00746695
ENSMUSG00000006333	0	-0.0977163	8.85669	0.0249014	0.0436456
ENSMUSG00000021255	0	-0.482751	7.87906	0.000217746	0.0012231
ENSMUSG00000008682	0	-0.125468	8.81683	0.00701189	0.0156274
ENSMUSG00000035783	0	0.61785	9.17803	0.0010743	0.00370062
ENSMUSG00000031960	0	-0.0544632	8.73377	1.14071e-05	0.000227789
ENSMUSG00000031447	0	0.197158	9.36613	9.60682e-06	0.000213833
ENSMUSG00000006005	0	-0.271224	8.71531	0.000373996	0.00176668
ENSMUSG00000038900	0	-0.207022	8.755	0.00351159	0.00908897
ENSMUSG00000028081	0	-0.108185	8.80429	0.00690223	0.0154284
ENSMUSG00000016559	0	-0.0516096	9.25571	2.7101e-06	0.000117639
ENSMUSG00000028333	0	-0.365922	8.59342	0.000717042	0.00276851
ENSMUSG00000025132	0	0.0571881	9.04453	0.0190696	0.0351504
ENSMUSG00000001506	0	0.822426	9.50679	0.00012494	0.000859762
ENSMUSG00000006998	0	0.0121998	8.92347	0.96779	0.971864
ENSMUSG00000031207	0	0.489201	9.01902	0.000981368	0.00348109
ENSMUSG00000020402	0	-0.306243	8.74323	0.0011979	0.00401728
ENSMUSG00000036752	0	0.00570068	8.77196	0.000718623	0.00277315
ENSMUSG00000031311	0	-0.11052	8.74677	0.00117972	0.00397395
ENSMUSG00000033161	0	0.0659794	9.08253	0.000893538	0.00325308
ENSMUSG00000024966	0	-0.191077	8.58078	1.41943e-05	0.000252467
ENSMUSG00000002870	0	-0.314826	8.53801	6.46569e-05	0.000575897
ENSMUSG00000009575	0	-0.279977	8.53349	3.07658e-06	0.000125499
ENSMUSG00000016319	0	-0.160543	8.61412	0.000578089	0.00237624
ENSMUSG00000016921	0	-0.00464639	8.82034	0.01772	0.0330936
ENSMUSG00000029328	0	-0.312755	8.67516	0.000672785	0.0026432
ENSMUSG00000024576	0	-0.0247801	8.8851	0.135022	0.178861
ENSMUSG00000042207	0	-0.541782	8.06961	2.85962e-05	0.000361905
ENSMUSG00000025794	0	-0.124747	8.75774	0.014826	0.0286343
ENSMUSG00000043535	0	-0.608968	8.29039	0.000316307	0.00157837
ENSMUSG00000037411	0	0.929792	9.60255	1.75679e-05	0.000278371
ENSMUSG00000031422	0	-0.0145656	9.01844	0.000300925	0.00152203
ENSMUSG00000068823	0	-0.147155	8.74356	0.0179305	0.0334043
ENSMUSG00000000730	0	-0.215298	8.68943	0.0195629	0.0358519
ENSMUSG00000024335	0	-0.25744	8.82352	0.00034331	0.00167466
ENSMUSG00000002985	0	-0.138768	8.4077	2.83849e-05	0.000360987
ENSMUSG00000013415	0	-0.170828	8.73092	0.0559146	0.0851024
ENSMUSG00000021957	0	-0.277361	8.43765	3.49752e-06	0.000132797
ENSMUSG00000024587	0	-0.0927652	8.61514	3.84724e-05	0.000427238
ENSMUSG00000059208	0	-0.0708815	8.68794	0.000587684	0.0023995
ENSMUSG00000032096	0	-0.128063	8.90331	0.000581166	0.00238353
ENSMUSG00000022962	0	-0.161508	8.5162	0.00111451	0.00380572
ENSMUSG00000026020	0	-0.335676	8.68465	0.00100259	0.00352835
ENSMUSG00000015932	0	0.0450624	9.02727	0.00129169	0.00425637
ENSMUSG00000035726	0	-0.18103	8.53398	8.83181e-05	0.000693711
ENSMUSG00000071172	0	-0.33077	8.65742	0.00119287	0.00400592
ENSMUSG00000062825	0	0.0561837	9.02351	0.000876819	0.00320604
ENSMUSG00000032366	0	0.466337	9.17706	0.000681941	0.00267009
ENSMUSG00000029467	0	-0.0121971	8.9824	0.000947728	0.00339961
ENSMUSG00000015176	0	-0.0963229	8.61952	0.000661709	0.00261185
ENSMUSG00000037236	0	-0.510838	8.52112	0.000281535	0.0014555
ENSMUSG00000029767	0	0.324417	9.38772	8.47443e-06	0.000204149
ENSMUSG00000037331	0	-0.441761	8.37933	0.000101659	0.00075756
ENSMUSG00000028426	0	-0.435334	8.64885	0.000112835	0.000807392
ENSMUSG00000031004	0	-0.155707	8.70669	0.0969768	0.135368
ENSMUSG00000057236	0	-0.136778	8.59515	0.00019268	0.00112342
ENSMUSG00000020152	0	-0.101655	8.85254	0.00567467	0.013214
ENSMUSG00000022403	0	-0.20516	8.50569	3.95678e-05	0.000433808
ENSMUSG00000053931	0	-0.100926	8.79828	0.0127467	0.0253226
ENSMUSG00000060461	0	-0.208858	8.54436	0.000640773	0.00255384
ENSMUSG00000027397	0	-0.311479	8.71277	0.00707827	0.0157529
ENSMUSG00000047215	0	-0.120673	8.69378	0.0511668	0.0790223
ENSMUSG00000092035	0	0.452756	9.21252	9.89885e-07	7.87102e-05
ENSMUSG00000032481	0	-0.313599	8.30662	3.20518e-05	0.000385641
ENSMUSG00000025290	0	-0.126566	8.6657	0.015726	0.030063
ENSMUSG00000029730	0	-0.367256	8.42673	5.02452e-05	0.0004985
ENSMUSG00000003660	0	-0.174215	8.52356	6.67793e-05	0.000586122
ENSMUSG00000032097	0	-0.231	8.53726	0.000119182	0.000833252
ENSMUSG00000041859	0	-0.325772	8.43587	4.45997e-05	0.000466088
ENSMUSG00000045962	0	0.0889964	8.88227	0.0519737	0.0800543
ENSMUSG00000052997	0	-0.183913	8.52384	0.00162439	0.00504012
ENSMUSG00000027422	0	0.144306	9.07838	0.000102155	0.000759446
ENSMUSG00000020315	0	0.113814	8.99584	0.000470178	0.00206082
ENSMUSG00000029064	0	0.0320862	8.84103	0.106021	0.145849
ENSMUSG00000026434	0	-0.42663	8.52183	0.000588695	0.00240229
ENSMUSG00000001228	0	-0.141393	8.33207	3.61886e-05	0.000413683
ENSMUSG00000027067	0	-0.205047	8.59066	0.00271588	0.00743824
ENSMUSG00000022314	0	-0.286673	8.45182	0.000134963	0.000897274
ENSMUSG00000071866	0	-0.138184	8.57254	0.00137509	0.00444957
ENSMUSG00000003226	0	-0.177144	8.67332	0.0587145	0.0885843
ENSMUSG00000037608	0	-0.409764	8.55183	0.00061483	0.0024808
ENSMUSG00000021794	0	-0.0429128	8.81498	0.0239164	0.042226
ENSMUSG00000040681	0	-0.168847	8.76863	0.00112837	0.00384282
ENSMUSG00000018293	0	-0.0870474	8.65315	0.0533614	0.08187
ENSMUSG00000058355	0	-0.115274	8.68365	0.0931705	0.130896
ENSMUSG00000058558	0	-0.115077	8.56457	0.000412156	0.00188874
ENSMUSG00000003429	0	-0.149082	8.58662	0.00401408	0.010079
ENSMUSG00000013629	0	-0.417948	8.27738	3.83264e-05	0.000426527
ENSMUSG00000066232	0	-0.21046	8.45087	0.000852491	0.00313643
ENSMUSG00000029777	0	-0.236876	8.4133	0.000117872	0.000828636
ENSMUSG00000050966	0	-0.527813	8.46933	7.50996e-05	0.000625542
ENSMUSG00000008668	0	-0.119707	8.56196	0.00257879	0.00715505
ENSMUSG00000055065	0	-0.0847813	8.49923	0.00015255	0.000970839
ENSMUSG00000028645	0	-0.170474	8.58721	0.00153466	0.00483487
ENSMUSG00000031799	0	0.370992	9.22279	0.000160847	0.00100591
ENSMUSG00000028809	0	-0.0633474	8.61278	0.0126147	0.0251324
ENSMUSG00000006728	0	-0.0482402	8.57385	0.00279383	0.0076024
ENSMUSG00000007892	0	-0.0783823	8.61278	0.0660437	0.0979123
ENSMUSG00000053907	0	-0.153069	8.45498	0.000782393	0.00294669
ENSMUSG00000023456	0	-0.0586996	8.81	0.00297117	0.00798889
ENSMUSG00000005410	0	-0.336238	8.46776	0.0016963	0.00521032
ENSMUSG00000040850	0	-0.444238	8.3871	6.47471e-05	0.000576447
ENSMUSG00000006699	0	0.0435299	8.89967	0.00047164	0.00206475
ENSMUSG00000049470	0	-0.0206669	8.74588	0.119976	0.161563
ENSMUSG00000059070	0	-0.0737316	8.55333	0.0109228	0.0223279
ENSMUSG00000002718	0	-0.20563	8.58858	0.014186	0.0276734
ENSMUSG00000029169	0	-0.150571	8.60695	0.082757	0.118338
ENSMUSG00000041718	0	-0.781856	7.79088	0.000291612	0.00148861
ENSMUSG00000007891	0	0.4805	9.07727	9.84372e-06	0.000216463
ENSMUSG00000021134	0	-0.0189558	8.72795	0.0350401	0.0578193
ENSMUSG00000000303	0	-0.283857	8.50275	0.162693	0.209325
ENSMUSG00000021595	0	-0.157153	8.62653	0.0630784	0.0941457
ENSMUSG00000036036	0	-0.190964	8.1365	0.000143793	0.000934742
ENSMUSG00000078578	0	-0.101547	8.62131	0.246532	0.297128
ENSMUSG00000000568	0	-0.52658	8.39307	5.06861e-05	0.000500012
ENSMUSG00000026355	0	-0.288035	8.34146	4.51522e-05	0.000468294
ENSMUSG00000037851	0	-0.23344	8.2897	1.4213e-06	8.88656e-05
ENSMUSG00000051695	0	-0.213355	8.42653	0.00115415	0.0039076
ENSMUSG00000061315	0	-0.175419	8.50656	0.00601536	0.0138379
ENSMUSG00000032803	0	-0.0719722	8.69652	0.0071008	0.0157839
ENSMUSG00000027478	0	-0.370921	8.46841	0.0247325	0.0433911
ENSMUSG00000030536	0	0.0130389	8.66695	0.238937	0.289468
ENSMUSG00000057841	0	-0.108374	8.53201	0.0142213	0.0277227
ENSMUSG00000040731	0	0.11159	8.76803	0.0627257	0.0937659
ENSMUSG00000021910	0	-0.113353	8.62671	0.0160938	0.0306432
ENSMUSG00000061983	0	-0.0502593	8.54499	0.00973622	0.0203252
ENSMUSG00000020460	0	-0.207587	8.48134	0.00600526	0.0138219
ENSMUSG00000024949	0	0.0261555	8.67413	0.734037	0.761951
ENSMUSG00000069833	0	0.353178	9.07626	0.00163008	0.0050528
ENSMUSG00000000740	0	-0.104487	8.52355	0.0226668	0.0404099
ENSMUSG00000002052	0	-0.0671346	8.53035	0.0155735	0.0298079
ENSMUSG00000004207	0	0.384068	9.01751	0.000902381	0.00327609
ENSMUSG00000024853	0	-0.11903	8.46701	0.00187991	0.00562384
ENSMUSG00000022995	0	-0.423229	8.15103	6.33588e-05	0.000569139
ENSMUSG00000005397	0	0.369993	9.10065	0.00203524	0.00597369
ENSMUSG00000033943	0	-0.474033	8.15473	6.66398e-05	0.000585694
ENSMUSG00000001175	0	0.134631	8.90146	0.000189303	0.0011126
ENSMUSG00000027940	0	0.00433435	8.74904	0.00133582	0.00435859
ENSMUSG00000043411	0	-0.222366	8.40723	0.0110978	0.0226248
ENSMUSG00000024661	0	0.0786947	8.73476	0.0163593	0.0310491
ENSMUSG00000040054	0	-0.264443	8.2487	3.95285e-06	0.000139021
ENSMUSG00000029661	0	0.78491	9.25243	0.00013648	0.000904482
ENSMUSG00000022272	0	-0.0709805	8.36219	0.000118007	0.000828728
ENSMUSG00000030275	0	-0.157143	7.94705	5.49593e-06	0.00016284
ENSMUSG00000056537	0	-0.0707306	8.71765	0.00771593	0.0169046
ENSMUSG00000037876	0	-0.381545	8.21663	0.00671672	0.0151123
ENSMUSG00000041453	0	-0.12122	8.46101	0.00400259	0.0100573
ENSMUSG00000021488	0	-0.211069	8.31241	8.61499e-05	0.000683512
ENSMUSG00000024608	0	-0.0767404	8.49152	0.031007	0.0523084
ENSMUSG00000039191	0	-0.358764	8.13033	0.00129045	0.00425355
ENSMUSG00000041408	0	-0.142296	8.49389	0.0449501	0.0708981
ENSMUSG00000010277	0	-0.367878	8.37612	0.000467822	0.0020546
ENSMUSG00000071650	0	0.220982	8.81729	0.00602813	0.0138571
ENSMUSG00000031095	0	-0.169936	8.54768	0.0200547	0.0365347
ENSMUSG00000022797	0	-0.299414	7.97588	0.000361471	0.00172852
ENSMUSG00000021048	0	-0.118723	8.30693	0.00195623	0.00579684
ENSMUSG00000020571	0	0.090851	8.8472	0.000819694	0.00305209
ENSMUSG00000005506	0	-0.189273	8.33861	0.000189825	0.00111387
ENSMUSG00000035569	0	-0.201183	8.31907	0.000129821	0.00087696
ENSMUSG00000022673	0	-0.289027	8.39328	0.00166995	0.0051509
ENSMUSG00000048578	0	0.284282	8.93392	3.87621e-05	0.000428232
ENSMUSG00000005846	0	-0.15005	8.42418	0.0366716	0.060019
ENSMUSG00000034101	0	0.106288	8.85878	6.49383e-05	0.000577352
ENSMUSG00000007880	0	-0.150174	8.30307	9.43443e-05	0.000724253
ENSMUSG00000097479	0	-0.126248	8.37966	0.028326	0.0485014
ENSMUSG00000028234	0	-0.0584159	8.45678	0.0154535	0.029622
ENSMUSG00000032244	0	-0.383506	8.48751	0.000746564	0.00284558
ENSMUSG00000019432	0	-0.132629	8.31459	0.000507544	0.00217168
ENSMUSG00000028034	0	-0.716253	7.94585	1.44719e-07	4.52459e-05
ENSMUSG00000062203	0	-0.171482	8.42236	0.0281835	0.0483064
ENSMUSG00000017421	0	-0.255033	8.20269	1.05954e-05	0.000221281
ENSMUSG00000037242	0	0.222315	8.89628	0.00101819	0.00356755
ENSMUSG00000033047	0	-0.0809184	8.44065	0.13199	0.175395
ENSMUSG00000026083	0	-0.0908699	8.46019	0.188079	0.236628
ENSMUSG00000037805	0	-0.231616	8.26195	0.000309467	0.0015521
ENSMUSG00000029657	0	-0.192758	8.29233	0.000491995	0.0021242
ENSMUSG00000021953	0	-0.523204	7.72064	0.000738082	0.00282378
ENSMUSG00000022752	0	-0.213364	8.34354	0.00787754	0.0171866
ENSMUSG00000031353	0	0.0621739	8.79398	0.000104118	0.000767803
ENSMUSG00000039262	0	-0.0769707	8.32798	0.000291845	0.0014888
ENSMUSG00000042406	0	-0.137276	8.50153	0.0307486	0.0519523
ENSMUSG00000032187	0	-0.116003	8.29514	0.000100254	0.000751976
ENSMUSG00000052429	0	-0.167995	8.30588	0.00112371	0.00383291
ENSMUSG00000026229	0	-0.13652	8.41816	0.0710495	0.104124
ENSMUSG00000070047	0	0.253429	8.76474	0.00171999	0.00526628
ENSMUSG00000027405	0	-0.144859	8.36163	0.0534309	0.0819365
ENSMUSG00000055436	0	-0.289752	8.34018	0.00155246	0.00487206
ENSMUSG00000001435	0	-0.267481	7.89786	0.00050635	0.00216784
ENSMUSG00000030189	0	-0.268899	8.12077	0.00320248	0.00846492
ENSMUSG00000020706	0	-0.130789	8.27183	0.00383384	0.009719
ENSMUSG00000031996	0	-0.158151	8.34282	0.00475399	0.0114978
ENSMUSG00000020149	0	-0.0167388	8.56587	0.0153272	0.0294256
ENSMUSG00000021806	0	-0.339157	8.85615	1.55833e-05	0.000263952
ENSMUSG00000042354	0	-0.211802	8.17712	0.000367202	0.00174619
ENSMUSG00000063358	0	-0.03598	8.46133	0.71561	0.744832
ENSMUSG00000039361	0	0.316277	8.60246	0.0176638	0.0330168
ENSMUSG00000014956	0	-0.189836	8.36357	0.0676917	0.0999773
ENSMUSG00000000628	0	-0.272876	8.36821	0.00264251	0.00728917
ENSMUSG00000041431	0	-0.129818	8.38092	0.0216365	0.0388636
ENSMUSG00000020349	0	-0.0492385	8.60545	0.000218171	0.00122392
ENSMUSG00000059552	0	-0.175801	7.98909	8.1672e-05	0.000659931
ENSMUSG00000035247	0	0.0823484	8.48183	0.00536913	0.0126667
ENSMUSG00000032423	0	-0.482854	8.23041	0.000269764	0.0014116
ENSMUSG00000063457	0	-0.0771147	8.37341	0.0420263	0.0671889
ENSMUSG00000041740	0	-0.106228	8.44893	0.097351	0.135804
ENSMUSG00000071072	0	-0.172738	8.24537	0.000241606	0.00131212
ENSMUSG00000035530	0	-0.00823683	8.4908	0.60643	0.644709
ENSMUSG00000020277	0	-0.292826	8.4911	0.000822372	0.00305843
ENSMUSG00000023175	0	0.265697	8.85777	6.59587e-05	0.000583211
ENSMUSG00000048076	0	0.0944919	8.70267	0.000714975	0.00276345
ENSMUSG00000019970	0	-0.340867	8.45019	0.000471213	0.00206412
ENSMUSG00000036438	0	-0.0425024	8.32038	0.000457732	0.00202651
ENSMUSG00000005683	0	-0.101939	8.42091	0.289064	0.340534
ENSMUSG00000022698	0	-0.257648	8.26427	0.012565	0.0250523
ENSMUSG00000028484	0	-0.404307	7.7859	1.29379e-06	8.64406e-05
ENSMUSG00000006740	0	-0.0611268	8.57382	0.000550812	0.00230153
ENSMUSG00000031715	0	-0.170048	8.2787	0.00430225	0.0106614
ENSMUSG00000014226	0	-0.250423	8.0839	0.000291671	0.00148861
ENSMUSG00000020869	0	0.0831093	8.72558	8.96208e-05	0.000700933
ENSMUSG00000015647	0	-0.268105	8.1097	0.00245476	0.00688435
ENSMUSG00000027642	0	0.118128	8.73038	0.000441239	0.00197581
ENSMUSG00000007815	0	0.00342098	8.56376	0.00392284	0.00989782
ENSMUSG00000071659	0	-0.152019	8.27524	0.00128527	0.00424351
ENSMUSG00000013089	0	-0.269095	7.66453	0.000222875	0.00124142
ENSMUSG00000027828	0	0.00129806	8.66797	0.00062071	0.00249489
ENSMUSG00000022816	0	0.525449	8.69116	0.00570737	0.0132755
ENSMUSG00000062867	0	-0.107115	8.26395	0.00104589	0.00363561
ENSMUSG00000056342	0	-0.274896	8.31581	0.00530509	0.0125445
ENSMUSG00000022150	0	0.223905	8.89174	0.000238455	0.00130102
ENSMUSG00000020326	0	0.493334	9.06962	5.15681e-06	0.000157183
ENSMUSG00000027680	0	-0.268919	8.16163	5.4087e-05	0.000517434
ENSMUSG00000022533	0	-0.111459	9.0798	2.51111e-06	0.000115336
ENSMUSG00000020649	0	-0.147142	8.41351	0.0156136	0.029874
ENSMUSG00000016554	0	-0.0258561	8.36123	0.0577849	0.0874525
ENSMUSG00000041936	0	0.0636849	8.38042	0.00541151	0.012741
ENSMUSG00000038252	0	-0.309943	8.07435	5.6867e-05	0.000534357
ENSMUSG00000042520	0	-0.425433	8.27512	0.000102402	0.000759997
ENSMUSG00000027523	0	0.269747	8.81542	0.000152079	0.000969368
ENSMUSG00000010095	0	-0.109353	8.41846	0.0377447	0.0615004
ENSMUSG00000004099	0	-0.273263	8.18148	0.000377398	0.00177886
ENSMUSG00000021823	0	0.408397	8.73086	0.00123181	0.00409723
ENSMUSG00000017548	0	-0.490059	8.09712	0.000835596	0.00309241
ENSMUSG00000032637	0	-0.145695	8.34493	0.115769	0.156783
ENSMUSG00000062328	0	-0.100913	8.29058	0.00523784	0.0124163
ENSMUSG00000023150	0	-0.123883	8.21277	0.00063785	0.00254653
ENSMUSG00000038366	0	0.267163	8.53855	0.0117807	0.0237687
ENSMUSG00000030435	0	-0.181226	8.28698	0.0373878	0.0610167
ENSMUSG00000026491	0	-0.27571	8.27019	0.0158504	0.0302709
ENSMUSG00000007836	0	-0.266275	8.15808	0.00542084	0.0127591
ENSMUSG00000007564	0	-0.0137582	8.44328	0.235711	0.286319
ENSMUSG00000071415	0	-0.121744	8.29354	0.0348517	0.0575685
ENSMUSG00000029103	0	0.270449	9.18333	1.05138e-06	8.0396e-05
ENSMUSG00000054717	0	-0.0932926	8.18194	0.00030297	0.00152674
ENSMUSG00000031575	0	0.0137444	8.14278	2.93105e-05	0.000367571
ENSMUSG00000061477	0	-0.149025	8.21127	0.0014113	0.00453674
ENSMUSG00000045128	0	-0.043883	8.28624	0.0133548	0.0262998
ENSMUSG00000062070	0	-0.0880087	8.41773	0.059285	0.0893101
ENSMUSG00000028465	0	0.429551	8.7265	0.000351734	0.00169726
ENSMUSG00000046711	0	-0.204404	7.83293	0.00151272	0.00478566
ENSMUSG00000023004	0	-0.0749919	8.20394	0.00067841	0.00266054
ENSMUSG00000021377	0	-0.464278	8.15732	0.00021888	0.00122602
ENSMUSG00000007029	0	-0.628469	7.87191	1.70051e-06	9.65828e-05
ENSMUSG00000074637	0	-0.633709	7.49202	0.00115353	0.00390608
ENSMUSG00000019961	0	-0.384453	8.1473	0.00095277	0.00341212
ENSMUSG00000029110	0	-0.00878145	8.52652	0.00117465	0.0039611
ENSMUSG00000024974	0	-0.26787	8.08785	9.20086e-05	0.000713393
ENSMUSG00000063273	0	-0.238711	8.22686	0.0154449	0.029608
ENSMUSG00000020114	0	-0.147661	8.29268	0.0402723	0.0648672
ENSMUSG00000020929	0	-0.160544	8.13906	0.000421373	0.00191697
ENSMUSG00000036309	0	-0.236778	8.21691	0.0125682	0.0250566
ENSMUSG00000040952	0	-0.0906296	8.31903	0.437733	0.485323
ENSMUSG00000018666	0	-0.467135	7.77231	6.75984e-05	0.000590336
ENSMUSG00000017404	0	-0.123539	8.28544	0.145749	0.190962
ENSMUSG00000055320	0	0.102768	8.6168	0.00250896	0.00701013
ENSMUSG00000021374	0	-0.296731	8.19272	0.00596427	0.013752
ENSMUSG00000019818	0	0.114657	8.49062	0.0305428	0.0516763
ENSMUSG00000090625	0	0.291081	8.75856	0.000172589	0.00104544
ENSMUSG00000024073	0	-0.494158	8.03994	8.65648e-05	0.000685831
ENSMUSG00000037894	0	-0.200917	8.04295	0.00012983	0.00087696
ENSMUSG00000031299	0	-0.0494866	8.26081	0.00462659	0.0112688
ENSMUSG00000020422	0	0.015191	8.10327	0.000968037	0.00344959
ENSMUSG00000032479	0	0.216784	8.58731	0.00230968	0.00657265
ENSMUSG00000008683	0	-0.175634	8.1624	0.0029261	0.0078977
ENSMUSG00000074221	0	-0.350185	8.21755	0.00294197	0.0079298
ENSMUSG00000031948	0	-0.0692905	8.11968	0.000132918	0.000889879
ENSMUSG00000005204	0	-0.0916913	8.10184	0.00157976	0.00493724
ENSMUSG00000024151	0	-0.75433	7.76041	1.00764e-05	0.000217714
ENSMUSG00000043962	0	-0.103649	8.28048	0.208332	0.258104
ENSMUSG00000022285	0	-0.0751439	8.38276	0.00681065	0.0152579
ENSMUSG00000044783	0	-0.252937	8.19791	0.014324	0.0278857
ENSMUSG00000022010	0	-0.0565859	8.60337	4.92482e-06	0.000153828
ENSMUSG00000031403	0	-0.186632	7.75059	0.000160162	0.00100357
ENSMUSG00000032115	0	0.117022	8.59094	0.00295311	0.00795493
ENSMUSG00000025608	0	-0.0652594	8.91544	9.147e-07	7.82662e-05
ENSMUSG00000032407	0	-0.0908922	8.0821	0.00137669	0.00445222
ENSMUSG00000022477	0	-0.0589583	8.1952	0.00239422	0.00675414
ENSMUSG00000018501	0	-0.629455	7.86275	9.99119e-05	0.000750643
ENSMUSG00000031714	0	-0.109491	8.43035	0.000851007	0.00313202
ENSMUSG00000040385	0	-0.0185237	8.36718	0.164243	0.211011
ENSMUSG00000003032	0	-0.516168	8.16747	0.000729613	0.00280176
ENSMUSG00000022336	0	-0.138166	8.15658	0.00674875	0.015161
ENSMUSG00000030654	0	0.0464482	8.42563	0.00394244	0.00993349
ENSMUSG00000024392	0	-0.110349	8.21019	0.0533096	0.0818078
ENSMUSG00000028936	0	-0.218396	8.14825	0.00795162	0.0173162
ENSMUSG00000022391	0	-0.360972	8.19807	0.000301714	0.00152357
ENSMUSG00000032085	0	0.613972	8.66921	0.000640911	0.00255384
ENSMUSG00000032966	0	-0.0169316	8.57012	1.66025e-05	0.000269695
ENSMUSG00000024640	0	-0.56101	7.54073	1.19508e-06	8.41828e-05
ENSMUSG00000022185	0	0.0678362	8.21263	0.000505637	0.00216648
ENSMUSG00000034349	0	-0.229468	8.32563	0.000840881	0.00310725
ENSMUSG00000001280	0	-0.434508	8.02819	0.000116189	0.000820065
ENSMUSG00000057561	0	-0.218481	8.1967	0.0244288	0.0429819
ENSMUSG00000093930	0	-0.310176	8.0353	0.00272939	0.0074678
ENSMUSG00000027678	0	-0.177404	8.02911	1.9749e-05	0.000294015
ENSMUSG00000024493	0	-0.360837	7.86947	0.000156209	0.000986241
ENSMUSG00000027018	0	-0.286442	8.0467	0.00068713	0.00268408
ENSMUSG00000050953	0	-0.304456	8.31362	5.96077e-05	0.000548261
ENSMUSG00000021111	0	-0.133142	8.17069	0.00852005	0.0182599
ENSMUSG00000034269	0	-0.557639	8.05375	1.53024e-05	0.000261343
ENSMUSG00000041057	0	-0.393188	8.04403	0.00854191	0.0182924
ENSMUSG00000028790	0	-0.176774	8.15809	0.0126113	0.0251287
ENSMUSG00000015837	0	0.462604	8.64026	0.00064068	0.00255384
ENSMUSG00000063511	0	-0.0410724	8.21081	0.0134109	0.026396
ENSMUSG00000031696	0	-0.0271412	8.40217	0.00791212	0.0172501
ENSMUSG00000027699	0	-0.489474	7.87465	1.19141e-05	0.000232003
ENSMUSG00000032531	0	0.132842	8.58643	1.6178e-05	0.000266374
ENSMUSG00000026276	0	-0.115895	8.44953	0.000475997	0.00207972
ENSMUSG00000032178	0	-0.59421	7.78124	5.10316e-06	0.000156471
ENSMUSG00000011257	0	0.324009	8.38476	5.01776e-05	0.00049828
ENSMUSG00000027547	0	-0.485385	7.92569	0.000724838	0.00279026
ENSMUSG00000024529	0	0.736146	8.86995	0.000517056	0.00220165
ENSMUSG00000026553	0	0.0375545	8.59262	0.000219714	0.0012293
ENSMUSG00000020745	0	-0.0849423	8.44856	0.000232542	0.00127808
ENSMUSG00000040481	0	-0.578999	7.88591	2.29935e-05	0.000320391
ENSMUSG00000026473	0	-0.129547	8.33857	0.00223255	0.00639629
ENSMUSG00000030655	0	-0.434967	8.02884	0.00038115	0.0017927
ENSMUSG00000061136	0	-0.166676	8.20362	0.10547	0.145237
ENSMUSG00000033295	0	-0.476365	7.87842	6.13354e-05	0.000559928
ENSMUSG00000009927	0	-0.144264	8.16205	0.0303489	0.0514275
ENSMUSG00000079259	0	-0.0985082	7.842	7.69322e-06	0.00019628
ENSMUSG00000018362	0	-0.131341	8.16474	0.0852421	0.121326
ENSMUSG00000038759	0	-0.258692	8.08134	0.00170849	0.00524325
ENSMUSG00000038762	0	-0.132287	8.11927	0.00372994	0.00952858
ENSMUSG00000020359	0	-0.180955	8.18979	0.0445406	0.0703785
ENSMUSG00000041688	0	-0.246711	7.83394	8.4109e-05	0.00067367
ENSMUSG00000029472	0	-0.129283	8.02119	6.32389e-05	0.000568451
ENSMUSG00000040249	0	0.54279	8.4377	0.00433736	0.0107266
ENSMUSG00000040010	0	-0.171715	7.92062	2.18107e-05	0.00031062
ENSMUSG00000024735	0	-0.0561512	8.13183	0.00234118	0.00663819
ENSMUSG00000032116	0	0.0910923	8.55154	0.000433637	0.00195293
ENSMUSG00000024613	0	-0.279613	7.81981	0.000416681	0.00190223
ENSMUSG00000021660	0	-0.150565	8.14567	0.0262395	0.0455729
ENSMUSG00000030082	0	0.0810684	8.55861	0.00039842	0.00184937
ENSMUSG00000029249	0	-0.429469	7.78367	0.000436911	0.00196283
ENSMUSG00000068566	0	0.0426612	8.61714	0.000133517	0.000893071
ENSMUSG00000050244	0	-0.219083	7.82641	0.000148264	0.000951827
ENSMUSG00000028211	0	0.429374	8.53435	0.00847788	0.0181801
ENSMUSG00000005103	0	-0.0132708	8.42261	0.00143205	0.00458865
ENSMUSG00000055762	0	-0.161262	8.09668	0.057631	0.0872617
ENSMUSG00000022463	0	-0.0393651	8.21945	0.931563	0.93918
ENSMUSG00000021767	0	-0.490685	7.66128	0.00377045	0.009596
ENSMUSG00000031701	0	-0.0636894	8.22229	0.4777	0.523082
ENSMUSG00000004356	0	-0.01031	8.14537	0.00952791	0.0199751
ENSMUSG00000020661	0	0.0547	7.3086	3.46063e-07	6.05868e-05
ENSMUSG00000068882	0	-0.203125	8.10237	0.0306837	0.0518707
ENSMUSG00000029267	0	-0.276843	7.75828	0.000486428	0.00211222
ENSMUSG00000021771	0	-0.0962582	8.22852	0.0803695	0.115428
ENSMUSG00000018326	0	0.101007	8.46848	0.000293899	0.00149615
ENSMUSG00000027715	0	-0.245722	8.29857	0.000119034	0.000833071
ENSMUSG00000018446	0	-0.204055	7.92976	0.00074827	0.00284898
ENSMUSG00000027804	0	-0.148319	7.97339	0.000441351	0.00197587
ENSMUSG00000020923	0	-0.29621	7.81698	0.000655138	0.00259197
ENSMUSG00000004264	0	-0.13143	8.08215	0.0171689	0.0322865
ENSMUSG00000037364	0	0.370983	8.10258	2.69254e-06	0.000117639
ENSMUSG00000024097	0	-0.0643826	8.14926	0.0238977	0.0421964
ENSMUSG00000052397	0	-0.178845	8.03501	0.00332056	0.00870127
ENSMUSG00000055204	0	0.024756	8.42865	0.00152183	0.00480895
ENSMUSG00000022682	0	-0.170335	8.01719	0.00286245	0.00775643
ENSMUSG00000041028	0	0.00550564	8.24765	0.360184	0.411312
ENSMUSG00000093674	0	-0.0593649	8.16245	0.516834	0.559933
ENSMUSG00000021116	0	-0.115614	8.10811	0.107295	0.14739
ENSMUSG00000016541	0	0.0609154	8.47295	7.9289e-05	0.000646645
ENSMUSG00000028851	0	-0.223763	8.03493	0.00415259	0.0103689
ENSMUSG00000000561	0	-0.177295	7.96518	0.00240844	0.00678855
ENSMUSG00000024048	0	0.146765	8.49491	5.95981e-05	0.000548261
ENSMUSG00000001910	0	-0.205441	7.85273	1.43966e-05	0.000254001
ENSMUSG00000038909	0	-0.402869	8.03519	0.000320639	0.00159455
ENSMUSG00000059291	0	-0.140605	8.07866	0.0360155	0.0591613
ENSMUSG00000012396	0	-0.48185	7.47353	0.00595338	0.0137341
ENSMUSG00000049775	0	0.244298	8.47507	0.000365916	0.0017421
ENSMUSG00000030432	0	-0.0998334	8.02341	0.00153285	0.00483309
ENSMUSG00000030062	0	0.106393	8.51992	0.000104505	0.000770134
ENSMUSG00000031297	0	-0.336727	7.1677	0.000111146	0.0008
ENSMUSG00000040549	0	-0.165774	8.02848	0.012404	0.0247611
ENSMUSG00000060938	0	-0.142159	8.07108	0.0398506	0.0643155
ENSMUSG00000027342	0	-0.143358	7.92106	4.41697e-05	0.000464143
ENSMUSG00000035152	0	-0.109781	8.1829	0.0778229	0.112325
ENSMUSG00000036782	0	-0.112228	7.97954	0.183247	0.231442
ENSMUSG00000036698	0	-0.271366	7.96041	0.000952181	0.00341057
ENSMUSG00000005732	0	-0.232512	7.99275	0.00366941	0.00940647
ENSMUSG00000036112	0	-0.0546523	8.16389	0.408871	0.457554
ENSMUSG00000061787	0	-0.13455	8.0388	0.00748878	0.0164695
ENSMUSG00000032050	0	-0.147761	8.09079	0.12449	0.166802
ENSMUSG00000021939	0	0.608746	8.64996	0.000101336	0.000757206
ENSMUSG00000025508	0	-0.133248	8.083	0.107562	0.147711
ENSMUSG00000023932	0	-0.442663	7.67404	0.000505783	0.00216668
ENSMUSG00000002297	0	-0.38652	7.82847	0.000641913	0.00255651
ENSMUSG00000015749	0	-0.423626	7.66744	5.88713e-05	0.00054459
ENSMUSG00000027479	0	0.0615299	8.32953	0.00198835	0.00586909
ENSMUSG00000026074	0	-0.084905	8.00785	0.00273893	0.00748643
ENSMUSG00000003779	0	-0.0490383	8.06241	0.0269757	0.0465855
ENSMUSG00000000275	0	-0.17591	7.74515	2.04704e-06	0.000105954
ENSMUSG00000007670	0	-0.0815895	7.94994	0.000310044	0.00155383
ENSMUSG00000001794	0	0.101267	8.29466	0.00586168	0.0135725
ENSMUSG00000000555	0	0.589802	8.46722	0.000495559	0.0021346
ENSMUSG00000052833	0	-0.144137	7.97902	0.00244613	0.00686919
ENSMUSG00000032562	0	0.189623	8.4749	2.99678e-05	0.000372198
ENSMUSG00000022858	0	-0.30213	7.99657	0.002183	0.00629625
ENSMUSG00000035325	0	0.124817	8.3203	0.00422887	0.010514
ENSMUSG00000002129	0	-0.632131	7.76979	1.17347e-05	0.000230547
ENSMUSG00000028495	0	-0.147467	7.96659	0.00229657	0.00654523
ENSMUSG00000024827	0	-0.729042	7.37891	0.000352583	0.00169987
ENSMUSG00000012535	0	-0.0780196	8.02711	0.0116992	0.0236418
ENSMUSG00000027193	0	-0.0913021	8.08077	0.231412	0.282036
ENSMUSG00000032293	0	-0.22051	7.90974	0.00033716	0.0016548
ENSMUSG00000028656	0	0.168564	8.30934	0.0210395	0.0379684
ENSMUSG00000036940	0	-0.226048	7.85369	7.96722e-05	0.000648067
ENSMUSG00000029147	0	-0.270885	8.04117	0.00240841	0.00678855
ENSMUSG00000066000	0	-0.22557	7.60713	0.00839066	0.0180372
ENSMUSG00000068739	0	-0.220107	7.91564	0.000686763	0.00268381
ENSMUSG00000021178	0	-0.0285323	8.13043	0.637059	0.673032
ENSMUSG00000041817	0	-0.394069	7.76624	0.000368906	0.00175087
ENSMUSG00000026701	0	0.00306453	8.08472	0.0657511	0.0975444
ENSMUSG00000024498	0	-0.358272	7.92556	0.00130419	0.00428918
ENSMUSG00000019179	0	-0.0540747	8.17371	0.0147892	0.0285757
ENSMUSG00000072235	0	0.0807511	8.03775	0.000968963	0.00345153
ENSMUSG00000020594	0	-0.00677606	7.98492	0.000999924	0.0035235
ENSMUSG00000026380	0	-0.732341	7.18276	0.000468193	0.0020554
ENSMUSG00000029752	0	-0.395545	7.64022	2.5155e-05	0.000337762
ENSMUSG00000058013	0	-0.12248	7.88686	0.000160188	0.00100357
ENSMUSG00000030872	0	-0.127107	8.03412	0.205277	0.254721
ENSMUSG00000030970	0	-0.267712	7.75506	0.00179721	0.00543439
ENSMUSG00000055491	0	-0.524928	7.75929	7.82182e-05	0.000642289
ENSMUSG00000028433	0	-0.932539	7.63565	3.08284e-07	5.93474e-05
ENSMUSG00000042079	0	-0.166793	8.00738	0.0333139	0.0555384
ENSMUSG00000039682	0	-0.266964	7.76749	2.22827e-05	0.000313874
ENSMUSG00000037149	0	-0.0786884	8.07698	0.504053	0.547866
ENSMUSG00000038615	0	0.0733353	8.19462	0.12335	0.165575
ENSMUSG00000027750	0	0.804764	6.94618	7.38597e-08	3.69595e-05
ENSMUSG00000026341	0	0.142778	8.3883	0.000166931	0.00102676
ENSMUSG00000032555	0	-0.216983	7.99922	0.0107456	0.0220272
ENSMUSG00000002748	0	-0.0375118	8.12961	0.148617	0.194198
ENSMUSG00000072082	0	-0.661735	7.81222	9.91734e-06	0.00021699
ENSMUSG00000000751	0	-0.160743	7.72824	0.000258529	0.00137145
ENSMUSG00000028676	0	-0.434449	7.89029	0.000320308	0.00159362
ENSMUSG00000032231	0	0.66903	8.9687	3.32932e-06	0.000129708
ENSMUSG00000006219	0	-0.479582	7.3654	0.000127499	0.000868651
ENSMUSG00000042548	0	-0.330065	7.67017	1.09964e-05	0.000224074
ENSMUSG00000034928	0	-0.132658	7.84689	7.99624e-05	0.000649465
ENSMUSG00000022982	0	-0.177508	7.87774	0.00270325	0.00741479
ENSMUSG00000055302	0	-0.0708696	8.03828	0.375615	0.42623
ENSMUSG00000028788	0	0.0827323	8.32023	0.000169176	0.0010339
ENSMUSG00000024165	0	-0.0299054	8.09797	0.479603	0.524747
ENSMUSG00000012405	0	-0.0780057	7.98502	0.0211403	0.0381251
ENSMUSG00000026917	0	-0.25895	7.72034	0.000163926	0.00101772
ENSMUSG00000005481	0	0.076945	8.17819	0.0274883	0.0472811
ENSMUSG00000012443	0	-0.370261	7.95659	0.00179842	0.00543637
ENSMUSG00000068036	0	-0.375916	7.91566	0.00520955	0.0123612
ENSMUSG00000020572	0	-0.404845	7.45024	1.84263e-05	0.000283779
ENSMUSG00000022191	0	-0.209392	7.89018	0.00564651	0.0131674
ENSMUSG00000003435	0	0.00624564	8.02843	0.104368	0.143945
ENSMUSG00000047751	0	-0.47369	7.23696	0.000493828	0.0021296
ENSMUSG00000029581	0	-0.0590103	8.02628	0.175038	0.222579
ENSMUSG00000047945	0	-0.0710441	8.05808	0.580257	0.620823
ENSMUSG00000027002	0	0.131343	8.35896	0.000701113	0.00272474
ENSMUSG00000032387	0	-0.396173	7.36382	0.000575798	0.00236949
ENSMUSG00000027593	0	-0.073037	7.97187	0.0280327	0.048078
ENSMUSG00000078652	0	-0.118641	7.95355	0.0169227	0.0319224
ENSMUSG00000026775	0	-0.0329597	8.14534	0.0146686	0.0283928
ENSMUSG00000049517	0	-0.143058	7.89919	0.00247368	0.00692882
ENSMUSG00000052533	0	-0.147681	7.61343	3.51028e-06	0.000133016
ENSMUSG00000027469	0	-0.140408	8.05323	0.0626034	0.0936087
ENSMUSG00000028692	0	0.135545	8.2605	0.000783838	0.00295042
ENSMUSG00000023010	0	0.194733	8.38441	0.000497275	0.002139
ENSMUSG00000022241	0	-0.184138	7.81353	6.19527e-05	0.000562056
ENSMUSG00000003868	0	-0.197218	7.74493	0.00107705	0.00370467
ENSMUSG00000079477	0	0.090093	8.15635	0.0398026	0.0642616
ENSMUSG00000032712	0	-0.258904	7.77332	5.42806e-05	0.000518156
ENSMUSG00000025220	0	0.0822247	8.16614	0.00678323	0.015212
ENSMUSG00000041773	0	-0.0904249	8.0161	0.251334	0.30197
ENSMUSG00000052337	0	-0.0539867	7.9359	0.0066935	0.0150697
ENSMUSG00000033228	0	-0.168841	8.10723	0.000396996	0.00184571
ENSMUSG00000001441	0	-0.462546	7.7433	2.47917e-05	0.000335024
ENSMUSG00000025362	0	-0.0806497	7.97742	0.153263	0.199059
ENSMUSG00000031029	0	-0.0842484	7.96032	0.101014	0.139979
ENSMUSG00000050565	0	0.155057	8.35606	0.00163717	0.00506762
ENSMUSG00000028745	0	0.128327	8.36256	0.000125071	0.0008599
ENSMUSG00000052146	0	-0.142611	7.92115	0.0406857	0.0654274
ENSMUSG00000026790	0	-0.124569	7.94161	0.111214	0.151842
ENSMUSG00000036990	0	-0.286785	7.89108	0.00356771	0.0092125
ENSMUSG00000026116	0	-0.666604	7.65162	5.91057e-05	0.000545932
ENSMUSG00000030835	0	0.0304472	8.2704	6.14051e-05	0.000560006
ENSMUSG00000005312	0	-0.0904114	7.91855	0.0119383	0.02401
ENSMUSG00000031078	0	0.249412	8.46432	5.21199e-05	0.000506875
ENSMUSG00000056394	0	-0.36376	7.71433	6.46592e-05	0.000575897
ENSMUSG00000028195	0	0.13891	8.63128	5.55563e-08	3.49554e-05
ENSMUSG00000024456	0	-0.447534	7.58138	0.000134312	0.000894505
ENSMUSG00000021577	0	-0.0741149	7.95567	0.0745087	0.108356
ENSMUSG00000024002	0	-0.42668	7.83451	0.000335947	0.00165048
ENSMUSG00000014599	0	0.686952	8.19705	0.00309022	0.00823133
ENSMUSG00000090862	0	-0.151588	7.88932	0.0160221	0.0305227
ENSMUSG00000004530	0	-0.0146815	8.14608	0.00598473	0.0137876
ENSMUSG00000017221	0	-0.0109312	8.04188	0.728697	0.756981
ENSMUSG00000032458	0	0.092369	8.30004	0.000232836	0.00127908
ENSMUSG00000021149	0	-0.222304	7.85075	0.0200036	0.0364728
ENSMUSG00000028312	0	-0.276715	7.91025	0.00278618	0.00758536
ENSMUSG00000006445	0	0.129677	8.1131	0.148925	0.194486
ENSMUSG00000023025	0	-0.335559	7.69578	0.000175962	0.00105857
ENSMUSG00000031167	0	-0.20576	7.92398	0.0469171	0.0734305
ENSMUSG00000038335	0	-0.138709	7.94911	0.157073	0.203107
ENSMUSG00000063888	0	0.0212376	7.97175	0.0337311	0.0560801
ENSMUSG00000034667	0	-0.365735	7.62512	6.96125e-06	0.000186991
ENSMUSG00000000563	0	-0.0527531	8.0168	0.402429	0.451288
ENSMUSG00000024812	0	-0.302168	7.95285	0.00286068	0.0077526
ENSMUSG00000048874	0	-0.1244	8.0072	0.0310882	0.0524091
ENSMUSG00000028580	0	-0.180692	7.75369	4.24049e-05	0.000453076
ENSMUSG00000032560	0	-0.14765	7.76823	0.000427584	0.00193519
ENSMUSG00000005087	0	0.699762	8.36143	0.00742663	0.0163623
ENSMUSG00000021427	0	0.00100812	8.22344	0.000307254	0.00154311
ENSMUSG00000036822	0	-0.235635	7.73593	0.000823357	0.00306076
ENSMUSG00000020184	0	0.397324	8.50406	1.0227e-05	0.000218754
ENSMUSG00000031523	0	-0.177848	7.87623	0.0232216	0.0412062
ENSMUSG00000022255	0	-0.187545	7.84313	0.0113844	0.0231186
ENSMUSG00000006398	0	-0.00856351	7.98133	0.223196	0.273553
ENSMUSG00000029781	0	0.170126	8.49756	1.50935e-06	9.22254e-05
ENSMUSG00000076432	0	-0.34181	7.61933	2.5238e-05	0.000338281
ENSMUSG00000090841	0	0.139922	8.25611	0.000906534	0.00328622
ENSMUSG00000042688	0	-0.190882	7.76368	0.00442454	0.0108931
ENSMUSG00000028800	0	-0.100169	7.7981	0.00139234	0.0044896
ENSMUSG00000031818	0	-0.112858	7.92556	0.300971	0.352705
ENSMUSG00000063171	0	-0.247722	7.55753	0.00020483	0.00117223
ENSMUSG00000002957	0	-0.263082	8.10116	6.41965e-06	0.000179701
ENSMUSG00000020430	0	-0.137096	7.74018	0.000630925	0.00252485
ENSMUSG00000062270	0	0.00736656	7.93561	0.10179	0.140886
ENSMUSG00000014355	0	-0.506437	7.84817	3.16326e-05	0.000382695
ENSMUSG00000037458	0	0.105647	8.2963	0.000562985	0.00233338
ENSMUSG00000095567	0	-0.853129	7.52782	1.14348e-06	8.29562e-05
ENSMUSG00000066551	0	-0.244561	7.74165	0.000690452	0.00269333
ENSMUSG00000040761	0	-0.317079	7.50764	0.000218032	0.0012237
ENSMUSG00000029840	0	0.293108	8.29422	0.000598566	0.00243262
ENSMUSG00000032902	0	-0.220424	7.86296	0.0271394	0.0467873
ENSMUSG00000021877	0	0.219381	8.32627	0.000177224	0.00106354
ENSMUSG00000034165	0	-0.0164553	7.92648	0.252397	0.303054
ENSMUSG00000021500	0	-0.492787	7.69327	0.000116748	0.000823047
ENSMUSG00000020176	0	-0.172236	7.8649	0.0811305	0.116326
ENSMUSG00000030120	0	-0.0696133	8.05498	0.00108528	0.00372481
ENSMUSG00000030224	0	-0.0150355	8.02563	0.0310958	0.0524099
ENSMUSG00000046364	0	-0.20777	7.79901	0.00904254	0.0191643
ENSMUSG00000023942	0	-0.250267	7.85369	0.0943657	0.132287
ENSMUSG00000001424	0	-0.10544	8.01907	0.00203386	0.00597105
ENSMUSG00000006442	0	-0.261012	7.74194	0.00478497	0.0115515
ENSMUSG00000038095	0	-0.384698	7.5556	4.68543e-06	0.000150331
ENSMUSG00000030978	0	-0.169929	7.94066	0.00542854	0.0127745
ENSMUSG00000025651	0	-0.0383145	7.88802	0.288327	0.339793
ENSMUSG00000024908	0	0.00457234	7.94918	0.477179	0.522611
ENSMUSG00000030268	0	-0.462589	7.02849	0.000837301	0.00309611
ENSMUSG00000026547	0	0.30098	8.61324	1.09482e-05	0.000224074
ENSMUSG00000026605	0	-0.142866	7.6669	9.68369e-06	0.000214487
ENSMUSG00000033307	0	-0.238329	7.66424	0.000125294	0.00086035
ENSMUSG00000030980	0	-0.313146	7.48682	0.000338777	0.00165906
ENSMUSG00000029505	0	-0.455669	7.56162	3.51988e-05	0.000407423
ENSMUSG00000042557	0	-0.801676	7.19351	8.52817e-06	0.000204258
ENSMUSG00000062078	0	-0.179804	8.15887	7.92911e-05	0.000646645
ENSMUSG00000028953	0	-0.088926	7.78305	0.00433667	0.0107261
ENSMUSG00000027404	0	-0.118782	7.83497	0.153396	0.199161
ENSMUSG00000041220	0	-0.544597	7.29802	0.000705839	0.00273778
ENSMUSG00000097412	0	0.0749639	8.13924	0.0024631	0.00690537
ENSMUSG00000023110	0	0.0592894	7.75211	0.00108026	0.00371181
ENSMUSG00000023830	0	0.353488	8.26409	0.0006202	0.0024933
ENSMUSG00000001847	0	0.147012	8.24659	7.89438e-05	0.000645733
ENSMUSG00000070544	0	-0.160274	7.81286	0.0735889	0.107222
ENSMUSG00000042772	0	-0.619101	7.54219	0.000260694	0.0013786
ENSMUSG00000052459	0	0.10207	8.15806	3.59974e-05	0.000413067
ENSMUSG00000026192	0	-0.124417	7.75374	0.0158643	0.0302903
ENSMUSG00000000278	0	0.0304368	7.88359	0.203837	0.253307
ENSMUSG00000074698	0	-0.216933	7.60728	3.19796e-05	0.000385133
ENSMUSG00000040383	0	-0.183786	7.59698	1.83754e-05	0.000283391
ENSMUSG00000021037	0	-0.12229	7.64687	0.000209858	0.00119222
ENSMUSG00000030216	0	-0.152123	7.83049	0.110184	0.150689
ENSMUSG00000030058	0	0.205506	8.25313	0.000155366	0.000982611
ENSMUSG00000032249	0	-0.404289	7.5756	0.000694032	0.00270393
ENSMUSG00000018848	0	-0.0656537	7.7968	0.0614867	0.0921902
ENSMUSG00000025781	0	-0.18273	7.80655	0.0511951	0.0790605
ENSMUSG00000023118	0	-0.151476	7.80634	0.0341249	0.0566152
ENSMUSG00000031691	0	0.131865	7.94024	0.0510151	0.078838
ENSMUSG00000070348	0	-0.250724	7.84189	0.0934344	0.131233
ENSMUSG00000019471	0	-0.01045	7.80465	0.00824611	0.0177857
ENSMUSG00000030516	0	-0.106623	8.16305	9.97565e-05	0.000750002
ENSMUSG00000043858	0	-0.16771	7.70359	0.00372739	0.00952396
ENSMUSG00000029823	0	-0.258083	7.86701	0.00113368	0.00385853
ENSMUSG00000038014	0	0.0954694	8.02036	0.0406965	0.0654401
ENSMUSG00000040354	0	-0.180428	7.66652	0.000215353	0.00121389
ENSMUSG00000058546	0	-0.132382	7.75853	0.00807832	0.0175029
ENSMUSG00000073702	0	-0.0923081	7.8053	0.0890419	0.125958
ENSMUSG00000039323	0	-0.234596	7.78284	0.251181	0.301868
ENSMUSG00000038274	0	-0.0962001	7.83489	0.445133	0.491913
ENSMUSG00000063856	0	-0.0955725	7.85317	0.390598	0.440021
ENSMUSG00000037563	0	-0.0565442	7.84362	0.513344	0.556538
ENSMUSG00000072244	0	-0.215352	7.85778	0.0104096	0.0214466
ENSMUSG00000004951	0	0.119092	7.95164	0.373801	0.424567
ENSMUSG00000027433	0	-0.156183	7.82939	0.0561758	0.0854591
ENSMUSG00000019505	0	-0.0318339	7.84568	0.546905	0.588813
ENSMUSG00000032199	0	-0.258248	7.80416	0.00469408	0.0113893
ENSMUSG00000037857	0	-0.122213	7.55066	9.92701e-06	0.00021699
ENSMUSG00000021670	0	-0.0850777	7.96622	0.00442811	0.0108994
ENSMUSG00000001415	0	0.0491929	7.91316	0.242668	0.293179
ENSMUSG00000053110	0	-0.0421059	7.91472	0.0474947	0.0741758
ENSMUSG00000021824	0	0.195718	8.12077	0.000653097	0.00258687
ENSMUSG00000031924	0	0.0121472	7.73059	0.00025938	0.00137496
ENSMUSG00000029250	0	-0.0654449	7.80287	0.168666	0.21567
ENSMUSG00000055531	0	-0.653002	7.45929	1.19743e-05	0.000232762
ENSMUSG00000028757	0	0.0669989	8.13433	0.000640962	0.00255384
ENSMUSG00000034807	0	0.271787	8.51444	1.58219e-05	0.000264655
ENSMUSG00000025016	0	0.166191	8.30458	5.32796e-05	0.000512614
ENSMUSG00000060261	0	-0.890176	7.04623	4.99299e-08	3.49554e-05
ENSMUSG00000014195	0	-0.289977	7.63799	0.00348539	0.00903501
ENSMUSG00000005161	0	-0.146542	7.81304	0.111648	0.152321
ENSMUSG00000016018	0	-0.137498	7.71975	0.013468	0.0264895
ENSMUSG00000014867	0	0.29742	8.41237	6.20633e-05	0.000562413
ENSMUSG00000034160	0	-0.115316	7.63919	0.000236567	0.00129432
ENSMUSG00000034926	0	0.0834371	7.75831	0.000278717	0.00144433
ENSMUSG00000093904	0	-0.0736867	7.71798	0.00401443	0.010079
ENSMUSG00000047879	0	-0.0369875	7.91374	0.0139021	0.0272286
ENSMUSG00000014444	0	0.195815	8.20647	2.18002e-05	0.00031062
ENSMUSG00000028961	0	-0.0084717	7.73261	0.00164845	0.0050939
ENSMUSG00000029191	0	-0.265926	7.57493	0.000157416	0.000991859
ENSMUSG00000040084	0	-0.79087	7.13113	3.69712e-06	0.000134802
ENSMUSG00000039067	0	-0.135474	7.7293	0.0324752	0.0543425
ENSMUSG00000028410	0	-0.0271037	7.74551	0.00464717	0.011303
ENSMUSG00000041879	0	-0.24606	7.65771	0.00181887	0.00548459
ENSMUSG00000027206	0	-0.0146096	7.95754	0.00126951	0.0042058
ENSMUSG00000027671	0	-0.249751	7.40279	2.94392e-05	0.000368132
ENSMUSG00000032042	0	-0.0672401	7.79927	0.312883	0.364775
ENSMUSG00000039952	0	0.0463942	7.69556	0.00022284	0.00124142
ENSMUSG00000002102	0	0.0308244	7.92083	0.0700616	0.102879
ENSMUSG00000027379	0	-0.377676	7.58872	0.000231179	0.00127314
ENSMUSG00000003235	0	-0.124751	7.68806	0.0489073	0.0760357
ENSMUSG00000053754	0	-0.159364	7.5793	0.000151654	0.000968061
ENSMUSG00000036180	0	-0.104239	7.76867	0.328878	0.380713
ENSMUSG00000045136	0	-0.246188	7.36804	5.55676e-06	0.00016369
ENSMUSG00000002068	0	-0.35479	7.37003	0.000442396	0.00197897
ENSMUSG00000020708	0	-0.070855	7.7779	0.518016	0.561068
ENSMUSG00000027170	0	-0.155104	7.70712	0.036344	0.0595761
ENSMUSG00000001017	0	-0.196529	7.73178	0.0374211	0.0610588
ENSMUSG00000018770	0	-0.0999603	7.83454	0.0310517	0.0523677
ENSMUSG00000050917	0	-0.324391	6.97115	0.000451989	0.00200906
ENSMUSG00000030678	0	-0.315636	7.4667	4.37343e-05	0.000460499
ENSMUSG00000022312	0	-0.111209	7.76864	0.238178	0.288771
ENSMUSG00000078952	0	-0.738855	7.37144	0.000301186	0.00152283
ENSMUSG00000028138	0	-0.150371	7.68376	0.0162915	0.03095
ENSMUSG00000028423	0	-0.209476	7.66051	0.00904923	0.0191694
ENSMUSG00000046591	0	-0.386406	7.37657	0.00437734	0.0108097
ENSMUSG00000015733	0	-0.00173634	7.84733	0.437876	0.485458
ENSMUSG00000032437	0	-0.409999	7.81259	2.01821e-05	0.000297855
ENSMUSG00000053470	0	-0.451495	7.21934	2.60275e-05	0.000344096
ENSMUSG00000002602	0	0.624458	7.69203	0.00012425	0.000855598
ENSMUSG00000041846	0	-0.367711	7.6225	0.00184395	0.00554206
ENSMUSG00000032449	0	-0.186436	7.33407	2.8589e-07	5.80939e-05
ENSMUSG00000014349	0	-0.185346	7.80824	0.00150977	0.00477832
ENSMUSG00000037169	0	-0.823038	7.14167	0.000168529	0.00103177
ENSMUSG00000028164	0	-0.660059	7.07114	1.62283e-05	0.000266401
ENSMUSG00000062397	0	-0.373419	7.69254	0.00125558	0.00416552
ENSMUSG00000037712	0	0.166316	7.74701	0.0050089	0.0119849
ENSMUSG00000025823	0	0.0460788	7.99559	0.00227735	0.00650171
ENSMUSG00000026356	0	-0.136007	7.57207	0.000510646	0.00217986
ENSMUSG00000026042	0	0.680647	8.1667	0.00131093	0.00430256
ENSMUSG00000041360	0	-0.155248	7.55995	0.00668789	0.01506
ENSMUSG00000032383	0	0.0864644	8.09931	0.000195548	0.0011362
ENSMUSG00000067860	0	-0.411405	7.11545	0.00321222	0.00848262
ENSMUSG00000024045	0	-0.0988953	7.5334	0.000350938	0.00169534
ENSMUSG00000028577	0	-0.141793	7.71292	0.148989	0.194544
ENSMUSG00000054604	0	-0.349373	7.55191	0.00682032	0.0152733
ENSMUSG00000062006	0	-0.321085	7.62131	0.0122498	0.0245265
ENSMUSG00000004364	0	-0.0844545	7.80785	0.0767612	0.111107
ENSMUSG00000036323	0	0.0772826	8.0053	0.00014824	0.000951827
ENSMUSG00000024642	0	-0.498553	7.27918	0.00163235	0.00505628
ENSMUSG00000025492	0	-0.0513931	7.02847	1.07076e-06	8.11816e-05
ENSMUSG00000037072	0	0.2464	8.10102	0.000293058	0.0014936
ENSMUSG00000028478	0	-0.00731764	7.92001	0.000836466	0.00309406
ENSMUSG00000032604	0	-0.0234963	7.82351	0.220351	0.270672
ENSMUSG00000037266	0	0.0198416	7.66647	0.0138625	0.0271654
ENSMUSG00000055024	0	-0.126155	7.58662	0.00108213	0.00371648
ENSMUSG00000041712	0	-0.0588477	7.39559	3.24135e-05	0.000386601
ENSMUSG00000031068	0	-0.103685	7.80231	0.0178211	0.0332344
ENSMUSG00000042719	0	-0.281458	7.53033	0.000764243	0.00289922
ENSMUSG00000024659	0	0.723338	8.23789	0.000386227	0.00180921
ENSMUSG00000021190	0	0.266466	8.77903	9.71711e-07	7.86906e-05
ENSMUSG00000019132	0	-0.00599788	7.78915	0.960609	0.964962
ENSMUSG00000025047	0	-0.0514435	7.57968	0.000944494	0.00339153
ENSMUSG00000023852	0	-0.262515	7.75662	0.00106487	0.00367679
ENSMUSG00000040667	0	-0.175204	7.47687	1.02096e-05	0.000218596
ENSMUSG00000038393	0	0.04313	7.94437	0.0631759	0.094272
ENSMUSG00000021832	0	-0.0104827	7.76877	0.417414	0.465855
ENSMUSG00000035953	0	-0.122331	7.54981	0.000129097	0.000874246
ENSMUSG00000037706	0	0.224381	7.9818	0.00112827	0.00384282
ENSMUSG00000041355	0	0.0569778	7.79596	0.631071	0.667735
ENSMUSG00000001016	0	-0.314923	7.53563	0.000591155	0.00240964
ENSMUSG00000001472	0	0.0959106	8.04223	0.000208195	0.00118584
ENSMUSG00000020330	0	-0.0281073	7.70686	0.0726516	0.106061
ENSMUSG00000022789	0	-0.164661	7.68471	0.0778406	0.112332
ENSMUSG00000060073	0	-0.102566	7.72073	0.323425	0.375331
ENSMUSG00000033306	0	0.570255	8.25092	0.00493986	0.0118585
ENSMUSG00000053565	0	-0.0985558	7.61212	0.00532964	0.0125849
ENSMUSG00000032745	0	-0.227233	7.6177	0.0112519	0.0229012
ENSMUSG00000044791	0	0.0855346	7.88108	0.0197049	0.036031
ENSMUSG00000024120	0	-0.11894	7.47562	0.000186709	0.00110296
ENSMUSG00000041133	0	-0.162379	7.67973	0.0817782	0.117132
ENSMUSG00000001833	0	0.125075	8.00514	0.000260538	0.00137853
ENSMUSG00000000078	0	0.162786	8.40961	4.67312e-08	3.49554e-05
ENSMUSG00000021840	0	-0.162079	7.80217	0.00190536	0.00568524
ENSMUSG00000061607	0	-0.146757	7.28282	1.27611e-06	8.59066e-05
ENSMUSG00000026843	0	-0.237711	7.50528	0.00195533	0.00579574
ENSMUSG00000045482	0	0.103365	7.82386	0.384577	0.434541
ENSMUSG00000024091	0	-0.21118	7.77824	0.00056358	0.00233409
ENSMUSG00000053411	0	-0.349338	7.50719	0.0350404	0.0578193
ENSMUSG00000066306	0	-0.426202	7.45613	6.7737e-05	0.000590424
ENSMUSG00000002984	0	-0.05008	7.6515	0.033355	0.0555809
ENSMUSG00000020257	0	-0.223825	7.51432	0.000469784	0.00205951
ENSMUSG00000022100	0	-0.250072	7.69137	0.0024477	0.00687227
ENSMUSG00000030754	0	0.0456986	8.05406	0.000132511	0.00088878
ENSMUSG00000005417	0	0.33426	8.16549	0.00025252	0.00134928
ENSMUSG00000027660	0	-0.263574	7.59221	0.0192823	0.035465
ENSMUSG00000025332	0	-0.190961	7.61151	0.0317626	0.0533779
ENSMUSG00000004665	0	0.343466	8.18573	3.47246e-05	0.000402839
ENSMUSG00000029920	0	-0.316927	7.47491	0.00161137	0.00501179
ENSMUSG00000006304	0	0.263786	8.1946	4.43066e-05	0.000464574
ENSMUSG00000021109	0	-0.0442527	7.92283	0.000882159	0.00321967
ENSMUSG00000011256	0	-0.455546	7.76408	0.000612011	0.00247351
ENSMUSG00000043439	0	-0.230266	7.69503	0.0467936	0.0732895																			-0.230266	0.0965961	-0.0647911	0.852478	1.06925	0.956084
ENSMUSG00000031591	0	0.155224	8.07404	5.19946e-05	0.000506422
ENSMUSG00000023018	0	-0.232121	7.31654	8.28684e-06	0.000203277
ENSMUSG00000030603	0	-0.0175696	7.73739	0.961768	0.966082
ENSMUSG00000056999	0	-0.194357	7.34752	2.25221e-06	0.000111123
ENSMUSG00000019923	0	0.290899	8.15405	3.30938e-05	0.00039237
ENSMUSG00000030138	0	-0.114756	7.57954	0.00704467	0.0156861
ENSMUSG00000000001	0	0.0809789	8.07651	0.000173163	0.00104805
ENSMUSG00000032939	0	-0.109247	7.52102	0.000996513	0.00351825
ENSMUSG00000022464	0	0.0302656	7.34971	0.00107517	0.00370217
ENSMUSG00000024542	0	-0.392419	7.48059	0.000392161	0.00182686
ENSMUSG00000005698	0	-0.309652	7.54991	0.00590473	0.0136563
ENSMUSG00000029817	0	-0.561533	7.44215	0.000115138	0.000816948
ENSMUSG00000034391	0	-0.0524234	7.50922	0.000475064	0.00207643
ENSMUSG00000001467	0	-0.0531027	7.57049	0.00277909	0.0075698
ENSMUSG00000024370	0	-0.09336	7.68683	0.476486	0.521961
ENSMUSG00000029512	0	-0.552454	7.15452	2.30731e-05	0.000321092
ENSMUSG00000031633	0	0.198844	8.17721	8.45936e-07	7.66553e-05
ENSMUSG00000015961	0	-0.219751	7.66909	0.0315412	0.0530342
ENSMUSG00000020936	0	0.00418245	7.74747	0.923581	0.932376
ENSMUSG00000023169	0	-0.246265	8.08438	1.82155e-05	0.000281916
ENSMUSG00000006494	0	-0.685454	6.77546	3.00186e-05	0.000372618
ENSMUSG00000004535	0	0.0371632	7.84974	0.00789163	0.017214
ENSMUSG00000028063	0	0.541275	8.53104	3.24579e-06	0.000129044
ENSMUSG00000026750	0	-0.0307745	7.77794	0.0626265	0.0936368
ENSMUSG00000022905	0	-0.245054	7.48898	0.00214083	0.00620593
ENSMUSG00000038733	0	0.00182533	7.98984	0.00038167	0.00179361
ENSMUSG00000030084	0	0.25279	8.03931	0.000659997	0.00260741
ENSMUSG00000030619	0	-0.221605	7.47278	0.00836733	0.0180011
ENSMUSG00000079614	0	-0.515762	7.48191	0.000101469	0.000757429
ENSMUSG00000035851	0	-0.128674	7.7932	0.000435618	0.00195983
ENSMUSG00000051329	0	-0.161948	7.56663	0.00865267	0.0184917
ENSMUSG00000032185	0	-0.301972	7.49118	0.000540068	0.0022723
ENSMUSG00000003778	0	-0.294818	7.54553	0.00474853	0.0114897
ENSMUSG00000011114	0	0.0662315	7.93123	0.00167211	0.00515539
ENSMUSG00000053332	0	-0.0739168	7.68786	0.503548	0.547425
ENSMUSG00000028798	0	-0.145434	7.63557	0.140321	0.18492
ENSMUSG00000021486	0	0.0526302	7.90064	0.000793223	0.00297574
ENSMUSG00000020029	0	-0.116428	7.86572	4.3599e-05	0.000459569
ENSMUSG00000029202	0	-0.471476	7.45244	8.18409e-05	0.000660567
ENSMUSG00000005981	0	0.0575485	7.42945	3.07956e-05	0.000378285
ENSMUSG00000025423	0	-0.422658	7.26312	0.000720378	0.00277748
ENSMUSG00000006273	0	0.0695885	7.87071	0.00124587	0.00413771
ENSMUSG00000024423	0	-0.496586	7.26868	7.5277e-05	0.000626243
ENSMUSG00000003402	0	0.234008	7.98738	0.000770853	0.00291574
ENSMUSG00000041638	0	-0.356175	7.53063	0.00072193	0.00278053
ENSMUSG00000049553	0	-0.0208016	7.41055	0.000263031	0.00138628
ENSMUSG00000037119	0	0.0461841	7.94978	0.000359509	0.00172303
ENSMUSG00000027111	0	-0.166753	7.58328	0.00270491	0.00741839
ENSMUSG00000032193	0	-0.267635	7.64919	0.0314415	0.0528941
ENSMUSG00000022437	0	-0.178407	7.53698	0.0114215	0.0231839
ENSMUSG00000022536	0	0.00515568	7.71994	0.854535	0.870844
ENSMUSG00000035960	0	-0.192666	7.35351	0.000346536	0.00168254
ENSMUSG00000055148	0	-0.663601	6.67203	0.000118559	0.000831326
ENSMUSG00000017119	0	0.0489094	7.67829	0.259944	0.31097
ENSMUSG00000009073	0	-0.18877	7.31241	3.53112e-06	0.000133016
ENSMUSG00000028960	0	-0.226387	7.48009	0.00154339	0.00485208
ENSMUSG00000038991	0	0.16625	8.23277	1.50226e-05	0.000258173
ENSMUSG00000031835	0	-0.0463128	7.68872	0.642148	0.677822
ENSMUSG00000038429	0	-0.0721699	7.61045	0.106317	0.14622
ENSMUSG00000027566	0	-0.163547	7.57232	0.0426675	0.0679719
ENSMUSG00000028409	0	-0.0970991	7.60574	0.147561	0.192956
ENSMUSG00000020720	0	-0.0627062	7.67512	0.580747	0.621165
ENSMUSG00000071054	0	-0.386581	7.45666	0.000674187	0.00264729
ENSMUSG00000061032	0	-0.069933	7.52643	0.000656277	0.00259507
ENSMUSG00000017428	0	-0.0676642	7.64887	0.610903	0.648929
ENSMUSG00000025580	0	-0.150556	7.62565	0.172799	0.22016
ENSMUSG00000020949	0	-0.26454	7.42008	0.000751241	0.00285782
ENSMUSG00000005779	0	-0.0735083	7.71717	0.0606313	0.0910444
ENSMUSG00000075700	0	0.00768274	7.93648	4.40071e-05	0.00046276
ENSMUSG00000037058	0	-0.0596355	7.51003	0.000408231	0.00187794
ENSMUSG00000029687	0	-0.397864	7.37747	0.000238713	0.00130109
ENSMUSG00000028633	0	-0.0979484	7.60353	0.192832	0.241643
ENSMUSG00000053510	0	0.0275636	7.73125	0.479331	0.524535
ENSMUSG00000020994	0	-0.334829	7.54184	0.00135561	0.00440223
ENSMUSG00000039456	0	-0.582132	7.19479	4.6254e-05	0.000474785
ENSMUSG00000005625	0	0.0248604	7.68255	0.736235	0.763927
ENSMUSG00000003316	0	0.113828	7.74199	0.179982	0.228039
ENSMUSG00000073676	0	-0.183768	7.46237	0.00234543	0.00664765
ENSMUSG00000018921	0	-0.0788715	7.37999	5.42789e-05	0.000518156
ENSMUSG00000025151	0	0.185744	7.99004	0.000568386	0.00234646
ENSMUSG00000071646	0	-0.0624091	7.75752	0.0018409	0.00553732
ENSMUSG00000049969	0	-0.54535	7.38646	0.00191266	0.00570071
ENSMUSG00000019370	0	-0.0283266	7.72863	0.0377959	0.0615607
ENSMUSG00000055296	0	-0.24761	7.7385	6.41969e-05	0.000574109
ENSMUSG00000024422	0	0.0960977	7.62039	0.0374203	0.0610588
ENSMUSG00000040325	0	-0.14147	7.45136	0.000416746	0.00190223
ENSMUSG00000019820	0	0.0515656	7.7216	0.0386788	0.0627472
ENSMUSG00000018042	0	0.301075	8.03368	0.000375935	0.00177425
ENSMUSG00000038943	0	-0.249873	7.76601	0.000110878	0.000799431
ENSMUSG00000013787	0	-0.0331227	7.68157	0.45965	0.505917
ENSMUSG00000028430	0	-0.142114	7.33167	0.000238199	0.00130038
ENSMUSG00000031592	0	-0.325754	7.47904	0.0139788	0.0273544
ENSMUSG00000018340	0	0.275757	7.58093	0.00175202	0.00533477
ENSMUSG00000026421	0	0.505674	8.47097	3.04455e-06	0.000124613
ENSMUSG00000027808	0	-0.0575479	7.75282	0.00565347	0.013178
ENSMUSG00000027823	0	-0.199764	7.57263	0.027249	0.046932
ENSMUSG00000010205	0	-0.231892	7.4274	0.0014503	0.00463093
ENSMUSG00000029246	0	-0.286766	7.49007	0.00767253	0.0168264
ENSMUSG00000026926	0	0.126223	7.89981	0.000303732	0.00152953
ENSMUSG00000033565	0	-0.123699	7.3744	2.16306e-05	0.000309694
ENSMUSG00000023022	0	-0.108221	7.47073	0.00218746	0.00630249
ENSMUSG00000018965	0	-0.173219	7.58069	0.0675426	0.0998242
ENSMUSG00000035202	0	-0.0485421	7.84379	0.501508	0.545505
ENSMUSG00000020074	0	-0.163317	7.64815	0.0101935	0.0210904
ENSMUSG00000028792	0	-0.0578507	7.45007	0.00030241	0.00152537
ENSMUSG00000026796	0	0.492205	8.375	7.35648e-06	0.000192222
ENSMUSG00000033014	0	-0.774905	7.27257	7.58604e-06	0.000195174
ENSMUSG00000029686	0	-0.0749672	7.75648	0.00140869	0.00453102
ENSMUSG00000020680	0	-0.342254	7.39192	0.000379329	0.00178604
ENSMUSG00000024660	0	-0.325089	7.57766	0.00281586	0.00765191
ENSMUSG00000021929	0	-0.299374	7.40718	0.00516331	0.0122807
ENSMUSG00000018481	0	-0.114443	7.72098	0.00875837	0.0186626
ENSMUSG00000028156	0	-0.211469	7.56286	0.0193909	0.0356201
ENSMUSG00000029833	0	-0.305118	7.53309	0.00263955	0.00728646
ENSMUSG00000004880	0	-0.458976	7.14343	2.79566e-06	0.000118782
ENSMUSG00000022205	0	-0.212587	7.49494	0.0342449	0.0567744
ENSMUSG00000020863	0	-0.183008	7.46498	0.0033002	0.00865926
ENSMUSG00000001089	0	-0.122513	7.56201	0.063675	0.094907
ENSMUSG00000024081	0	-0.0419627	7.47272	0.000447431	0.0019958
ENSMUSG00000021807	0	-0.153556	7.62824	0.00983523	0.020496
ENSMUSG00000079435	0	-0.152599	7.42816	0.00109587	0.00375193
ENSMUSG00000022360	0	-0.359352	7.24874	9.41902e-05	0.000724079
ENSMUSG00000018765	0	-0.104798	7.54091	0.1332	0.176714
ENSMUSG00000030779	0	-0.106837	7.4017	0.000105009	0.000772774
ENSMUSG00000042506	0	-0.348964	7.7079	0.000115445	0.000817906
ENSMUSG00000000031	0	0.747908	8.04256	1.47378e-05	0.00025547
ENSMUSG00000038279	0	-0.0905402	7.46755	0.0335377	0.0558266
ENSMUSG00000020585	0	0.308439	7.99727	0.000149705	0.000958129
ENSMUSG00000070319	0	-0.116239	7.52433	0.107941	0.148119
ENSMUSG00000024222	0	-0.224325	6.95494	0.000257786	0.00136883
ENSMUSG00000038848	0	-0.247223	7.70324	0.000552881	0.00230551
ENSMUSG00000028514	0	-0.24205	7.66866	0.000166033	0.00102434
ENSMUSG00000022551	0	-0.15717	7.47391	0.019116	0.0352183
ENSMUSG00000025503	0	-0.00845861	7.48988	0.00121644	0.00406021
ENSMUSG00000046062	0	-0.200658	7.59341	0.0483378	0.0752675
ENSMUSG00000042133	0	-0.0960645	7.63285	0.0434477	0.0689994
ENSMUSG00000022246	0	-0.055549	7.8341	0.000687064	0.00268408
ENSMUSG00000031672	0	-0.0794805	7.57705	0.447852	0.494619
ENSMUSG00000039367	0	-0.0834152	7.68127	0.0161494	0.0307279
ENSMUSG00000054405	0	-0.10396	7.47059	0.00426803	0.0105921
ENSMUSG00000037643	0	-0.10851	7.75519	0.000565178	0.00233792
ENSMUSG00000024472	0	-0.253423	7.05685	5.95359e-06	0.000170794
ENSMUSG00000026669	0	-0.437462	7.32893	0.00184764	0.00554768
ENSMUSG00000021728	0	-0.361353	6.95324	2.03516e-05	0.000299555
ENSMUSG00000025162	0	0.0430127	7.78006	0.00178001	0.00540006
ENSMUSG00000022141	0	-0.252711	7.4652	0.0263447	0.0457152
ENSMUSG00000019942	0	-0.160271	7.64177	0.00296755	0.0079821
ENSMUSG00000030096	0	-0.164326	7.34403	0.00198398	0.00586166
ENSMUSG00000026457	0	-0.225672	7.62918	0.000304607	0.00153324
ENSMUSG00000030591	0	0.191942	7.86054	0.00011867	0.000831624
ENSMUSG00000020307	0	-0.0599975	7.71594	0.00418744	0.0104381
ENSMUSG00000017707	0	0.344792	8.10678	5.88322e-05	0.000544551
ENSMUSG00000028431	0	-0.114941	7.48765	0.0371672	0.0607079
ENSMUSG00000037470	0	0.138442	7.95477	0.000119833	0.000835984
ENSMUSG00000021024	0	-0.0725207	7.50605	0.0270902	0.0467355
ENSMUSG00000028367	0	-0.0198634	7.64274	0.223527	0.273891
ENSMUSG00000029623	0	-0.173424	7.46941	0.0179822	0.0334778
ENSMUSG00000019777	0	-0.160974	7.38394	0.000717431	0.00276903
ENSMUSG00000026245	0	-0.216057	7.37123	0.00106511	0.00367702
ENSMUSG00000025234	0	-0.0192653	7.57508	0.801393	0.823379
ENSMUSG00000059119	0	0.0557541	7.65603	0.426758	0.474955
ENSMUSG00000044447	0	-0.361348	7.38156	0.00269441	0.00739883
ENSMUSG00000033863	0	-0.158506	7.38851	0.000380045	0.00178865
ENSMUSG00000025995	0	-0.123655	7.42696	0.010401	0.0214308
ENSMUSG00000028868	0	0.22899	7.65431	0.00433636	0.0107261
ENSMUSG00000006800	0	0.0888559	7.88903	0.000141301	0.000924841
ENSMUSG00000032348	0	-0.386603	6.7793	4.35104e-05	0.000459569
ENSMUSG00000027506	0	-0.36523	7.02062	0.000122397	0.000847091
ENSMUSG00000025027	0	-0.0476878	7.84466	7.34569e-05	0.000617587
ENSMUSG00000036737	0	-0.315141	7.40446	0.00136911	0.00443594
ENSMUSG00000094483	0	-0.123933	7.54474	0.322492	0.374427
ENSMUSG00000015671	0	-0.0975764	7.54547	0.364189	0.415172
ENSMUSG00000026914	0	-0.00726054	7.67367	0.0197837	0.0361413
ENSMUSG00000037275	0	-0.337125	7.12324	0.000144555	0.000937749
ENSMUSG00000030884	0	-0.161964	7.50568	0.0610101	0.0915318
ENSMUSG00000046432	0	-0.0648507	8.01762	6.37323e-06	0.000179087
ENSMUSG00000027185	0	-0.31797	7.20864	0.000127496	0.000868651
ENSMUSG00000044308	0	-0.176267	7.50238	0.0697941	0.102572
ENSMUSG00000026837	0	0.776371	8.3533	1.51679e-05	0.000260059
ENSMUSG00000024772	0	0.0684613	7.95813	4.32447e-05	0.000457814
ENSMUSG00000008604	0	-0.541226	7.20375	6.57554e-05	0.000581882
ENSMUSG00000032504	0	0.332253	8.18831	1.6543e-05	0.000269328
ENSMUSG00000026924	0	-0.276055	7.55585	0.00182807	0.00550553
ENSMUSG00000034484	0	-0.0115924	7.87053	5.36432e-05	0.000514676
ENSMUSG00000027852	0	-0.127616	7.61595	0.0141301	0.0275889
ENSMUSG00000022385	0	0.117443	7.68275	0.140762	0.185346
ENSMUSG00000025544	0	0.10027	7.84542	0.000531612	0.00224447
ENSMUSG00000038437	0	-0.1312	7.14507	0.00142159	0.00456316
ENSMUSG00000032777	0	0.0680128	7.75153	0.0013354	0.00435859
ENSMUSG00000058290	0	-0.243833	7.15913	1.26312e-05	0.000239175
ENSMUSG00000067150	0	-0.155476	7.44803	0.03004	0.0509659
ENSMUSG00000057863	0	-0.152829	7.43839	0.0304546	0.0515708
ENSMUSG00000025403	0	-0.175358	7.12355	3.87949e-06	0.000138274
ENSMUSG00000024644	0	0.0899184	7.54746	0.0164495	0.0311852
ENSMUSG00000052488	0	-0.309265	7.42492	0.0033375	0.0087373
ENSMUSG00000029599	0	-0.0125487	7.45314	0.00278663	0.00758563
ENSMUSG00000002227	0	-0.709839	6.78263	1.28711e-07	4.34567e-05
ENSMUSG00000020899	0	-0.301001	7.16579	0.000455828	0.00201994
ENSMUSG00000066568	0	-0.190727	7.40032	0.00930914	0.0195988
ENSMUSG00000039756	0	-0.123636	7.49622	0.198246	0.247381
ENSMUSG00000020407	0	-0.601176	6.91904	5.48335e-06	0.00016284
ENSMUSG00000000131	0	-0.518376	7.38446	1.84568e-05	0.000284049
ENSMUSG00000041841	0	-0.109358	7.45911	0.0386754	0.0627463
ENSMUSG00000055612	0	-0.488811	6.90127	0.000498688	0.00214298
ENSMUSG00000038299	0	-0.158798	7.3952	0.0277033	0.04758
ENSMUSG00000052727	0	-0.0658064	7.14735	2.18979e-05	0.00031098
ENSMUSG00000024844	0	-0.171917	7.39233	0.00952779	0.0199751
ENSMUSG00000036986	0	-0.519845	6.82525	2.493e-05	0.000335858
ENSMUSG00000021413	0	-0.208674	7.39272	0.00483618	0.0116529
ENSMUSG00000058600	0	-0.114563	7.38702	0.00217557	0.00628555
ENSMUSG00000022052	0	-0.0604292	7.70459	0.000214468	0.00120995
ENSMUSG00000041815	0	-0.0358099	7.67807	0.0110495	0.022547
ENSMUSG00000020580	0	0.343843	7.978	0.000182805	0.00108575
ENSMUSG00000032198	0	-0.528097	6.76233	1.77477e-06	9.98695e-05
ENSMUSG00000015120	0	-0.128254	7.50091	0.195169	0.244056
ENSMUSG00000037071	0	-0.251094	7.1007	3.6935e-06	0.000134802
ENSMUSG00000027782	0	0.0738022	7.77925	0.000708647	0.00274527
ENSMUSG00000025066	0	-0.0615684	7.41741	0.00658975	0.0148831
ENSMUSG00000017999	0	-0.8168	7.12788	7.77409e-06	0.000197004
ENSMUSG00000061613	0	-0.221018	7.32068	0.000958314	0.00342415
ENSMUSG00000034681	0	-0.0458701	7.46252	0.0242361	0.0427114
ENSMUSG00000020089	0	-0.242607	7.40996	0.0188229	0.0347599
ENSMUSG00000003644	0	-0.167247	7.62879	0.00429221	0.0106425
ENSMUSG00000058392	0	-0.00715679	7.23465	0.00060844	0.00246181
ENSMUSG00000045763	0	0.162201	7.79148	0.000173545	0.00104951
ENSMUSG00000017677	0	0.146221	8.03108	6.93388e-06	0.000186942
ENSMUSG00000009013	0	-0.0768883	7.535	0.441113	0.48838
ENSMUSG00000001783	0	-0.014546	7.58814	0.349067	0.40066
ENSMUSG00000018286	0	-0.101995	7.45846	0.152618	0.198409
ENSMUSG00000006676	0	0.11301	7.70718	0.0117837	0.023771
ENSMUSG00000001552	0	-0.00619682	7.88097	0.00040801	0.00187794
ENSMUSG00000027500	0	-0.467177	6.66005	0.000354879	0.00170786
ENSMUSG00000018677	0	-0.241803	7.29357	0.000642593	0.00255755
ENSMUSG00000022565	0	0.53564	8.04607	4.9682e-05	0.000495826
ENSMUSG00000041852	0	-0.209806	7.26768	0.000236266	0.00129308
ENSMUSG00000001270	0	-0.0621627	7.55511	0.0482909	0.075216
ENSMUSG00000041560	0	-0.146992	7.4038	0.0224375	0.0400629
ENSMUSG00000019978	0	-0.0530344	7.37468	0.00549729	0.0128941
ENSMUSG00000075706	0	0.0394278	7.44571	0.00363907	0.00935273
ENSMUSG00000030016	0	-0.526354	7.1418	2.34537e-05	0.000324008
ENSMUSG00000021193	0	-0.160629	7.34349	0.00154059	0.00484841
ENSMUSG00000095180	0	0.140662	7.67832	0.230668	0.281329
ENSMUSG00000059474	0	-0.354983	7.15683	0.000349945	0.00169235
ENSMUSG00000027082	0	0.371378	8.6597	1.32858e-06	8.65191e-05
ENSMUSG00000019877	0	0.346973	8.04103	5.96877e-05	0.000548537
ENSMUSG00000024583	0	-0.0450652	7.64	0.00289174	0.00782088
ENSMUSG00000028560	0	-0.434581	7.26836	0.00194419	0.00577128
ENSMUSG00000020456	0	-0.0364061	7.64052	0.00713375	0.0158491
ENSMUSG00000026596	0	-0.0781605	7.70541	0.00327787	0.00862002
ENSMUSG00000026187	0	-0.200466	7.10488	0.000120463	0.000839001
ENSMUSG00000041168	0	0.163709	7.53561	0.00846644	0.0181645
ENSMUSG00000028932	0	0.0682886	7.579	0.476373	0.521864
ENSMUSG00000028330	0	-0.472174	7.26608	0.000256446	0.0013637
ENSMUSG00000041645	0	0.0432776	7.46587	0.00425531	0.0105653
ENSMUSG00000020265	0	-0.44822	7.26255	0.000218076	0.0012237
ENSMUSG00000027520	0	-0.268228	6.97933	0.000789848	0.00296646
ENSMUSG00000027282	0	-0.100483	7.38653	0.012677	0.0252138
ENSMUSG00000007458	0	0.219134	7.75234	0.00109133	0.00373832
ENSMUSG00000006673	0	-0.168206	7.48712	0.0688057	0.101363
ENSMUSG00000031826	0	-0.30415	7.21902	0.000266904	0.00140064
ENSMUSG00000040725	0	-0.214622	7.41732	0.0185489	0.0343291
ENSMUSG00000058301	0	-0.139087	7.40188	0.0395676	0.0639339
ENSMUSG00000032301	0	-0.082736	7.46817	0.330374	0.382283
ENSMUSG00000005442	0	-0.505697	7.31554	4.71309e-05	0.000479848
ENSMUSG00000052681	0	0.144776	7.8654	5.49982e-05	0.000523393
ENSMUSG00000032525	0	-0.0812901	7.64091	0.0131333	0.0259404
ENSMUSG00000022892	0	0.838067	8.39192	1.00247e-05	0.000217609
ENSMUSG00000045294	0	-0.176	7.50757	0.0464906	0.0728982
ENSMUSG00000039509	0	-0.31774	7.18213	0.00036397	0.0017357
ENSMUSG00000038816	0	-0.570412	7.00686	0.00805645	0.0174831
ENSMUSG00000046897	0	-0.224057	7.06622	6.28782e-06	0.000177597
ENSMUSG00000021242	0	0.309546	7.70859	0.00290221	0.00784383
ENSMUSG00000022781	0	-0.0217911	7.72346	0.000247892	0.00133437
ENSMUSG00000020612	0	0.171407	7.85109	2.79147e-05	0.000358676
ENSMUSG00000030208	0	0.6722	7.8322	0.00094873	0.00340209
ENSMUSG00000038914	0	-0.0121917	7.5388	0.0186994	0.0345755
ENSMUSG00000020063	0	-0.400204	7.15935	0.000677794	0.0026586
ENSMUSG00000027091	0	-0.0736197	7.50925	0.176925	0.224712
ENSMUSG00000029363	0	-0.104764	7.36581	0.00634578	0.014451
ENSMUSG00000045328	0	-0.0484205	7.66618	0.00151995	0.00480516
ENSMUSG00000022142	0	-0.175432	7.32689	0.00206081	0.00603504
ENSMUSG00000039967	0	-0.533079	6.75947	1.64241e-06	9.56082e-05
ENSMUSG00000062762	0	-0.113254	7.44767	0.474564	0.520193
ENSMUSG00000032374	0	0.269148	8.70472	6.78967e-07	7.31166e-05
ENSMUSG00000005413	0	0.380825	7.77722	0.000252568	0.00134928
ENSMUSG00000026977	0	-0.158428	7.54102	0.00375117	0.00956024
ENSMUSG00000029144	0	-0.212016	7.45163	0.00792456	0.0172721
ENSMUSG00000004591	0	-0.164877	7.46324	0.0404897	0.0651648
ENSMUSG00000008976	0	-0.345178	7.25406	0.00650007	0.014727
ENSMUSG00000046841	0	0.244924	8.18096	6.32771e-06	0.000178244
ENSMUSG00000038708	0	-0.0437946	7.44526	0.373864	0.424614
ENSMUSG00000001576	0	0.144074	7.58794	0.190437	0.239133
ENSMUSG00000026827	0	-0.226889	7.25769	0.000956681	0.00341999
ENSMUSG00000020547	0	-0.21372	7.2699	0.000890383	0.00324429
ENSMUSG00000057421	0	-0.110355	7.26888	0.00044079	0.0019746
ENSMUSG00000039001	0	-0.135253	7.39649	0.100761	0.139717
ENSMUSG00000022394	0	-0.282674	7.20138	0.00741251	0.0163377
ENSMUSG00000041891	0	0.0821811	7.66902	0.00336185	0.00878637
ENSMUSG00000041438	0	-0.0149439	7.41166	0.0306799	0.0518682
ENSMUSG00000031490	0	-0.20241	7.15534	1.8689e-05	0.000284906
ENSMUSG00000029407	0	-0.0765299	7.69088	4.42397e-05	0.000464254
ENSMUSG00000037013	0	-0.27522	7.27113	0.00947887	0.0198894
ENSMUSG00000002319	0	0.00599177	7.48893	0.98727	0.988562
ENSMUSG00000000441	0	-0.574063	7.30401	1.32299e-05	0.000244191
ENSMUSG00000005687	0	-0.363069	7.19731	0.00107485	0.00370192
ENSMUSG00000063316	0	-0.152414	7.35047	0.026154	0.0454707
ENSMUSG00000001151	0	-0.1666	7.31485	0.00498696	0.0119428
ENSMUSG00000024795	0	-0.644783	7.05271	1.11678e-05	0.000224646
ENSMUSG00000052752	0	0.0251524	7.53081	0.331786	0.383614
ENSMUSG00000046330	0	-0.122058	7.39244	0.151656	0.197405
ENSMUSG00000019437	0	-0.159021	7.37565	0.0474061	0.0740639
ENSMUSG00000056692	0	-0.102454	7.39127	0.0540187	0.0826762
ENSMUSG00000030232	0	-0.167751	7.24975	0.00285922	0.00775076
ENSMUSG00000038374	0	-0.167179	7.32486	0.0140494	0.0274632
ENSMUSG00000030605	0	0.32131	7.90398	0.00105067	0.00364443
ENSMUSG00000029860	0	0.581834	8.09945	3.36202e-05	0.000396256
ENSMUSG00000061665	0	-0.233978	7.57813	6.97625e-05	0.000599807
ENSMUSG00000028180	0	-0.146162	7.44314	0.096636	0.134978
ENSMUSG00000036617	0	-0.274635	7.40823	0.0159181	0.0303694
ENSMUSG00000006585	0	-0.284985	7.24208	0.00790216	0.0172318
ENSMUSG00000041483	0	-0.269511	7.15637	0.00135461	0.00440028
ENSMUSG00000028948	0	-0.0514649	7.25108	0.00085324	0.0031376
ENSMUSG00000060279	0	-0.101106	7.46319	0.0569162	0.0863759
ENSMUSG00000060636	0	-0.170836	7.29558	0.00343323	0.00893569
ENSMUSG00000068220	0	0.495573	7.83189	0.000162467	0.00101206
ENSMUSG00000031954	0	-0.164699	7.33158	0.0144572	0.0280702
ENSMUSG00000006299	0	-0.0371102	7.45009	0.307745	0.359664
ENSMUSG00000029014	0	-0.173536	7.29333	0.0178658	0.0333008
ENSMUSG00000034022	0	-0.215579	7.22713	0.000619777	0.00249252
ENSMUSG00000028345	0	-0.46071	7.18043	0.000274743	0.00143117
ENSMUSG00000025439	0	-0.253963	7.20363	0.0011954	0.00401197
ENSMUSG00000008475	0	0.0417291	7.76746	9.84578e-05	0.000743168
ENSMUSG00000020198	0	0.171765	7.73535	0.00129814	0.00427186
ENSMUSG00000070327	0	0.363473	6.29309	8.41773e-08	4.01599e-05
ENSMUSG00000030751	0	-0.0680585	7.42276	0.563105	0.604092
ENSMUSG00000039678	0	-0.398966	7.09765	0.00337486	0.00881512
ENSMUSG00000074994	0	-0.879908	6.68284	1.85151e-05	0.000284293
ENSMUSG00000036777	0	-0.647167	7.39703	2.28437e-06	0.000111543
ENSMUSG00000056429	0	0.369497	8.01028	5.298e-05	0.000511031
ENSMUSG00000017774	0	0.394036	8.13675	2.91192e-06	0.000121031
ENSMUSG00000022178	0	-0.445288	7.1074	0.0043323	0.0107187
ENSMUSG00000011752	0	-0.13276	7.31545	0.00768708	0.0168566
ENSMUSG00000010097	0	-0.0550179	7.37807	0.0629209	0.0939809
ENSMUSG00000041997	0	-0.342738	7.21044	0.000779645	0.00294089
ENSMUSG00000024006	0	-0.435447	6.99864	3.82995e-05	0.000426444
ENSMUSG00000024188	0	-0.00882031	7.44024	0.0348081	0.0575205
ENSMUSG00000038773	0	-0.235296	7.24844	0.0243663	0.0428995
ENSMUSG00000028480	0	0.160664	8.06407	7.51579e-05	0.000625727
ENSMUSG00000034317	0	-0.254292	7.2977	0.00437785	0.0108097
ENSMUSG00000025903	0	-0.317714	7.24267	0.00209912	0.00612004
ENSMUSG00000010755	0	-0.195396	6.98455	8.97323e-06	0.000207948
ENSMUSG00000052456	0	0.111351	7.37615	0.000935568	0.00336645
ENSMUSG00000020483	0	0.0648098	7.45202	0.136533	0.180536
ENSMUSG00000003119	0	-0.331577	7.21216	0.00144239	0.00461171
ENSMUSG00000078671	0	-0.0334489	7.26222	0.000502888	0.00215765
ENSMUSG00000042323	0	-0.120975	7.40177	0.419335	0.467666
ENSMUSG00000025351	0	0.40348	8.05492	1.68193e-05	0.000272009
ENSMUSG00000020900	0	0.229675	7.60805	0.00368555	0.00944235
ENSMUSG00000031578	0	0.0275539	7.51208	0.0452035	0.0712363
ENSMUSG00000022841	0	0.0747114	7.70221	0.000465051	0.00204652
ENSMUSG00000000134	0	-0.297506	7.26377	0.00899385	0.019076
ENSMUSG00000030421	0	-0.521544	7.04851	0.00510938	0.0121722
ENSMUSG00000026254	0	-0.168361	7.42225	0.014404	0.0279869
ENSMUSG00000038482	0	-0.245804	7.19524	0.00307228	0.00819266
ENSMUSG00000029415	0	-0.2036	7.06395	2.75723e-05	0.000357204
ENSMUSG00000027365	0	-0.224581	7.37558	0.0191561	0.0352773
ENSMUSG00000041415	0	-0.463305	7.13368	6.21236e-05	0.000562413
ENSMUSG00000004667	0	-0.153821	7.19699	0.00142375	0.00456875
ENSMUSG00000028896	0	-0.16499	7.24083	0.00979075	0.0204169
ENSMUSG00000004865	0	-0.0421931	7.26826	0.00017656	0.00106081
ENSMUSG00000021196	0	-0.659296	6.51549	0.000107386	0.0007853
ENSMUSG00000014769	0	-0.0420833	7.46616	0.162968	0.209637
ENSMUSG00000000088	0	-0.137646	7.38506	0.157968	0.204131
ENSMUSG00000028248	0	-0.473627	7.14935	0.000155866	0.000984355
ENSMUSG00000032267	0	-0.610294	6.47691	1.43524e-05	0.00025378
ENSMUSG00000027933	0	-0.0823237	7.19533	4.30126e-05	0.000456229
ENSMUSG00000022094	0	-0.93762	6.8588	1.58135e-05	0.000264655
ENSMUSG00000015697	0	0.0414628	7.31412	0.00225672	0.00645207
ENSMUSG00000042626	0	0.0450381	7.44687	0.249842	0.300426
ENSMUSG00000025246	0	-0.117095	7.30913	0.026615	0.0461005
ENSMUSG00000052707	0	-0.112972	7.42793	0.252245	0.302931
ENSMUSG00000008200	0	-0.304328	7.2376	0.0106308	0.0218347
ENSMUSG00000031762	0	-0.364662	7.26834	0.0715205	0.104695
ENSMUSG00000019916	0	0.327814	8.42786	4.69795e-06	0.000150513
ENSMUSG00000020362	0	-0.346787	7.46053	0.000533108	0.00224949
ENSMUSG00000043091	0	0.0381863	7.6451	0.0010866	0.00372775
ENSMUSG00000022024	0	-0.1919	7.25518	0.0059482	0.0137294
ENSMUSG00000026509	0	0.585002	7.9371	0.000275411	0.00143397
ENSMUSG00000004936	0	0.117726	7.47294	0.229578	0.280253
ENSMUSG00000043866	0	0.236911	7.77563	0.000166056	0.00102434
ENSMUSG00000031665	0	-0.84399	6.88143	1.81602e-05	0.000281916
ENSMUSG00000001025	0	0.350739	7.7164	0.00381747	0.0096887
ENSMUSG00000037503	0	-0.322764	7.3271	0.00350516	0.00907661
ENSMUSG00000025487	0	-0.0988625	7.40769	0.213078	0.263091
ENSMUSG00000001056	0	-0.155173	7.25028	0.0323334	0.0541463
ENSMUSG00000019373	0	-0.0129943	7.40246	0.647297	0.682462
ENSMUSG00000052798	0	-0.218071	7.34639	0.0166461	0.0314791
ENSMUSG00000047213	0	-0.122027	7.68372	0.000122375	0.000847091
ENSMUSG00000028964	0	-0.0888549	7.2103	0.00133536	0.00435859
ENSMUSG00000001674	0	-0.145929	7.15885	0.000393632	0.00183294
ENSMUSG00000028760	0	-0.201863	7.47454	0.00056112	0.00232873
ENSMUSG00000039844	0	0.1395	7.51505	0.184878	0.233207
ENSMUSG00000046865	0	-0.238129	7.19453	0.00153449	0.00483487
ENSMUSG00000022119	0	-0.323074	7.20503	0.0017526	0.00533535
ENSMUSG00000062997	0	-0.122914	7.34498	0.195192	0.244071
ENSMUSG00000027162	0	-0.199407	7.5344	0.000103758	0.000766174
ENSMUSG00000029062	0	-0.159929	7.38649	0.0224594	0.0400922
ENSMUSG00000003038	0	-0.115938	7.50233	0.00694313	0.0154977
ENSMUSG00000013593	0	-0.0810683	7.27919	0.00446745	0.0109753
ENSMUSG00000021395	0	-0.274801	7.15749	0.000408217	0.00187794
ENSMUSG00000020077	0	0.28475	8.14638	7.92911e-06	0.000198578
ENSMUSG00000040651	0	-0.243663	7.02623	6.78612e-06	0.000184775
ENSMUSG00000051316	0	0.00740967	7.66842	7.23776e-05	0.000613518
ENSMUSG00000097188	0	-0.152746	7.27292	0.0330853	0.055216
ENSMUSG00000006205	0	0.451911	7.62166	0.00149573	0.00474421
ENSMUSG00000062014	0	0.0592763	7.6325	0.00013301	0.000890224
ENSMUSG00000033166	0	-0.464476	7.08283	0.000429495	0.00194153
ENSMUSG00000027109	0	-0.176414	7.44029	0.00804034	0.0174602
ENSMUSG00000028902	0	-0.186667	7.20929	0.00213701	0.00620108
ENSMUSG00000001855	0	-0.59958	7.05349	1.16592e-05	0.000229597
ENSMUSG00000031976	0	-0.551001	6.95494	0.000178023	0.00106658
ENSMUSG00000030127	0	-0.0533215	7.39206	0.482422	0.527463
ENSMUSG00000028893	0	0.231515	7.59018	0.145026	0.190196
ENSMUSG00000021748	0	-0.311657	7.16998	0.00197503	0.00584151
ENSMUSG00000034168	0	-0.240564	6.90793	0.000168431	0.00103177
ENSMUSG00000038975	0	-0.519332	7.23736	8.55077e-05	0.00068065
ENSMUSG00000027810	0	-0.225701	7.16801	0.00186899	0.00559498
ENSMUSG00000032624	0	-0.247563	7.04015	2.98009e-05	0.000370872
ENSMUSG00000037474	0	-0.294062	7.27561	0.0086626	0.0185075
ENSMUSG00000093516	0	-0.24507	6.89027	0.000571054	0.00235418
ENSMUSG00000021996	0	0.335822	7.60058	0.00751962	0.016529
ENSMUSG00000005871	0	-0.0696824	7.33766	0.0422289	0.0674495
ENSMUSG00000000486	0	-0.191623	6.71799	0.00269364	0.00739765
ENSMUSG00000020705	0	-0.129637	7.36096	0.159592	0.205939
ENSMUSG00000049422	0	-0.488727	6.25378	2.64305e-05	0.000347957
ENSMUSG00000025968	0	-0.079204	7.3353	0.211797	0.261732
ENSMUSG00000000838	0	-0.282489	7.23697	0.0104764	0.021562
ENSMUSG00000041763	0	0.0420385	7.41863	0.562721	0.603798
ENSMUSG00000028273	0	0.309712	7.69791	0.00463483	0.0112817
ENSMUSG00000018433	0	-0.16516	7.21715	0.008104	0.0175481
ENSMUSG00000040488	0	-0.377323	6.648	9.51402e-05	0.000726914
ENSMUSG00000021039	0	-0.0607536	7.24599	0.00113759	0.00386584
ENSMUSG00000007080	0	-0.486612	6.97531	6.71853e-05	0.000587664
ENSMUSG00000044627	0	-0.106099	7.33385	0.28402	0.335366
ENSMUSG00000014859	0	-0.193526	7.11534	0.000403392	0.00186525
ENSMUSG00000016534	0	0.447176	7.69854	0.0101458	0.0210175
ENSMUSG00000028729	0	-0.237263	7.08969	0.0004783	0.00208725
ENSMUSG00000017776	0	0.176818	7.71314	0.00055824	0.00231938
ENSMUSG00000042712	0	-0.0749616	7.79313	5.21911e-06	0.00015755
ENSMUSG00000027395	0	-0.530599	6.84635	0.00109854	0.00375933
ENSMUSG00000020321	0	-0.159063	7.25438	0.0169071	0.0318958
ENSMUSG00000048000	0	-0.206371	7.25947	0.0241147	0.0425214
ENSMUSG00000043733	0	0.328349	7.90647	4.34314e-05	0.000459348
ENSMUSG00000029455	0	-0.00583877	7.01054	0.000239081	0.00130202
ENSMUSG00000022247	0	-0.187378	7.29034	0.0724682	0.105861
ENSMUSG00000024521	0	0.269089	7.82791	4.20376e-06	0.000144628
ENSMUSG00000034187	0	0.0391037	7.36281	0.144813	0.189951
ENSMUSG00000033184	0	-0.012802	7.6903	3.88195e-05	0.000428322
ENSMUSG00000029616	0	0.0330449	7.77802	4.58337e-05	0.00047246
ENSMUSG00000006307	0	-0.192665	7.15795	0.00086903	0.00318446
ENSMUSG00000019947	0	-0.476089	6.98907	1.94909e-05	0.000291475
ENSMUSG00000032487	0	0.503845	7.47035	0.0252936	0.0442361
ENSMUSG00000031652	0	-0.220381	7.02486	9.99967e-06	0.000217589
ENSMUSG00000048758	0	0.385638	7.43417	0.00827673	0.0178342
ENSMUSG00000016619	0	-0.135294	7.46087	0.00103232	0.00359952
ENSMUSG00000033257	0	-0.12897	7.17035	0.000351187	0.00169612
ENSMUSG00000005899	0	-0.0132309	7.22909	0.00113679	0.00386489
ENSMUSG00000026349	0	-0.362	7.14179	0.000479248	0.00209039
ENSMUSG00000039395	0	0.122811	7.17819	0.000103581	0.000765643
ENSMUSG00000030168	0	-0.674353	6.77167	3.22277e-06	0.000128361
ENSMUSG00000020097	0	0.26281	7.50305	0.0225283	0.0401988
ENSMUSG00000064145	0	-0.124935	7.35974	0.0806708	0.115773
ENSMUSG00000024271	0	-0.0267605	7.22346	0.00130443	0.00428932
ENSMUSG00000020741	0	-0.00494323	7.1347	0.000138448	0.000912972
ENSMUSG00000028136	0	-0.100727	7.2797	0.160667	0.207046
ENSMUSG00000027203	0	-0.258761	7.2679	0.0160009	0.0305008
ENSMUSG00000031555	0	0.457351	7.56508	0.0144547	0.0280679
ENSMUSG00000023972	0	0.210672	7.43376	0.0667994	0.0988656
ENSMUSG00000027108	0	-0.200839	7.24388	0.055776	0.0849511
ENSMUSG00000030447	0	0.0751447	7.62845	7.81314e-05	0.000642199
ENSMUSG00000028954	0	-0.0271623	7.30897	0.270496	0.321716
ENSMUSG00000024695	0	-0.187281	7.35894	0.00626883	0.0143084
ENSMUSG00000029063	0	0.0281265	7.38245	0.727878	0.756345
ENSMUSG00000027829	0	-0.365777	7.30392	7.36948e-05	0.000618236
ENSMUSG00000002524	0	-0.384058	7.19325	0.000709388	0.00274669
ENSMUSG00000021678	0	-0.419837	6.99972	9.46619e-05	0.000725874
ENSMUSG00000043909	0	-0.587906	6.87138	3.35216e-06	0.000129881
ENSMUSG00000025190	0	-0.0991817	7.09206	0.000726047	0.00279345
ENSMUSG00000024501	0	0.388781	7.30819	0.00194471	0.00577128
ENSMUSG00000069744	0	-0.0657223	7.36349	0.236029	0.286673
ENSMUSG00000035242	0	-0.00942002	7.36761	0.679252	0.711919
ENSMUSG00000059248	0	-0.0236723	7.22446	0.0253837	0.0443634
ENSMUSG00000025630	0	-0.0560587	7.3103	0.223686	0.274032
ENSMUSG00000061589	0	-0.204071	7.34623	0.0047766	0.011536
ENSMUSG00000025024	0	-0.170972	7.31879	0.0311381	0.052465
ENSMUSG00000071655	0	-0.0568886	7.30647	0.503541	0.547425
ENSMUSG00000026484	0	-0.23634	7.34212	0.00347378	0.00901342
ENSMUSG00000001918	0	-0.382684	6.68816	8.30565e-07	7.64944e-05
ENSMUSG00000063884	0	0.0759543	7.24132	0.00156045	0.00489083
ENSMUSG00000026374	0	-0.346208	7.15047	0.00106992	0.003689
ENSMUSG00000041313	0	-0.121098	7.8475	2.72109e-05	0.000354404
ENSMUSG00000030704	0	-0.0278165	7.49455	0.00256974	0.00713777
ENSMUSG00000060992	0	-0.0180737	7.41655	0.0722526	0.105577
ENSMUSG00000054753	0	-0.239119	6.88342	0.00449386	0.0110242
ENSMUSG00000021556	0	-0.0144761	7.17766	0.000524633	0.00222345
ENSMUSG00000041769	0	-0.386592	7.0413	0.000200526	0.00115535
ENSMUSG00000017760	0	0.178373	7.7102	0.000181076	0.00107837
ENSMUSG00000039515	0	0.00688868	7.23644	0.00451762	0.0110602
ENSMUSG00000029422	0	-0.0748186	7.27034	0.0350345	0.0578193
ENSMUSG00000097799	0	-0.15645	6.87889	4.77727e-05	0.000482941
ENSMUSG00000021279	0	0.0983705	7.58767	0.000984964	0.00348871
ENSMUSG00000017146	0	-0.529328	6.91365	1.0566e-05	0.000221281
ENSMUSG00000034525	0	-0.136414	7.18982	0.0132499	0.0261283
ENSMUSG00000003873	0	-0.000967525	7.26558	0.0797399	0.114639
ENSMUSG00000020739	0	-0.229859	7.2355	0.0220425	0.0394861
ENSMUSG00000047407	0	-0.287665	7.06179	0.00228132	0.00651108
ENSMUSG00000024231	0	-0.102288	7.12061	0.00131799	0.00431796
ENSMUSG00000026037	0	-0.199088	7.20469	0.118567	0.15995
ENSMUSG00000037197	0	-0.010569	7.32675	0.554488	0.596012
ENSMUSG00000024968	0	-0.635518	6.66709	0.0051693	0.0122911
ENSMUSG00000040857	0	0.611825	7.51363	1.34127e-05	0.000245324
ENSMUSG00000045394	0	-0.320593	7.14883	0.0268324	0.0464037
ENSMUSG00000030451	0	-0.228308	6.96346	3.6432e-05	0.00041425
ENSMUSG00000066979	0	-0.269489	7.23102	0.00370302	0.00947605
ENSMUSG00000001403	0	-0.153084	7.2665	0.159679	0.206039
ENSMUSG00000025266	0	-0.350662	6.95665	0.000159394	0.00100118
ENSMUSG00000060475	0	-0.37094	7.03958	0.000261422	0.00138112
ENSMUSG00000020457	0	0.036249	7.38238	0.0543609	0.083142
ENSMUSG00000032279	0	-0.102871	7.19536	0.0174529	0.0327034
ENSMUSG00000003731	0	-0.024002	7.38613	0.0353557	0.0582563
ENSMUSG00000023015	0	-0.19083	7.3195	0.0112909	0.0229669
ENSMUSG00000022114	0	-0.143807	6.89892	4.28982e-05	0.00045578
ENSMUSG00000027881	0	-0.378852	7.11358	0.000685849	0.00268109
ENSMUSG00000050071	0	-0.543629	7.21683	0.000266446	0.00139957
ENSMUSG00000000171	0	-0.0414001	7.30241	0.923961	0.932544
ENSMUSG00000026174	0	-0.140581	7.28537	0.1242	0.166491
ENSMUSG00000035575	0	-0.332461	7.04526	0.00925443	0.0195024
ENSMUSG00000033952	0	-0.276024	7.00486	3.63822e-05	0.00041425
ENSMUSG00000051853	0	0.153152	7.57983	0.000341527	0.0016693
ENSMUSG00000030826	0	-0.56376	6.79629	0.00122458	0.0040787
ENSMUSG00000039852	0	-0.290138	7.23598	0.00741133	0.0163377
ENSMUSG00000027770	0	-0.0677395	7.23697	0.0531093	0.0815403
ENSMUSG00000037400	0	-0.667366	6.74182	7.85598e-06	0.000197262
ENSMUSG00000046691	0	0.0634103	7.38377	0.332148	0.383992
ENSMUSG00000094410	0	-0.339902	6.96386	0.000654476	0.00259028
ENSMUSG00000002222	0	-0.33343	6.88235	6.75234e-06	0.000184083
ENSMUSG00000004040	0	-0.0623528	7.64895	1.68932e-05	0.00027283
ENSMUSG00000042410	0	0.000170505	7.44509	0.00470149	0.0114022
ENSMUSG00000017291	0	-0.00236941	7.36726	0.20959	0.259428
ENSMUSG00000021248	0	0.231458	7.72628	0.000130371	0.000878549
ENSMUSG00000090733	0	-0.0896498	7.23446	0.244631	0.295107
ENSMUSG00000031586	0	-0.510086	7.28547	0.000228373	0.00126339
ENSMUSG00000038214	0	-0.753494	6.5359	6.18837e-06	0.000175692
ENSMUSG00000000184	0	0.470433	7.89345	0.00015258	0.000970839
ENSMUSG00000033845	0	-0.18705	6.98149	0.000989443	0.00349966
ENSMUSG00000036606	0	0.413452	8.03865	1.725e-05	0.000275187
ENSMUSG00000024754	0	-0.532314	6.44552	4.77534e-08	3.49554e-05
ENSMUSG00000029152	0	0.158598	7.51005	0.00384648	0.00974429
ENSMUSG00000030870	0	-0.0333335	7.15362	0.000827269	0.00306676
ENSMUSG00000002006	0	-0.84702	5.93797	9.42467e-06	0.000212355
ENSMUSG00000004100	0	-0.309552	6.97978	0.00252768	0.0070504
ENSMUSG00000097057	0	0.0117208	7.24666	0.0809554	0.116106
ENSMUSG00000037475	0	-0.161783	7.24226	0.128622	0.171553
ENSMUSG00000044147	0	-0.220404	7.37315	0.000122678	0.000848065
ENSMUSG00000020088	0	0.185369	7.61779	0.000464414	0.00204438
ENSMUSG00000022557	0	-0.188924	7.06427	0.00502618	0.0120118
ENSMUSG00000027496	0	0.0335963	7.32478	0.142634	0.187485
ENSMUSG00000022201	0	-0.0856585	7.30728	0.0770787	0.111449
ENSMUSG00000059743	0	-0.202024	6.84769	8.92599e-06	0.000207948
ENSMUSG00000006599	0	-0.0318684	7.30566	0.441712	0.488846
ENSMUSG00000030122	0	-0.205399	7.22531	0.0098573	0.0205362
ENSMUSG00000031565	0	0.408344	7.03515	8.75942e-06	0.00020665
ENSMUSG00000010517	0	-0.155775	7.16954	0.0415133	0.0665389
ENSMUSG00000020167	0	-0.280747	6.89835	6.62141e-05	0.000584396
ENSMUSG00000039000	0	-0.110828	7.1739	0.0406083	0.0653269
ENSMUSG00000034032	0	-0.548679	6.7306	1.46877e-05	0.000255214
ENSMUSG00000020130	0	-0.229803	7.06513	0.000833315	0.00308553
ENSMUSG00000063904	0	-0.168741	7.12422	0.00445751	0.0109558
ENSMUSG00000032477	0	-0.25369	7.18323	0.0300454	0.0509683
ENSMUSG00000031765	0	-0.347544	7.17597	0.0564961	0.0858452
ENSMUSG00000022108	0	0.466545	7.7945	2.13267e-05	0.000307715
ENSMUSG00000005892	0	-1.15994	5.29052	6.58251e-06	0.000182169
ENSMUSG00000053841	0	-0.0563475	7.2288	0.15896	0.205207
ENSMUSG00000042650	0	-0.134275	7.22888	0.162272	0.208845
ENSMUSG00000036707	0	-0.0129318	7.35873	0.0270719	0.0467112
ENSMUSG00000040943	0	-0.382758	6.4792	0.000137707	0.000909913
ENSMUSG00000035828	0	-0.435986	6.76468	0.00010204	0.000759109
ENSMUSG00000048170	0	-0.223825	7.1548	0.0179516	0.033435
ENSMUSG00000021266	0	0.0902569	7.80741	9.50491e-05	0.00072673
ENSMUSG00000020064	0	-0.800766	6.80468	0.000129134	0.000874246
ENSMUSG00000053560	0	-0.245543	7.20099	0.0873554	0.123892
ENSMUSG00000038467	0	0.165416	7.60401	0.000153643	0.000975367
ENSMUSG00000034543	0	-0.0423527	7.16567	0.00981802	0.0204641
ENSMUSG00000020766	0	-0.165182	7.33861	0.00642506	0.0145907
ENSMUSG00000020496	0	-0.227227	7.12126	0.0309171	0.0521888
ENSMUSG00000068749	0	-0.128962	7.17847	0.117416	0.15869
ENSMUSG00000067367	0	-0.351095	6.85297	0.00059052	0.00240794
ENSMUSG00000041075	0	-0.332903	6.90429	3.73597e-05	0.000419388
ENSMUSG00000016256	0	0.334491	7.62513	6.59139e-05	0.000583049
ENSMUSG00000020790	0	0.176875	7.55805	0.0019236	0.00572411
ENSMUSG00000040785	0	-0.0234671	7.06619	6.83227e-05	0.000593825
ENSMUSG00000030697	0	-0.0977716	7.15365	0.0486845	0.0757537
ENSMUSG00000019428	0	0.00547847	7.2936	0.591546	0.631011
ENSMUSG00000027787	0	-0.151324	7.29858	0.00510244	0.0121583
ENSMUSG00000043131	0	0.194437	7.4709	0.0287581	0.0491106
ENSMUSG00000029203	0	-0.249985	7.20801	0.00503333	0.0120276
ENSMUSG00000030342	0	-0.0536406	7.80515	2.6016e-05	0.000344096
ENSMUSG00000028618	0	0.375582	7.76273	4.03322e-05	0.000439271
ENSMUSG00000042502	0	-0.0993076	7.14816	0.0301738	0.0511624
ENSMUSG00000031529	0	0.0193783	7.50876	0.00113632	0.00386393
ENSMUSG00000032253	0	-0.487775	6.62537	4.28164e-05	0.00045578
ENSMUSG00000050017	0	-0.0415475	7.26465	0.629512	0.666214
ENSMUSG00000015880	0	-0.297862	7.09677	0.00440712	0.0108636
ENSMUSG00000026565	0	-0.588735	6.75833	3.77679e-05	0.00042267
ENSMUSG00000007041	0	0.5163	7.80917	0.00021789	0.00122328
ENSMUSG00000040565	0	-0.187124	7.26964	0.0056765	0.0132149
ENSMUSG00000020918	0	-0.403393	6.81732	0.000142198	0.000928594
ENSMUSG00000003360	0	-0.12068	7.1611	0.0994595	0.138244
ENSMUSG00000027351	0	-0.380698	6.92069	0.0270105	0.0466382
ENSMUSG00000035478	0	-0.132534	7.1557	0.174771	0.22231
ENSMUSG00000033031	0	-0.398588	7.10385	0.00117535	0.00396156
ENSMUSG00000033581	0	-0.415632	7.10745	0.00162015	0.00503194
ENSMUSG00000063550	0	-0.161703	7.18518	0.185998	0.234418
ENSMUSG00000026281	0	-0.0712496	7.12798	0.00847195	0.0181728
ENSMUSG00000018076	0	-0.163299	7.00909	0.000166012	0.00102434
ENSMUSG00000029701	0	-0.163026	7.16036	0.089012	0.125924
ENSMUSG00000078429	0	0.125249	7.33984	0.603439	0.642104
ENSMUSG00000079523	0	-0.0691039	7.34394	0.00169725	0.0052124
ENSMUSG00000038056	0	-0.378904	7.2671	0.00258201	0.00716099
ENSMUSG00000021012	0	-0.0719027	7.41333	0.000370518	0.00175624
ENSMUSG00000030867	0	-0.271168	6.99291	0.00300517	0.00805661
ENSMUSG00000058230	0	0.184773	7.29665	0.0281923	0.0483168
ENSMUSG00000021737	0	-0.0974634	7.30204	0.00448994	0.0110162
ENSMUSG00000025068	0	0.458383	7.4157	0.00256136	0.0071172
ENSMUSG00000027012	0	0.0823981	7.38849	0.0352787	0.0581469
ENSMUSG00000029814	0	-0.183753	6.98026	0.000111079	0.0008
ENSMUSG00000049354	0	-0.0393164	7.18967	0.114508	0.155384
ENSMUSG00000004929	0	-0.130781	7.03378	0.00605985	0.0139183
ENSMUSG00000014496	0	-0.337733	7.0929	0.00120724	0.00403628
ENSMUSG00000008373	0	-0.344628	6.9769	0.00373114	0.00952911
ENSMUSG00000031119	0	0.0827067	7.64852	8.85189e-07	7.77055e-05
ENSMUSG00000028811	0	-0.303435	6.92155	4.9078e-05	0.00049271
ENSMUSG00000031314	0	-0.287997	7.02816	0.00761816	0.0167222
ENSMUSG00000003072	0	0.0436475	7.4029	0.00137526	0.00444957
ENSMUSG00000046718	0	0.183523	6.19413	1.45181e-09	8.10968e-06
ENSMUSG00000038965	0	0.0711896	7.33989	0.0453847	0.0714602
ENSMUSG00000024121	0	-0.203946	7.32287	0.000465542	0.00204704
ENSMUSG00000033237	0	-0.501613	6.93082	8.3063e-05	0.000667485
ENSMUSG00000060591	0	-0.28864	6.58264	3.04003e-05	0.000375234
ENSMUSG00000038633	0	0.198684	7.49828	0.000680315	0.00266611
ENSMUSG00000039671	0	-0.129511	7.09274	0.028261	0.048409
ENSMUSG00000033285	0	-0.292425	6.99886	0.00355641	0.00919196
ENSMUSG00000027613	0	0.0135467	7.39994	0.000731049	0.00280531
ENSMUSG00000020721	0	-0.353554	6.92801	0.000106492	0.000781248
ENSMUSG00000018428	0	-0.206717	7.01109	0.00259405	0.0071862
ENSMUSG00000029713	0	0.169055	7.52655	0.000944562	0.00339153
ENSMUSG00000022914	0	-0.306085	6.93775	0.00015181	0.000968496
ENSMUSG00000021484	0	0.205335	7.58711	0.000417938	0.00190596
ENSMUSG00000051510	0	-0.0424187	7.17938	0.703138	0.733241
ENSMUSG00000021273	0	-0.237554	6.99136	0.000895484	0.00325855
ENSMUSG00000024483	0	-0.283043	7.00428	0.000980195	0.00347911
ENSMUSG00000036693	0	-0.180557	7.10286	0.0839555	0.119765
ENSMUSG00000015605	0	-0.471489	7.07504	0.000950913	0.00340714
ENSMUSG00000026159	0	-0.384894	7.23852	1.34225e-05	0.000245324
ENSMUSG00000019173	0	0.102012	7.38131	0.0044014	0.0108556
ENSMUSG00000045411	0	-0.268727	6.87663	0.000223588	0.00124382
ENSMUSG00000002028	0	-0.230994	7.01962	0.00783028	0.0170971
ENSMUSG00000031432	0	-0.321547	6.63259	1.38863e-05	0.000249589
ENSMUSG00000055839	0	0.00117359	7.29891	0.0702362	0.10309
ENSMUSG00000025265	0	-0.50922	6.23146	1.91021e-05	0.000288214
ENSMUSG00000023067	0	0.694778	8.04106	2.17066e-07	5.23488e-05
ENSMUSG00000022956	0	-0.0613182	7.15887	0.26426	0.315342
ENSMUSG00000006169	0	0.0794914	7.37465	0.0063174	0.0143954
ENSMUSG00000017478	0	-0.166904	7.16864	0.0549798	0.0839014
ENSMUSG00000056579	0	-0.16745	7.22077	0.0553179	0.0843353
ENSMUSG00000079184	0	-0.171034	6.93711	0.000635544	0.00253917
ENSMUSG00000052296	0	-0.108588	7.23423	0.0450492	0.0710237
ENSMUSG00000060743	0	-0.139915	7.0663	0.00708095	0.0157557
ENSMUSG00000019804	0	0.11571	7.47701	0.000655028	0.00259197
ENSMUSG00000035621	0	0.0617382	7.36988	0.0225021	0.0401619
ENSMUSG00000060206	0	-0.315193	6.81246	2.62448e-05	0.00034676
ENSMUSG00000008690	0	0.0611499	7.41375	0.00203406	0.00597105
ENSMUSG00000000384	0	-0.0918714	7.13471	0.238788	0.289336
ENSMUSG00000022770	0	-0.0585276	7.32323	0.000814762	0.00303679
ENSMUSG00000035632	0	-0.126018	7.03047	0.00789405	0.017216
ENSMUSG00000022855	0	-0.0833735	7.18471	0.427354	0.475516
ENSMUSG00000020608	0	-0.168468	7.14631	0.098097	0.136662
ENSMUSG00000028397	0	-0.561505	6.67346	1.69032e-05	0.00027283
ENSMUSG00000036781	0	0.0118276	7.40055	0.000167861	0.00103046
ENSMUSG00000009741	0	-0.195786	7.20801	0.00304785	0.0081412
ENSMUSG00000029763	0	0.194437	7.50986	6.67153e-05	0.000585888
ENSMUSG00000026202	0	-0.266356	6.72782	4.02102e-05	0.000438595
ENSMUSG00000025410	0	0.148568	7.41887	0.00261211	0.0072274
ENSMUSG00000014959	0	-0.1371	7.52728	1.11403e-05	0.000224646
ENSMUSG00000022031	0	-0.112488	6.95176	0.000805049	0.00300674
ENSMUSG00000022034	0	-0.0672626	7.05701	0.00220042	0.00633386
ENSMUSG00000024014	0	-0.101245	6.61958	1.65779e-05	0.000269695
ENSMUSG00000030061	0	-0.0945567	7.21015	0.155338	0.201242
ENSMUSG00000029177	0	-0.122527	7.05189	0.0175522	0.03285
ENSMUSG00000026103	0	-0.0645977	7.34711	0.0121517	0.0243675
ENSMUSG00000002455	0	0.0141896	7.1831	0.570725	0.6114
ENSMUSG00000028869	0	-0.133963	7.14308	0.194503	0.243403
ENSMUSG00000030298	0	0.0669002	7.42659	0.000460338	0.00203312
ENSMUSG00000047534	0	-0.394472	6.81421	0.000277812	0.00144305
ENSMUSG00000033799	0	-0.380088	7.12979	0.000118172	0.000829546
ENSMUSG00000032397	0	-0.232086	7.01437	0.017723	0.0330964
ENSMUSG00000073639	0	0.230507	7.57631	6.0198e-05	0.000552071
ENSMUSG00000020267	0	-0.15001	7.26542	0.00162949	0.00505168
ENSMUSG00000067194	0	-0.224898	7.01451	0.0145858	0.02827
ENSMUSG00000020671	0	0.124177	7.41722	0.00264049	0.00728646
ENSMUSG00000030672	0	-0.355271	6.69399	0.0153549	0.0294639
ENSMUSG00000021096	0	-0.209247	7.20273	0.00207343	0.00606391
ENSMUSG00000027893	0	0.0491035	7.25339	0.442181	0.489266
ENSMUSG00000025862	0	-0.129501	7.16918	0.137765	0.181929
ENSMUSG00000024571	0	0.0115489	7.34836	0.00092772	0.00334369
ENSMUSG00000034518	0	-0.28533	6.86088	0.00191023	0.00569514
ENSMUSG00000029050	0	-0.0544396	7.25267	0.0364357	0.0597042
ENSMUSG00000020328	0	0.0267678	7.18547	0.0895603	0.126602
ENSMUSG00000054611	0	-0.148854	7.10236	0.0505667	0.0782608
ENSMUSG00000022814	0	-0.202189	7.00297	0.00584842	0.0135504
ENSMUSG00000037622	0	-0.1141	7.14494	0.108682	0.148941
ENSMUSG00000049164	0	-0.361971	6.81898	0.011098	0.0226248
ENSMUSG00000059263	0	0.363081	7.65045	9.62502e-05	0.000733516
ENSMUSG00000027597	0	-0.244498	6.83121	8.44475e-05	0.000675188
ENSMUSG00000022451	0	-0.0253556	7.29885	0.00360179	0.00927756
ENSMUSG00000069565	0	-0.454674	6.88756	0.000156328	0.00098642
ENSMUSG00000023068	0	-0.0418617	7.32151	0.00159593	0.00497576
ENSMUSG00000027006	0	0.234549	7.81186	1.34538e-05	0.000245424
ENSMUSG00000022702	0	-0.0934483	7.07379	0.0289649	0.0494103
ENSMUSG00000030967	0	-0.257723	6.98531	0.00714592	0.0158697
ENSMUSG00000056758	0	0.655024	7.54833	0.0113768	0.0231074
ENSMUSG00000003345	0	0.0217758	7.12585	0.0563905	0.0857264
ENSMUSG00000040268	0	-0.59801	6.69675	1.80291e-05	0.000281267
ENSMUSG00000060147	0	0.253395	7.67968	8.30138e-06	0.000203277
ENSMUSG00000039768	0	0.0820095	7.3269	0.00481372	0.0116128
ENSMUSG00000024758	0	-0.00751495	7.29561	0.00732121	0.0161771
ENSMUSG00000076441	0	0.240884	7.23227	0.139432	0.183827
ENSMUSG00000032309	0	-0.426497	6.76982	0.000446673	0.00199444
ENSMUSG00000021326	0	-0.0888238	7.07122	0.0869577	0.123399
ENSMUSG00000034424	0	-0.0190806	7.33359	0.00025454	0.00135684
ENSMUSG00000038683	0	-0.0446698	7.15109	0.855095	0.871334
ENSMUSG00000042439	0	-0.156149	6.8634	0.00232418	0.00660057
ENSMUSG00000020687	0	-0.321692	7.14157	0.000546	0.00228905
ENSMUSG00000038418	0	-0.876059	7.34918	1.8846e-06	0.00010317
ENSMUSG00000021244	0	-0.345505	6.86576	8.21562e-05	0.000662561
ENSMUSG00000024400	0	-0.105029	7.00452	0.0015853	0.00495105
ENSMUSG00000018412	0	-0.127701	7.15632	0.0489212	0.076052
ENSMUSG00000034252	0	-0.142765	7.25789	0.000359869	0.00172401
ENSMUSG00000027187	0	-0.0150689	7.42007	0.00269948	0.0074083
ENSMUSG00000031939	0	-0.26966	7.02138	0.0398461	0.0643129
ENSMUSG00000044224	0	-0.72344	6.62877	0.000358638	0.00172039
ENSMUSG00000035754	0	0.0237649	7.01511	0.00135963	0.00441135
ENSMUSG00000020124	0	-0.0898677	7.08309	0.166908	0.214008
ENSMUSG00000026878	0	0.158544	7.50885	0.000168703	0.00103216
ENSMUSG00000034243	0	0.0695523	7.23518	0.349248	0.400784
ENSMUSG00000031548	0	-0.515136	6.28565	1.59403e-06	9.42929e-05
ENSMUSG00000042590	0	-0.148868	6.84501	0.000534846	0.00225438
ENSMUSG00000029131	0	-0.145353	7.07163	0.103872	0.143387
ENSMUSG00000024054	0	-0.242494	7.04244	0.00323416	0.00852575
ENSMUSG00000053398	0	-0.274762	6.69403	9.57e-06	0.000213655
ENSMUSG00000024491	0	-0.0771591	6.9423	0.000352204	0.00169879
ENSMUSG00000063334	0	-0.173667	7.29272	7.61396e-05	0.000631504
ENSMUSG00000006373	0	0.167606	7.44741	0.000458879	0.00203035
ENSMUSG00000029622	0	0.313285	7.36851	0.0016676	0.0051451
ENSMUSG00000020078	0	-0.012049	7.25306	0.0502138	0.0777858
ENSMUSG00000030180	0	-0.112759	7.2216	0.00307598	0.00819936
ENSMUSG00000049932	0	-0.665715	7.00067	1.02079e-05	0.000218596
ENSMUSG00000027509	0	-0.0399405	7.0684	0.0447151	0.0706034
ENSMUSG00000022200	0	-0.045624	7.34342	0.00128919	0.00425134
ENSMUSG00000052512	0	-0.866761	6.2553	0.000484308	0.00210568
ENSMUSG00000027201	0	-0.347947	7.16734	0.000370012	0.00175511
ENSMUSG00000035545	0	-0.0907761	7.03602	0.386517	0.436253
ENSMUSG00000063015	0	-0.290182	6.925	0.00117381	0.00395888
ENSMUSG00000035597	0	-0.118861	7.11057	0.162974	0.209637
ENSMUSG00000037486	0	-0.528172	6.69694	2.54293e-05	0.000338841
ENSMUSG00000029068	0	-0.142039	7.12007	0.0180188	0.0335289
ENSMUSG00000004789	0	0.117225	7.37984	0.00258556	0.00716992
ENSMUSG00000029475	0	-0.269222	6.5691	4.38132e-07	6.31798e-05
ENSMUSG00000022351	0	0.0318511	6.90938	0.000272697	0.00142321
ENSMUSG00000009535	0	-0.128245	6.95669	0.00258798	0.00717482
ENSMUSG00000055653	0	-0.270615	7.31752	0.000415696	0.00189941
ENSMUSG00000016382	0	0.501882	7.58232	0.000364731	0.00173819
ENSMUSG00000005609	0	0.188722	7.14891	0.00127259	0.00421265
ENSMUSG00000039703	0	0.117943	7.38561	0.00043318	0.00195166
ENSMUSG00000004268	0	-0.184393	6.92622	0.00758881	0.0166661
ENSMUSG00000058569	0	0.235164	7.61297	0.000156293	0.00098642
ENSMUSG00000023050	0	-0.0859009	7.07172	0.384604	0.434541
ENSMUSG00000040028	0	-0.237478	7.08132	0.00967096	0.0202214
ENSMUSG00000097660	0	-0.283521	6.8507	0.000491949	0.0021242
ENSMUSG00000005667	0	-0.363464	6.50161	2.1651e-07	5.23488e-05
ENSMUSG00000039220	0	0.410212	7.60228	4.85741e-06	0.000152722
ENSMUSG00000027195	0	0.346418	7.38313	0.00160252	0.00498849
ENSMUSG00000020840	0	-0.156004	7.0021	0.0300821	0.0510267
ENSMUSG00000027714	0	-0.196691	7.04895	0.0366206	0.059949
ENSMUSG00000029478	0	0.043574	7.08315	0.0429631	0.0683634
ENSMUSG00000021127	0	-0.301765	6.83449	0.00146109	0.00465659
ENSMUSG00000024474	0	-0.0235014	7.09985	0.34544	0.397182
ENSMUSG00000040296	0	-0.0538416	6.46085	1.2023e-05	0.000233295
ENSMUSG00000041219	0	-0.239618	6.99639	0.0145617	0.0282356
ENSMUSG00000006678	0	-0.731185	6.48806	5.8623e-05	0.000543761
ENSMUSG00000021756	0	-0.261314	7.16672	0.00148521	0.00471821
ENSMUSG00000037544	0	-0.116624	7.19148	0.00178539	0.0054119
ENSMUSG00000013662	0	-0.290732	7.06268	0.00370725	0.00948466
ENSMUSG00000001288	0	0.0808745	6.61918	0.000424348	0.00192479
ENSMUSG00000020534	0	-0.305739	6.83344	0.000719024	0.00277372
ENSMUSG00000015937	0	-0.0933754	6.83637	9.16474e-06	0.000210166
ENSMUSG00000001627	0	0.112443	7.59835	1.07451e-06	8.11816e-05
ENSMUSG00000038503	0	0.101	7.31503	0.00420148	0.0104686
ENSMUSG00000028884	0	-0.209063	6.85876	0.00570863	0.013277
ENSMUSG00000039068	0	-0.0633997	7.14402	0.274372	0.32562
ENSMUSG00000048271	0	-0.0789409	7.11122	0.593995	0.633206
ENSMUSG00000001785	0	-0.0860091	7.04354	0.102688	0.141986
ENSMUSG00000023988	0	0.000170842	7.14429	0.930593	0.938419
ENSMUSG00000053293	0	-0.169166	7.29415	0.00113892	0.00386857
ENSMUSG00000026879	0	0.836782	8.13514	9.12584e-08	4.03316e-05
ENSMUSG00000020737	0	0.0378751	7.05381	0.0124043	0.0247611
ENSMUSG00000023036	0	0.455471	7.47413	0.00123692	0.00411169
ENSMUSG00000037513	0	0.0956414	7.30287	0.00818067	0.0176635
ENSMUSG00000005973	0	0.152822	7.59109	1.00688e-05	0.000217714
ENSMUSG00000026604	0	0.324741	7.72945	6.9131e-05	0.000596545
ENSMUSG00000038845	0	-0.310689	6.7508	0.000213467	0.00120652
ENSMUSG00000002833	0	-0.0366299	6.98912	0.00609848	0.0139895
ENSMUSG00000066037	0	-0.221098	6.99905	0.045208	0.0712382
ENSMUSG00000029313	0	-0.178702	7.4212	1.22565e-06	8.46517e-05
ENSMUSG00000024104	0	-0.0714188	7.20238	0.00406215	0.0101799
ENSMUSG00000002741	0	0.131133	7.32841	0.00208375	0.00608679
ENSMUSG00000025223	0	-0.152763	6.94941	0.00377197	0.00959873
ENSMUSG00000061479	0	-0.179068	6.90414	0.00254581	0.00708386
ENSMUSG00000000365	0	-0.21902	6.52486	0.00293704	0.00791942
ENSMUSG00000046201	0	-0.251029	7.07391	0.00244505	0.00686879
ENSMUSG00000002477	0	-0.191896	7.0319	0.0402662	0.0648622
ENSMUSG00000036817	0	-0.235956	6.76756	9.32997e-06	0.000211613
ENSMUSG00000070493	0	-0.00884426	7.17692	0.0904568	0.127647
ENSMUSG00000025366	0	0.280186	7.37616	0.00726144	0.0160742
ENSMUSG00000054079	0	-0.312028	6.90189	0.00623598	0.0142498
ENSMUSG00000018974	0	-0.325508	6.87189	0.00202747	0.00595726
ENSMUSG00000053094	0	-0.216633	7.30354	9.49247e-05	0.00072673
ENSMUSG00000050240	0	-0.321773	6.84026	0.000652447	0.00258526
ENSMUSG00000025156	0	0.0135036	7.10067	0.740373	0.767656
ENSMUSG00000032254	0	-0.142222	7.26217	0.000388201	0.00181613
ENSMUSG00000045005	0	-0.449947	6.33266	7.71235e-05	0.000637688
ENSMUSG00000019849	0	-0.192898	7.0323	0.111033	0.151642
ENSMUSG00000007812	0	-0.203333	7.0816	0.0212234	0.0382554
ENSMUSG00000044221	0	-0.167628	7.2225	0.00090638	0.00328621
ENSMUSG00000087400	0	0.124145	7.64381	5.91206e-07	6.98945e-05
ENSMUSG00000025871	0	-0.149446	6.91208	0.0013833	0.00446701
ENSMUSG00000026021	0	-0.175135	6.91566	0.00680398	0.0152492
ENSMUSG00000017466	0	0.807949	8.32742	3.48338e-08	3.18526e-05
ENSMUSG00000030528	0	-0.290623	6.98783	0.00434741	0.0107478
ENSMUSG00000001642	0	-0.0151095	6.69906	0.000705096	0.00273586
ENSMUSG00000059995	0	-0.137092	6.97285	0.017842	0.0332677
ENSMUSG00000040842	0	0.00827755	7.18419	0.0910915	0.128394
ENSMUSG00000026991	0	-0.276691	6.81674	0.000873341	0.00319865
ENSMUSG00000029910	0	-0.231515	6.93115	0.00599017	0.0137956
ENSMUSG00000032400	0	-0.35101	7.09831	5.21288e-05	0.000506875
ENSMUSG00000024404	0	0.11452	7.36285	7.59368e-05	0.000630298
ENSMUSG00000023846	0	-0.173793	6.94816	0.0456141	0.0717443
ENSMUSG00000033335	0	0.176128	7.3542	0.00041121	0.00188581
ENSMUSG00000028455	0	-0.0970773	6.97894	0.0434176	0.0689616
ENSMUSG00000016664	0	0.208143	7.60753	7.10942e-05	0.000607094
ENSMUSG00000021264	0	-0.0597416	7.02598	0.143174	0.188082
ENSMUSG00000022822	0	-0.144381	7.3022	0.00100156	0.00352644
ENSMUSG00000029547	0	-0.0609009	7.02029	0.0534079	0.0819127
ENSMUSG00000027706	0	0.153957	7.52918	7.04744e-05	0.000603681
ENSMUSG00000038533	0	-0.662243	6.4742	8.97637e-05	0.000701551
ENSMUSG00000024384	0	-0.217038	7.14639	0.000436074	0.00196068
ENSMUSG00000001150	0	-0.0173996	6.92699	0.00121684	0.00406093
ENSMUSG00000034993	0	0.387931	7.24224	0.0135089	0.0265508
ENSMUSG00000028837	0	-0.0860325	7.10649	0.0633932	0.0945642
ENSMUSG00000060733	0	-0.437919	6.82225	0.00255034	0.00709286
ENSMUSG00000028873	0	-0.150318	7.06221	0.171932	0.219213
ENSMUSG00000017843	0	0.0060185	7.05512	0.218835	0.269126
ENSMUSG00000000902	0	-0.339339	6.74901	5.45097e-05	0.000519891
ENSMUSG00000027087	0	0.561132	7.62626	0.00192786	0.00573447
ENSMUSG00000022791	0	0.0537801	6.71556	0.000227673	0.00126047
ENSMUSG00000040025	0	-0.193524	6.91681	0.00602691	0.0138557
ENSMUSG00000004393	0	0.0200126	7.04022	0.0735504	0.10718
ENSMUSG00000039985	0	-0.588473	6.31557	5.07622e-05	0.000500012
ENSMUSG00000032280	0	-0.148399	7.01972	0.0981467	0.136705
ENSMUSG00000021890	0	-0.0482299	7.13981	0.0408727	0.0656752
ENSMUSG00000074886	0	-0.178658	6.95087	0.0330528	0.0551701
ENSMUSG00000061755	0	-0.131367	6.86034	0.00162003	0.00503194
ENSMUSG00000029414	0	-0.00707162	6.92418	0.000347368	0.00168397
ENSMUSG00000060802	0	0.547267	6.99808	6.36663e-05	0.000570988
ENSMUSG00000021913	0	-0.74919	6.39806	8.96228e-06	0.000207948
ENSMUSG00000006818	0	-0.795068	6.27637	1.03378e-05	0.000219768
ENSMUSG00000041781	0	-0.100842	7.041	0.452626	0.499237
ENSMUSG00000054309	0	-0.0851577	6.89242	0.0009038	0.00327956
ENSMUSG00000026558	0	-0.183227	7.25802	5.29248e-05	0.000511031
ENSMUSG00000028677	0	-0.199354	6.8325	0.000258116	0.00136992
ENSMUSG00000015755	0	0.0169055	7.20148	0.0284304	0.0486611
ENSMUSG00000022568	0	-0.188607	6.80724	0.000304278	0.00153193
ENSMUSG00000013663	0	-0.00300526	6.96322	0.00237284	0.00670803
ENSMUSG00000024835	0	0.203965	7.15299	0.0354215	0.0583273
ENSMUSG00000027601	0	-0.178902	6.78251	0.000125841	0.000860879
ENSMUSG00000039735	0	-0.186492	7.12566	0.00196638	0.00582142
ENSMUSG00000020044	0	0.809274	8.52957	5.90549e-08	3.50276e-05
ENSMUSG00000021843	0	-0.0928919	7.29093	7.08674e-05	0.000606101
ENSMUSG00000029106	0	0.38615	7.24579	0.000826802	0.00306647
ENSMUSG00000031985	0	-0.452021	6.63086	1.76687e-05	0.000279163
ENSMUSG00000031065	0	-0.057374	6.92256	0.00479038	0.0115616
ENSMUSG00000020694	0	0.017958	7.36812	1.57654e-05	0.000264614
ENSMUSG00000006024	0	0.345708	7.42575	0.00207599	0.00607058
ENSMUSG00000032480	0	-0.205447	6.91439	0.0126766	0.0252138
ENSMUSG00000032959	0	-0.0169432	6.94344	0.00288018	0.00779678
ENSMUSG00000068744	0	0.267224	7.23467	0.0961717	0.134441
ENSMUSG00000031540	0	-0.242675	6.85143	0.00793802	0.017298
ENSMUSG00000034064	0	0.124859	7.04973	0.00454862	0.011115
ENSMUSG00000000957	0	0.717313	7.41051	0.000220845	0.00123356
ENSMUSG00000041328	0	0.0510095	7.20929	0.00199969	0.0058957
ENSMUSG00000029104	0	-0.0266919	7.04397	0.333561	0.385382
ENSMUSG00000022350	0	0.182298	7.20506	0.0565442	0.0859005
ENSMUSG00000030201	0	-0.342954	6.99746	0.00233107	0.00661293
ENSMUSG00000000826	0	0.305624	7.63113	5.06484e-06	0.000155895
ENSMUSG00000049327	0	-0.0145759	7.17944	0.0208105	0.0376356
ENSMUSG00000034560	0	-0.114108	7.13029	0.00471159	0.0114179
ENSMUSG00000057322	0	-0.12776	7.00071	0.227451	0.277962
ENSMUSG00000004455	0	-0.162813	7.02584	0.0778676	0.112353
ENSMUSG00000028179	0	-0.468308	6.52293	0.00881298	0.0187539
ENSMUSG00000068699	0	0.756993	8.21358	1.41083e-07	4.52459e-05
ENSMUSG00000004642	0	-0.0547151	7.13741	0.0145826	0.0282661
ENSMUSG00000038611	0	-0.164415	7.06563	0.0101399	0.0210078
ENSMUSG00000030265	0	-0.226944	6.96061	0.0643979	0.0958544
ENSMUSG00000038406	0	-0.0921967	7.02607	0.114677	0.155572
ENSMUSG00000017831	0	-0.118052	7.14034	0.00278139	0.00757419
ENSMUSG00000035049	0	-0.141935	6.77643	0.000280617	0.00145254
ENSMUSG00000022474	0	0.0171671	6.96713	0.0145227	0.0281774
ENSMUSG00000029578	0	-0.0162968	6.96763	0.013294	0.0261941
ENSMUSG00000020780	0	-0.0462122	7.09015	0.200488	0.249739
ENSMUSG00000031197	0	-0.165666	6.81035	0.000194555	0.00113165
ENSMUSG00000027864	0	-0.574668	6.88885	3.22601e-05	0.000386117
ENSMUSG00000039187	0	-0.113128	6.83736	0.000803586	0.00300281
ENSMUSG00000055239	0	-0.122024	7.18504	6.93142e-05	0.00059724
ENSMUSG00000030722	0	-0.113738	6.71275	0.00836085	0.0179942
ENSMUSG00000028583	0	0.2046	7.61924	9.62602e-05	0.000733516
ENSMUSG00000063480	0	-0.138163	6.89093	0.0135028	0.0265412
ENSMUSG00000035133	0	-0.308681	6.9919	0.00481251	0.0116112
ENSMUSG00000026918	0	-0.414541	6.55913	2.79878e-05	0.000359193
ENSMUSG00000026377	0	-0.138016	6.96239	0.16847	0.215495
ENSMUSG00000048701	0	-0.148684	6.89521	0.011297	0.0229741
ENSMUSG00000039148	0	-0.00534546	6.98399	0.042689	0.0680011
ENSMUSG00000030403	0	0.172846	7.31353	0.00281462	0.00765044
ENSMUSG00000031604	0	0.0345979	6.97244	0.0169496	0.0319623
ENSMUSG00000020173	0	-0.408564	6.40457	0.0108048	0.0221258
ENSMUSG00000022890	0	-0.114905	6.97324	0.110641	0.151229
ENSMUSG00000075592	0	-0.210237	6.61522	1.01262e-05	0.000217871
ENSMUSG00000005936	0	0.0612946	7.22091	0.0108352	0.0221757
ENSMUSG00000042606	0	-0.14547	6.66366	0.000225104	0.00124972
ENSMUSG00000034042	0	0.173246	6.73643	1.9079e-06	0.000103641
ENSMUSG00000024943	0	0.0288841	7.16661	0.0434262	0.0689702
ENSMUSG00000041506	0	-0.240402	6.73057	0.000586502	0.0023956
ENSMUSG00000058550	0	-0.386318	6.31565	0.00068385	0.00267518
ENSMUSG00000034154	0	-0.450147	6.7072	0.00126975	0.0042058
ENSMUSG00000004460	0	0.215463	7.57664	9.13633e-06	0.000209734
ENSMUSG00000040661	0	-0.234807	6.90529	0.00677995	0.0152078
ENSMUSG00000030796	0	-0.142085	6.7509	2.63855e-05	0.000347782
ENSMUSG00000027323	0	-0.131106	7.08362	0.00804845	0.0174692
ENSMUSG00000026039	0	-0.503699	6.71551	5.64445e-05	0.000531588
ENSMUSG00000001380	0	-0.0624398	7.0816	0.0936628	0.131503
ENSMUSG00000030824	0	0.343909	7.48773	6.77724e-05	0.000590424
ENSMUSG00000043940	0	-0.152802	6.93189	0.105106	0.14479
ENSMUSG00000034708	0	0.402182	7.28099	0.00165466	0.00511236
ENSMUSG00000025612	0	-0.0692354	6.93802	0.159154	0.205409
ENSMUSG00000000948	0	-0.426042	6.30902	0.000571794	0.00235598
ENSMUSG00000020611	0	-0.0255	7.06384	0.282615	0.333994
ENSMUSG00000075595	0	-0.624653	6.42572	3.167e-06	0.000127025
ENSMUSG00000032435	0	-0.0452334	7.0495	0.658825	0.693423
ENSMUSG00000027429	0	-0.00138112	7.14706	0.00744159	0.0163887
ENSMUSG00000025817	0	-0.308627	6.9368	0.00188667	0.00563792
ENSMUSG00000030541	0	-0.202956	6.66941	0.000388564	0.00181667
ENSMUSG00000053289	0	-0.224622	6.75121	0.00376086	0.00957937
ENSMUSG00000026516	0	-0.186475	6.79797	0.00135843	0.00440878
ENSMUSG00000075232	0	-0.0627269	6.94518	0.0271234	0.0467811
ENSMUSG00000034931	0	-0.12169	6.95083	0.126501	0.169166
ENSMUSG00000032212	0	-0.129633	6.97077	0.185051	0.233359
ENSMUSG00000029036	0	0.00839372	6.91183	0.0077455	0.0169525
ENSMUSG00000034892	0	-0.112236	6.98391	0.314612	0.366499
ENSMUSG00000017724	0	0.0566997	6.71462	0.00718675	0.015941
ENSMUSG00000038664	0	-0.286452	6.80654	0.00291655	0.00787774
ENSMUSG00000022427	0	-0.0273244	6.91396	0.00337616	0.00881538
ENSMUSG00000026554	0	-0.13752	6.91402	0.0667328	0.0987804
ENSMUSG00000053436	0	0.098291	7.0683	0.298149	0.349884
ENSMUSG00000049878	0	-0.0117213	6.97116	0.0745591	0.108406
ENSMUSG00000024283	0	-0.058304	7.14938	0.00202974	0.00596314
ENSMUSG00000039329	0	0.364489	7.04904	0.0274438	0.0472128
ENSMUSG00000020091	0	-0.16584	6.7996	0.000106511	0.000781248
ENSMUSG00000018160	0	-0.0732312	6.8731	0.00134107	0.0043714
ENSMUSG00000037313	0	-0.0712842	7.14788	0.00418058	0.0104246
ENSMUSG00000015522	0	-0.323882	6.67585	2.75067e-05	0.000356563
ENSMUSG00000033499	0	-0.120624	7.1752	0.000430207	0.00194238
ENSMUSG00000005354	0	0.102899	7.07515	0.27829	0.329681
ENSMUSG00000024791	0	-0.169394	6.69531	0.000269179	0.00140988
ENSMUSG00000076437	0	-0.277548	6.80816	0.0172252	0.0323623
ENSMUSG00000020116	0	-0.137266	6.86866	0.0115914	0.023463
ENSMUSG00000034707	0	0.274464	7.51396	3.85489e-05	0.000427238
ENSMUSG00000020697	0	-0.164618	6.98596	0.040221	0.0647989
ENSMUSG00000028284	0	-0.0496475	7.05866	0.0981906	0.136758
ENSMUSG00000034566	0	-0.0940761	7.04658	0.0617872	0.0925649
ENSMUSG00000038644	0	-0.399514	6.58406	0.000204587	0.00117168
ENSMUSG00000047412	0	-0.560187	6.40238	0.000423083	0.00192196
ENSMUSG00000018846	0	-0.0925925	6.84522	0.0118467	0.0238653
ENSMUSG00000031819	0	-0.177847	6.88845	0.0499884	0.0774914
ENSMUSG00000002845	0	-0.286019	6.77128	0.00334203	0.00874393
ENSMUSG00000026842	0	0.105501	7.00535	0.0348966	0.0576254
ENSMUSG00000030942	0	-0.184251	6.9256	0.0606546	0.0910669
ENSMUSG00000047187	0	0.086544	7.36494	2.73111e-05	0.000355288
ENSMUSG00000020935	0	-0.0249337	6.73943	5.58075e-05	0.000528254
ENSMUSG00000039994	0	-0.176022	6.86779	0.0233648	0.0414221
ENSMUSG00000032058	0	-0.0724398	6.85321	0.00123375	0.00410301
ENSMUSG00000026576	0	0.0434997	7.72556	7.11201e-06	0.00018873
ENSMUSG00000046324	0	0.0194652	7.08352	0.186076	0.234502
ENSMUSG00000027712	0	0.713316	7.89891	2.52423e-07	5.59564e-05
ENSMUSG00000031584	0	-0.356526	6.47897	0.000147316	0.000949767
ENSMUSG00000008730	0	-0.193906	6.9104	0.0727319	0.10615
ENSMUSG00000079641	0	-0.168079	6.88196	0.0265156	0.0459464
ENSMUSG00000051579	0	-0.17417	7.07474	0.00192813	0.00573447
ENSMUSG00000025228	0	0.239843	7.41481	3.72397e-05	0.00041884
ENSMUSG00000030079	0	-0.525299	6.50613	6.16593e-05	0.000560553
ENSMUSG00000023106	0	-0.06448	6.94341	0.141395	0.186091
ENSMUSG00000021171	0	0.379538	7.07484	0.0033935	0.00885221
ENSMUSG00000016831	0	-0.211622	7.13451	0.000208558	0.00118729
ENSMUSG00000033685	0	-0.387538	6.34433	2.90611e-05	0.000365906
ENSMUSG00000030002	0	-0.0624332	7.18235	0.000443712	0.00198334
ENSMUSG00000022353	0	-0.284726	6.74975	0.00265508	0.00731371
ENSMUSG00000007411	0	0.0202588	7.16428	0.00142468	0.00457063
ENSMUSG00000021952	0	-0.789405	6.475	0.000210968	0.00119543
ENSMUSG00000027363	0	-0.251991	6.91609	0.00471374	0.0114219
ENSMUSG00000040688	0	0.0720175	6.85851	0.000568498	0.00234649
ENSMUSG00000021945	0	-0.555934	6.54105	0.000208522	0.00118729
ENSMUSG00000029076	0	0.177139	7.36473	0.000121079	0.00084195
ENSMUSG00000018425	0	-0.208998	6.86414	0.0121782	0.0244099
ENSMUSG00000046572	0	-0.325075	6.62534	0.000223162	0.00124239
ENSMUSG00000030677	0	-0.0985871	6.8044	0.00119744	0.00401696
ENSMUSG00000026260	0	0.085047	7.05857	0.2149	0.264999
ENSMUSG00000074794	0	-0.108693	7.09954	0.0101168	0.020971
ENSMUSG00000045896	0	0.000731041	6.83904	0.000851833	0.00313453
ENSMUSG00000024197	0	-0.00662174	6.95148	0.12115	0.162964
ENSMUSG00000045216	0	-0.503877	6.94648	0.000112644	0.00080655
ENSMUSG00000001729	0	0.480822	7.56939	2.73579e-05	0.000355685
ENSMUSG00000020463	0	-0.156826	7.0359	0.00320521	0.00846775
ENSMUSG00000003099	0	-0.0602282	7.026	0.168469	0.215495
ENSMUSG00000001909	0	-0.123775	6.7923	0.000702898	0.00273023
ENSMUSG00000015839	0	-0.00609284	7.35559	3.43128e-05	0.000400974
ENSMUSG00000023495	0	-0.338498	7.02784	0.000148262	0.000951827
ENSMUSG00000032336	0	0.335082	7.44329	0.000127531	0.000868651
ENSMUSG00000057963	0	-0.383932	6.37395	0.0029764	0.00799736
ENSMUSG00000026743	0	-0.732413	6.49703	2.82619e-06	0.000119276
ENSMUSG00000021814	0	0.138675	7.41833	1.46198e-05	0.000254897
ENSMUSG00000035168	0	-0.0977656	7.04239	0.0271384	0.0467873
ENSMUSG00000023902	0	-0.813208	6.42247	0.00262288	0.00724702
ENSMUSG00000002496	0	-0.0712917	6.93852	0.176845	0.224649
ENSMUSG00000025950	0	-0.0660411	6.89302	0.0146311	0.0283369
ENSMUSG00000061887	0	-0.0385608	7.16056	0.000528849	0.00223625
ENSMUSG00000037461	0	-0.145868	6.77591	0.000484444	0.00210568
[truncated: 19,947 more rows]
